# Supplementary material for: An integrative strategy to identify the entire protein coding potential of prokaryotic genomes by proteogenomics
Source: HighWire-hosted journal article supplement (doi:10.1101/gr.218255.116), 2017-11-15
Supplement: Supplemental_Table_S4.xlsx [file Supplemental_Table_S4.xlsx]

## Sheet: Supplemental Table S4
protein	peptide	charge	synthetic reference peptide m/z	endogenuous peptide m/z	validated
BHRSO01510|ens|geno|+15aa_chemg|prod|NC_005956_205378_214488_+1_ATG_3036	FLGGAASFNNGAFTGPTYK	2	964.475	960.468	TRUE
BHRSO01510|ens|geno|+15aa_chemg|prod|NC_005956_205378_214488_+1_ATG_3036	NLSQNSPGVNYSK	2	708.354	704.347	TRUE
BHRSO01510|ens|geno|+15aa_chemg|prod|NC_005956_205378_214488_+1_ATG_3036	TVSDNLQTAATNIAK	2	777.914	773.907	TRUE
BHPROD|NC_005956_248423_248274_-3_ATG_49	HNTLPSNNGK	2	545.28	541.273	TRUE
BHPROD|NC_005956_248423_248274_-3_ATG_49	SIQSDQANTR	2	565.277	560.273	TRUE
BHGENO0455|+24aa_chemg|prod|NC_005956_453228_453085_-2_ATG_47	TITEDGYGISSQIQ	2	759.873	756.365	TRUE
BHRSO07980|ens|geno|+12aa_chemg|NC_005956_904632_904865_+3_CTG_77	QDVSVISQNLAR	2	670.364	665.36	TRUE
BHRSO10720|ens|geno|+12aa_chemg|NC_005956_1174628_1174395_-3_CTG_77	IGWLPIYLDR	2	628.357	623.353	FALSE
BHGENO0898|-21aa_chemg|prod|NC_005956_922641_922847_+3_ATG_68	IIQYITDMSK	2	610.328	606.321	TRUE
BHGENO0898|-21aa_chemg|prod|NC_005956_922641_922847_+3_ATG_68	SPLLALLLDMAAK	2	682.409	678.402	TRUE
BHGENO1252_-28aa_prod|NC_005956_1266289_1266107_-1_ATG_60	LQSSFYLQTK	2	611.832	607.824	TRUE
BHGENO1252_-28aa_prod|NC_005956_1266289_1266107_-1_ATG_60	VENVTASSQSTEDLK	2	808.399	804.392	TRUE
BHGENO1347|prod|NC_005956_1365815_1365937_+2_ATG_40	VSETSTDVTPVLQGGK	2	813.427	809.42	TRUE
BHPROD|NC_005956_1506024_1506185_+3_ATG_53	SDLQTFISPSQQR	2	758.885	753.881	TRUE
BHRSO14190|ens|geno|+13aa_chemg|prod|NC_005956_1630823_1630671_-3_ATG_50	LIALGTAITTVYGK	2	714.931	710.924	FALSE
BHCHEMG|NC_005956_1680451_1680654_+1_ATG_67	DLNVISANLAR	2	598.337	593.333	TRUE
BHCHEMG|NC_005956_1680451_1680654_+1_ATG_67	SSC+57.021EGWLPIYLER	2	810.392	805.388	TRUE
BH_RS00760_p_+95aa_rso|ens|geno|chemg|prod|NC_005956_216149_217459_+2_ATG_436	FGGSDISLNDFEK	2	718.843	714.836	TRUE
BH_RS00760_p_+95aa_rso|ens|geno|chemg|prod|NC_005956_216149_217459_+2_ATG_436	SLPLYAALDLGTNNC+57.021R	2	894.453	889.449	TRUE
BH_RS00760_p_+95aa_rso|ens|geno|chemg|prod|NC_005956_216149_217459_+2_ATG_436	LAEQITAWTSLPVGVVTLAER	3	755.422	752.086	TRUE
BH_RS00045_p|rso|ens|geno|chemg|prod|NC_005956_11056_9215_-1_ATG_613	HFINTIIQK	2	561.331	557.324	FALSE
BH_RS00045_p|rso|ens|geno|chemg|prod|NC_005956_11056_9215_-1_ATG_613	KPLIVFLEK	2	547.857	543.85	FALSE
BH_RS00045_p|rso|ens|geno|chemg|prod|NC_005956_11056_9215_-1_ATG_613	YATLPDHMAK	2	577.791	573.784	FALSE
BH_RS01070_p|rso|ens|geno|+8aa_chemg|prod|NC_005956_294440_292854_-3_ATG_528	LEILQIADAVAR	2	661.389	656.385	TRUE
BH_RS01070_p|rso|ens|geno|+8aa_chemg|prod|NC_005956_294440_292854_-3_ATG_528	LFTMEVPEIYDGIIEIK	2	1009.54	1005.53	TRUE
BH_RS01070_p|rso|ens|geno|+8aa_chemg|prod|NC_005956_294440_292854_-3_ATG_528	VQAGWINQADLVTENSAENEK	3	775.38	772.708	TRUE
BH_RS01725_p|rso|ens|geno|+51aa_chemg|-10aa_prod|NC_005956_414618_414079_-2_ATG_179	LYLQGNINQDQYDAAQK	2	995.491	991.484	TRUE
BH_RS01725_p|rso|ens|geno|+51aa_chemg|-10aa_prod|NC_005956_414618_414079_-2_ATG_179	MPSSSDEAAR	2	530.734	525.73	TRUE
BH_RS02905_p_+27aa_chemg|NC_005956_689177_689647_+2_TTG_156	VGVC+57.021ALYFLPDNPIIK	2	914.002	909.995	FALSE
BH_RS03265_p|geno|chemg|prod|NC_005956_779536_779742_+1_ATG_68	VMTQQALTK	2	514.288	510.281	TRUE
BH_RS05235_p|geno|prod|NC_005956_1180943_1180695_-3_ATG_82	DVDIPLYPDESSK	2	743.364	739.356	TRUE
BH_RS05255_p|rso|ens|geno|chemg|prod|NC_005956_1187589_1189322_+3_ATG_577	AAEESLPLR	2	498.273	493.269	TRUE
BH_RS05255_p|rso|ens|geno|chemg|prod|NC_005956_1187589_1189322_+3_ATG_577	TNHIVIIGYSR	2	641.861	636.857	FALSE
BH_RS05255_p|rso|ens|geno|chemg|prod|NC_005956_1187589_1189322_+3_ATG_577	AIADGFEVIC+57.021GNIIK	2	814.434	810.427	TRUE
BH_RS05910_p|chemg|prod|NC_005956_1359604_1358879_-1_ATG_241	FDKPYPVELILNNIVASR	3	700.057	696.721	TRUE
BH_RS05910_p|chemg|prod|NC_005956_1359604_1358879_-1_ATG_241	FNDGRPADAHDLVWGMR	3	656.312	652.976	FALSE
BH_RS06340_p|rso|ens|geno_fCDS_p|chemg|prod|NC_005956_1462346_1459863_-3_ATG_827	HLSGSNAGR	2	454.732	449.728	TRUE
BH_RS06340_p|rso|ens|geno_fCDS_p|chemg|prod|NC_005956_1462346_1459863_-3_ATG_827	IAFDNVTITGK	2	593.832	589.824	TRUE
BH_RS06340_p|rso|ens|geno_fCDS_p|chemg|prod|NC_005956_1462346_1459863_-3_ATG_827	VLASASTLEGSTHVDDR	3	589.963	586.627	TRUE
BH_RS03865_p|rso|ens|geno|chemg|prod|NC_005956_896083_896409_+1_ATG_108	HVVSEEDGR	2	519.248	514.244	TRUE
BH_RS03865_p|rso|ens|geno|chemg|prod|NC_005956_896083_896409_+1_ATG_108	SHTSEVIGIFGGPPGLR	3	578.645	575.309	FALSE
BH_RS06550_p_+196aa_rso|ens|geno|chemg|prod|NC_005956_1530764_1532368_+2_ATG_534	NPLYEGVGSGK	2	564.792	560.785	TRUE
BH_RS06550_p_+196aa_rso|ens|geno|chemg|prod|NC_005956_1530764_1532368_+2_ATG_534	NRPSPPTSR	2	511.274	506.27	TRUE
BH_RS06550_p_+196aa_rso|ens|geno|chemg|prod|NC_005956_1530764_1532368_+2_ATG_534	TPSPQAEPLYAQVNKPPR	3	668.358	665.022	TRUE
BH_RS07170_p_+280aa_rso|ens|geno|prod|NC_005956_1657853_1658998_+2_ATG_381	AFASTVASGLSEK	2	638.337	634.33	TRUE
BH_RS07170_p_+280aa_rso|ens|geno|prod|NC_005956_1657853_1658998_+2_ATG_381	TQSFPATPTNEK	2	664.832	660.825	TRUE
BH_RS07170_p_+280aa_rso|ens|geno|prod|NC_005956_1657853_1658998_+2_ATG_381	NAPSLIDR	2	448.247	443.243	FALSE
BH_RS08360_p_+94aa_rso|ens|geno|prod|NC_005956_1919910_1921160_+3_ATG_416	IEEILPVSSVEQEK	2	804.435	800.427	TRUE
BH_RS08360_p_+94aa_rso|ens|geno|prod|NC_005956_1919910_1921160_+3_ATG_416	LGADAASLAFDAYEK	2	775.385	771.378	TRUE
BH_RS08360_p_+94aa_rso|ens|geno|prod|NC_005956_1919910_1921160_+3_ATG_416	VIITDIISEK	2	569.844	565.837	TRUE
BH_RS06550_p|orf|NC_005956_1532223_1532378_+3_ATG_51	NTDIIVVITHK	2	630.874	626.867	FALSE
BHORF|NC_005956_32067_31933_-2_ATG_44	QSGGTILK	2	406.242	402.235	TRUE
BHORF|NC_005956_318344_318478_+2_ATG_44	APIIPVSAHVER	3	433.587	430.251	TRUE
BHORF|NC_005956_842169_842240_+3_ATG_23	NESFFTEVLLR	2	682.858	677.854	TRUE
BHORF|NC_005956_1211005_1210769_-1_ATG_78	TLQISNEAFVPILSAK	2	869.995	865.988	TRUE
BHORF|NC_005956_1305464_1305568_+2_ATG_34	TLDHAPIFYILC+57.021IMK	3	614.996	612.325	TRUE
BHORF|NC_005956_1392322_1392423_+1_ATG_33	GLEQLTNSLHK	2	624.345	620.338	FALSE
BHORF|NC_005956_1458660_1458538_-2_GTG_40	SLHNYPHYYGSVR	3	534.928	531.592	FALSE
Novel start sites
BH_RS00060_+4aa_chemg|prod|NC_005956_13874_12930_-3_GTG_314	MKPNMLAQC+57.021FQPNSSGIYPQEK	3	859.411	856.74	FALSE
BH_RS00170|+2aa_rso|prod|NC_005956_44330_43332_-3_ATG_332	MQLDC+57.021ALYQHPK	3	504.579	501.908	TRUE
BH_RS00170_+2aa_rso|ens|geno|chemg|NC_005956_44336_43332_-3_TTG_334	IMQLDC+57.021ALYQHPK	3	542.274	539.602	FALSE
BH_RS00170_+2aa_rso|ens|geno|chemg|NC_005956_44336_43332_-3_TTG_334	MIMQLDC+57.021ALYQHPK	3	585.954	583.282	FALSE
BH_RS01750_+63aa_chemg|NC_005956_416972_416364_-3_ATG_202	IISLGNEALQMLDEK	2	841.45	837.443	TRUE
BH_RS01750_+63aa_chemg|NC_005956_416972_416364_-3_ATG_202	MEHKPIPK	2	494.28	490.273	FALSE
BH_RS01750_+63aa_chemg|NC_005956_416972_416364_-3_ATG_202	QDNSAVVPIELHNTC+57.021PISK	2	1065.54	1061.53	FALSE
BH_RS01840|rso|ens|geno|chemg|-2aa_prod|NC_005956_426588_427751_+3_ATG_387	MLEKPTC+57.021RPNNPNFSSGPC+57.021SK	3	810.38	807.708	FALSE
BH_RS01965_+3aa_chemg|NC_005956_460744_459992_-1_ATG_250	SNMINETR	2	487.734	482.729	TRUE
BH_RS01980|rso|ens|geno|+22aa_chemg|+8aa_prod|NC_005956_466312_464624_-1_ATG_562	MINLNSGYR	2	539.273	534.269	TRUE
BH_RS01980_+22aa_chemg|NC_005956_466378_464624_-1_TTG_584	IMINLNSGYR	2	595.815	590.811	TRUE
BH_RS03120|rso|ens|geno|+1aa_chemg|prod|NC_005956_737930_738976_+2_ATG_348	ADTFFFTPSR	2	599.792	594.788	TRUE
BH_RS03120_+1aa_chemg|NC_005956_737927_738976_+2_TTG_349	MMADTFFFTPSR	2	730.832	725.828	FALSE
BH_RS03465_+136aa_rso|ens|geno|NC_005956_814642_815256_+1_ATG_204	QDLVNPLQDIAQQMAQYVTR	3	781.066	777.73	FALSE
BH_RS04005_+56aa_rso|ens|geno|chemg|NC_005956_926836_928632_+1_ATG_598	NMPMSGVLAQNSR	2	707.844	702.84	FALSE
BH_RS04375|rso|ens|geno|+3aa_chemg|prod|NC_005956_1010230_1009622_-1_ATG_202	MSESLEELAAYLK	2	746.378	742.371	TRUE
BH_RS04375|rso|ens|geno|+3aa_chemg|prod|NC_005956_1010230_1009622_-1_ATG_202	SESLEELAAYLK	2	680.858	676.851	TRUE
BH_RS04375_+1aa_orf|NC_005956_1010233_1009622_-1_TTG_203	MMSESLEELAAYLK	2	811.898	807.891	TRUE
BH_RS04375_+2aa_orf|NC_005956_1010236_1009622_-1_TTG_204	MLMSESLEELAAYLK	2	868.44	864.433	TRUE
BH_RS05885|rso|ens|geno|chemg|prod|NC_005956_1352974_1352192_-1_GTG_260	VFQDPYASLHPR	2	720.369	715.365	TRUE
BH_RS05885|rso|ens|geno|chemg|prod|NC_005956_1352974_1352192_-1_GTG_260	MVFQDPYASLHPR	3	524.262	520.926	FALSE
BH_RS07350|rso|ens|geno|chemg|-2aa_prod|NC_005956_1689906_1690343_+3_ATG_145	MLMFIAPLLNHLVGGELK	2	1002.57	998.56	FALSE
BH_RS07350_-2aa_prod|NC_005956_1689912_1690343_+3_ATG_143	MFIAPLLNHLVGGELK	3	587.339	584.667	TRUE
Earlier results (novel ORFs) with prototype based on RefSeq2013 Db
BH_RS00155|-5aa_geno_fCDS4_p|+4aa_chemg|prod|NC_005956_37874_37404_-3_ATG_156	LSTTEEIDELGLYEAR	2	924.959	919.955	TRUE
BH_RS00155|-5aa_geno_fCDS4_p|+4aa_chemg|prod|NC_005956_37874_37404_-3_ATG_156	LVTLTSAQHSSEC+57.021LQR	3	613.98	610.644	TRUE
BH_RS01385|geno|prod|NC_005956_365498_365740_+2_ATG_80	DLFFGEQVNPLLNK	2	821.44	817.433	TRUE
BH_RS01385|geno|prod|NC_005956_365498_365740_+2_ATG_80	FILPTHPGNHTVFWK	2	901.485	897.478	FALSE
BH_RS06435|geno|chemg|prod|NC_005956_1503851_1503621_-3_ATG_76	IGTKPTNK	2	433.763	429.756	TRUE
BH_RS06435|geno|chemg|prod|NC_005956_1503851_1503621_-3_ATG_76	LTIDVPENLHR	3	439.578	436.242	TRUE
BH_RS06435|geno|chemg|prod|NC_005956_1503851_1503621_-3_ATG_76	SIPLTADAWVGNHK	3	506.271	503.6	TRUE
BH_RS06460|prod|NC_005956_1509467_1509709_+2_ATG_80	IHSVEEFK	2	498.766	494.759	TRUE
BH_RS07235|+3aa_chemg|prod|NC_005956_1673314_1672901_-1_TTG_137	LEEAIC+57.021TGAK	2	550.281	546.274	TRUE
BH_RS07235|+3aa_chemg|prod|NC_005956_1673314_1672901_-1_TTG_137	LQNEPLLGETK	2	625.348	621.34	TRUE
BH_RS08145|chemg|prod|NC_005956_1870496_1870317_-3_ATG_59	GALELPSSMIEK	2	641.844	637.837	TRUE
BH_RS08145|chemg|prod|NC_005956_1870496_1870317_-3_ATG_59	TTQETFSSK	2	518.755	514.748	TRUE
Selected novelties from the MQB277 assembly
BHPROD|MQB277_1482632_1479591_-2_ATG_1013	VSYGSYYSC+57.021NNC+57.021VK	2	854.863	850.856	TRUE
BHPROD|MQB277_1482632_1479591_-2_ATG_1013	AVQAIGTPTHVVLK	3	481.292	478.621	TRUE
BHPROD|MQB277_1482632_1479591_-2_ATG_1013	ILASASTLEGGAHVDDR	3	574.628	571.292	TRUE
BHPROD|MQB277_1482632_1479591_-2_ATG_1013	HLGGSNAGHSLK	2	593.314	589.307	FALSE
BHPROD|MQB277_1482632_1479591_-2_ATG_1013	NVTVHSEISDKPYTR	3	585.968	582.632	FALSE
BHPROD|MQB277_1485255_1483354_-1_ATG_633	DINEELVIR	2	555.805	550.801	TRUE
BHPROD|MQB277_1485255_1483354_-1_ATG_633	NLGSAALGK	2	419.747	415.74	TRUE
BHPROD|MQB277_1485255_1483354_-1_ATG_633	QHC+57.021PGGNFFDLSSATDK	2	944.922	940.915	TRUE
BHPROD|MQB277_1485255_1483354_-1_ATG_633	TFAYNILSGSR	2	619.824	614.82	TRUE
BHPROD|MQB277_1485255_1483354_-1_ATG_633	SFAEKPANDSK	3	401.203	398.531	TRUE
BHPROD|MQB277_1488740_1485681_-2_ATG_1019	LSLQPLEVEQSQK	2	753.916	749.909	TRUE
BHPROD|MQB277_1488740_1485681_-2_ATG_1019	TFSATDEPR	2	517.245	512.241	TRUE
BHPROD|MQB277_214117_214854_+1_ATG_245	SAILDPAAIIGAK	2	624.376	620.369	TRUE
BHPROD|MQB277_214955_235648_+2_GTG_6897	TDGNIDYTSVTLGK	2	746.374	742.367	TRUE
BHPROD|MQB277_214955_235648_+2_GTG_6897	EANAFVADHGAEGK	3	475.228	472.557	TRUE
BHPROD|MQB277_214955_235648_+2_GTG_6897	SYQNVAAALTGVGSSFTNIR	3	689.356	686.02	TRUE
BHPROD|MQB277_214955_235648_+2_GTG_6897	ITHLLAGDISK	2	588.347	584.34	FALSE
BHPROD|MQB277_1022721_1021576_-1_ATG_381	LNDPLAVGVWAK	2	645.868	641.861	TRUE
BHPROD|MQB277_1181453_1181022_-2_ATG_143	VYTTTPR	2	424.231	419.227	TRUE
BHPROD|MQB277_124383_115819_-1_ATG_2854	TALVSDVEVIEDYPIAYK	2	1017.03	1013.02	TRUE
BHPROD|MQB277_1322228_1321755_-2_ATG_157	AHGDLSENAEYHAAK	3	540.921	538.25	TRUE
BHPROD|MQB277_1328462_1329802_+2_ATG_446	FSADAHLHK	2	517.269	513.262	TRUE
BHPROD|MQB277_1348473_1349384_+3_ATG_303	DEHTYLR	2	472.229	467.225	TRUE
BHPROD|MQB277_1379912_1378368_-2_ATG_514	SWRPGEAILLR	3	436.587	433.251	TRUE
BHPROD|MQB277_1868654_1867311_-2_ATG_447	FSGVVNALLR	2	543.321	538.317	TRUE
BHPROD|MQB277_313197_310660_-1_ATG_845	AAMSGLLSPEQR	2	635.328	630.324	TRUE
BHPROD|MQB277_434987_434787_-2_ATG_66	DGFELVK	2	408.223	404.216	TRUE
BHPROD|MQB277_501616_499922_-3_ATG_564	QYNQAVQILENAVR	2	828.441	823.436	TRUE
BHPROD|MQB277_772686_773390_+3_ATG_234	AADNLGLSGK	2	477.261	473.254	TRUE
Evidence for longer/shorter isoforms RefSeq2015 versus RefSeq2013
BH_RS00785|-6aa_rso|+19aa_chemg|prod|NC_005956_221426_222682_+2_ATG_418	MTLEEQMK	2	509.245	505.238	TRUE
BH_RS01740|-1aa_rso|chemg|prod|NC_005956_415537_415830_+1_ATG_97;BH_RS04620|-1aa_rso|chemg|prod|NC_005956_1044754_1045047_+1_ATG_97	MMYNPPHPGGILK	2	731.875	727.868	TRUE
BH_RS01950|-33aa_rso|chemg|prod|NC_005956_458693_457809_-3_ATG_294	SHPLIFDHER	2	630.822	625.817	FALSE
BH_RS02705|+10aa_rso|prod|NC_005956_636879_635590_-2_ATG_429	SINSETQGISK	2	586.306	582.299	TRUE
BH_RS02710|-47aa_rso|chemg|prod|NC_005956_637444_641460_+1_ATG_1338	AVGLSEQPR	2	483.766	478.762	TRUE
BH_RS03790|-38aa_rso|chemg|prod|NC_005956_881950_883134_+1_GTG_394	AVLWHGIHATPSMIAVQR	3	666.364	663.028	TRUE
BH_RS04075|+10aa_rso|prod|NC_005956_939449_939661_+2_GTG_70	MNADEIK	2	414.704	410.697	TRUE
BH_RS05450|+26aa_rso|+45aa_chemg|prod|NC_005956_1238230_1237253_-1_ATG_325	MINFQLIDGEALLAR	3	571.979	568.643	TRUE
BH_RS05730|-19aa_rso|+41aa_chemg|+33aa_prod|NC_005956_1316539_1315040_-1_ATG_499	SMPAFVDLEELLATR	2	851.441	846.437	FALSE
BH_RS05955|-34aa_rso|chemg|prod|NC_005956_1369032_1368217_-2_GTG_271	AYTPAEVTMSDIAK	2	752.876	748.869	TRUE
BH_RS06385|-42aa_rso|+5aa_chemg|prod|NC_005956_1475631_1474501_-2_ATG_376	LHSAFMDWAMR	3	458.882	455.546	TRUE
BH_RS06450|-11aa_rso|+5aa_chemg|prod|NC_005956_1507170_1506169_-2_ATG_333	LQGIDMLPLVWK	2	710.909	706.902	TRUE
BH_RS06910|-39aa_rso|chemg|prod|NC_005956_1618129_1616804_-1_ATG_441	SFALMSAVIGYR	2	662.852	657.847	FALSE
BH_RS07620|+34aa_rso|NC_005956_1747631_1749193_+2_ATG_520	NSEIVQENDILQDDILIEK	2	1118.58	1114.57	TRUE
BH_RS07770|+6aa_rso|+8aa_chemg|NC_005956_1783093_1783767_+1_ATG_224	THNSYDSQPLPQDNLESSFQK	3	815.047	812.375	TRUE
BH_RS07815|-6aa_rso|prod|NC_005956_1802308_1802021_-1_GTG_95	NMNLDELQEMR	2	701.82	696.816	TRUE
