# Supplementary material for: An integrative strategy to identify the entire protein coding potential of prokaryotic genomes by proteogenomics
Source: HighWire-hosted journal article supplement (doi:10.1101/gr.218255.116), 2017-11-15
Supplement: Supplemental_Table_S5.xlsx [file Supplemental_Table_S5.xlsx]

## Sheet: Bhen Reference
Please find the legend to this table on the third sheet.	Gene information							Annotation information								Protein information & properties																				Experimental evidence								subcellular localization
iPtgxDB ID	Chromosome	Start	End	Reading frame	Start codon	Gene length	has ortholog in proteobacteria	RefSeq2015	RefSeq2013/Ensembl	Genoscope	ChemGenome	Prodigal	in-silico ORF	RefSeq2013 - RefSeq2015 mapping	Mapping in assembly	Protein length	PSORTb localization	TM domains	Signal peptide	LipoP feature	Gene3D	PANTHER	Pfam	PIRSF	PRINTS	ProSitePatterns	ProSiteProfiles	SignalP	SMART	Superfamily	TIGRFAM	TMHMM	EggNOG name	EggNOG level	EggNOG category	identified by proteomics	#peptides	#PSMs	DESeq log2(induced/uninduced)	DESeq p-value	RPKM	RPKM uninduced2	RPKM induced2	P-score TM	P-score Cyt	P-score IM	P-score OM	SCL
BH_RS00005|rso|ens|geno|chemg|-11aa_prod|NC_005956_1_825_+1_GTG_274	NC_005956	1	825	+1	GTG	822	0	BH_RS00005	BH00010	BH00010	1..825(+)	NC_005956_00010	ORF_34..825_263aa_+1	n to n	BHPROD_+11aa_orf|MQB277_1_825_+1_GTG_274,BHPROD|MQB277_34_825_+1_ATG_263	274	Cytoplasmic	0		CYT	-	PTHR31756,PTHR31756:SF2	PF03618;Kinase/pyrophosphorylase	-	-	-	-	-	-	-	-	-	Bifunctional serine threonine kinase and phosphorylase involved in the regulation of the pyruvate, phosphate dikinase (PPDK) by catalyzing its phosphorylation dephosphorylation (By similarity)	aproNOG	S	1	22	371	-0.256148	0.724576	361.644	408.137	778.188	10	0	9.99969	2.18153e-09	IM predominant
BH_RS00010|rso|ens|geno|+5aa_chemg|NC_005956_837_1433_+3_ATG_198	NC_005956	837	1433	+3	ATG	594	0	BH_RS00010	BH00020	BH00020	822..1433(+)	NC_005956_00020	ORF_822..1433_203aa_+3	n to n	BHPROD|MQB277_822_1433_+3_ATG_203	198	Cytoplasmic	0		CYT	G3DSA:3.90.950.10	PTHR11746:SF62,PTHR11746	PF02545;Maf-like protein	PIRSF006305	-	-	-	-	-	SSF52972	TIGR00172;maf: septum formation protein Maf	-	Maf-like protein	aproNOG	D	1	14	101	0.266019	0.840156	249.06	248.703	545.977	0.152322	0.586376	8.66844	0.68239
BH_RS00015|rso|ens|geno|+4aa_chemg|prod|NC_005956_1426_2307_+1_ATG_293	NC_005956	1426	2307	+1	ATG	879	0	BH_RS00015	BH00030	BH00030	1414..2307(+)	NC_005956_00030	ORF_1426..2307_293aa_+1	n to n	BHPROD|MQB277_1426_2307_+1_ATG_293	293	Cytoplasmic	0		CYT	G3DSA:3.40.50.720,G3DSA:3.40.192.10	PTHR21089:SF1,PTHR21089	PF01488;Shikimate / quinate 5-dehydrogenase,PF08501;Shikimate dehydrogenase substrate binding domain	-	-	-	-	-	-	SSF53223,SSF51735	TIGR00507;aroE: shikimate dehydrogenase	-	shikimate dehydrogenase	aproNOG	E	1	5	12	1.46632	0.755087	175.936	182.744	500.511	4.375	0	4.85876	0	IM exclusive
BH_RS00020|rso|ens|geno|chemg|prod|NC_005956_2304_2891_+3_ATG_195	NC_005956	2304	2891	+3	ATG	585	0	BH_RS00020	BH00040	BH00040	2304..2891(+)	NC_005956_00040	ORF_2304..2891_195aa_+3	n to n	BHPROD|MQB277_2304_2891_+3_ATG_195	195	Cytoplasmic	0		CYT	G3DSA:3.40.50.300	PTHR10695	PF01121;Dephospho-CoA kinase	-	-	-	PS51219;Dephospho-CoA kinase (DPCK) domain profile.	-	-	SSF52540	TIGR00152;TIGR00152: dephospho-CoA kinase	-	Catalyzes the phosphorylation of the 3'-hydroxyl group of dephosphocoenzyme A to form coenzyme A (By similarity)	aproNOG	H	1	21	110	-0.0641967	0.975766	160.589	132.605	267.848	2.71801	0.00544269	5	0	IM exclusive
BHCHEMG|NC_005956_3293_3517_+2_TTG_74	NC_005956	3293	3517	+2	TTG	222	1				3293..3517(+)		ORF_3296..3517_73aa_+2			74	CytoplasmicMembrane	0	yes	TMH	-	-	-	-	-	-	-	-	-	-	-	TMhelix;Region of a membrane-bound protein predicted to be embedded in the membrane.				0	0	0	NA	NA	0	0	0
BH_RS00025|rso|ens|geno|chemg|prod|NC_005956_2896_3603_+1_ATG_235	NC_005956	2896	3603	+1	ATG	705	0	BH_RS00025	BH00050	BH00050	2896..3603(+)	NC_005956_00050	ORF_2896..3603_235aa_+1	n to n	BHPROD|MQB277_2896_3603_+1_ATG_235	235	Cytoplasmic	0		CYT	G3DSA:3.30.420.10	PTHR30231:SF0,PTHR30231	PF00929;Exonuclease	-	-	-	-	-	SM00479;Target=BH_RS00025|rso|ens|geno|chemg|prod|NC_005956_2896_3603_+1_ATG_235 2 172	SSF53098	TIGR01406;dnaQ_proteo: DNA polymerase III, epsilon subunit,TIGR00573;dnaq: exonuclease, DNA polymerase III, epsilon subunit family	-	DNA polymerase iii, epsilon	aproNOG	L	1	19	207	-0.0838791	0.937617	475.483	544.81	1115.05	9.98787	1.77636e-15	9.88704	9.26447e-05	IM predominant
BH_RS00030|rso|ens|geno|+8aa_chemg|prod|NC_005956_3932_6838_+2_ATG_968	NC_005956	3932	6838	+2	ATG	2904	0	BH_RS00030	BH00060	BH00060	3908..6838(+)	NC_005956_00060	ORF_3932..6838_968aa_+2	n to n	BHPROD|MQB277_3932_6838_+2_ATG_968	968	Cytoplasmic	0		CYT	G3DSA:3.30.70.370,G3DSA:1.10.150.20,G3DSA:1.20.1060.10,G3DSA:3.30.420.10,G3DSA:3.40.50.1010	PTHR10133:SF27,PTHR10133	PF01612;3'-5' exonuclease,PF02739;5'-3' exonuclease, N-terminal resolvase-like domain,PF01367;5'-3' exonuclease, C-terminal SAM fold,PF00476;DNA polymerase family A	-	PR00868;DNA-polymerase family A (pol I) signature	PS00447;DNA polymerase family A signature.	-	-	SM00474;3'-5' exonuclease,SM00279;Helix-hairpin-helix class 2 (Pol1 family) motifs,SM00482;DNA polymerase A domain,SM00475;5'-3' exonuclease	SSF53098,SSF56672,SSF47807,SSF88723	TIGR00593;pola: DNA polymerase I	-	DNA polymerase I	aproNOG	L	1	67	604	0.21729	0.721311	363.012	353.811	879.391	0.397328	4.94982e-11	8.25661	0
BH_RS00035|+7aa_rso|prod|NC_005956_7714_6854_-1_ATG_286	NC_005956	6854	7714	-1	ATG	858	0	BH_RS00035	BH00070	BH00070	6854..7735(-)	NC_005956_00070	ORF_6854..7714_286aa_-1	n to n	BHPROD|MQB277_7714_6854_-3_ATG_286	286	Cytoplasmic	0		CYT	G3DSA:3.60.10.10	PTHR14859	PF03372;Endonuclease/Exonuclease/phosphatase family	-	-	-	-	-	-	SSF56219	-	-	endonuclease exonuclease phosphatase	aproNOG	S	1	21	124	-0.24588	0.840603	38.0007	41.434	98.6476	8.84982	0.00017941	4.96776	0.0160586	TM predominant
BH_RS00040|rso|ens|geno|chemg|prod|NC_005956_8600_7827_-3_ATG_257	NC_005956	7827	8600	-3	ATG	771	0	BH_RS00040	BH00080	BH00080	7827..8600(-)	NC_005956_00080	ORF_7827..8600_257aa_-3	n to n	BHPROD|MQB277_8600_7827_-2_ATG_257	257	CytoplasmicMembrane	7		CYT	-	PTHR23291:SF34,PTHR23291	PF01027;Inhibitor of apoptosis-promoting Bax1	-	-	-	-	-	-	-	-	TMhelix;Region of a membrane-bound protein predicted to be embedded in the membrane.	integral membrane protein	aproNOG	S	1	8	165	-2.75285	0.012484	6704.26	14980	8597.37	10	0	9.29196	0.176338	TM exclusive
BH_RS00045_p|rso|ens|geno|chemg|prod|NC_005956_11056_9215_-1_ATG_613	NC_005956	9215	11056	-1	ATG	1839	1	BH_RS00045(p)	BH00090	BH00090	9215..11056(-)	NC_005956_00090	ORF_9215..11056_613aa_-1	n to p	BHPROD|MQB277_11056_9215_-3_ATG_613	613	CytoplasmicMembrane	12		CYT	G3DSA:1.20.1250.20	-	PF07690;Major Facilitator Superfamily	-	-	-	-	-	SM00563;Phosphate acyltransferases	SSF69593,SSF103473	-	TMhelix;Region of a membrane-bound protein predicted to be embedded in the membrane.	PlsC	aproNOG	I	1	9	33	-2.39166	0.356839	1252.19	1439.09	2877.06	6.83594	0	4.81053	0.0604751	TM exclusive
BH_RS00050|rso|ens|geno|chemg|prod|NC_005956_12082_11591_-1_ATG_163	NC_005956	11591	12082	-1	ATG	489	0	BH_RS00050	BH00100	BH00100	11591..12082(-)	NC_005956_00100	ORF_11591..12082_163aa_-1	n to n	BHPROD|MQB277_12082_11591_-3_ATG_163	163	CytoplasmicMembrane	3	yes	TMH	-	-	PF01252;Signal peptidase (SPase) II	-	PR00781;Lipoprotein signal peptidase family (A8) signature	PS00855;Signal peptidases II signature.	-	-	-	-	TIGR00077;lspA: signal peptidase II	TMhelix;Region of a membrane-bound protein predicted to be embedded in the membrane.	This protein specifically catalyzes the removal of signal peptides from prolipoproteins (By similarity)	aproNOG	O	1	2	4	NA	NA	457.915	629.81	1009.77	0	0	3.7995	0	IM exclusive
BH_RS00055|+5aa_rso|prod|NC_005956_12927_12079_-2_ATG_282	NC_005956	12079	12927	-2	ATG	846	0	BH_RS00055	BH00110	BH00110	12079..12942(-)	NC_005956_00110	ORF_12079..12927_282aa_-2	n to n	BHPROD|MQB277_12927_12079_-1_ATG_282	282	Cytoplasmic	0		CYT	G3DSA:3.40.1280.10,G3DSA:3.30.1330.30	PTHR12029,PTHR12029:SF8	PF08032;RNA 2'-O ribose methyltransferase substrate binding,PF00588;SpoU rRNA Methylase family	-	-	-	-	-	SM00967;RNA 2'-O ribose methyltransferase substrate binding	SSF55315,SSF75217	-	-	trna rrna methyltransferase	aproNOG	J	1	11	27	0.14439	0.987475	169.381	206.646	362.789	8.02889	0.00259399	4.68165	0.0484445	TM predominant
BH_RS00060_+4aa_chemg|prod|NC_005956_13874_12930_-3_GTG_314	NC_005956	12930	13874	-3	GTG	942	0	BH_RS00060	BH00120	BH00120	12930..13874(-)	NC_005956_00120	ORF_12930..13862_310aa_-3	n to n	BHPROD|MQB277_13874_12930_-2_GTG_314	314	Unknown	0		CYT	G3DSA:3.40.50.150	PTHR11061,PTHR11061:SF15	PF13659;Methyltransferase domain	-	-	-	-	-	-	SSF53335	-	-	methyltransferase	aproNOG	S	1	19	71	0.203284	1	418.446	438.934	771.796	0.0777561	2.21034	7.33522	0.00168593
BH_RS00065|rso|ens|geno|+4aa_chemg|prod|NC_005956_14326_14030_-1_ATG_98	NC_005956	14030	14326	-1	ATG	294	0	BH_RS00065	BH00130	BH00130	14030..14338(-)	NC_005956_00130	ORF_14030..14338_102aa_-1	n to n	BHPROD|MQB277_14326_14030_-3_ATG_98	98	CytoplasmicMembrane	2		TMH	-	-	PF06305;Protein of unknown function (DUF1049)	-	-	-	-	-	-	-	-	TMhelix;Region of a membrane-bound protein predicted to be embedded in the membrane.	Protein of unknown function (DUF1049)	aproNOG	S	1	2	23	-0.440573	0.911942	987.334	1026.2	2286.24	6.99661	0.0195312	0.63018	3.23535	TM predominant
BHCHEMG|NC_005956_14525_14331_-3_TTG_64	NC_005956	14331	14525	-3	TTG	192	1				14331..14525(-)		ORF_14331..14498_55aa_-3			64	CytoplasmicMembrane	0	yes	CYT	-	-	-	-	-	-	-	-	-	-	-	-				0	0	0	NA	NA	0	0	0
BH_RS00070|rso|ens|geno|prod|NC_005956_14613_14335_-2_TTG_92	NC_005956	14335	14613	-2	TTG	276	0	BH_RS00070	BH00140	BH00140		NC_005956_00140	ORF_14335..14403_22aa_-2	n to n	BHPROD|MQB277_14613_14335_-1_TTG_92	92	Cytoplasmic	0		CYT	G3DSA:4.10.520.10	-	PF00216;Bacterial DNA-binding protein	-	PR01727;Prokaryotic integration host factor signature	PS00045;Bacterial histone-like DNA-binding proteins signature.	-	-	SM00411;bacterial (prokaryotic) histone like domain	SSF47729	TIGR00988;hip: integration host factor, beta subunit	-	This protein is one of the two subunits of integration host factor, a specific DNA-binding protein that functions in genetic recombination as well as in transcriptional and translational control (By similarity)	aproNOG	K	1	16	326	0.164289	0.830148	206.584	108.867	449.234	0	10	4.43824	0.267843	Cyt predominant
BH_RS00075|rso|ens|geno|chemg|prod|NC_005956_14805_15455_+3_ATG_216	NC_005956	14805	15455	+3	ATG	648	0	BH_RS00075	BH00150	BH00150	14805..15455(+)	NC_005956_00150	ORF_14805..15455_216aa_+3	n to n	BHPROD|MQB277_14805_15455_+3_ATG_216	216	Unknown	1		CYT	-	-	PF06835;Lipopolysaccharide-assembly, LptC-related	-	-	-	-	-	-	-	-	TMhelix;Region of a membrane-bound protein predicted to be embedded in the membrane.	Pfam:DUF1239	aproNOG	S	1	4	6	NA	NA	4873.19	5979.56	9612.04	2.5	0	4.15965	0	IM exclusive
BH_RS00080|-10aa_rso|chemg|prod|NC_005956_15537_16145_+3_ATG_202	NC_005956	15537	16145	+3	ATG	606	0	BH_RS00080	BH00160	BH00160	15537..16145(+)	NC_005956_00160	ORF_15537..16145_202aa_+3	n to n	BHPROD|MQB277_15537_16145_+3_ATG_202	202	Unknown	0	yes	SpI	G3DSA:2.60.450.10	-	PF03968;OstA-like protein	-	-	-	-	-	-	-	-	TMhelix;Region of a membrane-bound protein predicted to be embedded in the membrane.	OstA family	aproNOG	S	1	4	17	Inf	0.130073	683.819	809.895	1510.69	6.83594	0	3.7995	0	IM exclusive
BH_RS00085|rso|ens|geno|chemg|prod|NC_005956_16152_16946_+3_ATG_264	NC_005956	16152	16946	+3	ATG	792	0	BH_RS00085	BH00170	BH00170	16152..16946(+)	NC_005956_00170	ORF_16152..16946_264aa_+3	n to n	BHPROD|MQB277_16152_16946_+3_ATG_264	264	Cytoplasmic	0		CYT	G3DSA:3.40.50.300	PTHR24220:SF70,PTHR24220	PF00005;ABC transporter	-	-	PS00211;ABC transporters family signature.	PS50893;ATP-binding cassette, ABC transporter-type domain profile.	-	SM00382;ATPases associated with a variety of cellular activities	SSF52540	TIGR04406;LPS_export_lptB: LPS export ABC transporter ATP-binding protein	-	ABC transporter	aproNOG	S	1	43	367	-0.348764	0.630371	157.912	155.942	367.052	10	0	3.66081e-07	9.99999	TM exclusive
BH_RS00090|geno|chemg|prod|NC_005956_17164_17355_+1_ATG_63	NC_005956	17164	17355	+1	ATG	189	1	BH_RS00090		BARHE0018	17164..17355(+)	NC_005956_00180	ORF_17164..17355_63aa_+1	0 to n	BHPROD|MQB277_17164_17355_+1_ATG_63	63	Unknown	0		CYT	-	-	-	-	-	-	-	-	-	-	-	-				0	0	0	NA	NA	848.149	1243.84	1730.94
BHCHEMG|NC_005956_18024_17821_-2_ATG_67	NC_005956	17821	18024	-2	ATG	201	1				17821..18024(-)		ORF_17821..18024_67aa_-2			67	Unknown	0		CYT	-	-	-	-	-	-	-	-	-	-	-	-				0	0	0	NA	NA	35.7735	33.9034	122.736
BHGENO0019|NC_005956_17783_17923_+2_CTG_46	NC_005956	17783	17923	+2	CTG	138	1			BARHE0019			ORF_17813..17923_36aa_+2			46	Unknown	0	yes	CYT	-	-	-	-	-	-	-	-	-	-	-	-				0	0	0	NA	NA	13.5652	11.5089	30.5494
BH_RS00095|rso|ens|geno|chemg|prod|NC_005956_18188_18652_+2_ATG_154	NC_005956	18188	18652	+2	ATG	462	0	BH_RS00095	BH00180	BH00180	18188..18652(+)	NC_005956_00190	ORF_18188..18652_154aa_+2	n to n	BHPROD|MQB277_18188_18652_+2_ATG_154	154	Cytoplasmic	0		CYT	G3DSA:3.40.930.10	PTHR30505	PF00359;Phosphoenolpyruvate-dependent sugar phosphotransferase system, EIIA 2	-	-	PS00372;PTS EIIA domains phosphorylation site signature 2.	PS51094;PTS_EIIA type-2 domain profile.	-	-	SSF55804	TIGR01419;nitro_reg_IIA: PTS IIA-like nitrogen-regulatory protein PtsN	-	PTS IIA-like nitrogen-regulatory protein PtsN	aproNOG	G	1	18	187	0.917425	0.311956	669.753	565.714	1731.78	0.531399	9.80592e-05	8.58784	0	IM exclusive
BHPROD|NC_005956_19245_19358_+3_ATG_37	NC_005956	19245	19358	+3	ATG	111	1					NC_005956_00200	ORF_19245..19358_37aa_+3		BHPROD|MQB277_19245_19358_+3_ATG_37	37	Unknown	0		CYT	-	-	-	-	-	-	-	-	-	-	-	-				0	0	0	NA	NA	20.6992	14.6939	37.6339
BH_RS00100|+2aa_rso|prod|NC_005956_19668_20171_+3_ATG_167	NC_005956	19668	20171	+3	ATG	501	0	BH_RS00100	BH00190	BH00190	19662..20171(+)	NC_005956_00210	ORF_19662..20171_169aa_+3	n to n	BHPROD|MQB277_19668_20171_+3_ATG_167	167	Unknown	0	yes	SpI	-	-	PF06776;Invasion associated locus B (IalB) protein	-	-	-	-	SignalP-noTM	-	-	-	-	NA	aproNOG	S	1	63	2127	-0.539791	0.249826	806.896	763.845	1745.63	10	0	9.99899	0.000232834	IM predominant
BH_RS00105|rso|ens|geno|+3aa_chemg|prod|NC_005956_20212_21438_+1_ATG_408	NC_005956	20212	21438	+1	ATG	1224	0	BH_RS00105	BH00200	BH00200	20203..21438(+)	NC_005956_00220	ORF_20212..21438_408aa_+1	n to n	BHPROD|MQB277_20212_21438_+1_ATG_408	408	Cytoplasmic	0		CYT	G3DSA:3.20.20.70	PTHR30544:SF5,PTHR30544	-	PIRSF006004	-	-	-	-	-	SSF102114	TIGR00048;rRNA_mod_RlmN: 23S rRNA (adenine(2503)-C(2))-methyltransferase	-	Specifically methylates position 2 of adenine 2503 in 23S rRNA and position 2 of adenine 37 in tRNAs. m2A2503 modification seems to play a crucial role in the proofreading step occurring at the peptidyl transferase center and thus would serve to optimize ribosomal fidelity (By similarity)	aproNOG	J	1	16	75	1.55378	0.262548	2097.99	2106.47	5936.72	9.99821	0	5	0	IM exclusive
BH_RS00110|rso|ens|geno|chemg|prod|NC_005956_22081_21443_-1_ATG_212	NC_005956	21443	22081	-1	ATG	636	0	BH_RS00110	BH00210	BH00210	21443..22081(-)	NC_005956_00230	ORF_21443..22081_212aa_-1	n to n	BHPROD|MQB277_22081_21443_-3_ATG_212	212	CytoplasmicMembrane	6		TMH	-	PTHR30086	PF01810;LysE type translocator	PIRSF006324	-	-	-	-	-	-	-	TMhelix;Region of a membrane-bound protein predicted to be embedded in the membrane.	lysine exporter protein LysE YggA	aproNOG	E	1	1	2	NA	NA	1901.73	1831.53	3777.59	0	0	2.55	0	IM exclusive
BHGENOBH00220_fCDS1_p|NC_005956_22318_22449_+1_ACG_43	NC_005956	22318	22449	+1	ACG	129	1		BH00220(p)	BH00220(p)			ORF_22339..22449_36aa_+1	p to 0		43	Unknown	0		CYT	-	-	-	-	-	-	-	-	-	-	-	-	Citrulline--aspartate ligase	aproNOG	E	0	0	0	NA	NA	45.5502	40.2757	118.707
BHGENOBH00220-2_fCDS2_p|NC_005956_22459_22542_+1_TTG_28	NC_005956	22459	22542	+1	TTG	81	1		BH00220(p)	BH00220-2(p)				p to 0		28	Unknown	1		CYT	G3DSA:3.40.50.620	-	PF00764;Arginosuccinate synthase	-	-	-	-	-	-	-	-	-	Citrulline--aspartate ligase	aproNOG	E	0	0	0	NA	NA	2.46603	1.60901	10.3854
BHGENOBH00220-3_fCDS3_p|NC_005956_22544_22729_+2_CTG_61	NC_005956	22544	22729	+2	CTG	183	0		BH00220(p)	BH00220-3(p)			ORF_22544..22729_61aa_+2	p to 0		61	Unknown	0		CYT	-	-	-	-	-	-	-	-	-	-	-	-	Citrulline--aspartate ligase	aproNOG	E	0	0	0	NA	NA	46.6137	38.6513	104.007
BHRSO00230_p|ens_p|geno_p|NC_005956_23371_23481_+1_ATG_37	NC_005956	23371	23481	+1	ATG	108	6		BH00230(p)	BH00230(p)				p to 0		37	Unknown	0		CYT	-	-	-	-	-	-	-	-	-	-	-	-				0	0	0	NA	NA	1105.77	992.841	1296.9
BHPROD|NC_005956_23532_23636_+3_ATG_34	NC_005956	23532	23636	+3	ATG	102	1		BH00220(p)	BH00220-4(p)		NC_005956_00240	ORF_23532..23636_34aa_+3	p to 0	BHPROD|MQB277_23532_23636_+3_ATG_34	34	Unknown	0		CYT	G3DSA:3.90.1260.10	-	-	-	-	-	-	-	-	SSF69864	-	-	Citrulline--aspartate ligase	aproNOG	E	0	0	0	NA	NA	105.318	120.522	176.917
BHGENO0026|NC_005956_24011_23847_-3_ATG_54	NC_005956	23847	24011	-3	ATG	162	1			BARHE0026			ORF_23847..24011_54aa_-3			54	Unknown	1		TMH	-	-	-	-	-	-	-	-	-	-	-	TMhelix;Region of a membrane-bound protein predicted to be embedded in the membrane.	NA	aproNOG	S	0	0	0	NA	NA	54.578	55.1453	121.129
BHGENO0027|NC_005956_24129_23992_-2_TTG_45	NC_005956	23992	24129	-2	TTG	135	1			BARHE0027			ORF_23992..24063_23aa_-2			45	CytoplasmicMembrane	1		CYT	-	-	-	-	-	-	-	-	-	-	-	TMhelix;Region of a membrane-bound protein predicted to be embedded in the membrane.				0	0	0	NA	NA	23.4989	12.6866	49.6487
BH_RS00120|rso|ens|geno|+1aa_chemg|prod|NC_005956_24179_25840_+2_ATG_553	NC_005956	24179	25840	+2	ATG	1659	0	BH_RS00120	BH00240	BH00240	24176..25840(+)	NC_005956_00250	ORF_24176..25840_554aa_+2	n to n	BHPROD|MQB277_24179_25840_+2_ATG_553	553	Cytoplasmic	0		CYT	G3DSA:1.10.10.350,G3DSA:3.40.50.620	-	PF01921;tRNA synthetases class I (K)	-	-	PS00178;Aminoacyl-transfer RNA synthetases class-I signature.	-	-	-	SSF52374,SSF48163	TIGR00467;lysS_arch: lysine--tRNA ligase	-	lysyl-tRNA synthetase	aproNOG	J	1	62	770	0.473813	0.399906	181.371	205.571	411.025	0	10	9.9997	9.19858e-05	Cyt predominant
BHCHEMG|NC_005956_27275_26919_-3_TTG_118	NC_005956	26919	27275	-3	TTG	354	0				26919..27275(-)		ORF_26919..27125_68aa_-3			118	Unknown	0	yes	CYT	-	-	-	-	-	-	-	-	-	-	-	-				0	0	0	NA	NA	0	0	0
BHCHEMG|NC_005956_27596_27399_-3_ATG_65	NC_005956	27399	27596	-3	ATG	195	1				27399..27596(-)		ORF_27399..27596_65aa_-3			65	Unknown	0		CYT	-	-	-	-	-	-	-	-	-	-	-	-				0	0	0	NA	NA	6.61999	4.67372	6.23162
BH_RS00125|rso|ens|geno|chemg|prod|NC_005956_25840_27417_+1_ATG_525	NC_005956	25840	27417	+1	ATG	1575	0	BH_RS00125	BH00250	BH00250	25840..27417(+)	NC_005956_00260	ORF_25840..27417_525aa_+1	n to n	BHPROD|MQB277_25840_27417_+1_ATG_525	525	Cytoplasmic	0		CYT	G3DSA:3.30.70.870,G3DSA:2.40.30.10,G3DSA:3.40.50.300	PTHR23115,PTHR23115:SF69	PF00009;Elongation factor Tu GTP binding domain,PF03144;Elongation factor Tu domain 2	-	PR00315;GTP-binding elongation factor signature	PS00301;Translational (tr)-type guanine nucleotide-binding (G) domain signature.	PS51722;Translational (tr)-type guanine nucleotide-binding (G) domain profile.	-	-	SSF54980,SSF50447,SSF52540	TIGR00231;small_GTP: small GTP-binding protein domain,TIGR00503;prfC: peptide chain release factor 3	-	Increases the formation of ribosomal termination complexes and stimulates activities of RF-1 and RF-2. It binds guanine nucleotides and has strong preference for UGA stop codons. It may interact directly with the ribosome. The stimulation of RF- 1 and RF-2 is significantly reduced by GTP and GDP, but not by GMP (By similarity)	aproNOG	J	1	23	134	0.944365	0.369565	110.804	115.232	270.043	0	10	7.84729	4.13842e-05	Cyt predominant
BH_RS00130|rso|ens|geno|+7aa_chemg|prod|NC_005956_27840_27517_-2_ATG_107	NC_005956	27517	27840	-2	ATG	321	0	BH_RS00130	BH00260	BH00260	27517..27861(-)	NC_005956_00270	ORF_27517..27861_114aa_-2	n to n	BHPROD|MQB277_27840_27517_-1_ATG_107	107	Cytoplasmic	0		CYT	G3DSA:3.40.30.10	PTHR10438	PF00085;Thioredoxin	PIRSF000077	PR00421;Thioredoxin family signature	PS00194;Thioredoxin family active site.	PS51352;Thioredoxin domain profile.	-	-	SSF52833	TIGR01068;thioredoxin: thioredoxin	-	Thioredoxin	aproNOG	O	1	30	978	0.472219	0.37461	2949.73	2040.4	4713.72	0	10	1.80005	7.32342	Cyt predominant
BH_RS00135|rso|ens|geno|+13aa_chemg|prod|NC_005956_31418_27936_-3_ATG_1160	NC_005956	27936	31418	-3	ATG	3480	0	BH_RS00135	BH00270	BH00270	27936..31457(-)	NC_005956_00280	ORF_27936..31457_1173aa_-3	n to n	BHPROD|MQB277_31418_27936_-2_ATG_1160	1160	Cytoplasmic	0		CYT	G3DSA:3.40.50.300,G3DSA:1.10.486.10	PTHR11070:SF7,PTHR11070	PF12705;PD-(D/E)XK nuclease superfamily,PF13361;UvrD-like helicase C-terminal domain,PF00580;UvrD/REP helicase N-terminal domain	-	-	-	PS51217;UvrD-like DNA helicase C-terminal domain profile.,PS51198;UvrD-like DNA helicase ATP-binding domain profile.	-	-	SSF52540,SSF52980	TIGR02784;addA_alphas: double-strand break repair helicase AddA	-	helicase	aproNOG	L	1	35	73	0.82387	0.566408	626.832	419.002	1492.82	9.99247	0	4.99999	1.02602e-06	TM exclusive
BHORF|NC_005956_28770_28633_-2_GTG_45	NC_005956	28633	28770	-2	GTG	135	1						ORF_28633..28770_45aa_-2			45	Unknown	0		CYT	-	-	-	-	-	-	-	-	-	-	-	-				0	1	1	NA	NA	0	0	0
BHCHEMG|NC_005956_28441_28668_+1_ATG_75	NC_005956	28441	28668	+1	ATG	225	1				28441..28668(+)		ORF_28441..28668_75aa_+1			75	Unknown	0		CYT	-	-	-	-	-	-	-	-	-	-	-	-				0	0	0	NA	NA	0	0	0
BH_RS00140|rso|ens|geno|chemg|prod|NC_005956_34537_31415_-1_ATG_1040	NC_005956	31415	34537	-1	ATG	3120	0	BH_RS00140	BH00280	BH00280	31415..34537(-)	NC_005956_00290	ORF_31415..34537_1040aa_-1	n to n	BHPROD|MQB277_34537_31415_-3_ATG_1040	1040	CytoplasmicMembrane	0	yes	CYT	-	-	PF12705;PD-(D/E)XK nuclease superfamily	-	-	-	-	-	-	SSF52540	TIGR02786;addB_alphas: double-strand break repair protein AddB	-	double-strand break repair protein Addb	aproNOG	L	1	25	82	-0.481215	0.742233	501.307	523.942	1282.99	9.75687	9.53674e-06	4.9944	0.00175603	TM predominant
BHORF|NC_005956_32067_31933_-2_ATG_44	NC_005956	31933	32067	-2	ATG	132	1						ORF_31933..32067_44aa_-2		BHORF|MQB277_32067_31933_-1_ATG_44	44	Unknown	0		CYT	-	-	-	-	-	-	-	-	-	-	-	-				1	1	6	NA	NA	0	0	0	0.15625	5	2.55	0	Cyt predominant
BHGENO0033|NC_005956_35385_35230_-2_ATG_51	NC_005956	35230	35385	-2	ATG	153	1			BARHE0033			ORF_35230..35385_51aa_-2			51	Unknown	0		CYT	-	-	-	-	-	-	-	-	-	-	-	-				0	0	0	NA	NA	351.628	405.071	862.92
BHPROD|NC_005956_36382_36176_-1_ATG_68	NC_005956	36176	36382	-1	ATG	204	1					NC_005956_00300	ORF_36176..36382_68aa_-1		BHPROD|MQB277_36382_36176_-3_ATG_68	68	Unknown	0		CYT	-	-	-	-	-	-	-	-	-	-	-	-				0	0	0	NA	NA	64.7217	60.8942	150.356
BH_RS00145|+38aa_geno_fCDS1_p|prod|NC_005956_36822_36397_-2_ATG_141	NC_005956	36397	36822	-2	ATG	423	0	BH_RS00145	BH00290(p)	BH00290(p)	36397..36936(-)	NC_005956_00310	ORF_36397..36822_141aa_-2	p to n+n+n	BHPROD|MQB277_36822_36397_-1_ATG_141	141	Unknown	0		CYT	G3DSA:3.90.1200.10	-	PF01636;Phosphotransferase enzyme family	-	-	-	-	-	-	SSF56112	-	-	Uncharacterised P-loop hydrolase UPF0079	aproNOG	S	0	0	0	NA	NA	41.8665	21.8016	146.597
BHCHEMG|NC_005956_36375_36608_+3_GTG_77	NC_005956	36375	36608	+3	GTG	231	1		BH00290(p)		36375..36608(+)		ORF_36504..36608_34aa_+3	p to n+n+n		77	Unknown	0		CYT	-	-	-	-	-	-	-	-	-	-	-	-				0	0	0	NA	NA	0	0	0
BH_RS00150|geno_fCDS2_p|chemg|prod|NC_005956_37249_37025_-1_ATG_74	NC_005956	37025	37249	-1	ATG	222	0	BH_RS00150	BH00290(p)	BH00290-2(p)	37025..37249(-)	NC_005956_00320	ORF_37025..37249_74aa_-1	p to n+n+n	BHPROD|MQB277_37249_37025_-3_ATG_74	74	Unknown	0		CYT	G3DSA:3.30.200.20	-	-	-	-	-	-	-	-	-	-	-	Uncharacterised P-loop hydrolase UPF0079	aproNOG	S	0	0	0	NA	NA	81.3224	77.1429	163.102
BHGENOBH00290-3_fCDS3_p|NC_005956_37368_37282_-2_TTG_28	NC_005956	37282	37368	-2	TTG	84	1		BH00290(p)	BH00290-3(p)			ORF_37282..37368_28aa_-2	p to n+n+n		28	Unknown	0		CYT	-	-	-	-	-	-	-	-	-	-	-	-	Aminoglycoside phosphotransferase	aproNOG	S	0	0	0	NA	NA	6.32427	1.45288	13.0759
BH_RS00155|-5aa_geno_fCDS4_p|+4aa_chemg|prod|NC_005956_37874_37404_-3_ATG_156	NC_005956	37404	37874	-3	ATG	468	0	BH_RS00155	BH00290(p)	BH00290-4(p)	37404..37886(-)	NC_005956_00330	ORF_37404..37886_160aa_-3	p to n+n+n	BHPROD|MQB277_37874_37404_-2_ATG_156	156	Cytoplasmic	0		CYT	G3DSA:3.40.50.300	-	PF02367;Uncharacterised P-loop hydrolase UPF0079	-	-	-	-	-	-	SSF52540	TIGR00150;T6A_YjeE: tRNA threonylcarbamoyl adenosine modification protein YjeE	-	Uncharacterised P-loop hydrolase UPF0079	aproNOG	S	1	4	14	0.0512805	1	102.941	98.8812	247.678	0.0134277	7.73437	3.40263	4.17181	Cyt predominant
BHCHEMG|NC_005956_38158_37874_-1_GTG_94	NC_005956	37874	38158	-1	GTG	282	1				37874..38158(-)		ORF_37874..38245_123aa_-1			94	CytoplasmicMembrane	1		CYT	-	-	-	-	-	-	-	-	-	-	-	TMhelix;Region of a membrane-bound protein predicted to be embedded in the membrane.				0	0	0	NA	NA	0.0517031	0	0
BH_RS00160|rso|ens|geno|+32aa_chemg|prod|NC_005956_40394_37929_-3_GTG_821	NC_005956	37929	40394	-3	GTG	2463	0	BH_RS00160	BH00300	BH00300	37929..40490(-)	NC_005956_00340	ORF_37929..40349_806aa_-3	n to n	BHPROD|MQB277_40394_37929_-2_GTG_821	821	CytoplasmicMembrane	2	yes	TMH	G3DSA:1.10.287.130,G3DSA:3.30.450.20,G3DSA:3.30.565.10	PTHR24423	PF12860;PAS fold,PF02518;Histidine kinase-, DNA gyrase B-, and HSP90-like ATPase,PF13188;PAS domain,PF00512;His Kinase A (phospho-acceptor) domain	-	PR00344;Bacterial sensor protein C-terminal signature	-	PS50109;Histidine kinase domain profile.,PS50112;PAS repeat profile.	-	SM00387;Histidine kinase-like ATPases,SM00388;His Kinase A (phosphoacceptor) domain,SM00091;PAS domain	SSF47384,SSF55785,SSF55874	-	TMhelix;Region of a membrane-bound protein predicted to be embedded in the membrane.	Histidine kinase	aproNOG	T	1	60	354	-0.570519	0.435584	287.407	253.596	574.186	10	0	9.50761	0	IM predominant
BHCHEMG|NC_005956_39133_38894_-1_ATG_79	NC_005956	38894	39133	-1	ATG	237	1				38894..39133(-)		ORF_38894..39133_79aa_-1			79	CytoplasmicMembrane	0		CYT	-	-	-	-	-	-	-	-	-	-	-	-				0	0	0	NA	NA	0	0	0
BH_RS00165|rso|ens|geno|chemg|prod|NC_005956_41829_40432_-2_ATG_465	NC_005956	40432	41829	-2	ATG	1395	0	BH_RS00165	BH00310	BH00310	40432..41829(-)	NC_005956_00350	ORF_40432..41829_465aa_-2	n to n	BHPROD|MQB277_41829_40432_-1_ATG_465	465	Cytoplasmic	0		CYT	G3DSA:3.40.50.720,G3DSA:3.40.50.1480	PTHR23420	PF05221;S-adenosyl-L-homocysteine hydrolase,PF00670;S-adenosyl-L-homocysteine hydrolase, NAD binding domain	PIRSF001109	-	PS00739;S-adenosyl-L-homocysteine hydrolase signature 2.,PS00738;S-adenosyl-L-homocysteine hydrolase signature 1.	-	-	SM00996;S-adenosyl-L-homocysteine hydrolase,SM00997;S-adenosyl-L-homocysteine hydrolase, NAD binding domain	SSF51735,SSF52283	TIGR00936;ahcY: adenosylhomocysteinase	-	May play a key role in the regulation of the intracellular concentration of adenosylhomocysteine (By similarity)	aproNOG	H	1	43	447	0.200917	0.765382	711.951	585.551	1975.96	0	10	8.28252	0.792137	Cyt predominant
BHCHEMG|NC_005956_40640_40870_+2_TTG_76	NC_005956	40640	40870	+2	TTG	228	0				40640..40870(+)		ORF_40721..40870_49aa_+2			76	Unknown	0		CYT	-	-	-	-	-	-	-	-	-	-	-	-				0	0	0	NA	NA	0	0	0
BH_RS00170|+2aa_rso|prod|NC_005956_44330_43332_-3_ATG_332	NC_005956	43332	44330	-3	ATG	996	0	BH_RS00170	BH00320	BH00320	43332..44336(-)	NC_005956_00360	ORF_43332..44330_332aa_-3	n to n	BHPROD_+2aa_orf|MQB277_44336_43332_-2_TTG_334,BHPROD|MQB277_44330_43332_-2_ATG_332	332	CytoplasmicMembrane	0		CYT	G3DSA:3.40.50.720	PTHR12126,PTHR12126:SF4	PF13460;NADH(P)-binding	-	-	-	-	-	-	SSF51735	-	-	NADH-Ubiquinone oxidoreductase	aproNOG	GM	1	31	492	-0.728812	0.270192	152.163	164.846	361.672	10	0	9.92779	0.00898505	IM predominant
BH_RS00175|rso|ens|geno|chemg|prod|NC_005956_45693_44374_-2_ATG_439	NC_005956	44374	45693	-2	ATG	1317	0	BH_RS00175	BH00330	BH00330	44374..45693(-)	NC_005956_00370	ORF_44374..45693_439aa_-2	n to n	BHPROD|MQB277_45693_44374_-1_ATG_439	439	Cytoplasmic	0		CYT	G3DSA:3.90.190.20,G3DSA:3.40.1190.10	PTHR11136,PTHR11136:SF0	PF08245;Mur ligase middle domain	PIRSF001563	-	PS01012;Folylpolyglutamate synthase signature 2.	-	-	-	SSF53623,SSF53244	TIGR01499;folC: bifunctional protein FolC	-	folC bifunctional protein	aproNOG	H	1	11	34	0.807355	0.724163	23.6537	20.6815	61.1679	7.74844	0.00201225	4.98837	0	IM exclusive
BHCHEMG|NC_005956_45563_45339_-3_CTG_74	NC_005956	45339	45563	-3	CTG	222	1				45339..45563(-)		ORF_45339..45539_66aa_-3			74	CytoplasmicMembrane	0	yes	CYT	-	-	-	-	-	-	-	-	-	-	-	TMhelix;Region of a membrane-bound protein predicted to be embedded in the membrane.				0	0	0	NA	NA	0	0	0
BH_RS00180|rso|ens|geno|chemg|prod|NC_005956_46617_45697_-2_ATG_306	NC_005956	45697	46617	-2	ATG	918	0	BH_RS00180	BH00340	BH00340	45697..46617(-)	NC_005956_00380	ORF_45697..46617_306aa_-2	n to n	BHPROD|MQB277_46617_45697_-1_ATG_306	306	Cytoplasmic	0		CYT	G3DSA:3.90.226.10	PTHR22855,PTHR22855:SF17	PF01039;Carboxyl transferase domain	-	PR01070;Acetyl-CoA carboxylase carboxyl transferase beta subunit signature	-	PS50980;Acetyl-coenzyme A carboxyltransferase domain N-terminal region profile.	-	-	SSF52096	TIGR00515;accD: acetyl-CoA carboxylase, carboxyl transferase, beta subunit	-	Component of the acetyl coenzyme A carboxylase (ACC) complex. Biotin carboxylase (BC) catalyzes the carboxylation of biotin on its carrier protein (BCCP) and then the CO(2) group is transferred by the transcarboxylase to acetyl-CoA to form malonyl- CoA (By similarity)	aproNOG	I	1	51	1303	-0.254726	0.61639	1509.9	1784.73	3442.4	10	0	10	0	IM predominant
BHGENO0042|NC_005956_46966_46871_-1_TTG_31	NC_005956	46871	46966	-1	TTG	93	1			BARHE0042			ORF_46871..46966_31aa_-1			31	Unknown	0		CYT	-	-	-	-	-	-	-	-	-	-	-	-				0	0	0	NA	NA	363.026	448.07	527.454
BHRSO00350_p|ens_p|geno_p|NC_005956_47357_47175_-3_ATG_61	NC_005956	47175	47357	-3	ATG	180	6		BH00350(p)	BH00350(p)				p to 0		61	Unknown	0		CYT	-	-	-	-	-	-	-	-	-	-	-	-				0	0	0	NA	NA	226.194	203.708	514.146
BH_RS00185|rso|ens|geno|-20aa_chemg|prod|NC_005956_48347_47628_-3_ATG_239	NC_005956	47628	48347	-3	ATG	717	0	BH_RS00185	BH00360	BH00360	47628..48287(-)	NC_005956_00390	ORF_47628..48347_239aa_-3	n to n	BHPROD|MQB277_48347_47628_-2_ATG_239	239	CytoplasmicMembrane	6		TMH	-	-	PF07264;Etoposide-induced protein 2.4 (EI24)	-	-	-	-	-	-	-	-	TMhelix;Region of a membrane-bound protein predicted to be embedded in the membrane.	CysZ-like protein	aproNOG	E	1	2	5	NA	NA	214.595	224.669	306.729	6.83594	0	1.5	0	IM exclusive
BHCHEMG|NC_005956_47893_48021_+1_TTG_42	NC_005956	47893	48021	+1	TTG	126	1				47893..48021(+)		ORF_47926..48021_31aa_+1			42	Unknown	0		CYT	-	-	-	-	-	-	-	-	-	-	-	-				0	0	0	NA	NA	0	0	0
BHRSO00370_p|ens_p|geno_p|NC_005956_48785_48916_+2_GGT_44	NC_005956	48785	48916	+2	GGT	129	1		BH00370(p)	BH00370(p)				p to 0		44	Unknown	0		CYT	-	-	-	-	-	-	-	-	-	-	-	-				0	0	0	NA	NA	86.0083	81.9546	215.358
BH_RS00190|rso|ens|geno|+3aa_chemg|prod|NC_005956_50893_49481_-1_ATG_470	NC_005956	49481	50893	-1	ATG	1410	0	BH_RS00190	BH00380	BH00380	49481..50902(-)	NC_005956_00400	ORF_49481..50893_470aa_-1	n to n	BHPROD|MQB277_50893_49481_-3_ATG_470	470	Cytoplasmic	0		CYT	G3DSA:3.40.50.10300,G3DSA:3.40.50.1950	PTHR14359:SF6,PTHR14359	PF02441;Flavoprotein,PF04127;DNA / pantothenate metabolism flavoprotein	-	-	-	-	-	-	SSF47598,SSF102645,SSF52507	TIGR00521;coaBC_dfp: phosphopantothenoylcysteine decarboxylase / phosphopantothenate--cysteine ligase	-	Phosphopantothenoylcysteine decarboxylase	aproNOG	H	1	24	125	-0.516404	0.655561	136.275	105.808	322.486	10	0	4.99475	0.00173496	TM exclusive
BH_RS00195|rso|ens|geno|chemg|prod|NC_005956_52550_50964_-3_ATG_528	NC_005956	50964	52550	-3	ATG	1584	0	BH_RS00195	BH00390	BH00390	50964..52550(-)	NC_005956_00410	ORF_50964..52550_528aa_-3	n to n	BHPROD|MQB277_52550_50964_-2_ATG_528	528	CytoplasmicMembrane	1		CYT	G3DSA:3.90.1200.10	PTHR10566	PF03109;ABC1 family	-	-	-	-	-	-	SSF56112	TIGR01982;UbiB: 2-polyprenylphenol 6-hydroxylase	TMhelix;Region of a membrane-bound protein predicted to be embedded in the membrane.	Required, probably indirectly, for the hydroxylation of 2-octaprenylphenol to 2-octaprenyl-6-hydroxy-phenol, the fourth step in ubiquinone biosynthesis (By similarity)	aproNOG	H	1	31	296	-0.333383	0.672512	48.8301	64.3224	123.353	10	0	7.84766	3.55271e-15	TM exclusive
BHORF|NC_005956_50973_51176_+3_ATG_67	NC_005956	50973	51176	+3	ATG	201	1						ORF_50973..51176_67aa_+3			67	Unknown	0		CYT	-	-	-	-	-	-	-	-	-	-	-	-				0	1	1	NA	NA	0	0	0
BH_RS00200|rso|ens|geno|+33aa_chemg|prod|NC_005956_53336_52554_-3_ATG_260	NC_005956	52554	53336	-3	ATG	780	0	BH_RS00200	BH00400	BH00400	52554..53435(-)	NC_005956_00420	ORF_52554..53336_260aa_-3	n to n	BHPROD|MQB277_53336_52554_-2_ATG_260	260	Cytoplasmic	0		CYT	G3DSA:3.40.50.150	PTHR10108:SF24,PTHR10108	PF01209;ubiE/COQ5 methyltransferase family	-	-	PS01184;ubiE/COQ5 methyltransferase family signature 2.,PS01183;ubiE/COQ5 methyltransferase family signature 1.	PS51608;UbiE family SAM-binding methyltransferase profile.	-	-	SSF53335	TIGR01934;MenG_MenH_UbiE: ubiquinone/menaquinone biosynthesis methyltransferase	-	Methyltransferase required for the conversion of demethylmenaquinone (DMKH2) to menaquinone (MKH2) and the conversion of 2-polyprenyl-6-methoxy-1,4-benzoquinol (DDMQH2) to 2-polyprenyl-3-methyl-6-methoxy-1,4-benzoquinol (DMQH2) (By similarity)	aproNOG	H	1	20	199	-0.511987	0.580492	2120.16	1322.69	6336	9.99995	0	9.78804	8.16822e-11	IM predominant
BH_RS00205|rso|ens|geno|chemg|prod|NC_005956_55885_53453_-1_ATG_810	NC_005956	53453	55885	-1	ATG	2430	0	BH_RS00205	BH00410	BH00410	53453..55885(-)	NC_005956_00430	ORF_53453..55885_810aa_-1	n to n	BHPROD|MQB277_55885_53453_-3_ATG_810	810	Cytoplasmic	0		CYT	G3DSA:3.30.565.10,G3DSA:3.40.50.670,G3DSA:3.30.230.10	PTHR10169:SF40,PTHR10169	PF01751;Toprim domain,PF00986;DNA gyrase B subunit, carboxyl terminus,PF00204;DNA gyrase B,PF02518;Histidine kinase-, DNA gyrase B-, and HSP90-like ATPase	-	PR01159;DNA gyrase subunit B signature,PR00418;DNA topoisomerase II family signature	PS00177;DNA topoisomerase II signature.	PS50880;Toprim domain profile.	-	SM00387;Histidine kinase-like ATPases,SM00433;TopoisomeraseII	SSF54211,SSF56719,SSF55874	TIGR01059;gyrB: DNA gyrase, B subunit	-	DNA gyrase negatively supercoils closed circular double- stranded DNA in an ATP-dependent manner and also catalyzes the interconversion of other topological isomers of double-stranded DNA rings, including catenanes and knotted rings (By similarity)	aproNOG	L	1	95	1290	0.224184	0.657385	3839.28	4411.37	9753.44	0	3.93889	9.99999	1.42712e-06
BHGENO0048|NC_005956_56893_56672_-1_CTG_73	NC_005956	56672	56893	-1	CTG	219	0		BH00420(p)	BARHE0048			ORF_56672..56734_20aa_-1	p to 0	BHGENO1954|NC_005956_1904609_1904830_+2_CTG_73	73	Unknown	0		CYT	-	-	-	-	-	-	-	-	-	-	-	-	Integrase	aproNOG	L	0	0	0	NA	NA	0	0	0
BHCHEMG|NC_005956_57361_57191_-1_ATG_56	NC_005956	57191	57361	-1	ATG	168	1				57191..57361(-)		ORF_57191..57361_56aa_-1		BHCHEMG|NC_005956_1904141_1904311_+2_ATG_56,BHCHEMG|NC_005956_69555_69385_-2_ATG_56	56	Unknown	0		CYT	-	-	-	-	-	-	-	-	-	-	-	-				0	0	0	NA	NA	0.705339	0	3.82814
BHGENO0049|NC_005956_57925_57791_-1_TTG_44	NC_005956	57791	57925	-1	TTG	132	1			BARHE0049			ORF_57791..57925_44aa_-1			44	Unknown	0		CYT	-	-	-	-	-	-	-	-	-	-	-	-				0	0	0	NA	NA	20.2111	11.4326	64.2588
BHGENO0050|NC_005956_58533_58390_-2_TTG_47	NC_005956	58390	58533	-2	TTG	141	1			BARHE0050			ORF_58390..58533_47aa_-2			47	Unknown	0		CYT	-	-	-	-	-	-	-	-	-	-	-	-				0	0	0	NA	NA	8.75911	7.92317	17.431
BHCHEMG|NC_005956_58891_58643_-1_TTG_82	NC_005956	58643	58891	-1	TTG	246	1				58643..58891(-)		ORF_58643..58825_60aa_-1			82	Unknown	1		CYT	-	-	-	-	-	-	-	-	-	-	-	TMhelix;Region of a membrane-bound protein predicted to be embedded in the membrane.				0	0	0	NA	NA	2.56116	0	3.01714
BH_RS00210|rso|ens|geno|chemg|prod|NC_005956_58671_59540_+3_TTG_289	NC_005956	58671	59540	+3	TTG	867	0	BH_RS00210	BH00430	BH00430	58671..59540(+)	NC_005956_00440	ORF_59130..59540_136aa_+3	n to n	BHPROD|MQB277_58671_59540_+3_TTG_289	289	Unknown	0	yes	SpI	G3DSA:3.40.190.10	-	PF00497;Bacterial extracellular solute-binding proteins, family 3	-	-	-	-	-	SM00062;Bacterial periplasmic substrate-binding proteins	SSF53850	-	TMhelix;Region of a membrane-bound protein predicted to be embedded in the membrane.	ABC transporter substrate binding protein	aproNOG	E	1	9	46	1.10375	0.548006	59.6746	49.6217	106.216	2.63651e-05	9.15681	4.94789	0.00569945	Cyt predominant
BH_RS00215|rso|ens|geno|+12aa_chemg|prod|NC_005956_61084_59552_-1_ATG_510	NC_005956	59552	61084	-1	ATG	1530	0	BH_RS00215	BH00440	BH00440	59552..61120(-)	NC_005956_00450	ORF_59552..61084_510aa_-1	n to n	BHPROD|MQB277_61084_59552_-3_ATG_510	510	Cytoplasmic	0	yes	CYT	G3DSA:3.40.50.300,G3DSA:3.30.230.10	PTHR32039:SF7,PTHR32039	PF13541;Subunit ChlI of Mg-chelatase,PF01078;Magnesium chelatase, subunit ChlI,PF13335;Magnesium chelatase, subunit ChlI	-	-	-	-	-	SM00382;ATPases associated with a variety of cellular activities	SSF54211,SSF52540	TIGR00368;TIGR00368: Mg chelatase-like protein	-	Mg chelatase	aproNOG	O	1	16	54	0.0356836	1	104.705	83.2298	287.282	9.94362	0	4.99989	6.49674e-06	TM exclusive
BHCHEMG|NC_005956_60039_59914_-2_GTG_41	NC_005956	59914	60039	-2	GTG	123	1				59914..60039(-)		ORF_59914..60015_33aa_-2			41	Unknown	1		CYT	-	-	-	-	-	-	-	-	-	-	-	-				0	0	0	NA	NA	0	0	0
BHCHEMG|NC_005956_60306_60569_+3_ATG_87	NC_005956	60306	60569	+3	ATG	261	0				60306..60569(+)		ORF_60306..60569_87aa_+3			87	Unknown	0		CYT	-	-	-	-	-	-	-	-	-	-	-	-				0	0	0	NA	NA	0	0	0
BH_RS00220|rso|ens|geno|+6aa_chemg|prod|NC_005956_61518_63479_+3_ATG_653	NC_005956	61518	63479	+3	ATG	1959	0	BH_RS00220	BH00450	BH00450	61500..63479(+)	NC_005956_00460	ORF_61518..63479_653aa_+3	n to n	BHPROD|MQB277_61518_63479_+3_ATG_653	653	OuterMembrane	0	yes	SpI	G3DSA:2.40.160.50	PTHR12815,PTHR12815:SF11	PF01103;Surface antigen	-	-	-	-	-	-	-	-	TMhelix;Region of a membrane-bound protein predicted to be embedded in the membrane.	surface antigen	aproNOG	M	1	123	1028	-0.243764	0.648507	4248.91	3952.65	10551.4	10	0	0	10	OM predominant
BHCHEMG|NC_005956_66984_66748_-2_TTG_78	NC_005956	66748	66984	-2	TTG	234	1				66748..66984(-)		ORF_66748..66912_54aa_-2			78	Unknown	1		CYT	-	-	-	-	-	-	-	-	-	-	-	-				0	0	0	NA	NA	0	0	0
BH_RS00225|rso|ens|geno|chemg|prod|NC_005956_63479_68125_+2_ATG_1548	NC_005956	63479	68125	+2	ATG	4644	0	BH_RS00225	BH00460	BH00460	63479..68125(+)	NC_005956_00470	ORF_63479..68125_1548aa_+2	n to n	BHPROD|MQB277_63479_68125_+2_ATG_1548	1548	CytoplasmicMembrane	0	yes	SpI	-	-	PF04357;Family of unknown function (DUF490)	-	-	-	-	-	-	-	-	TMhelix;Region of a membrane-bound protein predicted to be embedded in the membrane.	Family of unknown function (DUF490)	aproNOG	S	1	100	1016	-0.480753	0.368803	2696.48	2981.6	6622.21	10	0	9.99998	0	IM predominant
BHGENO0055|NC_005956_68275_68403_+1_TTG_42	NC_005956	68275	68403	+1	TTG	126	1			BARHE0055			ORF_68329..68403_24aa_+1			42	CytoplasmicMembrane	1		CYT	-	-	-	-	-	-	-	-	-	-	-	TMhelix;Region of a membrane-bound protein predicted to be embedded in the membrane.				0	0	0	NA	NA	385.751	247.583	942.794
BHGENO0056|NC_005956_69088_68867_-1_CTG_73	NC_005956	68867	69088	-1	CTG	219	0		BH00470(p)	BARHE0056			ORF_68867..68929_20aa_-1	p to 0		73	Unknown	0		CYT	-	-	-	-	-	-	-	-	-	-	-	-	Integrase	aproNOG	L	0	0	0	NA	NA	4.44587	0.153936	9.85189
BHCHEMG|NC_005956_69555_69385_-2_ATG_56	NC_005956	69385	69555	-2	ATG	168	1		BH00470(p)	BH00470(p)	69385..69555(-)		ORF_69385..69555_56aa_-2	p to 0	BHCHEMG|NC_005956_1904141_1904311_+2_ATG_56,BHCHEMG|NC_005956_57361_57191_-1_ATG_56	56	Unknown	0		CYT	-	-	-	-	-	-	-	-	-	-	-	-				0	0	0	NA	NA	22.8463	5.54169	48.028
BH_RS00230|rso|ens|geno|chemg|prod|NC_005956_72139_70373_-1_ATG_588	NC_005956	70373	72139	-1	ATG	1764	0	BH_RS00230	BH00480	BH00480	70373..72139(-)	NC_005956_00480	ORF_70373..72139_588aa_-1	n to n	BHPROD|MQB277_72139_70373_-3_ATG_588	588	CytoplasmicMembrane	5		SpI	G3DSA:3.40.50.300,G3DSA:1.20.1560.10	PTHR24221	PF00005;ABC transporter,PF00664;ABC transporter transmembrane region	-	-	PS00211;ABC transporters family signature.	PS50893;ATP-binding cassette, ABC transporter-type domain profile.,PS50929;ABC transporter integral membrane type-1 fused domain profile.	-	SM00382;ATPases associated with a variety of cellular activities	SSF52540,SSF90123	-	TMhelix;Region of a membrane-bound protein predicted to be embedded in the membrane.	ABC transporter	aproNOG	V	1	39	495	-0.76302	0.243005	4925.37	3766.53	13290.1	10	0	9.99997	2.23621e-09	TM exclusive
BH_RS00235|rso|ens|geno|chemg|prod|NC_005956_72880_72362_-1_ATG_172	NC_005956	72362	72880	-1	ATG	516	0	BH_RS00235	BH00490	BH00490	72362..72880(-)	NC_005956_00490	ORF_72362..72880_172aa_-1	n to n	BHPROD|MQB277_72880_72362_-3_ATG_172	172	Cytoplasmic	0		CYT	G3DSA:3.30.110.10,G3DSA:3.10.20.80	PTHR10938	PF05198;Translation initiation factor IF-3, N-terminal domain,PF00707;Translation initiation factor IF-3, C-terminal domain	-	-	-	-	-	-	SSF54364,SSF55200	TIGR00168;infC: translation initiation factor IF-3	-	IF-3 binds to the 30S ribosomal subunit and shifts the equilibrum between 70S ribosomes and their 50S and 30S subunits in favor of the free subunits, thus enhancing the availability of 30S subunits on which protein synthesis initiation begins (By similarity)	aproNOG	J	1	47	871	0.163755	0.767524	11321.2	15927.6	25348.5	0	10	4.50458	4.43245	Cyt predominant
BH_RS00240|rso|ens|geno|chemg|prod|NC_005956_73074_73853_+3_ATG_259	NC_005956	73074	73853	+3	ATG	777	0	BH_RS00240	BH00500	BH00500	73074..73853(+)	NC_005956_00500	ORF_73074..73853_259aa_+3	n to n	BHPROD|MQB277_73074_73853_+3_ATG_259	259	Cytoplasmic	0		CYT	G3DSA:3.40.50.1820	PTHR16138,PTHR16138:SF5	PF12695;Alpha/beta hydrolase family	-	-	-	-	-	-	SSF53474	-	-	Alpha beta hydrolase	aproNOG	S	1	21	356	-0.331493	0.651439	3776.38	7558.47	6169.75	0	10	9.88736	2.26243e-07	Cyt predominant
BH_RS00245|rso|ens|geno|chemg|prod|NC_005956_73890_74636_+3_ATG_248	NC_005956	73890	74636	+3	ATG	744	0	BH_RS00245	BH00510	BH00510	73890..74636(+)	NC_005956_00510	ORF_73890..74636_248aa_+3	n to n	BHPROD|MQB277_73890_74636_+3_ATG_248	248	Cytoplasmic	0		CYT	-	PTHR30399:SF1,PTHR30399	PF01863;Protein of unknown function DUF45	-	-	-	-	-	-	-	-	-	Protein of unknown function DUF45	aproNOG	S	1	11	34	1.1582	0.599715	141.958	242.68	254.36	8.22021	0	4.98583	0.00216194	TM exclusive
BH_RS00250|rso|ens|geno|chemg|prod|NC_005956_74859_76031_+3_ATG_390	NC_005956	74859	76031	+3	ATG	1170	0	BH_RS00250	BH00520	BH00520	74859..76031(+)	NC_005956_00520	ORF_74859..76031_390aa_+3	n to n	BHPROD|MQB277_74859_76031_+3_ATG_390	390	Cytoplasmic	0		CYT	G3DSA:3.30.70.360,G3DSA:3.40.630.10	PTHR11014,PTHR11014:SF76	PF07687;Peptidase dimerisation domain,PF01546;Peptidase family M20/M25/M40	-	-	PS00759;ArgE / dapE / ACY1 / CPG2 / yscS family signature 2.,PS00758;ArgE / dapE / ACY1 / CPG2 / yscS family signature 1.	-	-	-	SSF53187,SSF55031	TIGR01246;dapE_proteo: succinyl-diaminopimelate desuccinylase,TIGR01910;DapE-ArgE: peptidase, ArgE/DapE family	-	Catalyzes the hydrolysis of N-succinyl-L,L- diaminopimelic acid (SDAP), forming succinate and LL-2,6- diaminoheptanedioate (DAP), an intermediate involved in the bacterial biosynthesis of lysine and meso-diaminopimelic acid, an essential component of bacterial cell walls (By similarity)	aproNOG	E	1	13	76	0.161463	0.927166	1275.55	1566.87	2914.56	0	10	7.83685	0.000957906	Cyt predominant
BHGENO0062|+17aa_prod|NC_005956_76024_76131_+1_TTG_35	NC_005956	76024	76131	+1	TTG	105	1			BARHE0062		NC_005956_00530	ORF_75955..76131_58aa_+1			35	Unknown	0		CYT	-	-	-	-	-	-	-	-	-	-	-	-				0	0	0	NA	NA	25.1114	12.2401	64.0254
BH_RS00255|rso|ens|geno|+14aa_chemg|prod|NC_005956_77428_76229_-1_ATG_399	NC_005956	76229	77428	-1	ATG	1197	0	BH_RS00255	BH00530	BH00530	76229..77470(-)	NC_005956_00540	ORF_76229..77470_413aa_-1	n to n	BHPROD|MQB277_77428_76229_-3_ATG_399	399	Cytoplasmic	0		CYT	G3DSA:3.80.30.20	PTHR13932:SF5,PTHR13932	PF04055;Radical SAM superfamily,PF06969;HemN C-terminal domain	-	-	-	-	-	SM00729;Elongator protein 3, MiaB family, Radical SAM	SSF102114	TIGR00539;hemN_rel: putative oxygen-independent coproporphyrinogen III oxidase	-	coproporphyrinogen III oxidase	aproNOG	H	1	18	88	0.269281	0.850739	36.6961	28.4338	108.742	0.394525	0.178489	5.92874	2.22175
BH_RS00260|rso|ens|geno|chemg|prod|NC_005956_78072_77425_-2_ATG_215	NC_005956	77425	78072	-2	ATG	645	0	BH_RS00260	BH00540	BH00540	77425..78072(-)	NC_005956_00550	ORF_77425..78072_215aa_-2	n to n	BHPROD|MQB277_78072_77425_-1_ATG_215	215	Cytoplasmic	0		CYT	G3DSA:3.90.950.10	PTHR11067:SF9,PTHR11067	PF01725;Ham1 family	-	-	-	-	-	-	SSF52972	TIGR00042;TIGR00042: non-canonical purine NTP pyrophosphatase, RdgB/HAM1 family	-	Pyrophosphatase that hydrolyzes non-canonical purine nucleotides such as XTP and ITP dITP to their respective monophosphate derivatives. Might exclude non-canonical purines from DNA precursor pool, thus preventing their incorporation into DNA and avoiding chromosomal lesions (By similarity)	aproNOG	F	1	11	100	-0.118644	0.942745	418.097	439.439	1125.37	4.54348	0.00123544	9.07329	2.12142e-05	IM predominant
BHCHEMG|NC_005956_77279_77479_+2_ATG_66	NC_005956	77279	77479	+2	ATG	198	1				77279..77479(+)		ORF_77279..77479_66aa_+2			66	Unknown	0		CYT	-	-	-	-	-	-	-	-	-	-	-	-				0	0	0	NA	NA	0	0	0
BH_RS00265|rso|ens|geno|+1aa_chemg|prod|NC_005956_78383_79453_+2_ATG_356	NC_005956	78383	79453	+2	ATG	1068	0	BH_RS00265	BH00550	BH00550	78380..79453(+)	NC_005956_00560	ORF_78383..79453_356aa_+2	n to n	BHPROD|MQB277_78383_79453_+2_ATG_356	356	Cytoplasmic	0		CYT	G3DSA:1.10.10.10,G3DSA:3.30.450.40	-	PF01628;HrcA protein C terminal domain	PIRSF005485	-	-	-	-	-	SSF55781,SSF46785	TIGR00331;hrcA: heat-inducible transcription repressor HrcA	-	Negative regulator of class I heat shock genes (grpE- dnaK-dnaJ and groELS operons). Prevents heat-shock induction of these operons (By similarity)	aproNOG	K	1	37	508	0.15844	0.807356	2584.34	4945.96	4828.23	1.62464	1.24345e-13	9.99966	9.29618e-05
BH_RS00270|rso|ens|geno|chemg|prod|NC_005956_79589_80251_+2_ATG_220	NC_005956	79589	80251	+2	ATG	660	0	BH_RS00270	BH00560	BH00560	79589..80251(+)	NC_005956_00570	ORF_79589..80251_220aa_+2	n to n	BHPROD|MQB277_79589_80251_+2_ATG_220	220	Cytoplasmic	0		CYT	G3DSA:2.30.22.10,G3DSA:3.90.20.20	PTHR21237:SF21,PTHR21237	PF01025;GrpE	-	PR00773;GrpE protein signature	PS01071;grpE protein signature.	-	-	-	SSF58014,SSF51064	-	-	Participates actively in the response to hyperosmotic and heat shock by preventing the aggregation of stress-denatured proteins, in association with DnaK and GrpE. It is the nucleotide exchange factor for DnaK and may function as a thermosensor. Unfolded proteins bind initially to DnaJ	aproNOG	O	1	64	1407	0.554527	0.262275	1368.33	2489.05	2013.77	0	10	5.56704	4.11872	Cyt predominant
BH_RS00275|rso|ens|geno|+34aa_chemg|prod|NC_005956_80918_80379_-3_ATG_179	NC_005956	80379	80918	-3	ATG	537	0	BH_RS00275	BH00570	BH00570	80379..81020(-)	NC_005956_00580	ORF_80379..80918_179aa_-3	n to n	BHPROD|MQB277_80918_80379_-2_ATG_179	179	Unknown	0		CYT	G3DSA:3.90.1140.10	-	PF02834;LigT like Phosphoesterase	-	-	-	-	-	-	SSF55144	TIGR02258;2_5_ligase: 2'-5' RNA ligase	-	2'-5' RNA ligase	aproNOG	J	1	14	147	0.28944	0.785857	365.626	633.043	604.356	3.93828e-06	2.73357	4.99844	0.000112697
BHGENO0068|NC_005956_81174_81037_-2_CTG_45	NC_005956	81037	81174	-2	CTG	135	1			BARHE0068			ORF_81037..81174_45aa_-2			45	Unknown	1		CYT	-	-	-	-	-	-	-	-	-	-	-	TMhelix;Region of a membrane-bound protein predicted to be embedded in the membrane.				0	0	0	NA	NA	103.544	60.3107	232.076
BHCHEMG|NC_005956_81250_81414_+1_ATG_54	NC_005956	81250	81414	+1	ATG	162	1				81250..81414(+)		ORF_81250..81414_54aa_+1			54	Unknown	0		CYT	-	-	-	-	-	-	-	-	-	-	-	-				0	0	0	NA	NA	42.1724	28.4835	98.7881
BH_RS00280|-23aa_rso|chemg|prod|NC_005956_81811_81512_-1_ATG_99	NC_005956	81512	81811	-1	ATG	297	0	BH_RS00280	BH00580	BH00580	81512..81811(-)	NC_005956_00590	ORF_81512..81811_99aa_-1	n to n	BHPROD|MQB277_81811_81512_-3_ATG_99	99	Cytoplasmic	0		CYT	G3DSA:3.30.1340.10	-	PF00381;PTS HPr component phosphorylation site	-	PR00107;Phosphocarrier protein signature	PS00369;PTS HPR domain histidine phosphorylation site signature.	PS51350;PTS HPR domain profile.	-	-	SSF55594	TIGR01003;PTS_HPr_family: phosphocarrier, HPr family	-	phosphocarrier protein HPr	aproNOG	G	0	0	0	NA	NA	2.74221	4.05415	3.84078
BH_RS00285|rso|ens|geno|+45aa_chemg|prod|NC_005956_82225_81827_-1_ATG_132	NC_005956	81827	82225	-1	ATG	396	0	BH_RS00285	BH00590	BH00590	81827..82360(-)	NC_005956_00600	ORF_81827..82225_132aa_-1	n to n	BHPROD|MQB277_82225_81827_-3_ATG_132	132	Cytoplasmic	0		CYT	G3DSA:3.40.50.510	-	PF03610;PTS system fructose IIA component	-	-	-	PS51096;PTS_EIIA type-4 domain profile.	-	-	SSF53062	-	-	PTS system fructose subfamily IIA component	aproNOG	G	0	1	1	NA	NA	321.039	122.122	883.592
BHCHEMG|NC_005956_81540_82052_+3_ATG_170	NC_005956	81540	82052	+3	ATG	510	0				81540..82052(+)		ORF_81540..82052_170aa_+3			170	Unknown	0		CYT	-	-	-	-	-	-	-	-	-	-	-	-				0	0	0	NA	NA	0	0	0
BH_RS00290|rso|ens|geno|chemg|prod|NC_005956_82817_82353_-3_ATG_154	NC_005956	82353	82817	-3	ATG	462	0	BH_RS00290	BH00600	BH00600	82353..82817(-)	NC_005956_00610	ORF_82353..82817_154aa_-3	n to n	BHPROD|MQB277_82817_82353_-2_ATG_154	154	Unknown	0		CYT	G3DSA:3.40.50.300	-	PF07475;HPr Serine kinase C-terminal domain	-	-	-	-	-	-	SSF53795	-	-	HPr Serine kinase C-terminal domain	aproNOG	T	1	11	58	1.73641	0.274282	33.2513	36.2465	61.1627	9.80973	4.76837e-06	6.13624	1.44457	IM predominant
BH_RS00295|rso|ens|geno|chemg|prod|NC_005956_84625_82841_-1_ATG_594	NC_005956	82841	84625	-1	ATG	1782	0	BH_RS00295	BH00610	BH00610	82841..84625(-)	NC_005956_00620	ORF_82841..84625_594aa_-1	n to n		594	CytoplasmicMembrane	2		CYT	G3DSA:3.30.565.10,G3DSA:1.10.287.130	PTHR24423,PTHR24423:SF407	PF13756;Stimulus-sensing domain,PF00512;His Kinase A (phospho-acceptor) domain,PF13755;Sensor N-terminal transmembrane domain,PF00672;HAMP domain,PF02518;Histidine kinase-, DNA gyrase B-, and HSP90-like ATPase	-	PR00344;Bacterial sensor protein C-terminal signature	-	PS50885;HAMP domain profile.,PS50109;Histidine kinase domain profile.	-	SM00388;His Kinase A (phosphoacceptor) domain,SM00387;Histidine kinase-like ATPases,SM00304;HAMP (Histidine kinases, Adenylyl cyclases, Methyl binding proteins, Phosphatases) domain	SSF47384,SSF55874	-	TMhelix;Region of a membrane-bound protein predicted to be embedded in the membrane.	Histidine kinase	aproNOG	T	0	0	0	NA	NA	0.697992	0.44898	1.12245
BHCHEMG|NC_005956_84108_83893_-2_GTG_71	NC_005956	83893	84108	-2	GTG	213	1				83893..84108(-)		ORF_83893..84156_87aa_-2			71	Unknown	0		CYT	-	-	-	-	-	-	-	-	-	-	-	-				0	0	0	NA	NA	0	0	0
BHGENO0074|NC_005956_85361_85459_+2_TTG_32	NC_005956	85361	85459	+2	TTG	96	1			BARHE0074			ORF_85361..85459_32aa_+2			32	CytoplasmicMembrane	1		CYT	-	-	-	-	-	-	-	-	-	-	-	TMhelix;Region of a membrane-bound protein predicted to be embedded in the membrane.				0	0	0	NA	NA	5391.72	607.119	24993.7
BH_RS00305|rso|ens|geno|+17aa_chemg|prod|NC_005956_85828_86283_+1_ATG_151	NC_005956	85828	86283	+1	ATG	453	0	BH_RS00305	BH00630	BH00630	85777..86283(+)	NC_005956_00640	ORF_85828..86283_151aa_+1	n to n	BHPROD|MQB277_83323_83778_+1_ATG_151	151	Unknown	0		CYT	G3DSA:3.10.350.10,G3DSA:1.10.8.250	-	PF04972;BON domain,PF01476;LysM domain	-	-	-	PS50914;BON domain profile.	-	SM00257;Lysin motif	SSF54106	-	-	LysM domain BON superfamily protein	aproNOG	S	1	69	1675	-0.212594	0.66218	538.783	768.062	850.556	1.90781e-12	1.33129e-10	0.0251685	9.95983
BH_RS00310|rso|ens|geno|chemg|prod|NC_005956_86972_86412_-3_ATG_186	NC_005956	86412	86972	-3	ATG	558	0	BH_RS00310	BH00640	BH00640	86412..86972(-)	NC_005956_00650	ORF_86412..86972_186aa_-3	n to n	BHPROD|MQB277_84467_83907_-2_ATG_186	186	Unknown	0		CYT	-	-	PF04314;Protein of unknown function (DUF461)	-	-	-	-	-	-	SSF110087	-	-	Protein of unknown function (DUF461)	aproNOG	S	1	20	443	-1.02885	0.131755	329.384	382.641	684.795	0	10	9.56043	0.0768943	Cyt predominant
BHORF|NC_005956_88979_89125_+2_ATG_48	NC_005956	88979	89125	+2	ATG	144	1						ORF_88979..89125_48aa_+2			48	Unknown	0		CYT	-	-	-	-	-	-	-	-	-	-	-	-				0	1	1	NA	NA	0	0	0
BH_RS00315|rso|ens|geno|+7aa_chemg|prod|NC_005956_87832_89724_+1_ATG_630	NC_005956	87832	89724	+1	ATG	1890	0	BH_RS00315	BH00650	BH00650	87811..89724(+)	NC_005956_00660	ORF_87832..89724_630aa_+1	n to n	BHPROD|MQB277_85327_87219_+1_ATG_630	630	Cytoplasmic	0		CYT	G3DSA:3.30.420.40,G3DSA:3.90.640.10,G3DSA:2.60.34.10,G3DSA:3.30.30.30,G3DSA:1.20.1270.10	PTHR19375:SF173,PTHR19375	PF00012;Hsp70 protein	-	PR00301;70kDa heat shock protein signature	PS00297;Heat shock hsp70 proteins family signature 1.,PS00329;Heat shock hsp70 proteins family signature 2.,PS01036;Heat shock hsp70 proteins family signature 3.	-	-	-	SSF53067,SSF100920,SSF100934	TIGR02350;prok_dnaK: chaperone protein DnaK	-	Acts as a chaperone (By similarity)	aproNOG	O	1	265	8659	0.818948	0.0501907	9913.23	14142.8	17029.9	0	10	9.41285	0.502175	Cyt predominant
BHCHEMG|NC_005956_89947_90246_+1_CTG_99	NC_005956	89947	90246	+1	CTG	297	1				89947..90246(+)		ORF_89989..90246_85aa_+1			99	CytoplasmicMembrane	1		CYT	-	-	-	-	-	-	-	-	-	-	-	-				0	0	0	NA	NA	0	0	0
BH_RS00320|rso|ens|geno|+1aa_chemg|prod|NC_005956_89883_91028_+3_ATG_381	NC_005956	89883	91028	+3	ATG	1143	0	BH_RS00320	BH00660	BH00660	89880..91028(+)	NC_005956_00670	ORF_89880..91028_382aa_+3	n to n	BHPROD|MQB277_87378_88523_+3_ATG_381	381	Cytoplasmic	0		CYT	G3DSA:2.60.260.20,G3DSA:1.10.287.110,G3DSA:2.10.230.10	PTHR24076:SF78,PTHR24076	PF01556;DnaJ C terminal domain,PF00226;DnaJ domain,PF00684;DnaJ central domain	-	PR00625;DnaJ domain signature	PS00636;Nt-dnaJ domain signature.	PS50076;dnaJ domain profile.,PS51188;Zinc finger CR-type profile.	-	SM00271;DnaJ molecular chaperone homology domain	SSF57938,SSF49493,SSF46565	TIGR02349;DnaJ_bact: chaperone protein DnaJ	-	ATP binding to DnaK triggers the release of the substrate protein, thus completing the reaction cycle. Several rounds of ATP-dependent interactions between DnaJ, DnaK and GrpE are required for fully efficient folding. Also involved, together with DnaK and GrpE, in the DNA replication of plasmids through activation of initiation proteins (By similarity)	aproNOG	O	1	53	1273	0.159171	0.754414	1631.76	2285.68	3780.3	10	0	10	2.48728e-07	IM predominant
BHGENOBH00670_fCDS1_p|NC_005956_92098_92193_+1_ATG_31	NC_005956	92098	92193	+1	ATG	93	1	BH_RS08420(p)	BH00670(p)	BH00670(p)			ORF_92098..92193_31aa_+1	p to p	BH_RS08420_p|-164aa_geno_fCDS3_p|NC_005956_92128_92833_+1_ATG_235	31	Unknown	0		CYT	-	-	-	-	-	-	-	-	-	-	-	-				0	0	0	NA	NA	10.1713	6.46531	24.8666
BHGENOBH00670-2_fCDS2_p|NC_005956_92351_92551_+2_GTG_66	NC_005956	92351	92551	+2	GTG	198	0	BH_RS08420(p)	BH00670(p)	BH00670-2(p)			ORF_92351..92551_66aa_+2	p to p		66	Unknown	0		CYT	-	-	-	-	-	-	-	-	-	-	-	-	Integrase	aproNOG	L	0	0	0	NA	NA	0	0	0
BH_RS08420_p|-164aa_geno_fCDS3_p|NC_005956_92128_92833_+1_ATG_235	NC_005956	92128	92833	+1	ATG	703	6	BH_RS08420(p)	BH00670(p)	BH00670-3(p)			ORF_92708..92833_41aa_+2	p to p	BHGENOBH00670_fCDS1_p|NC_005956_92098_92193_+1_ATG_31	235	Unknown	0		CYT	-	-	-	-	-	-	-	-	-	-	-	-				0	0	0	NA	NA	278.548	181.446	534.952
BHRSO00680_p|ens_p|-50aa_geno_fCDS1_p|NC_005956_93272_92964_-3_GCT_103	NC_005956	92964	93272	-3	GCT	306	6		BH00680(p)	BH00680(p)				p to 0		103	Unknown	0		CYT	-	-	-	-	-	-	-	-	-	-	-	-				0	0	0	NA	NA	147.881	99.6735	305.755
BHGENOBH00680-2_fCDS2_p|NC_005956_93274_93119_-1_ATG_51	NC_005956	93119	93274	-1	ATG	153	1		BH00680(p)	BH00680-2(p)			ORF_93119..93274_51aa_-1	p to 0		51	Unknown	0		CYT	-	-	-	-	-	-	-	-	-	-	-	-				0	0	0	NA	NA	0	0	0
BH_RS00330|rso|ens|geno|chemg|prod|NC_005956_94170_95075_+3_ATG_301	NC_005956	94170	95075	+3	ATG	903	0	BH_RS00330	BH00690	BH00690	94170..95075(+)	NC_005956_00680	ORF_94170..95075_301aa_+3	n to n	BHPROD|MQB277_91665_92570_+3_ATG_301	301	Cytoplasmic	0		CYT	G3DSA:3.40.1160.10	PTHR23342	PF00696;Amino acid kinase family	PIRSF000728	PR00474;Glutamate 5-kinase family signature	-	-	-	-	SSF53633	TIGR00761;argB: acetylglutamate kinase	-	NAG kinase	aproNOG	E	1	38	573	0.0454039	0.94656	221.257	268.986	559.201	0.262307	1.25233e-12	9.99387	0.00204437
BH_RS00335|+4aa_rso|+23aa_chemg|prod|NC_005956_95110_96018_+1_ATG_302	NC_005956	95110	96018	+1	ATG	906	1	BH_RS00335	BH00700	BH00700	95041..96018(+)	NC_005956_00690	ORF_95098..96018_306aa_+1	n to n	BHPROD|MQB277_92605_93513_+1_ATG_302	302	CytoplasmicMembrane	10		TMH	-	PTHR12715,PTHR12715:SF8	PF00892;EamA-like transporter family	-	-	-	-	-	-	SSF103481	-	TMhelix;Region of a membrane-bound protein predicted to be embedded in the membrane.	EamA-like transporter family	aproNOG	EG	1	4	76	0.466318	0.750284	63.9592	64.7424	158.329	5.25697	0.0025413	8.82687	0.255175	IM predominant
BHGENO0084|+9aa_chemg|NC_005956_96319_96453_+1_ATG_44	NC_005956	96319	96453	+1	ATG	132	1			BARHE0084	96292..96453(+)		ORF_96319..96453_44aa_+1			44	CytoplasmicMembrane	1		TMH	-	-	-	-	-	-	-	-	-	-	-	-				0	0	0	NA	NA	57.0993	75.843	138.009
BH_RS00340|rso|ens|geno|chemg|prod|NC_005956_96596_98401_+2_ATG_601	NC_005956	96596	98401	+2	ATG	1803	0	BH_RS00340	BH00710	BH00710	96596..98401(+)	NC_005956_00700	ORF_96596..98401_601aa_+2	n to n	BHPROD|MQB277_94091_95896_+2_ATG_601	601	CytoplasmicMembrane	0		CYT	G3DSA:3.40.50.300,G3DSA:2.40.30.10,G3DSA:3.30.70.870,G3DSA:3.30.70.240	PTHR23115:SF127,PTHR23115	PF06421;GTP-binding protein LepA C-terminus,PF00679;Elongation factor G C-terminus,PF03144;Elongation factor Tu domain 2,PF00009;Elongation factor Tu GTP binding domain	-	PR00315;GTP-binding elongation factor signature	PS00301;Translational (tr)-type guanine nucleotide-binding (G) domain signature.	PS51722;Translational (tr)-type guanine nucleotide-binding (G) domain profile.	-	-	SSF52540,SSF54980	TIGR00231;small_GTP: small GTP-binding protein domain,TIGR01393;lepA: elongation factor 4	-	Required for accurate and efficient protein synthesis under certain stress conditions. May act as a fidelity factor of the translation reaction, by catalyzing a one-codon backward translocation of tRNAs on improperly translocated ribosomes. Back- translocation proceeds from a post-translocation (POST) complex to a pre-translocation (PRE) complex, thus giving elongation factor G a second chance to…	aproNOG	M	1	32	239	0.212135	0.805645	1388.46	1367.07	3667.79	8.58608	5.0415e-10	8.58785	4.4729e-07	IM predominant
BH_RS00345|rso|ens|geno|+25aa_chemg|prod|NC_005956_99325_98477_-1_ATG_282	NC_005956	98477	99325	-1	ATG	846	0	BH_RS00345	BH00720	BH00720	98477..99400(-)	NC_005956_00710	ORF_98477..99325_282aa_-1	n to n	BHPROD|MQB277_96820_95972_-3_ATG_282	282	Cytoplasmic	0		CYT	G3DSA:2.160.10.10,G3DSA:1.10.166.10	PTHR19136:SF52,PTHR19136	PF14602;Hexapeptide repeat of succinyl-transferase,PF00132;Bacterial transferase hexapeptide (six repeats),PF14805;Tetrahydrodipicolinate N-succinyltransferase N-terminal	-	-	PS00101;Hexapeptide-repeat containing-transferases signature.	-	-	-	SSF51161	TIGR00965;dapD: 2,3,4,5-tetrahydropyridine-2,6-dicarboxylate N-succinyltransferase	-	Tetrahydrodipicolinate N-succinyltransferase	aproNOG	E	1	19	178	0.0748931	0.948827	34.0502	32.0856	77.3026	0	10	4.98001	0.00603982	Cyt predominant
BH_RS00350|rso|ens|geno|+22aa_chemg|prod|NC_005956_99433_100296_+1_ATG_287	NC_005956	99433	100296	+1	ATG	861	0	BH_RS00350	BH00730	BH00730	99367..100296(+)	NC_005956_00720	ORF_99391..100296_301aa_+1	n to n	BHPROD|MQB277_96928_97791_+1_ATG_287	287	Cytoplasmic	0		CYT	G3DSA:3.40.50.450	PTHR31223:SF1,PTHR31223	PF03641;Possible lysine decarboxylase	-	-	-	-	-	-	SSF102405	-	-	decarboxylase family	aproNOG	S	1	4	10	0.466318	0.968531	51.0257	42.6753	128.453	0.00244141	8.90625	3.7995	0	Cyt predominant
BH_RS00355|rso|ens|geno|+22aa_chemg|prod|NC_005956_101072_100329_-3_ATG_247	NC_005956	100329	101072	-3	ATG	741	0	BH_RS00355	BH00740	BH00740	100329..101138(-)	NC_005956_00730	ORF_100329..101072_247aa_-3	n to n	BHPROD|MQB277_98567_97824_-2_ATG_247	247	Cytoplasmic	0		CYT	G3DSA:3.30.70.580,G3DSA:3.30.70.660	PTHR11142:SF0,PTHR11142	PF01416;tRNA pseudouridine synthase	PIRSF001430	-	-	-	-	-	SSF55120	TIGR00071;hisT_truA: tRNA pseudouridine(38-40) synthase	-	Formation of pseudouridine at positions 38, 39 and 40 in the anticodon stem and loop of transfer RNAs (By similarity)	aproNOG	J	1	6	21	0.328814	0.944363	65.8622	53.3329	184.973	1.65726	0.898438	4.93079	0	IM exclusive
BH_RS00360|rso|ens|geno|chemg|prod|NC_005956_102009_101074_-2_ATG_311	NC_005956	101074	102009	-2	ATG	933	0	BH_RS00360	BH00750	BH00750	101074..102009(-)	NC_005956_00740	ORF_101074..102009_311aa_-2	n to n	BHPROD|MQB277_99504_98569_-1_ATG_311	311	Cytoplasmic	0		CYT	G3DSA:3.40.50.170,G3DSA:3.10.25.10	PTHR11138:SF0,PTHR11138	PF02911;Formyl transferase, C-terminal domain,PF00551;Formyl transferase	-	-	PS00373;Phosphoribosylglycinamide formyltransferase active site.	-	-	-	SSF50486,SSF53328	TIGR00460;fmt: methionyl-tRNA formyltransferase	-	Modifies the free amino group of the aminoacyl moiety of methionyl-tRNA(fMet). The formyl group appears to play a dual role in the initiator identity of N-formylmethionyl-tRNA by (I) promoting its recognition by IF2 and (II) impairing its binding to EFTu-GTP (By similarity)	aproNOG	J	1	13	101	0.150816	0.917372	118.716	103.785	317.934	1.28981e-10	9.96029	5.94993	1.05217e-05	Cyt predominant
BH_RS00365|rso|ens|geno|+12aa_chemg|-2aa_prod|NC_005956_102539_102009_-3_ATG_176	NC_005956	102009	102539	-3	ATG	528	0	BH_RS00365	BH00760	BH00760	102009..102575(-)	NC_005956_00750	ORF_102009..102539_176aa_-3	n to n	BHPROD_+2aa_orf|MQB277_100034_99504_-2_ATG_176,BHPROD|MQB277_100028_99504_-2_ATG_174	176	Cytoplasmic	0		CYT	G3DSA:3.90.45.10	PTHR10458,PTHR10458:SF3	PF01327;Polypeptide deformylase	PIRSF004749	PR01576;Peptide deformylase signature	-	-	-	-	SSF56420	TIGR00079;pept_deformyl: peptide deformylase	-	Removes the formyl group from the N-terminal Met of newly synthesized proteins. Requires at least a dipeptide for an efficient rate of reaction. N-terminal L-methionine is a prerequisite for activity but the enzyme has broad specificity at other positions (By similarity)	aproNOG	J	1	10	94	0.0959496	0.957255	46.5944	43.6729	133.481	9.98232	2.9555e-11	5.82582	2.15264	TM predominant
BH_RS00370|rso|ens|geno|+49aa_chemg|+31aa_prod|NC_005956_102631_103815_+1_ATG_394	NC_005956	102631	103815	+1	ATG	1182	0	BH_RS00370	BH00770	BH00770	102484..103815(+)	NC_005956_00760	ORF_102538..103815_425aa_+1	n to n	BHPROD|MQB277_100033_101310_+1_ATG_425	394	CytoplasmicMembrane	1		TMH	-	PTHR30563	PF02646;RmuC family	-	-	-	-	-	-	-	-	TMhelix;Region of a membrane-bound protein predicted to be embedded in the membrane.	RmuC domain protein	aproNOG	S	1	27	252	-0.533682	0.523337	841.638	871.301	1594.1	10	0	8.25661	1.49526e-10	TM exclusive
BH_RS00375|rso|ens|geno|prod|NC_005956_103924_104511_+1_ATG_195	NC_005956	103924	104511	+1	ATG	585	0	BH_RS00375	BH00780	BH00780		NC_005956_00770	ORF_103924..104511_195aa_+1	n to n	BHPROD|MQB277_101419_102006_+1_ATG_195	195	CytoplasmicMembrane	0	yes	SpII	G3DSA:1.10.530.10	-	-	-	-	-	PS51257;Prokaryotic membrane lipoprotein lipid attachment site profile.	-	-	SSF53955	-	-	Lipoprotein	aproNOG	S	1	17	140	-0.70733	0.51562	1052.29	2021.07	1719.51	9.99925	0	8.2156	0.0192238	TM exclusive
BHCHEMG|NC_005956_105209_105009_-3_ATG_66	NC_005956	105009	105209	-3	ATG	198	1				105009..105209(-)		ORF_105009..105209_66aa_-3			66	Unknown	1		CYT	-	-	-	-	-	-	-	-	-	-	-	TMhelix;Region of a membrane-bound protein predicted to be embedded in the membrane.				0	0	0	NA	NA	202.364	216.006	330.922
BH_RS00380|rso|ens|geno|chemg|prod|NC_005956_105538_105287_-1_ATG_83	NC_005956	105287	105538	-1	ATG	249	0	BH_RS00380	BH00790	BH00790	105287..105538(-)	NC_005956_00780	ORF_105287..105538_83aa_-1	n to n	BHPROD|MQB277_103033_102782_-3_ATG_83	83	Unknown	0		CYT	-	-	PF06620;Protein of unknown function (DUF1150)	-	-	-	-	-	-	-	-	-	Protein of unknown function (DUF1150)	aproNOG	S	1	8	72	0.546488	0.713826	2822.7	4038.12	5426.62	0.0146149	3.03796	7.33465	0	IM exclusive
BH_RS00385|rso|ens|geno|chemg|prod|NC_005956_105986_105558_-3_ATG_142	NC_005956	105558	105986	-3	ATG	426	0	BH_RS00385	BH00800	BH00800	105558..105986(-)	NC_005956_00790	ORF_105558..105986_142aa_-3	n to n	BHPROD|MQB277_103481_103053_-2_ATG_142	142	Cytoplasmic	0		CYT	G3DSA:2.60.40.790	PTHR11527	PF00011;Hsp20/alpha crystallin family	-	-	-	PS01031;Heat shock hsp20 proteins family profile.	-	-	SSF49764	-	-	Heat Shock Protein	aproNOG	O	1	21	382	0.436103	0.531325	3534.24	3484.61	6948.3	9.99954	0	5.94829	0.000736233	IM predominant
BH_RS00390|rso|ens|geno|chemg|prod|NC_005956_106095_106835_+3_ATG_246	NC_005956	106095	106835	+3	ATG	738	0	BH_RS00390	BH00810	BH00810	106095..106835(+)	NC_005956_00800	ORF_106095..106835_246aa_+3	n to n	BHPROD|MQB277_103590_104330_+3_ATG_246	246	Cytoplasmic	1		CYT	G3DSA:1.10.1670.10,G3DSA:1.10.340.30	PTHR10359,PTHR10359:SF20	PF00730;HhH-GPD superfamily base excision DNA repair protein,PF00633;Helix-hairpin-helix motif	-	-	PS01155;Endonuclease III family signature.	-	-	SM00525;Target=BH_RS00390|rso|ens|geno|chemg|prod|NC_005956_106095_106835_+3_ATG_246 204 224,SM00478;endonuclease III	SSF48150	TIGR01083;nth: endonuclease III	-	endonuclease III	aproNOG	L	1	2	2	NA	NA	248.058	115.995	730.833	2.5	0	1.5	0	IM exclusive
BH_RS00395|rso|ens|geno|prod|NC_005956_106984_107187_+1_ATG_67	NC_005956	106984	107187	+1	ATG	201	0	BH_RS00395	BH00820	BH00820		NC_005956_00810	ORF_106960..107187_75aa_+1	n to n	BHPROD|MQB277_104479_104682_+1_ATG_67	67	Unknown	0		CYT	-	-	PF01632;Ribosomal protein L35	-	PR00064;Ribosomal protein L35 signature	PS00936;Ribosomal protein L35 signature.	-	-	-	SSF143034	TIGR00001;rpmI_bact: ribosomal protein bL35	-	50S ribosomal protein L35	aproNOG	J	1	21	335	0.198546	0.791251	4467.64	2381.84	11752	1.12607e-10	4.3622	0.329209	9.4155
BH_RS00400|rso|ens|geno|chemg|prod|NC_005956_107221_107622_+1_ATG_133	NC_005956	107221	107622	+1	ATG	399	0	BH_RS00400	BH00830	BH00830	107221..107622(+)	NC_005956_00820	ORF_107221..107622_133aa_+1	n to n	BHPROD|MQB277_104716_105117_+1_ATG_133	133	Cytoplasmic	0		CYT	G3DSA:1.10.1900.20	PTHR10986:SF13,PTHR10986	PF00453;Ribosomal protein L20	-	PR00062;Ribosomal protein L20 signature	PS00937;Ribosomal protein L20 signature.	-	-	-	SSF74731	TIGR01032;rplT_bact: ribosomal protein bL20	-	Binds directly to 23S ribosomal RNA and is necessary for the in vitro assembly process of the 50S ribosomal subunit. It is not involved in the protein synthesizing functions of that subunit (By similarity)	aproNOG	J	1	54	1072	0.0599124	0.911948	1897.55	1617.34	4138.81	0.00716916	0	0.0255775	9.96216
BH_RS00405|rso|ens|geno|+16aa_chemg|prod|NC_005956_107716_108801_+1_ATG_361	NC_005956	107716	108801	+1	ATG	1083	0	BH_RS00405	BH00840	BH00840	107668..108801(+)	NC_005956_00830	ORF_107716..108801_361aa_+1	n to n	BHPROD|MQB277_105211_106296_+1_ATG_361	361	Cytoplasmic	0		CYT	G3DSA:3.30.930.10	PTHR11538	PF02912;Aminoacyl tRNA synthetase class II, N-terminal domain,PF01409;tRNA synthetases class II core domain (F)	-	-	-	PS50862;Aminoacyl-transfer RNA synthetases class-II family profile.	-	-	SSF46589,SSF55681	TIGR00468;pheS: phenylalanine--tRNA ligase, alpha subunit	-	Phenylalanyl-tRNA synthetase alpha subunit	aproNOG	J	1	28	188	0.527719	0.565762	333.885	280.608	734.845	0	10	9.24788	0.000370111	Cyt predominant
BHCHEMG|NC_005956_110562_110419_-2_ATG_47	NC_005956	110419	110562	-2	ATG	141	0				110419..110562(-)		ORF_110419..110562_47aa_-2			47	Unknown	0		CYT	-	-	-	-	-	-	-	-	-	-	-	-				0	0	0	NA	NA	0	0	0
BHCHEMG|NC_005956_110487_110714_+3_CTG_75	NC_005956	110487	110714	+3	CTG	225	1				110487..110714(+)		ORF_110514..110714_66aa_+3			75	CytoplasmicMembrane	1		TMH	-	-	-	-	-	-	-	-	-	-	-	TMhelix;Region of a membrane-bound protein predicted to be embedded in the membrane.				0	0	0	NA	NA	0	0	0
BH_RS00410|rso|ens|geno|chemg|prod|NC_005956_108833_111247_+2_ATG_804	NC_005956	108833	111247	+2	ATG	2412	0	BH_RS00410	BH00850	BH00850	108833..111247(+)	NC_005956_00840	ORF_108833..111247_804aa_+2	n to n	BHPROD|MQB277_106328_108742_+2_ATG_804	804	Cytoplasmic	0		CYT	G3DSA:3.30.930.10,G3DSA:3.30.56.20,G3DSA:3.30.70.380,G3DSA:3.30.56.10,G3DSA:3.50.40.10,G3DSA:2.40.50.140	PTHR10947:SF0,PTHR10947	PF01588;Putative tRNA binding domain,PF03483;B3/4 domain,PF03484;tRNA synthetase B5 domain,PF03147;Ferredoxin-fold anticodon binding domain	-	-	-	PS50886;tRNA-binding domain profile.,PS51447;Ferredoxin-fold anticodon binding (FDX-ACB) domain profile.,PS51483;B5 domain profile.	-	SM00896;Ferredoxin-fold anticodon binding domain,SM00873;B3/4 domain,SM00874;tRNA synthetase B5 domain	SSF46955,SSF55681,SSF54991,SSF50249,SSF56037	TIGR00472;pheT_bact: phenylalanine--tRNA ligase, beta subunit	-	Phenylalanyl-tRNA synthetase, beta subunit	aproNOG	J	1	49	408	0.678863	0.315289	108.764	124.033	261.513	1.81153e-11	0.181406	9.99101	1.01929e-06
BHCHEMG|NC_005956_112635_112408_-2_ATG_75	NC_005956	112408	112635	-2	ATG	225	0				112408..112635(-)		ORF_112408..112635_75aa_-2			75	Unknown	0		CYT	-	-	-	-	-	-	-	-	-	-	-	-	Protein of unknown function (DUF1602)	proNOG	S	0	0	0	NA	NA	0	0	0
BH_RS00415|rso|ens|geno|+19aa_chemg|prod|NC_005956_111537_112445_+3_ATG_302	NC_005956	111537	112445	+3	ATG	906	0	BH_RS00415	BH00860	BH00860	111480..112445(+)	NC_005956_00850	ORF_111480..112445_321aa_+3	n to n	BHPROD|MQB277_109032_109940_+3_ATG_302	302	Periplasmic	0	yes	SpII	G3DSA:3.40.50.1980	PTHR30477:SF1,PTHR30477	PF01297;Periplasmic solute binding protein family	-	PR00691;Adhesin B signature,PR00690;Adhesin family signature	-	-	-	-	SSF53807	-	TMhelix;Region of a membrane-bound protein predicted to be embedded in the membrane.	Zinc manganese iron ABC transporter, periplasmic zinc manganese iron-binding protein	aproNOG	P	1	12	99	1.02703	0.397919	374.395	187.407	888.543	0	10	4.15965	0	Cyt predominant
BH_RS00420|rso|ens|geno|chemg|prod|NC_005956_112442_113272_+2_ATG_276	NC_005956	112442	113272	+2	ATG	828	0	BH_RS00420	BH00870	BH00870	112442..113272(+)	NC_005956_00860	ORF_112442..113272_276aa_+2	n to n	BHPROD|MQB277_109937_110767_+2_ATG_276	276	CytoplasmicMembrane	0		CYT	G3DSA:3.40.50.300	PTHR24220,PTHR24220:SF218	PF00005;ABC transporter	-	-	PS00211;ABC transporters family signature.	PS50893;ATP-binding cassette, ABC transporter-type domain profile.	-	SM00382;ATPases associated with a variety of cellular activities	SSF52540	-	-	ABC transporter	aproNOG	P	1	8	33	-0.15517	0.978325	402.881	323.265	798.061	9.68324	0	4.97961	0.00195491	TM exclusive
BH_RS00425|-1aa_rso|NC_005956_113269_114123_+1_ATA_284	NC_005956	113269	114123	+1	ATA	852	0	BH_RS00425	BH00880	BH00880	113272..114123(+)	NC_005956_00870	ORF_113272..114123_283aa_+1	n to n	BHPROD|MQB277_110767_111618_+1_ATG_283	284	CytoplasmicMembrane	7		TMH	G3DSA:1.10.3470.10	PTHR30477:SF0,PTHR30477	PF00950;ABC 3 transport family	-	-	-	-	-	-	SSF81345	-	TMhelix;Region of a membrane-bound protein predicted to be embedded in the membrane.	ABC transporter	aproNOG	P	0	0	0	NA	NA	378.591	299.02	894.175
BHCHEMG|NC_005956_114675_114544_-2_ATG_43	NC_005956	114544	114675	-2	ATG	129	1				114544..114675(-)		ORF_114544..114675_43aa_-2			43	Unknown	0		CYT	-	-	-	-	-	-	-	-	-	-	-	-				0	0	0	NA	NA	0	0	0
BH_RS00430|rso|ens|geno|+9aa_chemg|prod|NC_005956_114131_115036_+2_ATG_301	NC_005956	114131	115036	+2	ATG	903	0	BH_RS00430	BH00890	BH00890	114104..115036(+)	NC_005956_00880	ORF_114104..115036_310aa_+2	n to n	BHPROD|MQB277_111626_112531_+2_ATG_301	301	CytoplasmicMembrane	9		TMH	G3DSA:1.10.3470.10	PTHR30477,PTHR30477:SF0	PF00950;ABC 3 transport family	-	-	-	-	-	-	SSF81345	-	TMhelix;Region of a membrane-bound protein predicted to be embedded in the membrane.	ABC transporter	aproNOG	P	0	0	0	NA	NA	16.3873	18.4844	36.2513
BH_RS00435|rso|ens|geno|-17aa_chemg|prod|NC_005956_115434_115817_+3_ATG_127	NC_005956	115434	115817	+3	ATG	381	1	BH_RS00435	BH00900	BH00900	115485..115817(+)	NC_005956_00890	ORF_115434..115817_127aa_+3	n to n	BHPROD|MQB277_112929_113312_+3_ATG_127	127	CytoplasmicMembrane	3		TMH	-	-	PF04304;Protein of unknown function (DUF454)	PIRSF016789	-	-	-	-	-	-	-	TMhelix;Region of a membrane-bound protein predicted to be embedded in the membrane.	Protein of unknown function (DUF454)	aproNOG	S	1	1	5	NA	NA	1013.4	695.79	2596.9	0	0	4.15965	0	IM exclusive
BH_RS00440|-32aa_geno|chemg|prod|NC_005956_116535_116753_+3_ATG_72	NC_005956	116535	116753	+3	ATG	216	1	BH_RS00440		BARHE0105	116535..116753(+)	NC_005956_00900	ORF_116535..116753_72aa_+3	0 to n	BHPROD|MQB277_114030_114248_+3_ATG_72	72	Unknown	1		CYT	-	-	-	-	-	-	-	-	-	-	-	-				0	0	0	NA	NA	38.3672	44.2216	87.4636
BH_RS00445|rso|ens|geno|chemg|prod|NC_005956_118193_116889_-3_ATG_434	NC_005956	116889	118193	-3	ATG	1302	0	BH_RS00445	BH00910	BH00910	116889..118193(-)	NC_005956_00910	ORF_116889..118193_434aa_-3	n to n	BHPROD|MQB277_115688_114384_-2_ATG_434	434	Cytoplasmic	0		CYT	G3DSA:3.20.140.10	PTHR11098,PTHR11098:SF1	PF04095;Nicotinate phosphoribosyltransferase (NAPRTase) family	PIRSF000484	-	-	-	-	-	SSF54675,SSF51690	TIGR01514;NAPRTase: nicotinate phosphoribosyltransferase	-	Nicotinate Phosphoribosyltransferase	aproNOG	H	1	14	73	0.743852	0.606857	122.231	94.7933	293.437	0	9.99998	3.77072	0.496798	Cyt predominant
BHCHEMG|NC_005956_117433_117191_-1_ATG_80	NC_005956	117191	117433	-1	ATG	240	0				117191..117433(-)		ORF_117191..117433_80aa_-1			80	CytoplasmicMembrane	2		TMH	-	-	-	-	-	-	-	-	-	-	-	TMhelix;Region of a membrane-bound protein predicted to be embedded in the membrane.	Major Facilitator Superfamily	bactNOG	G	0	0	0	NA	NA	0	0	0
BHCHEMG|NC_005956_117439_117690_+1_GTG_83	NC_005956	117439	117690	+1	GTG	249	0				117439..117690(+)		ORF_117451..117690_79aa_+1			83	Unknown	1		CYT	-	-	-	-	-	-	-	-	-	-	-	TMhelix;Region of a membrane-bound protein predicted to be embedded in the membrane.				0	0	0	NA	NA	0	0	0
BH_RS00450|rso|ens|geno|-804aa_chemg|prod|NC_005956_126888_118324_-2_ATG_2854	NC_005956	118324	126888	-2	ATG	8562	0	BH_RS00450	BH00920	BH00920	118324..124476(-)	NC_005956_00920	ORF_118324..126888_2854aa_-2	n to n		2854	CytoplasmicMembrane	7		CYT	G3DSA:2.70.98.40,G3DSA:2.60.420.10	-	PF06204;Putative carbohydrate binding domain,PF10091;Putative glucoamylase,PF11329;Protein of unknown function (DUF3131),PF06165;Glycosyltransferase family 36,PF06205;Glycosyltransferase 36 associated family	-	-	-	-	-	SM01068;Putative carbohydrate binding domain	SSF74650,SSF53448,SSF48208	-	TMhelix;Region of a membrane-bound protein predicted to be embedded in the membrane.	Cyclic beta 1-2 glucan synthetase	aproNOG	G	1	77	296	-0.00575044	1	5465.49	5644.41	12862	10	0	5	8.88178e-15	TM exclusive
BHCHEMG|NC_005956_125294_125088_-3_ATG_68	NC_005956	125088	125294	-3	ATG	204	1				125088..125294(-)		ORF_125088..125294_68aa_-3			68	Unknown	0	yes	SpI	-	-	-	-	-	-	-	-	-	-	-	TMhelix;Region of a membrane-bound protein predicted to be embedded in the membrane.				0	0	0	NA	NA	0	0	0
BHCHEMG|NC_005956_124888_125091_+1_TTG_67	NC_005956	124888	125091	+1	TTG	201	1				124888..125091(+)		ORF_124954..125091_45aa_+1			67	Unknown	0		CYT	-	-	-	-	-	-	-	-	-	-	-	-				0	0	0	NA	NA	0	0	0
BHCHEMG|NC_005956_125242_125394_+1_TTG_50	NC_005956	125242	125394	+1	TTG	150	1				125242..125394(+)		ORF_125251..125394_47aa_+1			50	Unknown	0		CYT	-	-	-	-	-	-	-	-	-	-	-	-				0	0	0	NA	NA	0	0	0
BH_RS00455|rso|ens|geno|chemg|prod|NC_005956_128783_127083_-3_ATG_566	NC_005956	127083	128783	-3	ATG	1698	0	BH_RS00455	BH00930	BH00930	127083..128783(-)	NC_005956_00930	ORF_127083..128783_566aa_-3	n to n	BHPROD|MQB277_126278_124578_-2_ATG_566	566	Cytoplasmic	0		CYT	G3DSA:2.40.50.140	PTHR10724,PTHR10724:SF6	PF00575;S1 RNA binding domain	PIRSF002111	PR00681;Ribosomal protein S1 signature	-	PS50126;S1 domain profile.	-	SM00316;Ribosomal protein S1-like RNA-binding domain	SSF50249	TIGR00717;rpsA: ribosomal protein bS1	-	thus facilitating recognition of the initiation point. It is needed to translate mRNA with a short Shine-Dalgarno (SD) purine-rich sequence (By similarity)	aproNOG	J	1	140	3010	0.208731	0.640721	4135.27	3536.97	14565.9	0	6.0034	10	4.25836e-07	Cyt predominant
BHCHEMG|NC_005956_128614_128829_+1_TTG_71	NC_005956	128614	128829	+1	TTG	213	0				128614..128829(+)		ORF_128662..128829_55aa_+1			71	Unknown	0	yes	SpI	-	-	-	-	-	-	-	-	-	-	-	-				0	0	0	NA	NA	239.195	262.286	653.143
BH_RS00460|rso|ens|geno|prod|NC_005956_129563_128916_-3_TTG_215	NC_005956	128916	129563	-3	TTG	645	0	BH_RS00460	BH00940	BH00940		NC_005956_00940	ORF_128916..129563_215aa_-3	n to n	BHPROD|MQB277_127058_126411_-2_TTG_215	215	Cytoplasmic	0		CYT	G3DSA:3.40.50.300	PTHR21299:SF2,PTHR21299	PF02224;Cytidylate kinase,PF13207;AAA domain	-	-	-	-	-	-	SSF52540	TIGR00017;cmk: cytidylate kinase	-	Cytidine monophosphate kinase	aproNOG	F	1	13	132	-0.388484	0.733142	1210.3	1793.03	2330.42	9.98232	2.9555e-11	7.34279	8.75178e-09	IM predominant
BH_RS00465|rso|ens|geno|chemg|prod|NC_005956_130888_129560_-1_ATG_442	NC_005956	129560	130888	-1	ATG	1326	0	BH_RS00465	BH00950	BH00950	129560..130888(-)	NC_005956_00950	ORF_129560..130888_442aa_-1	n to n	BHPROD|MQB277_128383_127055_-3_ATG_442	442	Cytoplasmic	0		CYT	G3DSA:3.65.10.10	PTHR21090	PF00275;EPSP synthase (3-phosphoshikimate 1-carboxyvinyltransferase)	PIRSF000505	-	PS00104;EPSP synthase signature 1.	-	-	-	SSF55205	TIGR01356;aroA: 3-phosphoshikimate 1-carboxyvinyltransferase	-	5-enolpyruvylshikimate-3-phosphate synthase	aproNOG	E	1	31	307	0.135928	0.8643	574.487	550.658	1348.41	0	9.99841	9.99251	0.00127702	Cyt predominant
BHCHEMG|NC_005956_130773_130633_-2_GTG_46	NC_005956	130633	130773	-2	GTG	138	1				130633..130773(-)		ORF_130633..130755_40aa_-2			46	Unknown	0		CYT	-	-	-	-	-	-	-	-	-	-	-	-				0	0	0	NA	NA	0	0	0
BH_RS00470|rso|ens|geno|prod|NC_005956_131075_131455_+2_ATG_126	NC_005956	131075	131455	+2	ATG	378	0	BH_RS00470	BH00960	BH00960		NC_005956_00960	ORF_131075..131455_126aa_+2	n to n	BHPROD|MQB277_128570_128950_+2_ATG_126	126	Cytoplasmic	0		CYT	-	-	PF09538;Protein of unknown function (FYDLN_acid)	-	-	-	-	-	-	-	TIGR02300;FYDLN_acid: TIGR02300 family protein	-	Protein of unknown function (FYDLN_acid)	aproNOG	S	1	10	111	0.126832	0.928741	746.815	806.92	1595.6	0	10	4.9943	0	Cyt predominant
BHGENO0112|NC_005956_132225_132091_-2_ATG_44	NC_005956	132091	132225	-2	ATG	132	1			BARHE0112			ORF_132091..132225_44aa_-2			44	Unknown	0		CYT	-	-	-	-	-	-	-	-	-	-	-	-				0	0	0	NA	NA	136.394	99.0878	280.398
BH_RS00480|chemg|prod|NC_005956_131825_132115_+2_ATG_96	NC_005956	131825	132115	+2	ATG	288	1	BH_RS00480			131825..132115(+)	NC_005956_00980	ORF_131825..132115_96aa_+2	0 to n	BHPROD|MQB277_129320_129610_+2_ATG_96	96	Unknown	0		CYT	-	-	-	-	-	-	-	-	-	-	-	-				0	0	0	NA	NA	1488.78	1505.39	3371.51
BHCHEMG|NC_005956_132736_132539_-1_GTG_65	NC_005956	132539	132736	-1	GTG	195	1				132539..132736(-)		ORF_132539..132616_25aa_-1			65	Unknown	0		CYT	-	-	-	-	-	-	-	-	-	-	-	-				0	0	0	NA	NA	0	0	0
BH_RS00485|rso|ens|geno|+21aa_chemg|prod|NC_005956_132510_134348_+3_ATG_612	NC_005956	132510	134348	+3	ATG	1836	0	BH_RS00485	BH00980	BH00980	132447..134348(+)	NC_005956_00990	ORF_132510..134348_612aa_+3	n to n	BHPROD|MQB277_130005_131843_+3_ATG_612	612	Cytoplasmic	0		CYT	-	PTHR21000,PTHR21000:SF11	PF00920;Dehydratase family	-	-	PS00887;Dihydroxy-acid and 6-phosphogluconate dehydratases signature 2.,PS00886;Dihydroxy-acid and 6-phosphogluconate dehydratases signature 1.	-	-	-	SSF52016,SSF143975	TIGR00110;ilvD: dihydroxy-acid dehydratase	-	Dihydroxy-acid dehydratase	aproNOG	E	1	28	331	0.23043	0.758279	2024.92	2199.55	5115.67	0	10	7.33445	0.926624	Cyt predominant
BHGENO0114|NC_005956_134504_134385_-3_GTG_39	NC_005956	134385	134504	-3	GTG	117	1			BARHE0114			ORF_134385..134504_39aa_-3			39	Unknown	0		CYT	-	-	-	-	-	-	-	-	-	-	-	-				0	0	0	NA	NA	32.1635	18.5339	42.671
BH_RS00490|NC_005956_134534_134755_+2_ATG_73	NC_005956	134534	134755	+2	ATG	219	1	BH_RS00490	BH00990(p)	BH00990(p)			ORF_134534..134755_73aa_+2	p to n		73	Unknown	1		CYT	-	-	-	-	-	-	-	-	-	-	-	TMhelix;Region of a membrane-bound protein predicted to be embedded in the membrane.				0	0	0	NA	NA	7.36381	6.7828	14.2872
BHPROD|NC_005956_135169_135264_+1_ATG_31	NC_005956	135169	135264	+1	ATG	93	1					NC_005956_01000	ORF_135169..135264_31aa_+1		BHPROD|MQB277_132664_132759_+1_ATG_31	31	Unknown	0		CYT	-	-	-	-	-	-	-	-	-	-	-	-				0	0	0	NA	NA	112.274	59.8041	302.792
BH_RS00495|rso|ens|geno|chemg|prod|NC_005956_139371_136627_-2_ATG_914	NC_005956	136627	139371	-2	ATG	2742	0	BH_RS00495	BH01000	BH01000	136627..139371(-)	NC_005956_01010	ORF_136627..139371_914aa_-2	n to n	BHPROD|MQB277_136866_134122_-1_ATG_914	914	Cytoplasmic	0		CYT	G3DSA:3.40.50.300,G3DSA:3.30.420.110,G3DSA:1.10.1420.10,G3DSA:3.40.1170.10	PTHR11361,PTHR11361:SF27	PF05188;MutS domain II,PF05192;MutS domain III,PF00488;MutS domain V,PF01624;MutS domain I,PF05190;MutS family domain IV	PIRSF037677	-	PS00486;DNA mismatch repair proteins mutS family signature.	-	-	SM00533;DNA-binding domain of DNA mismatch repair MUTS family,SM00534;ATPase domain of DNA mismatch repair MUTS family	SSF55271,SSF48334,SSF53150,SSF52540	TIGR01070;mutS1: DNA mismatch repair protein MutS	-	that it carries out the mismatch recognition step. This protein has a weak ATPase activity (By similarity)	aproNOG	L	1	63	478	0.430098	0.505676	979.373	926.928	2336.65	2.23378	3.08606e-11	9.99699	0.000251816
BHCHEMG|NC_005956_137416_137583_+1_GTG_55	NC_005956	137416	137583	+1	GTG	165	1				137416..137583(+)		ORF_137500..137583_27aa_+1			55	Unknown	0		CYT	-	-	-	-	-	-	-	-	-	-	-	-				0	0	0	NA	NA	0	0	0
BHGENO0116|NC_005956_139537_139391_-1_ATG_48	NC_005956	139391	139537	-1	ATG	144	1			BARHE0116			ORF_139391..139537_48aa_-1			48	Unknown	1		CYT	-	-	-	-	-	-	-	-	-	-	-	-				0	0	0	NA	NA	123.69	64.6531	257.176
BH_RS00500|rso|ens|geno|chemg|prod|NC_005956_139581_141878_+3_ATG_765	NC_005956	139581	141878	+3	ATG	2295	0	BH_RS00500	BH01010	BH01010	139581..141878(+)	NC_005956_01020	ORF_139581..141878_765aa_+3	n to n	BHPROD|MQB277_137076_139373_+3_ATG_765	765	Cytoplasmic	0		CYT	G3DSA:3.40.50.10380,G3DSA:3.40.50.10750,G3DSA:3.40.50.720	PTHR23406,PTHR23406:SF18	PF03949;Malic enzyme, NAD binding domain,PF01515;Phosphate acetyl/butaryl transferase,PF00390;Malic enzyme, N-terminal domain	PIRSF036684	-	PS00331;Malic enzymes signature.	-	-	SM00919;Malic enzyme, NAD binding domain	SSF53223,SSF51735,SSF53659	-	-	Malic enzyme	aproNOG	C	1	69	687	0.740136	0.200234	1067.8	958.536	2853.45	0	10	10	1.56582e-07	Cyt predominant
BH_RS00505|rso|ens|geno|chemg|prod|NC_005956_142405_141929_-1_ATG_158	NC_005956	141929	142405	-1	ATG	474	0	BH_RS00505	BH01020	BH01020	141929..142405(-)	NC_005956_01030	ORF_141929..142405_158aa_-1	n to n	BHPROD|MQB277_139900_139424_-3_ATG_158	158	Cytoplasmic	0		CYT	G3DSA:3.10.420.10	-	PF02556;Preprotein translocase subunit SecB	-	PR01594;Bacterial protein-transport SecB chaperone protein signature	-	-	-	-	SSF54611	TIGR00809;secB: protein-export chaperone SecB	-	One of the proteins required for the normal export of preproteins out of the cell cytoplasm. It is a molecular chaperone that binds to a subset of precursor proteins, maintaining them in a translocation-competent state. It also specifically binds to its receptor SecA (By similarity)	aproNOG	U	1	29	318	-0.275489	0.72063	629.229	451.648	1779.81	0	8.02492	9.92328	0.0152377	Cyt predominant
BHORF|NC_005956_142112_142174_+2_ATG_20	NC_005956	142112	142174	+2	ATG	60	6						ORF_142055..142174_39aa_+2			20	Unknown	0		CYT	-	-	-	-	-	-	-	-	-	-	-	-				0	1	1	NA	NA	0	0	0
BH_RS00510|rso|ens|geno|chemg|prod|NC_005956_143057_142551_-3_GTG_168	NC_005956	142551	143057	-3	GTG	504	0	BH_RS00510	BH01030	BH01030	142551..143057(-)	NC_005956_01040	ORF_142551..142682_43aa_-3	n to n	BHPROD|MQB277_140552_140046_-2_GTG_168	168	CytoplasmicMembrane	4		TMH	-	-	PF04186;FxsA cytoplasmic membrane protein	-	-	-	-	-	-	-	-	TMhelix;Region of a membrane-bound protein predicted to be embedded in the membrane.	FxsA cytoplasmic membrane protein	aproNOG	S	1	5	23	-0.171112	0.990185	77.6806	58.854	131.219	9.57765	0	4.95156	0	IM exclusive
BH_RS00515|rso|ens|geno|+4aa_chemg|+2aa_prod|NC_005956_143241_143933_+3_ATG_230	NC_005956	143241	143933	+3	ATG	690	0	BH_RS00515	BH01040	BH01040	143229..143933(+)	NC_005956_01050	ORF_143241..143933_230aa_+3	n to n	BHPROD|MQB277_140730_141428_+3_GTG_232	230	Unknown	1		CYT	-	PTHR10721	PF04280;Tim44-like domain	PIRSF031890	-	-	-	-	SM00978;Target=BH_RS00515|rso|ens|geno|+4aa_chemg|+2aa_prod|NC_005956_143241_143933_+3_ATG_230 82 228	SSF54427	-	TMhelix;Region of a membrane-bound protein predicted to be embedded in the membrane.	Import inner membrane translocase subunit TIM44	aproNOG	S	1	26	460	-0.801162	0.231746	200.436	237.349	448.423	6.05717	0	9.99101	0	IM predominant
BH_RS00520|rso|ens|geno|+4aa_chemg|prod|NC_005956_143996_144616_+2_ATG_206	NC_005956	143996	144616	+2	ATG	618	0	BH_RS00520	BH01050	BH01050	143984..144616(+)	NC_005956_01060	ORF_143996..144616_206aa_+2	n to n	BHPROD|MQB277_141491_142111_+2_ATG_206	206	Cytoplasmic	0		CYT	-	-	PF01713;Smr domain	-	-	-	PS50828;Smr domain profile.	-	SM00463;Small MutS-related domain	SSF160443	-	-	Smr protein MutS2	aproNOG	S	1	7	45	1.3243	0.472595	178.166	194.814	357.473	9.94362	0	4.98943	0.00156165	TM exclusive
BHRSO01070_p|ens_p|geno_p|NC_005956_145715_145476_-3_GAT_80	NC_005956	145476	145715	-3	GAT	237	6		BH01070(p)	BH01070(p)				p to 0		80	Unknown	0		CYT	-	-	-	-	-	-	-	-	-	-	-	-				0	0	0	NA	NA	20.6348	27.6019	39.4135
BHGENO0122|NC_005956_145951_145832_-1_ATG_39	NC_005956	145832	145951	-1	ATG	117	1		BH01060(p)	BARHE0122			ORF_145832..145951_39aa_-1	p to 0		39	Unknown	0		CYT	-	-	-	-	-	-	-	-	-	-	-	-				0	0	0	NA	NA	2.59182	4.73401	3.06584
BH_RS00525|rso|ens|geno|chemg|prod|NC_005956_147550_146540_-1_ATG_336	NC_005956	146540	147550	-1	ATG	1008	0	BH_RS00525	BH01080	BH01080	146540..147550(-)	NC_005956_01070	ORF_146540..147550_336aa_-1	n to n	BHPROD|MQB277_145045_144035_-3_ATG_336	336	Cytoplasmic	0		CYT	G3DSA:3.90.1280.10,G3DSA:3.55.30.10	PTHR30111,PTHR30111:SF1	PF01430;Hsp33 protein	PIRSF005261	-	-	-	-	-	SSF118352,SSF64397	-	-	Redox regulated molecular chaperone. Protects both thermally unfolding and oxidatively damaged proteins from irreversible aggregation. Plays an important role in the bacterial defense system toward oxidative stress (By similarity)	aproNOG	O	1	21	134	-0.236296	0.840581	217.691	250.585	493.359	5.34617e-06	3.73267	7.84765	1.02602e-06
BHORF|NC_005956_147808_147906_+1_TTG_32	NC_005956	147808	147906	+1	TTG	96	1						ORF_147808..147906_32aa_+1			32	Unknown	0		CYT	-	-	-	-	-	-	-	-	-	-	-	-				0	0	0	NA	NA	56.0654	50.9765	114.452
BHGENO0124|NC_005956_148267_148112_-1_GTG_51	NC_005956	148112	148267	-1	GTG	153	1			BARHE0124			ORF_148112..148267_51aa_-1			51	Unknown	0	yes	CYT	-	-	-	-	-	-	-	-	-	-	-	-				0	0	0	NA	NA	192.547	215.549	446.97
BH_RS00530|rso|ens|geno|chemg|prod|NC_005956_149737_148532_-1_ATG_401	NC_005956	148532	149737	-1	ATG	1203	0	BH_RS00530	BH01090	BH01090	148532..149737(-)	NC_005956_01080	ORF_148532..149737_401aa_-1	n to n	BHPROD|MQB277_147232_146027_-3_ATG_401	401	Cytoplasmic	0		CYT	G3DSA:3.40.640.10,G3DSA:3.90.1150.10	PTHR11986,PTHR11986:SF62	PF00202;Aminotransferase class-III	-	-	PS00600;Aminotransferases class-III pyridoxal-phosphate attachment site.	-	-	-	SSF53383	TIGR00707;argD: transaminase, acetylornithine/succinylornithine family	-	acetylornithine aminotransferase	aproNOG	E	1	13	66	0.466318	0.769749	137.351	148.961	354.195	0.000286551	6.25371	8.58372	0.000328562	Cyt predominant
BHGENO0126|NC_005956_149789_149962_+2_CTG_57	NC_005956	149789	149962	+2	CTG	171	1			BARHE0126			ORF_149789..149962_57aa_+2			57	Unknown	0		CYT	-	-	-	-	-	-	-	-	-	-	-	-				0	0	0	NA	NA	10.4183	10.8478	27.1196
BH_RS00535|rso|ens|geno|chemg|prod|NC_005956_150217_150750_+1_ATG_177	NC_005956	150217	150750	+1	ATG	531	0	BH_RS00535	BH01100	BH01100	150217..150750(+)	NC_005956_01090	ORF_150217..150750_177aa_+1	n to n	BHPROD|MQB277_147712_148245_+1_ATG_177	177	Unknown	0		CYT	-	-	PF07750;GcrA cell cycle regulator	-	-	-	-	-	-	-	-	-	gcrA cell cycle regulator	aproNOG	S	1	13	222	0.284115	0.745827	200.119	213.653	507.906	3.04392e-08	4.26704	7.33583	0.00129177
BHGENO0128|prod|NC_005956_151225_151082_-1_ATG_47	NC_005956	151082	151225	-1	ATG	141	1			BARHE0128		NC_005956_01100	ORF_151082..151225_47aa_-1		BHPROD|MQB277_148720_148577_-3_ATG_47	47	Unknown	0		CYT	-	-	-	-	-	-	-	-	-	-	-	-				0	0	0	NA	NA	17.8686	16.0526	37.5298
BH_RS00540|rso|ens|geno|chemg|prod|NC_005956_152258_151611_-3_ATG_215	NC_005956	151611	152258	-3	ATG	645	0	BH_RS00540	BH01110	BH01110	151611..152258(-)	NC_005956_01110	ORF_151611..152258_215aa_-3	n to n	BHPROD|MQB277_149753_149106_-2_ATG_215	215	Unknown	1		TMH	G3DSA:3.40.30.10	PTHR10681,PTHR10681:SF74	PF08534;Redoxin	-	-	PS00194;Thioredoxin family active site.	PS51352;Thioredoxin domain profile.	-	-	SSF52833	TIGR00385;dsbE: periplasmic protein thiol:disulfide oxidoreductases, DsbE subfamily	TMhelix;Region of a membrane-bound protein predicted to be embedded in the membrane.	Thiol disulfide interchange protein	aproNOG	O	1	4	7	NA	NA	178.565	127.559	410.634	0	0	3.35291	0.411772
BHRSO01120|ens|geno|prod|NC_005956_152484_152233_-2_ATG_83	NC_005956	152233	152484	-2	ATG	249	1		BH01120	BH01120		NC_005956_01120	ORF_152233..152484_83aa_-2	n to 0	BHPROD|MQB277_149979_149728_-1_ATG_83	83	Unknown	1		CYT	-	-	-	-	-	-	-	-	-	-	-	TMhelix;Region of a membrane-bound protein predicted to be embedded in the membrane.				0	0	0	NA	NA	14.9268	24.3894	23.601
BH_RS00545|rso|ens|geno|+12aa_chemg|prod|NC_005956_153252_152497_-2_ATG_251	NC_005956	152497	153252	-2	ATG	753	0	BH_RS00545	BH01130	BH01130	152497..153288(-)	NC_005956_01130	ORF_152497..153252_251aa_-2	n to n	BHPROD|MQB277_150747_149992_-1_ATG_251	251	CytoplasmicMembrane	6		TMH	-	PTHR30071,PTHR30071:SF4	PF01578;Cytochrome C assembly protein	-	PR01386;Cytochrome c-type biogenesis protein CcmC signature	-	-	-	-	-	TIGR01191;ccmC: heme exporter protein CcmC	TMhelix;Region of a membrane-bound protein predicted to be embedded in the membrane.	Heme exporter protein	aproNOG	O	1	7	54	-0.0742504	0.992659	113.493	108.555	345.146	9.92483	0	7.34278	0	IM exclusive
BH_RS00550|rso|ens|geno|prod|NC_005956_153964_153299_-1_ATG_221	NC_005956	153299	153964	-1	ATG	663	0	BH_RS00550	BH01140	BH01140		NC_005956_01140	ORF_153299..153964_221aa_-1	n to n	BHPROD|MQB277_151459_150794_-3_ATG_221	221	CytoplasmicMembrane	6		TMH	-	PTHR30070:SF1,PTHR30070	PF03379;CcmB protein	PIRSF002764	PR01414;Cytochrome c-type biogenesis protein CcmB signature	-	-	-	-	-	TIGR01190;ccmB: heme exporter protein CcmB	TMhelix;Region of a membrane-bound protein predicted to be embedded in the membrane.	Required for the export of heme to the periplasm for the biogenesis of c-type cytochromes (By similarity)	aproNOG	O	0	0	0	NA	NA	1.50652	0.473996	3.60237
BHCHEMG|NC_005956_153315_153752_+3_TTG_145	NC_005956	153315	153752	+3	TTG	435	1				153315..153752(+)		ORF_153447..153752_101aa_+3			145	Unknown	0		CYT	-	-	-	-	-	-	-	-	-	-	-	-				0	0	0	NA	NA	0	0	0
BH_RS00555|rso|ens|geno|chemg|prod|NC_005956_154587_153961_-2_ATG_208	NC_005956	153961	154587	-2	ATG	624	0	BH_RS00555	BH01150	BH01150	153961..154587(-)	NC_005956_01150	ORF_153961..154587_208aa_-2	n to n	BHPROD|MQB277_152082_151456_-1_ATG_208	208	CytoplasmicMembrane	0		CYT	G3DSA:3.40.50.300	PTHR24220,PTHR24220:SF407	PF00005;ABC transporter	-	-	-	PS51243;Cytochrome C biogenesis export ATP-binding protein ccmA family profile.,PS50893;ATP-binding cassette, ABC transporter-type domain profile.	-	SM00382;ATPases associated with a variety of cellular activities	SSF52540	TIGR01189;ccmA: heme ABC exporter, ATP-binding protein CcmA	-	once thought to export heme, this seems not to be the case, but its exact role is uncertain. Responsible for energy coupling to the transport system (By similarity)	aproNOG	O	1	1	6	NA	NA	60.2001	44.2566	141.044	5.78125	0	3.2195	0	IM exclusive
BHCHEMG|NC_005956_153771_154004_+3_TTG_77	NC_005956	153771	154004	+3	TTG	231	1				153771..154004(+)		ORF_153855..154004_49aa_+3			77	Unknown	0		CYT	-	-	-	-	-	-	-	-	-	-	-	-				0	0	0	NA	NA	0	0	0
BHCHEMG|NC_005956_154009_154140_+1_ATG_43	NC_005956	154009	154140	+1	ATG	129	1				154009..154140(+)		ORF_154009..154140_43aa_+1			43	Unknown	0		CYT	-	-	-	-	-	-	-	-	-	-	-	-				0	0	0	NA	NA	0	0	0
BHCHEMG|NC_005956_154251_154322_+3_CTG_23	NC_005956	154251	154322	+3	CTG	69	6				154251..154322(+)		ORF_154266..154322_18aa_+3			23	Unknown	0		CYT	-	-	-	-	-	-	-	-	-	-	-	-				0	0	0	NA	NA	0	0	0
BHORF|NC_005956_155281_155099_-1_GTG_60	NC_005956	155099	155281	-1	GTG	180	0						ORF_155099..155281_60aa_-1			60	Unknown	0		CYT	-	-	-	-	-	-	-	-	-	-	-	-				0	1	1	NA	NA	0	0	0
BHCHEMG|NC_005956_156465_156331_-2_ATG_44	NC_005956	156331	156465	-2	ATG	132	0				156331..156465(-)		ORF_156331..156465_44aa_-2			44	Unknown	0		CYT	-	-	-	-	-	-	-	-	-	-	-	-				0	0	0	NA	NA	0	0	0
BH_RS00560|rso|ens|geno|chemg|prod|NC_005956_154889_157576_+2_ATG_895	NC_005956	154889	157576	+2	ATG	2685	0	BH_RS00560	BH01160	BH01160	154889..157576(+)	NC_005956_01160	ORF_154889..157576_895aa_+2	n to n	BHPROD|MQB277_152384_155071_+2_ATG_895	895	Cytoplasmic	0		CYT	G3DSA:3.30.499.10,G3DSA:3.20.19.10,G3DSA:3.40.1060.10	PTHR11670,PTHR11670:SF1	PF00694;Aconitase C-terminal domain,PF00330;Aconitase family (aconitate hydratase)	-	PR00415;Aconitase family signature	PS00450;Aconitase family signature 1.,PS01244;Aconitase family signature 2.	-	-	-	SSF52016,SSF53732	TIGR01341;aconitase_1: aconitate hydratase 1	-	Aconitate hydratase	aproNOG	C	1	105	1556	0.0138903	0.97976	3280.03	4200.19	7682.44	0	10	9.94349	0.0288514	Cyt predominant
BHGENO0134|NC_005956_157598_157735_+2_GTG_45	NC_005956	157598	157735	+2	GTG	135	1			BARHE0134			ORF_157598..157735_45aa_+2			45	Unknown	0	yes	CYT	-	-	-	-	-	-	-	-	-	-	-	-				0	0	0	NA	NA	87.4394	89.87	166.187
BH_RS00565|rso|ens|geno|prod|NC_005956_157800_158066_+3_ATG_88	NC_005956	157800	158066	+3	ATG	264	0	BH_RS00565	BH01170	BH01170		NC_005956_01170	ORF_157779..158066_95aa_+3	n to n	BHPROD|MQB277_155295_155561_+3_ATG_88	88	Cytoplasmic	0		CYT	G3DSA:1.20.58.110	-	PF01649;Ribosomal protein S20	-	-	-	-	-	-	SSF46992	TIGR00029;S20: ribosomal protein bS20	-	Binds directly to 16S ribosomal RNA (By similarity)	aproNOG	J	1	48	727	-0.242141	0.678229	7693.98	8931.43	13761.8	0	2.64995	0.000766195	9.99785
BHPROD|NC_005956_158408_158253_-3_ATG_51	NC_005956	158253	158408	-3	ATG	153	1					NC_005956_01180	ORF_158253..158408_51aa_-3		BHPROD|MQB277_155903_155748_-2_ATG_51	51	Unknown	0		CYT	-	-	-	-	-	-	-	-	-	-	-	-				0	0	0	NA	NA	70.0199	52.6246	115.022
BHPROD|NC_005956_158677_158781_+1_ATG_34	NC_005956	158677	158781	+1	ATG	102	1					NC_005956_01190	ORF_158677..158781_34aa_+1		BHPROD|MQB277_156172_156276_+1_ATG_34	34	CytoplasmicMembrane	0	yes	CYT	-	-	-	-	-	-	-	-	-	-	-	-				0	0	0	NA	NA	2455.81	721.69	9399.75
BH_RS00570|rso|ens|geno|chemg|prod|NC_005956_158771_160342_+2_ATG_523	NC_005956	158771	160342	+2	ATG	1569	0	BH_RS00570	BH01180	BH01180	158771..160342(+)	NC_005956_01200	ORF_158771..160342_523aa_+2	n to n	BHPROD|MQB277_156266_157837_+2_ATG_523	523	Cytoplasmic	0		CYT	G3DSA:1.10.1750.10,G3DSA:3.40.50.300,G3DSA:1.10.8.60	PTHR30050:SF0,PTHR30050	PF08299;Bacterial dnaA protein helix-turn-helix,PF00308;Bacterial dnaA protein,PF11638;DnaA N-terminal domain	-	PR00051;Bacterial chromosomal replication initiator (DNAA) signature	PS01008;DnaA protein signature.	-	-	SM00382;ATPases associated with a variety of cellular activities,SM00760;Bacterial dnaA protein helix-turn-helix domain	SSF52540,SSF48295	TIGR00362;DnaA: chromosomal replication initiator protein DnaA	-	it binds specifically double-stranded DNA at a 9 bp consensus (dnaA box) 5'-TTATC CA A CA A-3'. DnaA binds to ATP and to acidic phospholipids (By similarity)	aproNOG	L	1	50	548	-0.164868	0.797281	605.773	823.69	1532.5	10	0	5.03708	4.89099	TM predominant
BH_RS00575|rso|ens|geno|+4aa_chemg|prod|NC_005956_160539_161660_+3_ATG_373	NC_005956	160539	161660	+3	ATG	1119	0	BH_RS00575	BH01190	BH01190	160527..161660(+)	NC_005956_01210	ORF_160527..161660_377aa_+3	n to n	BHPROD|MQB277_158034_159155_+3_ATG_373	373	Cytoplasmic	0		CYT	G3DSA:3.10.150.10	PTHR30478	PF00712;DNA polymerase III beta subunit, N-terminal domain,PF02768;DNA polymerase III beta subunit, C-terminal domain,PF02767;DNA polymerase III beta subunit, central domain	PIRSF000804	-	-	-	-	SM00480;DNA polymerase III beta subunit	SSF55979	TIGR00663;dnan: DNA polymerase III, beta subunit	-	DNA polymerase III is a complex, multichain enzyme responsible for most of the replicative synthesis in bacteria. This DNA polymerase also exhibits 3' to 5' exonuclease activity. The beta chain is required for initiation of replication once it is clamped onto DNA, it slides freely (bidirectional and ATP- independent) along duplex DNA (By similarity)	aproNOG	L	1	43	901	0.584875	0.279712	243.893	248.002	645.386	5.93303e-13	9.71623e-08	9.99906	0.0002394
BHCHEMG|NC_005956_162632_162297_-3_GTG_111	NC_005956	162297	162632	-3	GTG	333	1				162297..162632(-)		ORF_162297..162482_61aa_-3			111	Unknown	0		CYT	-	-	-	-	-	-	-	-	-	-	-	-				0	0	0	NA	NA	0	0	0
BH_RS00580|rso|ens|geno|+3aa_chemg|prod|NC_005956_161681_162814_+2_ATG_377	NC_005956	161681	162814	+2	ATG	1131	0	BH_RS00580	BH01200	BH01200	161672..162814(+)	NC_005956_01220	ORF_161681..162814_377aa_+2	n to n	BHPROD|MQB277_159176_160309_+2_ATG_377	377	Cytoplasmic	0		CYT	G3DSA:3.40.50.300	PTHR32182,PTHR32182:SF0	PF02463;RecF/RecN/SMC N terminal domain	-	-	PS00618;RecF protein signature 2.,PS00617;RecF protein signature 1.	-	-	-	SSF52540	TIGR00611;recf: DNA replication and repair protein RecF	-	it is required for DNA replication and normal SOS inducibility. RecF binds preferentially to single-stranded, linear DNA. It also seems to bind ATP (By similarity)	aproNOG	L	1	11	60	0.370103	0.831946	90.1237	117.191	180.621	9.89977	0	4.83716	0.0690129	TM exclusive
BH_RS00585|rso|ens|geno|chemg|prod|NC_005956_162862_163308_+1_ATG_148	NC_005956	162862	163308	+1	ATG	444	0	BH_RS00585	BH01210	BH01210	162862..163308(+)	NC_005956_01230	ORF_162862..163308_148aa_+1	n to n	BHPROD|MQB277_160357_160803_+1_ATG_148	148	Cytoplasmic	0		CYT	G3DSA:3.40.50.9100	PTHR21272	PF01220;Dehydroquinase class II	PIRSF001399	-	PS01029;Dehydroquinase class II signature.	-	-	-	SSF52304	TIGR01088;aroQ: 3-dehydroquinate dehydratase, type II	-	Catalyzes a trans-dehydration via an enolate intermediate (By similarity)	aproNOG	E	1	7	35	1.59185	0.454576	155.592	189.893	349.696	0.0756121	5	4.9943	0.000469374	Cyt predominant
BH_RS00590|rso|ens|geno|+2aa_chemg|prod|NC_005956_163432_164403_+1_ATG_323	NC_005956	163432	164403	+1	ATG	969	0	BH_RS00590	BH01220	BH01220	163426..164403(+)	NC_005956_01240	ORF_163432..164403_323aa_+1	n to n	BHPROD|MQB277_160927_161898_+1_ATG_323	323	CytoplasmicMembrane	2	yes	TMH	G3DSA:2.60.40.420,G3DSA:1.10.287.90	PTHR22888:SF2,PTHR22888	PF06481;COX Aromatic Rich Motif,PF00116;Cytochrome C oxidase subunit II, periplasmic domain	PIRSF000292	-	-	PS50999;Cytochrome oxidase subunit II transmembrane region profile.,PS50857;Cytochrome oxidase subunit II copper A binding domain profile.,PS51257;Prokaryotic membrane lipoprotein lipid attachment site profile.	-	-	SSF81464,SSF49503	TIGR01433;CyoA: ubiquinol oxidase, subunit II	TMhelix;Region of a membrane-bound protein predicted to be embedded in the membrane.	ubiquinol oxidase subunit ii	aproNOG	C	1	67	1499	-0.628582	0.204957	6106.94	9730.29	13867	10	0	5.02285	4.96175	TM predominant
BHORF|NC_005956_166266_166135_-2_ATG_43	NC_005956	166135	166266	-2	ATG	129	1						ORF_166135..166278_47aa_-2			43	Unknown	0		CYT	-	-	-	-	-	-	-	-	-	-	-	-				0	1	1	NA	NA	0	0	0
BH_RS00595|rso|ens|geno|chemg|prod|NC_005956_164478_166496_+3_ATG_672	NC_005956	164478	166496	+3	ATG	2016	0	BH_RS00595	BH01230	BH01230	164478..166496(+)	NC_005956_01250	ORF_164478..166496_672aa_+3	n to n	BHPROD|MQB277_161973_163991_+3_ATG_672	672	CytoplasmicMembrane	15		TMH	G3DSA:1.20.210.10	PTHR10422,PTHR10422:SF6	PF00115;Cytochrome C and Quinol oxidase polypeptide I	-	PR01165;Cytochrome c oxidase subunit I signature	PS00077;Heme-copper oxidase catalytic subunit, copper B binding region signature.	PS50855;Cytochrome oxidase subunit I profile.	-	-	SSF81442	TIGR02843;CyoB: cytochrome o ubiquinol oxidase, subunit I	TMhelix;Region of a membrane-bound protein predicted to be embedded in the membrane.	Cytochrome C oxidase subunit I	aproNOG	C	1	31	1280	-0.397131	0.43569	8951.43	15696.8	19614.3	9.99999	0	10	2.9392e-10	IM predominant
BH_RS00600|rso|ens|geno|chemg|prod|NC_005956_166493_167158_+2_ATG_221	NC_005956	166493	167158	+2	ATG	663	1	BH_RS00600	BH01240	BH01240	166493..167158(+)	NC_005956_01260	ORF_166493..167158_221aa_+2	n to n	BHPROD|MQB277_163988_164653_+2_ATG_221	221	CytoplasmicMembrane	5		TMH	G3DSA:1.20.120.80	PTHR11403,PTHR11403:SF2	PF00510;Cytochrome c oxidase subunit III	-	-	-	PS50253;Heme-copper oxidase subunit III family profile.	-	-	SSF81452	-	TMhelix;Region of a membrane-bound protein predicted to be embedded in the membrane.	cytochrome o ubiquinol oxidase subunit III	aproNOG	C	1	6	48	-0.533682	0.793204	2648.78	4162.18	5386.62	9.86637	0	4.99997	0	IM exclusive
BH_RS00605|rso|ens|geno|+27aa_chemg|prod|NC_005956_167158_167844_+1_ATG_228	NC_005956	167158	167844	+1	ATG	684	0	BH_RS00605	BH01250	BH01250	167077..167844(+)	NC_005956_01270	ORF_167077..167844_255aa_+1	n to n	BHPROD|MQB277_164653_165339_+1_ATG_228	228	CytoplasmicMembrane	3		TMH	-	-	PF03626;Prokaryotic Cytochrome C oxidase subunit IV	-	-	-	-	-	-	-	TIGR02847;CyoD: cytochrome o ubiquinol oxidase subunit IV	TMhelix;Region of a membrane-bound protein predicted to be embedded in the membrane.	cytochrome o ubiquinol oxidase, subunit IV	aproNOG	C	1	13	351	-0.281619	0.703735	5153.63	8026.75	11386.5	1.63401	6.33804e-11	3.1064	5.70251
BH_RS00610|rso|ens|geno|chemg|prod|NC_005956_168283_169305_+1_ATG_340	NC_005956	168283	169305	+1	ATG	1020	1	BH_RS00610	BH01260	BH01260	168283..169305(+)	NC_005956_01280	ORF_168283..169305_340aa_+1	n to n	BHPROD|MQB277_165778_166800_+1_ATG_340	340	Cytoplasmic	0		CYT	G3DSA:3.40.50.720,G3DSA:1.10.1040.10	PTHR11728	PF01210;NAD-dependent glycerol-3-phosphate dehydrogenase N-terminus,PF07479;NAD-dependent glycerol-3-phosphate dehydrogenase C-terminus	PIRSF000114	PR00077;NAD-dependent glycerol-3-phosphate dehydrogenase signature	PS00957;NAD-dependent glycerol-3-phosphate dehydrogenase signature.	-	-	-	SSF48179,SSF51735	-	-	NADPH-dependent glycerol-3-phosphate dehydrogenase	aproNOG	C	1	20	140	-0.659213	0.54479	1484.71	1973.71	3476.45	5.21356	0.000285191	9.88722	3.23415e-05	IM predominant
BH_RS00615|rso|ens|geno|chemg|prod|NC_005956_170406_169588_-2_ATG_272	NC_005956	169588	170406	-2	ATG	816	0	BH_RS00615	BH01270	BH01270	169588..170406(-)	NC_005956_01290	ORF_169588..170406_272aa_-2	n to n	BHPROD|MQB277_167901_167083_-1_ATG_272	272	CytoplasmicMembrane	0		CYT	G3DSA:3.40.50.720	PTHR24322:SF317,PTHR24322	PF13561;Enoyl-(Acyl carrier protein) reductase	PIRSF000094	-	-	-	-	-	SSF51735	-	-	Enoyl- acyl-carrier-protein reductase NADH	aproNOG	I	1	26	300	0.504792	0.50591	1056.27	1324.23	2782.39	0	10	9.39211	1.91413e-06	Cyt predominant
BH_RS00620|rso|ens|geno|chemg|prod|NC_005956_171675_170455_-2_ATG_406	NC_005956	170455	171675	-2	ATG	1218	0	BH_RS00620	BH01280	BH01280	170455..171675(-)	NC_005956_01300	ORF_170455..171675_406aa_-2	n to n	BHPROD|MQB277_169170_167950_-1_ATG_406	406	Cytoplasmic	0	yes	CYT	G3DSA:3.40.47.10	PTHR11712,PTHR11712:SF237	PF00109;Beta-ketoacyl synthase, N-terminal domain,PF02801;Beta-ketoacyl synthase, C-terminal domain	-	-	PS00606;Beta-ketoacyl synthases active site.	-	-	SM00825;Beta-ketoacyl synthase	SSF53901	-	-	Catalyzes the condensation reaction of fatty acid synthesis by the addition to an acyl acceptor of two carbons from malonyl-ACP (By similarity)	aproNOG	I	1	42	569	0.145531	0.816696	2982.18	3279.85	9051.43	0	10	6.50776	2.6556	Cyt predominant
BH_RS00625|rso|ens|geno|chemg|prod|NC_005956_172242_171733_-2_ATG_169	NC_005956	171733	172242	-2	ATG	507	0	BH_RS00625	BH01290	BH01290	171733..172242(-)	NC_005956_01310	ORF_171733..172242_169aa_-2	n to n	BHPROD|MQB277_169737_169228_-1_ATG_169	169	Cytoplasmic	0		CYT	G3DSA:3.10.129.10	PTHR11712	PF07977;FabA-like domain	-	-	-	-	-	-	SSF54637	TIGR01749;fabA: beta-hydroxyacyl-(acyl-carrier-protein) dehydratase FabA	-	Necessary for the introduction of cis unsaturation into fatty acids. Catalyzes the dehydration of (3R)-3-hydroxydecanoyl- ACP to E-(2)-decenoyl-ACP and then its isomerization to Z-(3)- decenoyl-ACP. Can catalyze the dehydratase reaction for beta- hydroxyacyl-ACPs with saturated chain lengths up to 16 0, being most active on intermediate chain length (By similarity)	aproNOG	I	1	21	245	0.265785	0.75233	93.6496	93.9599	322.607	0	9.99283	9.98867	5.59246e-05	Cyt predominant
BH_RS00630|rso|ens|geno|+10aa_chemg|prod|NC_005956_172475_172978_+2_ATG_167	NC_005956	172475	172978	+2	ATG	501	0	BH_RS00630	BH01300	BH01300	172445..172978(+)	NC_005956_01320	ORF_172475..172978_167aa_+2	n to n	BHPROD|MQB277_169970_170473_+2_ATG_167	167	Cytoplasmic	0		CYT	G3DSA:1.10.10.10	-	PF01475;Ferric uptake regulator family	-	-	-	-	-	-	SSF46785	-	-	regulator Fur family	aproNOG	K	1	13	43	0.667952	0.738652	2415.17	3054.15	4436.46	4.7866	0.0646973	5.94904	0	IM exclusive
BH_RS00635|rso|ens|geno|chemg|prod|NC_005956_173594_173034_-3_GTG_186	NC_005956	173034	173594	-3	GTG	558	0	BH_RS00635	BH01310	BH01310	173034..173594(-)	NC_005956_01330	ORF_173034..173543_169aa_-3	n to n	BHPROD|MQB277_171089_170529_-2_GTG_186	186	Unknown	0	yes	TMH	-	-	PF06347;Bacterial SH3 domain	-	-	-	-	-	SM00287;Bacterial SH3 domain homologues	-	-	TMhelix;Region of a membrane-bound protein predicted to be embedded in the membrane.	Aspartyl-tRNA synthetase	aproNOG	S	1	27	416	-0.90452	0.193014	461.022	642.314	1173.59	6.66759e-06	0.0272204	9.9261	0
BHCHEMG|NC_005956_173416_173252_-1_GTG_54	NC_005956	173252	173416	-1	GTG	162	1				173252..173416(-)		ORF_173252..173422_56aa_-1			54	Unknown	0		CYT	-	-	-	-	-	-	-	-	-	-	-	-				0	0	0	NA	NA	0	0	0
BH_RS00640|rso|ens|geno|prod|NC_005956_175006_174773_-1_GTG_77	NC_005956	174773	175006	-1	GTG	231	0	BH_RS00640	BH01320	BH01320		NC_005956_01340	ORF_174773..174946_57aa_-1	n to n	BHPROD|MQB277_172501_172268_-3_GTG_77	77	Unknown	0		CYT	-	PTHR21109	PF01165;Ribosomal protein S21	-	PR00976;Ribosomal protein S21 family signature	PS01181;Ribosomal protein S21 signature.	-	-	-	-	TIGR00030;S21p: ribosomal protein bS21	-	30S ribosomal protein S21	aproNOG	J	1	35	710	-0.765763	0.192199	2124.69	1490.25	4529.76	1.13864	0	0.00682056	9.98332
BHGENOBH01330_fCDS1_p|chemg|prod|NC_005956_175442_175308_-3_ATG_44	NC_005956	175308	175442	-3	ATG	132	1		BH01330(p)	BH01330(p)	175308..175442(-)	NC_005956_01350	ORF_175308..175442_44aa_-3	p to p	BHPROD|MQB277_172937_172803_-2_ATG_44	44	Unknown	0		CYT	G3DSA:3.40.50.300	PTHR10025,PTHR10025:SF5	PF01268;Formate--tetrahydrofolate ligase	-	-	-	-	-	-	SSF52540	-	TMhelix;Region of a membrane-bound protein predicted to be embedded in the membrane.	Formate-tetrahydrofolate ligase	proNOG	F	0	0	0	NA	NA	14.5828	17.6327	32.8609
BHGENOBH01330-2_fCDS2_p|chemg|prod|NC_005956_176206_175589_-1_ATG_205	NC_005956	175589	176206	-1	ATG	615	1	BH_RS00645(p)	BH01330(p)	BH01330-2(p)	175589..176206(-)	NC_005956_01360	ORF_175589..176206_205aa_-1	p to p	BHPROD|MQB277_173701_173084_-3_ATG_205	205	CytoplasmicMembrane	1		CYT	G3DSA:3.30.1510.10	-	PF01268;Formate--tetrahydrofolate ligase	-	-	-	-	-	-	SSF52540	-	-	Formyltetrahydrofolate synthetase	aproNOG	F	0	0	0	NA	NA	42.2413	40.6021	114.565
BHCHEMG|NC_005956_175551_175808_+3_ATG_85	NC_005956	175551	175808	+3	ATG	255	1		BH01330(p)		175551..175808(+)		ORF_175551..175808_85aa_+3	p to p		85	Unknown	0		CYT	G3DSA:3.40.50.300	-	PF01268;Formate--tetrahydrofolate ligase	-	-	-	-	-	-	SSF52540	-	-	Formyltetrahydrofolate synthetase	aproNOG	F	0	0	0	NA	NA	3.48399	2.55573	8.15071
BHGENOBH01330-3_fCDS3_p|chemg|NC_005956_176390_176211_-3_ATG_59	NC_005956	176211	176390	-3	ATG	177	1	BH_RS00645(p)	BH01330(p)	BH01330-3(p)	176211..176390(-)		ORF_176211..176390_59aa_-3	p to p		59	Unknown	0		CYT	G3DSA:3.30.1510.10	-	PF01268;Formate--tetrahydrofolate ligase	-	-	-	-	-	-	SSF52540	-	-	Formyltetrahydrofolate synthetase	aproNOG	F	0	0	0	NA	NA	18.7153	7.81753	44.1585
BHGENOBH01330-4_fCDS4_p|NC_005956_176542_176429_-1_ATG_37	NC_005956	176429	176542	-1	ATG	111	1	BH_RS00645(p)	BH01330(p)	BH01330-4(p)			ORF_176429..176542_37aa_-1	p to p		37	Unknown	0		CYT	G3DSA:3.40.50.300	-	PF01268;Formate--tetrahydrofolate ligase	-	-	-	-	-	-	-	-	-	Formyltetrahydrofolate synthetase	aproNOG	F	0	0	0	NA	NA	3.86298	1.25861	10.0027
BHGENOBH01330-5_fCDS5_p|NC_005956_176620_176552_-1_TTG_22	NC_005956	176552	176620	-1	TTG	66	1	BH_RS00645(p)	BH01330(p)	BH01330-5(p)			ORF_176552..176620_22aa_-1	p to p		22	Unknown	0		CYT	G3DSA:3.40.50.300	-	PF01268;Formate--tetrahydrofolate ligase	-	-	-	-	-	-	-	-	-	Formyltetrahydrofolate synthetase	aproNOG	F	0	0	0	NA	NA	26.1937	36.7347	28.6531
BHGENOBH01330-6_fCDS6_p|prod|NC_005956_176907_176755_-2_ATG_50	NC_005956	176755	176907	-2	ATG	150	1	BH_RS00645(p)	BH01330(p)	BH01330-6(p)		NC_005956_01370	ORF_176755..176907_50aa_-2	p to p	BHPROD|MQB277_174402_174250_-1_ATG_50	50	Unknown	0		CYT	-	-	-	-	-	-	-	-	-	-	-	-	Formyltetrahydrofolate synthetase	aproNOG	F	0	0	0	NA	NA	12.8957	13.1136	30.8017
BHCHEMG|NC_005956_177422_177619_+2_ATG_65	NC_005956	177422	177619	+2	ATG	195	0				177422..177619(+)		ORF_177422..177619_65aa_+2			65	Unknown	0		CYT	-	-	-	-	-	-	-	-	-	-	-	-				0	0	0	NA	NA	300.444	171.994	1014.56
BHCHEMG|NC_005956_178429_178193_-1_TTG_78	NC_005956	178193	178429	-1	TTG	234	1				178193..178429(-)		ORF_178193..178321_42aa_-1			78	Unknown	0	yes	SpI	-	-	-	-	-	-	-	-	-	-	-	-				0	0	0	NA	NA	0	0	0
BH_RS00655|rso|ens|geno|chemg|prod|NC_005956_177993_179135_+3_ATG_380	NC_005956	177993	179135	+3	ATG	1140	0	BH_RS00655	BH01350	BH01350	177993..179135(+)	NC_005956_01390	ORF_177993..179135_380aa_+3	n to n	BHPROD|MQB277_175488_176630_+3_ATG_380	380	CytoplasmicMembrane	1		CYT	G3DSA:2.40.50.100	PTHR30469	PF12700;HlyD family secretion protein	-	-	-	-	-	-	SSF111369	TIGR01730;RND_mfp: efflux transporter, RND family, MFP subunit	TMhelix;Region of a membrane-bound protein predicted to be embedded in the membrane.	efflux transporter, rnd family, mfp subunit	aproNOG	M	1	40	424	-0.155602	0.82525	2120.8	3421.88	4572.23	10	0	9.9261	0	IM predominant
BH_RS00660|rso|ens|geno|chemg|prod|NC_005956_179132_182266_+2_ATG_1044	NC_005956	179132	182266	+2	ATG	3132	0	BH_RS00660	BH01360	BH01360	179132..182266(+)	NC_005956_01400	ORF_179132..182266_1044aa_+2	n to n	BHPROD|MQB277_176627_179761_+2_ATG_1044	1044	CytoplasmicMembrane	14		CYT	G3DSA:1.10.3850.10,G3DSA:3.30.2090.10,G3DSA:3.30.70.1430,G3DSA:1.20.1640.10	PTHR32063	PF00873;AcrB/AcrD/AcrF family	-	PR00702;Acriflavin resistance protein family signature	-	-	-	-	SSF82866,SSF82714,SSF82693	-	TMhelix;Region of a membrane-bound protein predicted to be embedded in the membrane.	acriflavin resistance protein	aproNOG	P	1	47	557	-0.358364	0.56843	1123.01	1239.12	2657.44	10	0	9.98631	0	IM predominant
BHCHEMG|NC_005956_182537_182346_-3_ATG_63	NC_005956	182346	182537	-3	ATG	189	1				182346..182537(-)		ORF_182346..182537_63aa_-3			63	Unknown	0		CYT	-	-	-	-	-	-	-	-	-	-	-	-				0	0	0	NA	NA	74.759	103.001	140.082
BHCHEMG|NC_005956_184247_183993_-3_ATG_84	NC_005956	183993	184247	-3	ATG	252	0				183993..184247(-)		ORF_183993..184247_84aa_-3			84	CytoplasmicMembrane	0		CYT	-	-	-	-	-	-	-	-	-	-	-	-				0	0	0	NA	NA	103.41	76.3456	211.842
BHCHEMG|NC_005956_184239_184087_-2_GTG_50	NC_005956	184087	184239	-2	GTG	150	0				184087..184239(-)		ORF_184087..184215_42aa_-2			50	Unknown	0		CYT	-	-	-	-	-	-	-	-	-	-	-	-				0	0	0	NA	NA	0	0	0
BH_RS00665|+5aa_rso|prod|NC_005956_182464_184128_+1_ATG_554	NC_005956	182464	184128	+1	ATG	1662	0	BH_RS00665	BH01370	BH01370	182449..184128(+)	NC_005956_01410	ORF_182449..184128_559aa_+1	n to n	BHPROD|MQB277_179959_181623_+1_ATG_554	554	Cytoplasmic	0		CYT	G3DSA:3.40.50.10490,G3DSA:1.10.1390.10	PTHR11469	PF00342;Phosphoglucose isomerase	-	PR00662;Glucose-6-phosphate isomerase signature	PS00174;Phosphoglucose isomerase signature 2.,PS00765;Phosphoglucose isomerase signature 1.	PS51463;Glucose-6-phosphate isomerase family profile.	-	-	SSF53697	-	-	Phosphohexose isomerase	aproNOG	G	1	23	155	1.53671	0.11691	3654.13	4636.98	8131.25	3.6067e-06	3.05034	5.95	9.70187e-08
BH_RS00675|rso|ens|geno|chemg|prod|NC_005956_184541_185017_+2_ATG_158	NC_005956	184541	185017	+2	ATG	474	0	BH_RS00675	BH01390	BH01390	184541..185017(+)	NC_005956_01430	ORF_184541..185017_158aa_+2	n to n	BHPROD|MQB277_182036_182512_+2_ATG_158	158	Cytoplasmic	0		CYT	-	PTHR21349	PF00829;Ribosomal prokaryotic L21 protein	-	-	-	-	-	-	SSF141091	TIGR00061;L21: ribosomal protein bL21	-	This protein binds to 23S rRNA in the presence of protein L20 (By similarity)	aproNOG	J	1	67	1665	0.488847	0.309723	5422.39	4342.97	10579.4	0	1.55595	0.797421	8.92554
BHCHEMG|NC_005956_185393_185238_-3_ATG_51	NC_005956	185238	185393	-3	ATG	153	1				185238..185393(-)		ORF_185238..185393_51aa_-3			51	Unknown	0	yes	CYT	-	-	-	-	-	-	-	-	-	-	-	-				0	0	0	NA	NA	103.173	31.8093	234.044
BH_RS00680|rso|ens|geno|chemg|prod|NC_005956_185032_185301_+1_ATG_89	NC_005956	185032	185301	+1	ATG	267	0	BH_RS00680	BH01400	BH01400	185032..185301(+)	NC_005956_01440	ORF_185032..185301_89aa_+1	n to n	BHPROD|MQB277_182527_182796_+1_ATG_89	89	Cytoplasmic	0		CYT	G3DSA:2.40.50.100	PTHR15893	PF01016;Ribosomal L27 protein	-	PR00063;Ribosomal protein L27 signature	PS00831;Ribosomal protein L27 signature.	-	-	-	SSF110324	TIGR00062;L27: ribosomal protein bL27	-	50S ribosomal protein L27	aproNOG	J	1	27	478	-0.444045	0.50043	2510.82	1203.65	6073.95	2.25136e-06	0.0237391	9.24943	2.75152e-05
BHGENO0160|NC_005956_185555_185701_+2_GTG_48	NC_005956	185555	185701	+2	GTG	144	1			BARHE0160			ORF_185555..185701_48aa_+2			48	Unknown	0		CYT	-	-	-	-	-	-	-	-	-	-	-	-				0	0	0	NA	NA	86.0183	75.6769	178.392
BHGENO0161|prod|NC_005956_185622_185792_+3_GTG_56	NC_005956	185622	185792	+3	GTG	168	1			BARHE0161		NC_005956_01450	ORF_185718..185792_24aa_+3		BHPROD|MQB277_183117_183287_+3_GTG_56	56	Unknown	0		CYT	-	-	-	-	-	-	-	-	-	-	-	-				0	0	0	NA	NA	172.793	314.12	334.643
BHCHEMG|NC_005956_185919_186047_+3_ATG_42	NC_005956	185919	186047	+3	ATG	126	1				185919..186047(+)		ORF_185919..186047_42aa_+3			42	Unknown	1		CYT	-	-	-	-	-	-	-	-	-	-	-	-				0	0	0	NA	NA	140.853	162.491	316.399
BHGENO0162|-15aa_chemg|NC_005956_185983_186198_+1_GTG_71	NC_005956	185983	186198	+1	GTG	213	1			BARHE0162	186028..186198(+)		ORF_186028..186198_56aa_+1			71	Unknown	0		CYT	-	-	-	-	-	-	-	-	-	-	-	-				0	0	0	NA	NA	0	0	0
BHCHEMG|NC_005956_186032_186283_+2_GTG_83	NC_005956	186032	186283	+2	GTG	249	1				186032..186283(+)		ORF_186095..186283_62aa_+2			83	CytoplasmicMembrane	1		CYT	-	-	-	-	-	-	-	-	-	-	-	TMhelix;Region of a membrane-bound protein predicted to be embedded in the membrane.				0	0	0	NA	NA	156.169	208.812	220.607
BHPROD|NC_005956_186305_186454_+2_ATG_49	NC_005956	186305	186454	+2	ATG	147	1					NC_005956_01460	ORF_186305..186454_49aa_+2		BHPROD|MQB277_183800_183949_+2_ATG_49	49	CytoplasmicMembrane	0		CYT	-	-	-	-	-	-	-	-	-	-	-	-				0	0	0	NA	NA	62.8018	53.3514	130.885
BH_RS00685|rso|ens|geno|+47aa_chemg|prod|NC_005956_186721_189225_+1_ATG_834	NC_005956	186721	189225	+1	ATG	2502	1	BH_RS00685	BH01410	BH01410	186580..189225(+)	NC_005956_01470	ORF_186580..189225_881aa_+1	n to n	BHPROD|MQB277_184216_186720_+1_ATG_834	834	Cytoplasmic	0		CYT	G3DSA:3.50.30.10,G3DSA:3.30.1340.10,G3DSA:3.20.20.60,G3DSA:3.40.930.10,G3DSA:1.10.274.10	PTHR22931:SF15,PTHR22931	PF00381;PTS HPr component phosphorylation site,PF00359;Phosphoenolpyruvate-dependent sugar phosphotransferase system, EIIA 2,PF05524;PEP-utilising enzyme, N-terminal,PF00391;PEP-utilising enzyme, mobile domain,PF02896;PEP-utilising enzyme, TIM barrel domain	-	PR01736;Phosphoenolpyruvate-protein phosphotransferase signature,PR00107;Phosphocarrier protein signature	PS00742;PEP-utilizing enzymes signature 2.,PS00369;PTS HPR domain histidine phosphorylation site signature.,PS00372;PTS EIIA domains phosphorylation site signature 2.	PS51094;PTS_EIIA type-2 domain profile.,PS51350;PTS HPR domain profile.	-	-	SSF55594,SSF52009,SSF55804,SSF51621,SSF47831	TIGR01417;PTS_I_fam: phosphoenolpyruvate-protein phosphotransferase	-	General (non sugar-specific) component of the phosphoenolpyruvate-dependent sugar phosphotransferase system (sugar PTS). This major carbohydrate active-transport system catalyzes the phosphorylation of incoming sugar substrates concomitantly with their translocation across the cell membrane. Enzyme I transfers the phosphoryl group from phosphoenolpyruvate (PEP) to the phosphoryl carrier protein (…	aproNOG	G	1	48	499	0.240346	0.709505	1018.11	1264.39	2450.85	9.2352	0	10	4.30629e-07	IM predominant
BHGENO0164|NC_005956_189486_189623_+3_ATG_45	NC_005956	189486	189623	+3	ATG	135	1			BARHE0164			ORF_189486..189623_45aa_+3			45	Unknown	1		CYT	-	-	-	-	-	-	-	-	-	-	-	-				0	0	0	NA	NA	26.0081	23.2037	64.7522
BHCHEMG|NC_005956_190058_190264_+2_GTG_68	NC_005956	190058	190264	+2	GTG	204	1				190058..190264(+)		ORF_190109..190264_51aa_+2			68	Unknown	0	yes	CYT	-	-	-	-	-	-	-	-	-	-	-	-				0	0	0	NA	NA	221.868	135.088	460.193
BHGENO0165|NC_005956_190472_190591_+2_CTG_39	NC_005956	190472	190591	+2	CTG	117	1			BARHE0165			ORF_190472..190591_39aa_+2			39	Unknown	0		CYT	-	-	-	-	-	-	-	-	-	-	-	-				0	0	0	NA	NA	13.805	10.1869	28.7271
BHGENO0166|NC_005956_190960_190775_-1_ATG_61	NC_005956	190775	190960	-1	ATG	183	1			BARHE0166			ORF_190775..190960_61aa_-1			61	Unknown	0		CYT	-	-	-	-	-	-	-	-	-	-	-	-				0	0	0	NA	NA	16.7842	18.3383	34.8001
BHCHEMG|NC_005956_190990_191112_+1_ATG_40	NC_005956	190990	191112	+1	ATG	120	1				190990..191112(+)		ORF_190990..191112_40aa_+1			40	Unknown	0		CYT	-	-	-	-	-	-	-	-	-	-	-	-				0	0	0	NA	NA	125.259	92.6694	292.232
BHGENO0167|NC_005956_191580_191440_-2_TTG_46	NC_005956	191440	191580	-2	TTG	138	1			BARHE0167			ORF_191440..191580_46aa_-2			46	Unknown	0		CYT	-	-	-	-	-	-	-	-	-	-	-	-	NA	aproNOG	S	0	0	0	NA	NA	1.05587	0.083965	1.59534
BHGENO0168|chemg|prod|NC_005956_191482_191961_+1_ATG_159	NC_005956	191482	191961	+1	ATG	477	1	BH_RS00695(p)		BARHE0168	191482..191961(+)	NC_005956_01490	ORF_191482..191961_159aa_+1	0 to p	BHPROD|MQB277_188977_189456_+1_ATG_159	159	CytoplasmicMembrane	5		TMH	G3DSA:1.20.1250.20	-	-	-	-	-	-	-	-	SSF103473	-	TMhelix;Region of a membrane-bound protein predicted to be embedded in the membrane.	Major Facilitator Superfamily	aproNOG	G	0	0	0	NA	NA	25.3011	22.9124	59.5999
BHGENO0169|NC_005956_191955_192083_+3_CTG_42	NC_005956	191955	192083	+3	CTG	126	1	BH_RS00695(p)		BARHE0169			ORF_192012..192083_23aa_+3	0 to p		42	Unknown	1		CYT	-	-	-	-	-	-	-	-	-	-	-	-	Major Facilitator	proNOG	G	0	0	0	NA	NA	6.19394	4.34642	10.7755
BHCHEMG|NC_005956_192257_192138_-3_ATG_39	NC_005956	192138	192257	-3	ATG	117	1	BH_RS00695(p)			192138..192257(-)		ORF_192138..192257_39aa_-3	0 to p		39	Unknown	0		CYT	-	-	-	-	-	-	-	-	-	-	-	-				0	0	0	NA	NA	2.13575	0.47192	2.3596
BH_RS00695_p_-176aa_geno|NC_005956_192190_192336_+1_TTG_48	NC_005956	192190	192336	+1	TTG	144	1	BH_RS00695(p)		BARHE0170			ORF_192211..192336_41aa_+1	0 to p		48	CytoplasmicMembrane	1	yes	TMH	-	-	-	-	-	-	-	-	-	-	-	TMhelix;Region of a membrane-bound protein predicted to be embedded in the membrane.	Major Facilitator	proNOG	G	0	0	0	NA	NA	8.14452	0.535799	17.1456
BHPROD|NC_005956_192374_192514_+2_ATG_46	NC_005956	192374	192514	+2	ATG	138	1					NC_005956_01500	ORF_192374..192514_46aa_+2		BHPROD|MQB277_189869_190009_+2_ATG_46	46	Unknown	1		CYT	-	-	-	-	-	-	-	-	-	-	-	TMhelix;Region of a membrane-bound protein predicted to be embedded in the membrane.				0	0	0	NA	NA	23.1573	12.6334	63.1668
BH_RS00700|rso|ens|geno|+10aa_chemg|prod|NC_005956_193124_192843_-3_ATG_93	NC_005956	192843	193124	-3	ATG	279	1	BH_RS00700	BH01430	BH01430	192843..193154(-)	NC_005956_01510	ORF_192843..193154_103aa_-3	n to n	BHPROD|MQB277_190619_190338_-2_ATG_93	93	Unknown	0		CYT	-	-	-	-	-	-	-	-	-	-	-	-				1	7	45	-1.97425	0.343769	250.985	363.052	380.458	8.41684	0.000246167	6.77624	1.14384	IM predominant
BHRSO01440|ens|geno|chemg|prod|NC_005956_193584_193105_-2_ATG_159	NC_005956	193105	193584	-2	ATG	477	1	BH_RS08425(p)	BH01440	BH01440	193105..193584(-)	NC_005956_01520	ORF_193105..193584_159aa_-2	n to p		159	Unknown	0		CYT	G3DSA:1.10.1180.10	-	-	-	-	-	-	-	-	-	-	-	DNA transposition protein	aproNOG	L	0	0	0	NA	NA	585.031	638.748	1200.87
BH_RS00710|rso|ens|geno|prod|NC_005956_193946_193653_-3_ATG_97	NC_005956	193653	193946	-3	ATG	291	1	BH_RS00710	BH01450	BH01450		NC_005956_01530	ORF_193653..193946_97aa_-3	n to n	BHPROD|MQB277_191441_191148_-2_ATG_97	97	Unknown	0		CYT	G3DSA:1.10.260.40	-	-	-	-	-	-	-	-	SSF47413	-	-	NA	aproNOG	S	0	0	0	NA	NA	106.423	113.583	243.918
BH_RS00715|rso|ens|geno|chemg|prod|NC_005956_194092_194595_+1_TTG_167	NC_005956	194092	194595	+1	TTG	501	1	BH_RS00715	BH01460	BH01460	194092..194595(+)	NC_005956_01540	ORF_194320..194595_91aa_+1	n to n	BHPROD|MQB277_191587_192090_+1_TTG_167	167	Cytoplasmic	0		CYT	G3DSA:1.10.260.40	-	PF12844;Helix-turn-helix domain	-	-	-	PS50943;Cro/C1-type HTH domain profile.	-	SM00530;Helix-turn-helix XRE-family like proteins	SSF47413	-	-	HTH_XRE	aproNOG	K	1	9	42	0.603822	0.769394	1173.79	985.256	2808.19	0.000610352	9.375	2.55	0	Cyt predominant
BH_RS00720|rso|ens|geno|prod|NC_005956_195150_194851_-2_ATG_99	NC_005956	194851	195150	-2	ATG	297	1	BH_RS00720	BH01470	BH01470		NC_005956_01550	ORF_194851..195150_99aa_-2	n to n	BHPROD|MQB277_192645_192346_-1_ATG_99	99	Unknown	0		CYT	G3DSA:1.10.260.40	-	-	-	-	-	-	-	-	-	-	-	NA	aproNOG	S	0	0	0	NA	NA	345.588	496.324	640.957
BH_RS00725|rso|ens|geno|+3aa_chemg|prod|NC_005956_195297_195839_+3_TTG_180	NC_005956	195297	195839	+3	TTG	540	1	BH_RS00725	BH01480	BH01480	195288..195839(+)	NC_005956_01560	ORF_195528..195839_103aa_+3	n to n	BHPROD|MQB277_192792_193334_+3_TTG_180	180	Cytoplasmic	0		CYT	G3DSA:1.10.260.40	-	PF12844;Helix-turn-helix domain	-	-	-	PS50943;Cro/C1-type HTH domain profile.	-	SM00530;Helix-turn-helix XRE-family like proteins	SSF47413	-	-	HTH_XRE	aproNOG	K	1	12	71	-0.238226	0.892678	752.672	649.58	1532.77	5.54792e-10	9.99799	3.7995	0	Cyt predominant
BH_RS00730|-19aa_geno|chemg|prod|NC_005956_196081_196275_+1_ATG_64	NC_005956	196081	196275	+1	ATG	192	1	BH_RS00730		BARHE0177	196081..196275(+)	NC_005956_01570	ORF_196081..196275_64aa_+1	0 to n	BHPROD|MQB277_193576_193770_+1_ATG_64	64	Unknown	0		CYT	-	-	-	-	-	-	-	-	-	-	-	-				0	0	0	NA	NA	92.2147	82.2857	214.321
BH_RS00735|rso|ens|geno|+6aa_chemg|prod|NC_005956_196976_202156_+2_ATG_1726	NC_005956	196976	202156	+2	ATG	5178	0	BH_RS00735	BH01490	BH01490	196958..202156(+)	NC_005956_01580	ORF_196976..202156_1726aa_+2	n to n	BHPROD|MQB277_194471_199651_+2_ATG_1726	1726	Extracellular	0	yes	SpI	G3DSA:3.30.1300.30,G3DSA:2.150.10.10,G3DSA:1.20.5.170	-	PF05662;Coiled stalk of trimeric autotransporter adhesin,PF05658;Head domain of trimeric autotransporter adhesin,PF03895;YadA-like C-terminal region	-	-	-	-	SignalP-noTM	-	SSF101967,SSF54523	-	TMhelix;Region of a membrane-bound protein predicted to be embedded in the membrane.	surface protein	aproNOG	UW	1	603	12381	1.33251	0.00140299	49284.9	35611.2	114600	0	9.9557	0	10	Cyt predominant
BHCHEMG|NC_005956_202827_202591_-2_TTG_78	NC_005956	202591	202827	-2	TTG	234	1				202591..202827(-)		ORF_202591..202746_51aa_-2			78	Unknown	0		CYT	-	-	-	-	-	-	-	-	-	-	-	TMhelix;Region of a membrane-bound protein predicted to be embedded in the membrane.				0	0	0	NA	NA	670.729	1356.29	1077.23
BHGENO0179|NC_005956_202574_202711_+2_GTG_45	NC_005956	202574	202711	+2	GTG	135	1			BARHE0179			ORF_202634..202711_25aa_+2			45	CytoplasmicMembrane	1		TMH	-	-	-	-	-	-	-	-	-	-	-	TMhelix;Region of a membrane-bound protein predicted to be embedded in the membrane.				0	0	0	NA	NA	0.442945	0.477396	0.409197
BH_RS00740|geno|+2aa_chemg|prod|NC_005956_203509_203856_+1_TTG_115	NC_005956	203509	203856	+1	TTG	345	1	BH_RS00740		BARHE0180	203503..203856(+)	NC_005956_01590	ORF_203698..203856_52aa_+1	0 to n	BHPROD|MQB277_201004_201351_+1_TTG_115	115	Unknown	0	yes	CYT	-	-	-	-	-	-	-	-	-	-	-	-				0	0	0	NA	NA	8.67982	11.0913	17.1372
BHGENO0181|NC_005956_203930_204088_+2_ATG_52	NC_005956	203930	204088	+2	ATG	156	1			BARHE0181			ORF_203930..204088_52aa_+2		BHPROD|MQB277_201425_201583_+2_ATG_52	52	Unknown	0		CYT	-	-	-	-	-	-	-	-	-	-	-	-				0	0	0	NA	NA	25.483	26.1818	63.1837
BH_RS00745|rso|ens|geno|chemg|prod|NC_005956_204160_204621_+1_TTG_153	NC_005956	204160	204621	+1	TTG	459	0	BH_RS00745	BH01500	BH01500	204160..204621(+)	NC_005956_01600	ORF_204250..204621_123aa_+1	n to n	BHPROD|MQB277_201655_202116_+1_TTG_153	153	Unknown	0		CYT	G3DSA:3.30.1300.30	-	PF03895;YadA-like C-terminal region	-	-	-	-	-	-	SSF54523	-	-	surface protein	aproNOG	UW	0	0	0	NA	NA	1730.62	2912.72	3235.03
BHORF|NC_005956_209240_209308_+2_ATG_22	NC_005956	209240	209308	+2	ATG	66	6						ORF_209240..209308_22aa_+2		BHORF|MQB277_206735_206803_+2_ATG_22	22	Unknown	0		CYT	-	-	-	-	-	-	-	-	-	-	-	-				1	2	10	-0.118644	1	0	0	0	2.5	0	4.58823	0	IM exclusive
BHRSO01510|ens|geno|+15aa_chemg|prod|NC_005956_205378_214488_+1_ATG_3036	NC_005956	205378	214488	+1	ATG	9108	1		BH01510	BH01510	205333..214488(+)	NC_005956_01610	ORF_205333..214488_3051aa_+1	n to 0		3036	OuterMembrane	0	yes	SpI	G3DSA:1.20.5.170,G3DSA:2.150.10.10	-	PF05662;Coiled stalk of trimeric autotransporter adhesin	-	-	-	-	-	-	SSF101967	-	-	surface protein	aproNOG	UW	1	92	678	1.11541	0.054393	27975.8	16673	104159	0	10	6.74699	1.76288	Cyt predominant
BH_RS08430_p_-23aa_rso|ens|geno|prod|NC_005956_214443_214646_+3_TTG_67	NC_005956	214443	214646	+3	TTG	201	0	BH_RS08430(p)	BH01520	BH01520		NC_005956_01620	ORF_214443..214646_67aa_+3	n to p		67	Unknown	0		SpI	G3DSA:3.30.1300.30	-	PF03895;YadA-like C-terminal region	-	-	-	-	-	-	SSF54523	-	-	surface protein	aproNOG	UW	0	0	0	NA	NA	124.985	134.121	240.729
BH_RS00755|-6aa_rso|+13aa_chemg|+1aa_prod|NC_005956_214646_215236_+2_ATA_196	NC_005956	214646	215236	+2	ATA	588	0	BH_RS00755	BH01530	BH01530	214607..215236(+)	NC_005956_01630	ORF_214643..215236_197aa_+2	n to n		196	Unknown	0	yes	SpI	-	-	PF06776;Invasion associated locus B (IalB) protein	-	-	-	-	-	-	-	-	-	invasion associated locus B family protein	aproNOG	S	1	7	44	0.203284	0.938723	161.203	171.314	390.052	7.63912	0.00488281	5.94721	0	IM exclusive
BH_RS00760_p_+95aa_rso|ens|geno|chemg|prod|NC_005956_216149_217459_+2_ATG_436	NC_005956	216149	217459	+2	ATG	1308	0	BH_RS00760(p)	BH01540	BH01540	216149..217459(+)	NC_005956_01640	ORF_216149..217459_436aa_+2	n to p	BHPROD|MQB277_237151_238461_+1_ATG_436	436	Cytoplasmic	0		CYT	G3DSA:3.30.420.40,G3DSA:3.30.420.150	PTHR30005	PF02541;Ppx/GppA phosphatase family	-	-	-	-	-	-	SSF53067	-	-	ppx gppa phosphatase	aproNOG	T	1	11	31	NA	NA	132.205	180.274	304.92	9.89977	0	3.33673	0.822752	TM exclusive
BH_RS00765|rso|ens|geno|chemg|prod|NC_005956_217493_218236_+2_ATG_247	NC_005956	217493	218236	+2	ATG	741	0	BH_RS00765	BH01550	BH01550	217493..218236(+)	NC_005956_01650	ORF_217493..218236_247aa_+2	n to n	BHPROD|MQB277_238495_239238_+1_ATG_247	247	Cytoplasmic	0		CYT	G3DSA:3.40.50.150	PTHR10920	PF01728;FtsJ-like methyltransferase	PIRSF005461	-	-	-	-	-	SSF53335	-	-	Specifically methylates the uridine in position 2552 of 23S rRNA at the 2'-O position of the ribose in the fully assembled 50S ribosomal subunit (By similarity)	aproNOG	J	1	4	11	1.88136	0.701036	86.641	103.497	251.052	4.375	0	4.79823	0	IM exclusive
BHGENO0188|NC_005956_218348_218506_+2_GTG_52	NC_005956	218348	218506	+2	GTG	156	1			BARHE0188			ORF_218357..218506_49aa_+2			52	Unknown	0		CYT	-	-	-	-	-	-	-	-	-	-	-	-				0	0	0	NA	NA	31.4546	31.0468	81.6787
BH_RS00770|geno|prod|NC_005956_218817_218593_-2_ATG_74	NC_005956	218593	218817	-2	ATG	222	1	BH_RS00770		BARHE0189		NC_005956_01660	ORF_218593..218817_74aa_-2	0 to n	BHPROD|MQB277_239819_239595_-2_ATG_74	74	Unknown	1		CYT	-	-	-	-	-	-	-	-	-	-	-	TMhelix;Region of a membrane-bound protein predicted to be embedded in the membrane.				0	0	0	NA	NA	669.06	752.659	1604.74
BH_RS00775|rso|ens|geno|chemg|prod|NC_005956_219209_220231_+2_ATG_340	NC_005956	219209	220231	+2	ATG	1020	0	BH_RS00775	BH01560	BH01560	219209..220231(+)	NC_005956_01670	ORF_219209..220231_340aa_+2	n to n	BHPROD|MQB277_240211_241233_+1_ATG_340	340	Cytoplasmic	0		CYT	G3DSA:3.40.50.300,G3DSA:2.70.210.12	PTHR11702,PTHR11702:SF3	PF01926;50S ribosome-binding GTPase,PF01018;GTP1/OBG	PIRSF002401	PR00326;GTP1/OBG GTP-binding protein family signature	PS00905;GTP1/OBG family signature.	PS51710;OBG-type guanine nucleotide-binding (G) domain profile.	-	-	SSF82051,SSF52540	TIGR02729;Obg_CgtA: Obg family GTPase CgtA	-	An essential GTPase which binds GTP, GDP and possibly (p)ppGpp with moderate affinity, with high nucleotide exchange rates and a fairly low GTP hydrolysis rate. It may play a role in control of the cell cycle, stress response, ribosome biogenesis and in those bacteria that undergo differentiation, in morphogenesis control (By similarity)	aproNOG	S	1	33	577	0.0789555	0.902371	361.59	382.61	840.016	8.03004	0	10	1.08358e-13	IM predominant
BH_RS00780|rso|ens|geno|+3aa_chemg|prod|NC_005956_220237_221376_+1_ATG_379	NC_005956	220237	221376	+1	ATG	1137	0	BH_RS00780	BH01570	BH01570	220228..221376(+)	NC_005956_01680	ORF_220237..221376_379aa_+1	n to n	BHPROD|MQB277_241239_242378_+3_ATG_379	379	Cytoplasmic	0		CYT	G3DSA:2.30.130.10,G3DSA:3.40.1160.10	PTHR11063:SF6,PTHR11063	PF00696;Amino acid kinase family,PF01472;PUA domain	PIRSF000729	PR00474;Glutamate 5-kinase family signature	PS00902;Glutamate 5-kinase signature.	PS50890;PUA domain profile.	-	SM00359;Putative RNA-binding Domain in PseudoUridine synthase and Archaeosine transglycosylase	SSF53633,SSF88697	TIGR01027;proB: glutamate 5-kinase	-	Catalyzes the transfer of a phosphate group to glutamate to form glutamate 5-phosphate which rapidly cyclizes to 5- oxoproline (By similarity)	aproNOG	E	1	30	372	0.450805	0.521203	269.416	430.964	525.221	0	10	6.68726	0.0160586	Cyt predominant
BH_RS00785|-6aa_rso|+19aa_chemg|prod|NC_005956_221426_222682_+2_ATG_418	NC_005956	221426	222682	+2	ATG	1254	0	BH_RS00785	BH01580	BH01580	221369..222682(+)	NC_005956_01690	ORF_221426..222682_418aa_+2	n to n	BHPROD|MQB277_242428_243684_+1_ATG_418	418	Cytoplasmic	0		CYT	G3DSA:3.40.309.10,G3DSA:3.40.605.10	PTHR11063	PF00171;Aldehyde dehydrogenase family	PIRSF000151	-	PS01223;Gamma-glutamyl phosphate reductase signature.	-	-	-	SSF53720	TIGR00407;proA: glutamate-5-semialdehyde dehydrogenase	-	Catalyzes the NADPH dependent reduction of L-gamma- glutamyl 5-phosphate into L-glutamate 5-semialdehyde and phosphate. The product spontaneously undergoes cyclization to form 1-pyrroline-5-carboxylate (By similarity)	aproNOG	E	1	32	362	-0.0656956	0.935996	227.728	362.073	418.162	5.67858	1.1061e-10	9.99998	5.6723e-06	IM predominant
BH_RS00790|rso|ens|geno|+11aa_chemg|prod|NC_005956_222712_223305_+1_ATG_197	NC_005956	222712	223305	+1	ATG	591	0	BH_RS00790	BH01590	BH01590	222679..223305(+)	NC_005956_01700	ORF_222712..223305_197aa_+1	n to n	BHPROD|MQB277_243714_244307_+3_ATG_197	197	CytoplasmicMembrane	0		CYT	G3DSA:3.40.50.620	-	PF01467;Cytidylyltransferase	-	-	-	-	-	-	SSF52374	-	-	Catalyzes the reversible adenylation of nicotinate mononucleotide (NaMN) to nicotinic acid adenine dinucleotide (NaAD) (By similarity)	aproNOG	H	1	8	35	0.54878	0.817402	310.399	315.755	622.694	8.22021	0	4.43605	0.237134	TM exclusive
BH_RS00795|-5aa_rso|chemg|NC_005956_223639_224082_+1_ATG_147	NC_005956	223639	224082	+1	ATG	441	0	BH_RS00795	BH01600	BH01600	223639..224082(+)	NC_005956_01710	ORF_223639..224082_147aa_+1	n to n	BHPROD|MQB277_244656_245084_+3_ATG_142	147	Cytoplasmic	0		CYT	G3DSA:3.30.460.10	PTHR21043	PF02410;Oligomerisation domain	-	-	-	-	-	-	SSF81301	TIGR00090;rsfS_iojap_ybeB: ribosome silencing factor	-	Functions as a ribosomal silencing factor. Interacts with ribosomal protein L14 (rplN), blocking formation of intersubunit bridge B8. Prevents association of the 30S and 50S ribosomal subunits and the formation of functional ribosomes, thus repressing translation (By similarity)	aproNOG	S	1	8	132	1.46632	0.163853	763.097	1119.63	1570.68	9.99981	0	9.39196	2.22496e-05	IM predominant
BH_RS00800|rso|ens|geno|chemg|prod|NC_005956_224084_224566_+2_ATG_160	NC_005956	224084	224566	+2	ATG	480	0	BH_RS00800	BH01610	BH01610	224084..224566(+)	NC_005956_01720	ORF_224084..224566_160aa_+2	n to n	BHPROD|MQB277_245086_245568_+1_ATG_160	160	Cytoplasmic	0		CYT	G3DSA:3.40.1280.10	-	PF02590;Predicted SPOUT methyltransferase	PIRSF004505	-	-	-	-	-	SSF75217	-	-	Specifically methylates the pseudouridine at position 1915 (m3Psi1915) in 23S rRNA (By similarity)	aproNOG	S	1	19	175	1.12032	0.228691	247.608	326.277	531.681	0.032017	0.266447	9.96362	0.00175117
BH_RS00805|rso|ens|geno|chemg|prod|NC_005956_224663_225943_+2_ATG_426	NC_005956	224663	225943	+2	ATG	1278	0	BH_RS00805	BH01620	BH01620	224663..225943(+)	NC_005956_01730	ORF_224663..225943_426aa_+2	n to n	BHPROD|MQB277_245665_246945_+1_ATG_426	426	Cytoplasmic	0	yes	SpI	G3DSA:2.70.70.10	PTHR21666:SF189,PTHR21666	PF01551;Peptidase family M23	-	-	-	-	-	-	SSF51261	-	TMhelix;Region of a membrane-bound protein predicted to be embedded in the membrane.	peptidase	aproNOG	D	1	24	102	-0.16595	0.910414	280.499	236.582	641.61	9.92483	0	4.94412	0.0199943	TM exclusive
BH_RS00810|rso|ens|geno|+8aa_chemg|prod|NC_005956_225933_227243_+3_ATG_436	NC_005956	225933	227243	+3	ATG	1308	0	BH_RS00810	BH01630	BH01630	225909..227243(+)	NC_005956_01740	ORF_225933..227243_436aa_+3	n to n		436	CytoplasmicMembrane	0	yes	SpI	G3DSA:3.90.226.10,G3DSA:3.30.750.44,G3DSA:2.30.42.10	PTHR32060	PF13180;PDZ domain,PF03572;Peptidase family S41	-	-	-	PS51257;Prokaryotic membrane lipoprotein lipid attachment site profile.,PS50106;PDZ domain profile.	-	SM00245;tail specific protease,SM00228;Domain present in PSD-95, Dlg, and ZO-1/2.	SSF50156,SSF52096	TIGR00225;prc: C-terminal processing peptidase	TMhelix;Region of a membrane-bound protein predicted to be embedded in the membrane.	protease	aproNOG	M	1	86	1494	-0.47755	0.334945	1906.64	3262.76	3658.59	0	0.000331747	10	7.54952e-14
BH_RS00815|rso|ens|geno|chemg|prod|NC_005956_227284_227805_+1_ATG_173	NC_005956	227284	227805	+1	ATG	519	0	BH_RS00815	BH01640	BH01640	227284..227805(+)	NC_005956_01750	ORF_227284..227805_173aa_+1	n to n	BHPROD|MQB277_248286_248807_+3_ATG_173	173	Cytoplasmic	0		CYT	G3DSA:3.90.79.10	PTHR11839,PTHR11839:SF1	PF00293;NUDIX domain	-	PR00502;NUDIX hydrolase family signature	PS00893;Nudix box signature.	PS51462;Nudix hydrolase domain profile.	-	-	SSF55811	-	-	Accelerates the degradation of transcripts by removing pyrophosphate from the 5'-end of triphosphorylated RNA, leading to a more labile monophosphorylated state that can stimulate subsequent ribonuclease cleavage (By similarity)	aproNOG	J	1	11	45	1.05128	0.573438	1176.43	1897.23	2412.79	1.77636e-15	9.99999	4.5032	0.130558	Cyt predominant
BH_RS00820|rso|ens|geno|+4aa_chemg|prod|NC_005956_227945_228505_+2_ATG_186	NC_005956	227945	228505	+2	ATG	558	0	BH_RS00820	BH01650	BH01650	227933..228505(+)	NC_005956_01760	ORF_227945..228505_186aa_+2	n to n	BHPROD|MQB277_248947_249507_+1_ATG_186	186	CytoplasmicMembrane	0	yes	SpI	-	-	PF06776;Invasion associated locus B (IalB) protein	-	-	-	-	SignalP-noTM	-	-	-	-	invasion associated locus B	aproNOG	S	1	73	1445	-0.0400153	0.939261	2358.99	2919.07	5305.87	0	10	9.88616	0.0652212	Cyt predominant
BHGENO0200|NC_005956_228761_228561_-3_GTG_66	NC_005956	228561	228761	-3	GTG	198	1			BARHE0200			ORF_228561..228731_56aa_-3			66	Unknown	0		CYT	-	-	-	-	-	-	-	-	-	-	-	-				0	0	0	NA	NA	339.933	343.38	797.148
BH_RS00825|rso|ens|geno|prod|NC_005956_228835_229122_+1_ATG_95	NC_005956	228835	229122	+1	ATG	285	0	BH_RS00825	BH01660	BH01660		NC_005956_01770	ORF_228835..229122_95aa_+1	n to n	BHPROD|MQB277_249837_250124_+3_ATG_95	95	CytoplasmicMembrane	2		TMH	-	-	PF02325;YGGT family	-	-	-	-	-	-	-	-	TMhelix;Region of a membrane-bound protein predicted to be embedded in the membrane.	YGGT family	aproNOG	S	1	1	36	-0.185759	0.962324	270.355	146.48	664.041	9.92483	0	1.38503	2.75259	TM exclusive
BH_RS00830|rso|ens|geno|chemg|prod|NC_005956_229153_229488_+1_ATG_111	NC_005956	229153	229488	+1	ATG	333	1	BH_RS00830	BH01670	BH01670	229153..229488(+)	NC_005956_01780	ORF_229153..229488_111aa_+1	n to n	BHPROD|MQB277_250155_250490_+3_ATG_111	111	Unknown	0		CYT	G3DSA:3.30.1200.10	-	PF02594;Uncharacterised ACR, YggU family COG1872	-	-	-	-	-	-	SSF69786	-	-	DUF167	aproNOG	S	1	6	14	0.0512805	1	134.014	111.7	265.539	2.5	0	4.95156	0	IM exclusive
BHCHEMG|NC_005956_229689_229838_+3_TTG_49	NC_005956	229689	229838	+3	TTG	147	1		BH01680(p)	BH01680(p)	229689..229838(+)		ORF_229716..229838_40aa_+3	p to 0		49	Unknown	0		CYT	-	-	-	-	-	-	-	-	-	-	-	-				0	0	0	NA	NA	104.91	128.622	230.241
BH_RS00835|rso|ens|geno|chemg|prod|NC_005956_230482_229952_-1_ATG_176	NC_005956	229952	230482	-1	ATG	528	0	BH_RS00835	BH01690	BH01690	229952..230482(-)	NC_005956_01790	ORF_229952..230482_176aa_-1	n to n	BHPROD|MQB277_251484_250954_-1_ATG_176	176	Cytoplasmic	0		CYT	G3DSA:3.90.80.10	PTHR10286,PTHR10286:SF0	PF00719;Inorganic pyrophosphatase	-	-	PS00387;Inorganic pyrophosphatase signature.	-	-	-	SSF50324	-	-	pyrophosphate phospho-hydrolase	aproNOG	C	1	40	472	0.515228	0.425808	1689.3	1292.41	4565.8	0	10	8.85616	2.43952e-08	Cyt predominant
BH_RS00840|rso|ens|geno|chemg|prod|NC_005956_232375_230549_-1_ATG_608	NC_005956	230549	232375	-1	ATG	1824	0	BH_RS00840	BH01700	BH01700	230549..232375(-)	NC_005956_01800	ORF_230549..232375_608aa_-1	n to n	BHPROD|MQB277_253377_251551_-1_ATG_608	608	CytoplasmicMembrane	0		CYT	G3DSA:3.30.70.870,G3DSA:3.30.70.240,G3DSA:2.40.50.250,G3DSA:2.40.30.10,G3DSA:3.40.50.300	PTHR23115:SF14,PTHR23115	PF00679;Elongation factor G C-terminus,PF00009;Elongation factor Tu GTP binding domain,PF03144;Elongation factor Tu domain 2	-	PR00315;GTP-binding elongation factor signature	PS00301;Translational (tr)-type guanine nucleotide-binding (G) domain signature.	PS51722;Translational (tr)-type guanine nucleotide-binding (G) domain profile.	-	SM00838;Elongation factor G C-terminus	SSF50447,SSF52540,SSF54980	TIGR01394;TypA_BipA: GTP-binding protein TypA/BipA,TIGR00231;small_GTP: small GTP-binding protein domain	-	gtp-binding protein typa	aproNOG	T	1	66	941	1.11804	0.0369828	1641.68	1165.96	5171.51	0	10	9.99982	6.9238e-05	Cyt predominant
BHGENO0206|NC_005956_233080_232940_-1_TTG_46	NC_005956	232940	233080	-1	TTG	138	1			BARHE0206			ORF_232940..233065_41aa_-1			46	CytoplasmicMembrane	1		TMH	-	-	-	-	-	-	-	-	-	-	-	TMhelix;Region of a membrane-bound protein predicted to be embedded in the membrane.				0	0	0	NA	NA	23.1766	27.3825	50.9618
BHGENO0205|NC_005956_232905_233036_+3_ATG_43	NC_005956	232905	233036	+3	ATG	129	1			BARHE0205			ORF_232905..233036_43aa_+3			43	Unknown	0		CYT	-	-	-	-	-	-	-	-	-	-	-	-				0	0	0	NA	NA	0.32184	0	0.27948
BH_RS00845|rso|ens|geno|chemg|prod|NC_005956_235192_233816_-1_ATG_458	NC_005956	233816	235192	-1	ATG	1374	0	BH_RS00845	BH01710	BH01710	233816..235192(-)	NC_005956_01810	ORF_233816..235192_458aa_-1	n to n	BHPROD|MQB277_256194_254818_-1_ATG_458	458	CytoplasmicMembrane	5		CYT	G3DSA:3.10.580.10,G3DSA:1.10.357.20,G3DSA:1.25.60.10	PTHR11911,PTHR11911:SF23	PF00571;CBS domain,PF03448;MgtE intracellular N domain,PF01769;Divalent cation transporter	-	-	-	PS51371;CBS domain profile.	-	SM00116;Domain in cystathionine beta-synthase and other proteins.,SM00924;MgtE intracellular N domain	SSF158791,SSF161093,SSF54631	TIGR00400;mgtE: magnesium transporter	TMhelix;Region of a membrane-bound protein predicted to be embedded in the membrane.	magnesium transporter	aproNOG	P	1	20	175	-0.697658	0.476336	166.032	194.773	341.177	8.47071	9.15772e-06	9.78804	1.96503e-07	IM predominant
BH_RS00850|rso|ens|geno|+13aa_chemg|prod|NC_005956_235545_237569_+3_ATG_674	NC_005956	235545	237569	+3	ATG	2022	0	BH_RS00850	BH01720	BH01720	235506..237569(+)	NC_005956_01820	ORF_235545..237569_674aa_+3	n to n	BHPROD|MQB277_256547_258571_+2_ATG_674	674	Cytoplasmic	0		CYT	G3DSA:3.40.390.10,G3DSA:1.20.1050.40,G3DSA:1.10.1370.10	PTHR11804,PTHR11804:SF32	PF01432;Peptidase family M3	-	-	-	-	-	-	SSF55486	-	-	peptidyl-dipeptidase Dcp	aproNOG	E	1	35	231	0.102162	0.913327	574.298	797.207	1231.23	0	10	5	7.65751e-07	Cyt predominant
BH_RS00855|+18aa_rso|NC_005956_238733_237726_-3_GTG_335	NC_005956	237726	238733	-3	GTG	1005	0	BH_RS00855	BH01730	BH01730		NC_005956_01830	ORF_237726..238370_214aa_-3	n to n		335	Unknown	0		CYT	G3DSA:3.40.50.1110	-	PF04311;Protein of unknown function (DUF459)	-	-	-	-	-	-	SSF52266	-	-	Protein of unknown function (DUF459)	aproNOG	S	1	2	3	NA	NA	138.778	172.246	260.56	2.5	0	2.55	0	IM exclusive
BHCHEMG|NC_005956_238360_238190_-1_GTG_56	NC_005956	238190	238360	-1	GTG	168	1				238190..238360(-)		ORF_238190..238354_54aa_-1			56	Unknown	0		CYT	-	-	-	-	-	-	-	-	-	-	-	-				0	0	0	NA	NA	0	0	0
BH_RS00860|rso|ens|geno|+8aa_chemg|prod|NC_005956_240059_238803_-3_ATG_418	NC_005956	238803	240059	-3	ATG	1254	0	BH_RS00860	BH01740	BH01740	238803..240083(-)	NC_005956_01840	ORF_238803..240059_418aa_-3	n to n	BHPROD|MQB277_261061_259805_-3_ATG_418	418	CytoplasmicMembrane	1		SpI	G3DSA:1.10.101.10,G3DSA:1.10.530.10	PTHR30163,PTHR30163:SF2	PF13406;Transglycosylase SLT domain,PF01471;Putative peptidoglycan binding domain	-	-	-	-	-	-	SSF47090,SSF53955	TIGR02283;MltB_2: lytic murein transglycosylase	TMhelix;Region of a membrane-bound protein predicted to be embedded in the membrane.	lytic murein transglycosylase	aproNOG	M	1	47	404	-0.81091	0.246901	194.427	306.472	361.889	8.95782	1.89274e-10	4.99931	4.81986	TM predominant
BH_RS00865|+2aa_rso|prod|NC_005956_240330_241223_+3_GTG_297	NC_005956	240330	241223	+3	GTG	891	0	BH_RS00865	BH01750	BH01750	240324..241223(+)	NC_005956_01850	ORF_240324..241223_299aa_+3	n to n	BHPROD|MQB277_261332_262225_+2_GTG_297	297	Cytoplasmic	0	yes	CYT	G3DSA:3.90.550.10	PTHR22572,PTHR22572:SF14	PF00483;Nucleotidyl transferase	-	-	-	-	-	-	SSF53448	TIGR01099;galU: UTP--glucose-1-phosphate uridylyltransferase	-	Nucleotidyl transferase	aproNOG	M	1	26	206	-0.955146	0.296338	1713.47	2371.84	3281.6	7.79424	1.99412e-09	9.97372	0.00461824	IM predominant
BH_RS00870|rso|ens|geno|chemg|prod|NC_005956_241257_242252_+3_ATG_331	NC_005956	241257	242252	+3	ATG	993	0	BH_RS00870	BH01760	BH01760	241257..242252(+)	NC_005956_01860	ORF_241257..242252_331aa_+3	n to n	BHPROD|MQB277_262259_263254_+2_ATG_331	331	Unknown	0		CYT	G3DSA:3.40.50.10490,G3DSA:3.10.580.10	PTHR11911,PTHR11911:SF72	PF00571;CBS domain,PF01380;SIS domain	PIRSF004692	-	-	PS51371;CBS domain profile.,PS51464;SIS domain profile.	-	SM00116;Domain in cystathionine beta-synthase and other proteins.	SSF53697	TIGR00393;kpsF: sugar isomerase, KpsF/GutQ family	-	KpsF GutQ family protein	aproNOG	M	1	14	134	0.293851	0.792336	81.5254	102.717	160.769	9.87445	1.12461e-11	9.93998	9.28106e-06	IM predominant
BH_RS00875|rso|ens|geno|prod|NC_005956_242798_242439_-3_ATG_119	NC_005956	242439	242798	-3	ATG	357	0	BH_RS00875	BH01770	BH01770		NC_005956_01870	ORF_242439..242798_119aa_-3	n to n	BHPROD|MQB277_263800_263441_-3_ATG_119	119	OuterMembrane	0	yes	SpII	-	-	-	-	-	-	PS51257;Prokaryotic membrane lipoprotein lipid attachment site profile.	SignalP-noTM	-	-	-	TMhelix;Region of a membrane-bound protein predicted to be embedded in the membrane.	Outer membrane lipoprotein	aproNOG	M	1	17	221	-1.05834	0.234435	74.7622	80.8163	160.081	10	0	9.90169	0.0242077	TM exclusive
BHCHEMG|NC_005956_243602_243462_-3_ATG_46	NC_005956	243462	243602	-3	ATG	138	1				243462..243602(-)		ORF_243462..243602_46aa_-3			46	Unknown	0		CYT	-	-	-	-	-	-	-	-	-	-	-	-				0	0	0	NA	NA	0	0	0
BHCHEMG|NC_005956_244136_243927_-3_CTG_69	NC_005956	243927	244136	-3	CTG	207	1				243927..244136(-)		ORF_243927..244007_26aa_-3			69	Unknown	0		CYT	-	-	-	-	-	-	-	-	-	-	-	-				0	0	0	NA	NA	0	0	0
BH_RS00880|rso|ens|geno|+48aa_chemg|NC_005956_243052_244437_+1_ATG_461	NC_005956	243052	244437	+1	ATG	1383	0	BH_RS00880	BH01780	BH01780	242908..244437(+)	NC_005956_01880	ORF_242908..244437_509aa_+1	n to n		461	Cytoplasmic	0		CYT	G3DSA:3.40.50.300,G3DSA:1.10.10.60,G3DSA:1.10.8.60,G3DSA:3.40.50.2300	PTHR32071:SF16,PTHR32071	PF02954;Bacterial regulatory protein, Fis family,PF00072;Response regulator receiver domain,PF14532;Sigma-54 interaction domain	-	-	-	PS50045;Sigma-54 interaction domain profile.,PS50110;Response regulatory domain profile.	-	SM00448;cheY-homologous receiver domain	SSF46689,SSF52172,SSF52540	-	-	two component, sigma54 specific, transcriptional regulator, Fis family	aproNOG	T	1	26	134	1.69898	0.10467	1351.61	1711.15	2769.31	9.99953	1.59872e-14	5	1.91728e-08	TM predominant
BHPROD|NC_005956_244497_244601_+3_ATG_34	NC_005956	244497	244601	+3	ATG	102	1					NC_005956_01890	ORF_244497..244601_34aa_+3		BHPROD|MQB277_265499_265603_+2_ATG_34	34	Unknown	0		CYT	-	-	-	-	-	-	-	-	-	-	-	-				0	0	0	NA	NA	331.998	690.495	474.553
BHCHEMG|NC_005956_246231_246049_-2_ATG_60	NC_005956	246049	246231	-2	ATG	180	1				246049..246231(-)		ORF_246049..246231_60aa_-2			60	Unknown	0		CYT	-	-	-	-	-	-	-	-	-	-	-	-				0	0	0	NA	NA	0	0	0
BH_RS00885|rso|ens|geno|chemg|-18aa_prod|NC_005956_244865_246436_+2_TTG_523	NC_005956	244865	246436	+2	TTG	1569	1	BH_RS00885	BH01790	BH01790	244865..246436(+)	NC_005956_01900	ORF_244919..246436_505aa_+2	n to n	BHPROD|MQB277_265921_267438_+1_ATG_505	523	CytoplasmicMembrane	1		CYT	G3DSA:3.30.870.10	PTHR21248:SF5,PTHR21248	PF13091;PLD-like domain	-	-	-	PS50035;Phospholipase D phosphodiesterase active site profile.	-	SM00155;Phospholipase D. Active site motifs.	SSF56024	-	TMhelix;Region of a membrane-bound protein predicted to be embedded in the membrane.	phospholipase d	aproNOG	I	1	21	96	0.103748	0.951271	100.922	118.907	236.76	9.99856	9.09495e-12	4.99981	3.69868e-05	TM predominant
BHCHEMG|NC_005956_247543_247379_-1_ATG_54	NC_005956	247379	247543	-1	ATG	162	0				247379..247543(-)		ORF_247379..247579_66aa_-1			54	Unknown	0		CYT	-	-	-	-	-	-	-	-	-	-	-	-				0	0	0	NA	NA	0	0	0
BH_RS00890|rso|ens|geno|+2aa_chemg|prod|NC_005956_246588_248087_+3_ATG_499	NC_005956	246588	248087	+3	ATG	1497	0	BH_RS00890	BH01800	BH01800	246582..248087(+)	NC_005956_01910	ORF_246588..248087_499aa_+3	n to n	BHPROD|MQB277_267590_269089_+2_ATG_499	499	Cytoplasmic	0		CYT	G3DSA:3.20.20.70	PTHR11911	PF00478;IMP dehydrogenase / GMP reductase domain,PF00571;CBS domain	PIRSF000130	-	PS00487;IMP dehydrogenase / GMP reductase signature.	PS51371;CBS domain profile.	-	SM00116;Domain in cystathionine beta-synthase and other proteins.	SSF54631,SSF51412	TIGR01302;IMP_dehydrog: inosine-5'-monophosphate dehydrogenase	-	Catalyzes the conversion of inosine 5'-phosphate (IMP) to xanthosine 5'-phosphate (XMP), the first committed and rate- limiting step in the de novo synthesis of guanine nucleotides, and therefore plays an important role in the regulation of cell growth (By similarity)	aproNOG	F	1	95	2166	-0.167101	0.721552	177.524	195.641	415.387	0	10	9.99989	5.21608e-05	Cyt predominant
BHPROD|NC_005956_248087_248176_+2_ATG_29	NC_005956	248087	248176	+2	ATG	87	1					NC_005956_01920	ORF_248087..248176_29aa_+2		BHPROD|MQB277_269089_269178_+1_ATG_29	29	Unknown	0		CYT	-	-	-	-	-	-	-	-	-	-	-	-				0	0	0	NA	NA	12.9594	7.57653	21.8878
BHPROD|NC_005956_248423_248274_-3_ATG_49	NC_005956	248274	248423	-3	ATG	147	1					NC_005956_01930	ORF_248274..248423_49aa_-3		BHPROD|MQB277_269425_269276_-3_ATG_49	49	Unknown	0		CYT	-	-	-	-	-	-	-	-	-	-	-	-				1	9	143	1.54267	0.128864	95.316	43.3711	148.533	0	9.98406	0.00150778	9.81412	Cyt predominant
BH_RS00895|rso|ens|geno|chemg|prod|NC_005956_248946_250232_+3_ATG_428	NC_005956	248946	250232	+3	ATG	1284	0	BH_RS00895	BH01810	BH01810	248946..250232(+)	NC_005956_01940	ORF_248946..250232_428aa_+3	n to n	BHPROD|MQB277_269948_271234_+2_ATG_428	428	Cytoplasmic	0		CYT	G3DSA:3.40.50.150,G3DSA:3.30.70.1170	PTHR22807	PF01189;NOL1/NOP2/sun family	-	PR02008;RNA (C5-cytosine) methyltransferase signature	-	PS51686;SAM-dependent MTase RsmB/NOP-type domain profile.	-	-	SSF53335	-	-	Fmu (Sun) domain protein	aproNOG	J	1	34	219	-0.359184	0.688155	391.607	585.365	792.067	6.70965	1.20882e-06	4.9837	0.00866298	TM predominant
BH_RS00900|rso|ens|geno|+17aa_chemg|NC_005956_250364_251920_+2_ATG_518	NC_005956	250364	251920	+2	ATG	1554	0	BH_RS00900	BH01820	BH01820	250313..251920(+)	NC_005956_01950	ORF_250364..251920_518aa_+2	n to n	BHPROD|MQB277_271315_272922_+1_TTG_535	518	Cytoplasmic	0		CYT	G3DSA:3.40.50.880,G3DSA:3.30.300.10,G3DSA:3.40.50.620	PTHR11922,PTHR11922:SF2	PF00958;GMP synthase C terminal domain,PF02540;NAD synthase,PF00117;Glutamine amidotransferase class-I	-	PR00096;Glutamine amidotransferase superfamily signature	-	PS51553;GMP synthetase ATP pyrophosphatase (GMPS ATP-PPase) domain profile.,PS51273;Glutamine amidotransferase type 1 domain profile.	-	-	SSF52317,SSF54810,SSF52402	TIGR00884;guaA_Cterm: GMP synthase (glutamine-hydrolyzing), C-terminal domain,TIGR00888;guaA_Nterm: GMP synthase (glutamine-hydrolyzing), N-terminal domain	-	Catalyzes the synthesis of GMP from XMP (By similarity)	aproNOG	F	1	41	350	0.268152	0.71289	911.631	956.286	2003.28	0	8.56951	9.9798	0.00134811	Cyt predominant
BH_RS00905|+14aa_rso|+19aa_chemg|prod|NC_005956_252103_252825_+1_ATG_240	NC_005956	252103	252825	+1	ATG	720	0	BH_RS00905	BH01830	BH01830	252046..252825(+)	NC_005956_01960	ORF_252046..252825_259aa_+1	n to n	BHPROD|MQB277_273105_273827_+3_ATG_240	240	Cytoplasmic	0		CYT	G3DSA:3.20.20.190	PTHR23344:SF10,PTHR23344	PF03009;Glycerophosphoryl diester phosphodiesterase family	-	-	-	PS51704;GP-PDE domain profile.	-	-	SSF51695	-	-	glycerophosphoryl diester phosphodiesterase	aproNOG	C	1	22	245	-0.118644	0.897152	433.151	418.482	959.216	0.543235	1.47745e-05	9.49961	0.0920709
BH_RS00910|rso|ens|geno|chemg|prod|NC_005956_253990_252944_-1_GTG_348	NC_005956	252944	253990	-1	GTG	1044	0	BH_RS00910	BH01840	BH01840	252944..253990(-)	NC_005956_01970	ORF_252944..253753_269aa_-1	n to n	BHPROD|MQB277_274992_273946_-1_GTG_348	348	CytoplasmicMembrane	0		CYT	G3DSA:3.40.50.300	PTHR24220:SF389,PTHR24220	PF00005;ABC transporter	-	-	PS00211;ABC transporters family signature.	PS51315;sn-glycerol-3-phosphate import ATP-binding protein ugpC family profile.,PS50893;ATP-binding cassette, ABC transporter-type domain profile.	-	SM00382;ATPases associated with a variety of cellular activities	SSF52540,SSF50331	-	-	ABC transporter	aproNOG	E	1	45	692	-0.493215	0.402376	1366.33	792.221	3325.2	10	0	10	3.60281e-10	IM predominant
BH_RS00915|rso|ens|geno|+11aa_chemg|prod|NC_005956_254844_253993_-2_ATG_283	NC_005956	253993	254844	-2	ATG	849	1	BH_RS00915	BH01850	BH01850	253993..254877(-)	NC_005956_01980	ORF_253993..254844_283aa_-2	n to n	BHPROD|MQB277_275846_274995_-2_ATG_283	283	CytoplasmicMembrane	6		TMH	G3DSA:1.10.3720.10	PTHR32243,PTHR32243:SF18	PF00528;Binding-protein-dependent transport system inner membrane component	-	-	-	PS50928;ABC transporter integral membrane type-1 domain profile.	-	-	SSF161098	-	TMhelix;Region of a membrane-bound protein predicted to be embedded in the membrane.	Sn-glycerol-3-phosphate transport system permease protein	aproNOG	P	1	5	28	-0.381679	0.911519	351.952	260.767	880.144	9.24915	0	4.99601	0	IM exclusive
BH_RS00920|rso|ens|geno|chemg|prod|NC_005956_255739_254855_-1_ATG_294	NC_005956	254855	255739	-1	ATG	882	0	BH_RS00920	BH01860	BH01860	254855..255739(-)	NC_005956_01990	ORF_254855..255739_294aa_-1	n to n	BHPROD|MQB277_276741_275857_-1_ATG_294	294	CytoplasmicMembrane	6		TMH	G3DSA:1.10.3720.10	PTHR32243,PTHR32243:SF19	PF00528;Binding-protein-dependent transport system inner membrane component	-	-	-	PS50928;ABC transporter integral membrane type-1 domain profile.	-	-	SSF161098	-	TMhelix;Region of a membrane-bound protein predicted to be embedded in the membrane.	sn-glycerol-3-phosphate transport system, permease protein	aproNOG	P	1	5	27	-0.299217	0.94109	281.094	254.966	646.774	9.57765	0	4.99186	0	IM exclusive
BHCHEMG|NC_005956_254997_255197_+3_GTG_66	NC_005956	254997	255197	+3	GTG	198	1				254997..255197(+)		ORF_255030..255197_55aa_+3			66	Unknown	0		CYT	-	-	-	-	-	-	-	-	-	-	-	-				0	0	0	NA	NA	0	0	0
BH_RS00925|rso|ens|geno|chemg|prod|NC_005956_257172_255847_-2_ATG_441	NC_005956	255847	257172	-2	ATG	1323	1	BH_RS00925	BH01870	BH01870	255847..257172(-)	NC_005956_02000	ORF_255847..257172_441aa_-2	n to n	BHPROD|MQB277_278174_276849_-2_ATG_441	441	Periplasmic	0	yes	SpI	G3DSA:3.40.190.10	PTHR30061,PTHR30061:SF7	PF13416;Bacterial extracellular solute-binding protein	-	-	-	-	SignalP-noTM	-	SSF53850	-	-	extracellular solute-binding protein, family 1	aproNOG	P	1	73	1046	-0.178669	0.738316	243.195	289.992	681.698	0	10	9.98342	0.00168637	Cyt predominant
BHGENO0224|NC_005956_257190_257354_+3_GTG_54	NC_005956	257190	257354	+3	GTG	162	1			BARHE0224			ORF_257193..257354_53aa_+3			54	Unknown	0		CYT	-	-	-	-	-	-	-	-	-	-	-	-				0	0	0	NA	NA	101.386	73.1873	233.01
BHRSO01880_p|ens_p|geno_p|NC_005956_257852_257571_-3_GAT_94	NC_005956	257571	257852	-3	GAT	279	6		BH01880(p)	BH01880(p)				p to 0		94	Unknown	0		CYT	-	-	-	-	-	-	-	-	-	-	-	-				0	0	0	NA	NA	25.5027	17.1282	54.7621
BHGENO0225|NC_005956_258088_257969_-1_ATG_39	NC_005956	257969	258088	-1	ATG	117	1			BARHE0225			ORF_257969..258088_39aa_-1			39	Unknown	0		CYT	-	-	-	-	-	-	-	-	-	-	-	-				0	0	0	NA	NA	5.35201	9.19189	10.4312
BH_RS00930|rso|ens|geno|chemg|prod|NC_005956_259479_258559_-2_GTG_306	NC_005956	258559	259479	-2	GTG	918	0	BH_RS00930	BH01890	BH01890	258559..259479(-)	NC_005956_02010	ORF_258559..259323_254aa_-2	n to n	BHPROD|MQB277_280481_279561_-2_GTG_306	306	Unknown	0	yes	SpI	G3DSA:3.40.50.1980	PTHR30477:SF5,PTHR30477	PF01297;Periplasmic solute binding protein family	-	PR00690;Adhesin family signature,PR00691;Adhesin B signature	-	-	-	-	SSF53807	-	TMhelix;Region of a membrane-bound protein predicted to be embedded in the membrane.	periplasmic solute binding protein	aproNOG	P	1	2	10	2.46632	0.637711	62.2651	62.5643	155.366	0.0390625	6.875	0.45	2.45	Cyt predominant
BHCHEMG|NC_005956_258638_258856_+2_TTG_72	NC_005956	258638	258856	+2	TTG	216	1				258638..258856(+)		ORF_258707..258856_49aa_+2			72	Unknown	1		CYT	-	-	-	-	-	-	-	-	-	-	-	TMhelix;Region of a membrane-bound protein predicted to be embedded in the membrane.				0	0	0	NA	NA	0	0	0
BH_RS00935|rso|ens|geno|chemg|prod|NC_005956_260362_259481_-1_GTG_293	NC_005956	259481	260362	-1	GTG	879	0	BH_RS00935	BH01900	BH01900	259481..260362(-)	NC_005956_02020	ORF_259481..260320_279aa_-1	n to n	BHPROD|MQB277_281364_280483_-1_GTG_293	293	CytoplasmicMembrane	8		TMH	-	PTHR30477,PTHR30477:SF0	PF00950;ABC 3 transport family	-	-	-	-	-	-	SSF81345	-	TMhelix;Region of a membrane-bound protein predicted to be embedded in the membrane.	ABC transporter	aproNOG	P	0	0	0	NA	NA	1262.68	1680.98	2515.28
BH_RS00940|rso|ens|geno|chemg|prod|NC_005956_261118_260366_-1_ATG_250	NC_005956	260366	261118	-1	ATG	750	0	BH_RS00940	BH01910	BH01910	260366..261118(-)	NC_005956_02030	ORF_260366..261118_250aa_-1	n to n	BHPROD|MQB277_282120_281368_-1_ATG_250	250	Unknown	0		CYT	G3DSA:3.40.50.300	PTHR24220:SF218,PTHR24220	PF00005;ABC transporter	-	-	PS00211;ABC transporters family signature.	PS50893;ATP-binding cassette, ABC transporter-type domain profile.	-	SM00382;ATPases associated with a variety of cellular activities	SSF52540	-	-	ABC transporter	aproNOG	P	1	4	8	NA	NA	302.516	347.764	654.256	0	0	4.71176	0	IM exclusive
BH_RS00945|rso|ens|geno|+5aa_chemg|prod|NC_005956_261827_262051_+2_ATG_74	NC_005956	261827	262051	+2	ATG	222	0	BH_RS00945	BH01920	BH01920	261812..262051(+)	NC_005956_02040	ORF_261827..262051_74aa_+2	n to n	BHPROD|MQB277_282829_283053_+1_ATG_74	74	Unknown	0		CYT	G3DSA:3.40.30.10	-	PF00462;Glutaredoxin	-	-	-	PS51354;Glutaredoxin domain profile.	-	-	SSF52833	TIGR02194;GlrX_NrdH: glutaredoxin-like protein NrdH	-	glutaredoxin-like protein nrdH	aproNOG	O	1	10	119	0.00164974	1	382.164	740.128	787.556	0	10	7.05455	0	Cyt predominant
BH_RS00950|rso|ens|geno|+3aa_chemg|prod|NC_005956_262051_262449_+1_ATG_132	NC_005956	262051	262449	+1	ATG	396	0	BH_RS00950	BH01930	BH01930	262042..262449(+)	NC_005956_02050	ORF_262051..262449_132aa_+1	n to n	BHPROD|MQB277_283053_283451_+3_ATG_132	132	Cytoplasmic	0		CYT	G3DSA:3.40.50.360	-	PF07972;NrdI Flavodoxin like	PIRSF005087	-	-	-	-	-	SSF52218	TIGR00333;nrdI: nrdI protein	-	Probably involved in ribonucleotide reductase function (By similarity)	aproNOG	F	1	14	85	-1.75607	0.222789	1201.27	2319.78	2169.39	9.99962	2.84217e-13	8.99919	0.0209357	IM predominant
BHCHEMG|NC_005956_263806_263651_-1_ATG_51	NC_005956	263651	263806	-1	ATG	153	1				263651..263806(-)		ORF_263651..263806_51aa_-1			51	CytoplasmicMembrane	0		CYT	-	-	-	-	-	-	-	-	-	-	-	-				0	0	0	NA	NA	0	0	0
BH_RS00955|rso|ens|geno|+9aa_chemg|NC_005956_262431_264581_+3_TTG_716	NC_005956	262431	264581	+3	TTG	2148	0	BH_RS00955	BH01940	BH01940	262404..264581(+)	NC_005956_02060	ORF_262500..264581_693aa_+3	n to n		716	Cytoplasmic	0		CYT	G3DSA:3.20.70.20	PTHR11573:SF4,PTHR11573	PF02867;Ribonucleotide reductase, barrel domain,PF00317;Ribonucleotide reductase, all-alpha domain,PF08343;Ribonucleotide reductase N-terminal	-	PR01183;Ribonucleotide reductase large chain signature	PS00089;Ribonucleotide reductase large subunit signature.	-	-	-	SSF48168,SSF51998	TIGR04170;RNR_1b_NrdE: ribonucleoside-diphosphate reductase, class 1b, alpha subunit,TIGR02506;NrdE_NrdA: ribonucleoside-diphosphate reductase, alpha subunit	-	Provides the precursors necessary for DNA synthesis. Catalyzes the biosynthesis of deoxyribonucleotides from the corresponding ribonucleotides (By similarity)	aproNOG	F	1	66	1167	-0.107321	0.83878	4096.65	5276.73	9578.18	0	10	9.25852	0.344643	Cyt predominant
BH_RS00965|rso|ens|geno|chemg|prod|NC_005956_266430_265564_-2_ATG_288	NC_005956	265564	266430	-2	ATG	864	0	BH_RS00965	BH01960	BH01960	265564..266430(-)	NC_005956_02080	ORF_265564..266430_288aa_-2	n to n	BHPROD|MQB277_287432_286566_-2_ATG_288	288	Cytoplasmic	0		CYT	G3DSA:3.40.50.150,G3DSA:1.10.8.10	PTHR18895,PTHR18895:SF7	PF05175;Methyltransferase small domain	-	-	PS00092;N-6 Adenine-specific DNA methylases signature.	-	-	-	SSF53335	TIGR00536;hemK_fam: methyltransferase, HemK family,TIGR03534;RF_mod_PrmC: protein-(glutamine-N5) methyltransferase, release factor-specific	-	Methylates the class 1 translation termination release factors RF1 PrfA and RF2 PrfB on the glutamine residue of the universally conserved GGQ motif (By similarity)	aproNOG	J	1	6	18	-0.533682	0.911888	160.702	149.802	388.252	8.73295	0.0012207	4.15965	0	IM exclusive
BH_RS00960|rso|ens|geno|chemg|prod|NC_005956_264593_265567_+2_ATG_324	NC_005956	264593	265567	+2	ATG	972	0	BH_RS00960	BH01950	BH01950	264593..265567(+)	NC_005956_02070	ORF_264593..265567_324aa_+2	n to n	BHPROD|MQB277_285595_286569_+1_ATG_324	324	Cytoplasmic	0		CYT	G3DSA:1.10.620.20	PTHR23409	PF00268;Ribonucleotide reductase, small chain	PIRSF000355	-	PS00368;Ribonucleotide reductase small subunit signature.	-	-	-	SSF47240	TIGR04171;RNR_1b_NrdF: ribonucleoside-diphosphate reductase, class 1b, beta subunit	-	Provides the precursors necessary for DNA synthesis. Catalyzes the biosynthesis of deoxyribonucleotides from the corresponding ribonucleotides (By similarity)	aproNOG	F	1	35	334	-0.801615	0.285139	3086.07	3029.46	8272.95	0	9.988	9.39207	1.39485e-05	Cyt predominant
BH_RS00970|rso|ens|geno|chemg|prod|NC_005956_267506_266427_-3_ATG_359	NC_005956	266427	267506	-3	ATG	1077	0	BH_RS00970	BH01970	BH01970	266427..267506(-)	NC_005956_02090	ORF_266427..267506_359aa_-3	n to n	BHPROD|MQB277_288508_287429_-3_ATG_359	359	Cytoplasmic	0		CYT	G3DSA:3.30.160.20,G3DSA:1.20.58.410	PTHR11075:SF9,PTHR11075	PF00472;RF-1 domain,PF03462;PCRF domain	-	-	PS00745;Prokaryotic-type class I peptide chain release factors signature.	-	-	SM00937;Target=BH_RS00970|rso|ens|geno|chemg|prod|NC_005956_267506_266427_-3_ATG_359 64 179	SSF75620	TIGR00019;prfA: peptide chain release factor 1	-	Peptide chain release factor 1 directs the termination of translation in response to the peptide chain termination codons UAG and UAA (By similarity)	aproNOG	J	1	36	316	0.964276	0.190428	22.2131	16.94	49.2665	0.000179697	0.0101618	9.82832	6.56823e-08
BHCHEMG|NC_005956_267274_266510_-1_TTG_254	NC_005956	266510	267274	-1	TTG	762	0				266510..267274(-)		ORF_266510..267184_224aa_-1			254	Unknown	1		CYT	-	-	-	-	-	-	-	-	-	-	-	-				0	0	0	NA	NA	0	0	0
BH_RS00975|rso|ens|geno|+24aa_chemg|NC_005956_268117_267701_-1_ATG_138	NC_005956	267701	268117	-1	ATG	414	0	BH_RS00975	BH01980	BH01980	267701..268189(-)	NC_005956_02100	ORF_267701..268117_138aa_-1	n to n	BHPROD|MQB277_289191_288703_-1_TTG_162	138	Cytoplasmic	0		CYT	G3DSA:1.10.10.10	-	PF01475;Ferric uptake regulator family	-	-	-	-	-	-	SSF46785	-	-	Ferric uptake	aproNOG	P	1	11	63	1.90242	0.210778	1082.3	1260.73	1992.97	7.97402	0.000297381	4.99863	0	IM exclusive
BH_RS00980|rso|ens|geno|chemg|prod|NC_005956_270852_268135_-2_ATG_905	NC_005956	268135	270852	-2	ATG	2715	0	BH_RS00980	BH01990	BH01990	268135..270852(-)	NC_005956_02110	ORF_268135..270852_905aa_-2	n to n	BHPROD|MQB277_291854_289137_-2_ATG_905	905	Cytoplasmic	0		CYT	G3DSA:3.40.50.300,G3DSA:1.10.3060.10,G3DSA:3.90.1440.10	PTHR30612	PF07516;SecA Wing and Scaffold domain,PF02810;SEC-C motif,PF07517;SecA DEAD-like domain,PF01043;SecA preprotein cross-linking domain	-	PR00906;SecA protein signature	PS01312;SecA family signature.	PS51196;SecA family profile.	-	SM00957;SecA DEAD-like domain,SM00958;SecA preprotein cross-linking domain	SSF52540,SSF81886,SSF81767	TIGR00963;secA: preprotein translocase, SecA subunit	-	Part of the Sec protein translocase complex. Interacts with the SecYEG preprotein conducting channel. Has a central role in coupling the hydrolysis of ATP to the transfer of proteins into and across the cell membrane, serving both as a receptor for the preprotein-SecB complex and as an ATP-driven molecular motor driving the stepwise translocation of polypeptide chains across the membrane (By simi…	aproNOG	U	1	150	3460	0.109253	0.804928	515.696	612.12	1297.23	10	0	10	2.26485e-13	IM predominant
BHCHEMG|NC_005956_269201_269028_-3_ATG_57	NC_005956	269028	269201	-3	ATG	171	1				269028..269201(-)		ORF_269028..269201_57aa_-3			57	CytoplasmicMembrane	0		CYT	-	-	-	-	-	-	-	-	-	-	-	-				0	0	0	NA	NA	0	0	0
BHGENO0237|NC_005956_271137_271277_+3_CTG_46	NC_005956	271137	271277	+3	CTG	138	1			BARHE0237			ORF_271209..271277_22aa_+3			46	Unknown	0		CYT	-	-	-	-	-	-	-	-	-	-	-	-				0	0	0	NA	NA	21.9053	22.5698	36.5584
BH_RS00985|rso|ens|geno|+11aa_chemg|prod|NC_005956_271267_272220_+1_ATG_317	NC_005956	271267	272220	+1	ATG	951	0	BH_RS00985	BH02000	BH02000	271234..272220(+)	NC_005956_02120	ORF_271240..272220_326aa_+1	n to n	BHPROD|MQB277_292269_293222_+3_ATG_317	317	Unknown	0	yes	SpI	G3DSA:3.10.50.40	PTHR10657	PF13616;PPIC-type PPIASE domain	-	-	-	PS50198;PpiC-type peptidyl-prolyl cis-trans isomerase family profile.	SignalP-noTM	-	SSF109998,SSF54534	-	-	Peptidyl-prolyl cis-trans isomerase	aproNOG	O	1	207	5668	-0.0586468	0.8918	26835.8	34743.9	59292.9	0	10	5	5	Cyt predominant
BHCHEMG|NC_005956_272975_272550_-3_ATG_141	NC_005956	272550	272975	-3	ATG	423	0				272550..272975(-)		ORF_272550..272975_141aa_-3			141	CytoplasmicMembrane	3		TMH	-	-	-	-	-	-	-	-	-	-	-	TMhelix;Region of a membrane-bound protein predicted to be embedded in the membrane.				0	0	0	NA	NA	0	0	0
BH_RS00990|rso|ens|geno|chemg|prod|NC_005956_272335_273567_+1_GTG_410	NC_005956	272335	273567	+1	GTG	1230	0	BH_RS00990	BH02010	BH02010	272335..273567(+)	NC_005956_02130	ORF_272716..273567_283aa_+1	n to n	BHPROD|MQB277_293337_294569_+3_GTG_410	410	Cytoplasmic	0		CYT	G3DSA:3.60.70.12	PTHR23100:SF0,PTHR23100	PF01960;ArgJ family	-	-	-	-	-	-	SSF56266	TIGR00120;ArgJ: glutamate N-acetyltransferase/amino-acid acetyltransferase	-	Catalyzes two activities which are involved in the cyclic version of arginine biosynthesis the synthesis of N- acetylglutamate from glutamate and acetyl-CoA as the acetyl donor, and of ornithine by transacetylation between N(2)-acetylornithine and glutamate (By similarity)	aproNOG	E	1	30	270	0.316571	0.693176	955.568	772.107	2930.11	0	10	9.90876	8.99233e-08	Cyt predominant
BH_RS00995|rso|ens|geno|+4aa_chemg|prod|NC_005956_273702_274115_+3_ATG_137	NC_005956	273702	274115	+3	ATG	411	0	BH_RS00995	BH02020	BH02020	273690..274115(+)	NC_005956_02140	ORF_273702..274115_137aa_+3	n to n	BHPROD|MQB277_294704_295117_+2_ATG_137	137	Unknown	0	yes	CYT	G3DSA:3.90.79.10	PTHR22769,PTHR22769:SF19	PF00293;NUDIX domain	-	PR00502;NUDIX hydrolase family signature	-	PS51462;Nudix hydrolase domain profile.	-	-	SSF55811	TIGR00586;mutt: mutator mutT protein	-	mutator MutT protein	aproNOG	L	1	8	64	1.30031	0.390111	977.102	417.758	2703	2.63341	0.0350018	9.0531	0.00195491
BH_RS01000|rso|ens|geno|chemg|prod|NC_005956_276186_275323_-2_ATG_287	NC_005956	275323	276186	-2	ATG	861	0	BH_RS01000	BH02030	BH02030	275323..276186(-)	NC_005956_02150	ORF_275323..276186_287aa_-2	n to n	BHPROD|MQB277_297188_296325_-2_ATG_287	287	Cytoplasmic	0		CYT	G3DSA:3.90.1720.10	PTHR21666:SF185,PTHR21666	PF00877;NlpC/P60 family	-	-	-	-	-	-	SSF54001	-	-	nlp p60 protein	aproNOG	M	1	12	44	2.63624	0.159873	401.066	434.893	891.505	9.85135	2.38419e-06	7.8463	0	IM exclusive
BHCHEMG|NC_005956_276416_276222_-3_ATG_64	NC_005956	276222	276416	-3	ATG	192	1				276222..276416(-)		ORF_276222..276416_64aa_-3			64	Unknown	0		CYT	-	-	-	-	-	-	-	-	-	-	-	-				0	0	0	NA	NA	15.3593	8.38095	45.8957
BH_RS01005|rso|ens|geno|chemg|prod|NC_005956_277695_276328_-2_ATG_455	NC_005956	276328	277695	-2	ATG	1365	0	BH_RS01005	BH02040	BH02040	276328..277695(-)	NC_005956_02160	ORF_276328..277695_455aa_-2	n to n	BHPROD|MQB277_298697_297330_-2_ATG_455	455	Cytoplasmic	0		CYT	G3DSA:3.40.630.10	PTHR11963,PTHR11963:SF13	PF02789;Cytosol aminopeptidase family, N-terminal domain,PF00883;Cytosol aminopeptidase family, catalytic domain	-	PR00481;Cytosol aminopeptidase signature	PS00631;Cytosol aminopeptidase signature.	-	-	-	SSF52949,SSF53187	-	-	Presumably involved in the processing and regular turnover of intracellular proteins. Catalyzes the removal of unsubstituted N-terminal amino acids from various peptides (By similarity)	aproNOG	E	1	56	839	0.614328	0.264045	891.158	1080.47	2164.78	0	10	9.99994	1.76458e-05	Cyt predominant
BHCHEMG|NC_005956_276839_277174_+2_TTG_111	NC_005956	276839	277174	+2	TTG	333	0				276839..277174(+)		ORF_276905..277174_89aa_+2			111	CytoplasmicMembrane	0		TMH	-	-	-	-	-	-	-	-	-	-	-	-				0	0	0	NA	NA	0	0	0
BHCHEMG|NC_005956_277532_277678_+2_ATG_48	NC_005956	277532	277678	+2	ATG	144	1				277532..277678(+)		ORF_277532..277678_48aa_+2			48	Unknown	0		CYT	-	-	-	-	-	-	-	-	-	-	-	-				0	0	0	NA	NA	0	0	0
BH_RS01010|rso|ens|geno|+17aa_chemg|prod|NC_005956_278713_277715_-1_ATG_332	NC_005956	277715	278713	-1	ATG	996	0	BH_RS01010	BH02050	BH02050	277715..278764(-)	NC_005956_02170	ORF_277715..278713_332aa_-1	n to n	BHPROD|MQB277_299715_298717_-1_ATG_332	332	Cytoplasmic	0		CYT	G3DSA:3.40.50.300	PTHR10285,PTHR10285:SF7	PF00485;Phosphoribulokinase / Uridine kinase family	PIRSF000545	-	-	-	-	-	SSF52540	TIGR00554;panK_bact: pantothenate kinase	-	Pantothenic acid kinase	aproNOG	H	1	13	74	0.700783	0.626561	1031.81	976.562	2498.92	9.39351	5.48363e-05	4.99997	3.25694e-06	TM predominant
BHGENO0244|NC_005956_278844_278719_-2_CTG_41	NC_005956	278719	278844	-2	CTG	123	1			BARHE0244			ORF_278719..278802_27aa_-2			41	Unknown	0		CYT	-	-	-	-	-	-	-	-	-	-	-	-				0	0	0	NA	NA	111.936	91.3846	234.367
BH_RS01015|rso|ens|geno|chemg|prod|NC_005956_279818_278829_-3_ATG_329	NC_005956	278829	279818	-3	ATG	987	0	BH_RS01015	BH02060	BH02060	278829..279818(-)	NC_005956_02180	ORF_278829..279818_329aa_-3	n to n	BHPROD|MQB277_300820_299831_-3_ATG_329	329	Periplasmic	0	yes	SpI	G3DSA:3.40.50.1170,G3DSA:3.40.50.40	PTHR11707:SF4,PTHR11707	PF00710;Asparaginase	PIRSF500176,PIRSF001220	PR00139;Asparaginase/glutaminase family signature	-	PS51732;Asparaginase / glutaminase domain profile.	-	SM00870;Target=BH_RS01015|rso|ens|geno|chemg|prod|NC_005956_279818_278829_-3_ATG_329 3 320	SSF53774	-	-	L-asparaginase	aproNOG	E	1	20	158	0.136169	0.902613	2876.28	2358.49	7463.39	0	10	5.94999	5.35035e-07	Cyt predominant
BH_RS01020|rso|ens|geno|chemg|prod|NC_005956_280022_280603_+2_ATG_193	NC_005956	280022	280603	+2	ATG	579	0	BH_RS01020	BH02070	BH02070	280022..280603(+)	NC_005956_02190	ORF_280022..280603_193aa_+2	n to n	BHPROD|MQB277_301024_301605_+1_ATG_193	193	Cytoplasmic	0		CYT	G3DSA:3.60.20.10	PTHR32194	PF00227;Proteasome subunit	PIRSF039093	-	-	PS51476;Proteasome beta-type subunit profile.	-	-	SSF56235	TIGR03692;ATP_dep_HslV: ATP-dependent protease HslVU, peptidase subunit	-	Protease subunit of a proteasome-like degradation complex believed to be a general protein degrading machinery (By similarity)	aproNOG	O	1	12	118	0.0227114	1	921.426	550.045	2371.19	8.39591e-06	5.99347	8.35872	0.0960904	Cyt predominant
BH_RS01025|rso|ens|geno|chemg|prod|NC_005956_280604_281914_+2_ATG_436	NC_005956	280604	281914	+2	ATG	1308	0	BH_RS01025	BH02080	BH02080	280604..281914(+)	NC_005956_02200	ORF_280604..281914_436aa_+2	n to n	BHPROD|MQB277_301606_302916_+1_ATG_436	436	Cytoplasmic	0		CYT	G3DSA:1.10.8.60,G3DSA:1.10.8.10,G3DSA:3.40.50.300	PTHR11262:SF3,PTHR11262	PF00004;ATPase family associated with various cellular activities (AAA),PF10431;C-terminal, D2-small domain, of ClpB protein,PF07724;AAA domain (Cdc48 subfamily)	-	-	-	-	-	SM00382;ATPases associated with a variety of cellular activities,SM01086;C-terminal, D2-small domain, of ClpB protein	SSF52540	TIGR00390;hslU: ATP-dependent protease HslVU, ATPase subunit	-	this subunit has chaperone activity. The binding of ATP and its subsequent hydrolysis by HslU are essential for unfolding of protein substrates subsequently hydrolyzed by HslV. HslU recognizes the N-terminal part of its protein substrates and unfolds these before they are guided to HslV for hydrolysis (By similarity)	aproNOG	O	1	63	814	0.423778	0.445689	3105.69	3365.33	6428.94	0	1.79909	10	2.68777e-09
BH_RS01030|+11aa_rso|prod|NC_005956_282932_281934_-3_GTG_332	NC_005956	281934	282932	-3	GTG	996	0	BH_RS01030	BH02090	BH02090	281934..282965(-)	NC_005956_02210	ORF_281934..282599_221aa_-3	n to n	BHPROD|MQB277_303934_302936_-3_GTG_332	332	Cytoplasmic	0		CYT	G3DSA:3.40.50.150	PTHR18895,PTHR18895:SF64	PF05175;Methyltransferase small domain	-	-	PS00092;N-6 Adenine-specific DNA methylases signature.	-	-	-	SSF53335	-	-	Methyltransferase	aproNOG	J	1	5	6	NA	NA	712.998	531.716	1587.34	2.5	0	2.3589	0.84035	TM exclusive
BH_RS01035|rso|ens|geno|chemg|prod|NC_005956_285205_283004_-1_ATG_733	NC_005956	283004	285205	-1	ATG	2199	0	BH_RS01035	BH02100	BH02100	283004..285205(-)	NC_005956_02220	ORF_283004..285205_733aa_-1	n to n	BHPROD|MQB277_306207_304006_-1_ATG_733	733	Cytoplasmic	0		CYT	G3DSA:1.10.10.400,G3DSA:2.40.50.140,G3DSA:3.30.1370.10,G3DSA:3.30.230.70	PTHR11252:SF0,PTHR11252	PF03725;3' exoribonuclease family, domain 2,PF03726;Polyribonucleotide nucleotidyltransferase, RNA binding domain,PF00013;KH domain,PF01138;3' exoribonuclease family, domain 1,PF00575;S1 RNA binding domain	PIRSF005499	-	-	PS50126;S1 domain profile.,PS50084;Type-1 KH domain profile.	-	SM00322;K homology RNA-binding domain,SM00316;Ribosomal protein S1-like RNA-binding domain	SSF54211,SSF50249,SSF55666,SSF54791	TIGR03591;polynuc_phos: polyribonucleotide nucleotidyltransferase	-	Involved in mRNA degradation. Hydrolyzes single-stranded polyribonucleotides processively in the 3'- to 5'-direction (By similarity)	aproNOG	J	1	93	1580	0.3896	0.422439	706.732	536.55	2045.53	0	9.99998	9.99995	1.46128e-05	Cyt predominant
BHORF|NC_005956_283992_283795_-2_ATG_65	NC_005956	283795	283992	-2	ATG	195	1						ORF_283795..283992_65aa_-2		BHORF|MQB277_304994_304797_-2_ATG_65	65	CytoplasmicMembrane	0		TMH	-	-	-	-	-	-	-	-	-	-	-	-				0	1	2	NA	NA	0	0	0
BHCHEMG|NC_005956_284760_284888_+3_ATG_42	NC_005956	284760	284888	+3	ATG	126	0				284760..284888(+)		ORF_284760..284888_42aa_+3			42	Unknown	0		CYT	-	-	-	-	-	-	-	-	-	-	-	-				0	0	0	NA	NA	0	0	0
BH_RS01040|rso|ens|geno|chemg|prod|NC_005956_285738_285469_-2_ATG_89	NC_005956	285469	285738	-2	ATG	267	0	BH_RS01040	BH02110	BH02110	285469..285738(-)	NC_005956_02230	ORF_285469..285738_89aa_-2	n to n	BHPROD|MQB277_306740_306471_-2_ATG_89	89	Cytoplasmic	0		CYT	G3DSA:1.10.287.10	PTHR23321	PF00312;Ribosomal protein S15	-	-	PS00362;Ribosomal protein S15 signature.	-	-	-	SSF47060	TIGR00952;S15_bact: ribosomal protein uS15	-	One of the primary rRNA binding proteins, it binds directly to 16S rRNA where it helps nucleate assembly of the platform of the 30S subunit by binding and bridging several RNA helices of the 16S rRNA (By similarity)	aproNOG	J	1	47	750	-0.231792	0.688931	760.263	805.052	1219.94	0	10	9.88155	0.00126305	Cyt predominant
BHCHEMG|NC_005956_287558_287394_-3_CTG_54	NC_005956	287394	287558	-3	CTG	162	1				287394..287558(-)		ORF_287394..287510_38aa_-3			54	Unknown	0		CYT	-	-	-	-	-	-	-	-	-	-	-	-				0	0	0	NA	NA	0	0	0
BH_RS01045|rso|ens|geno|chemg|prod|NC_005956_286061_287689_+2_ATG_542	NC_005956	286061	287689	+2	ATG	1626	0	BH_RS01045	BH02120	BH02120	286061..287689(+)	NC_005956_02240	ORF_286061..287689_542aa_+2	n to n	BHPROD|MQB277_307063_308691_+1_ATG_542	542	CytoplasmicMembrane	12		TMH	G3DSA:1.20.1250.20	PTHR24003,PTHR24003:SF461	PF05977;Transmembrane secretion effector	-	-	-	PS50850;Major facilitator superfamily (MFS) profile.	-	-	SSF103473	-	TMhelix;Region of a membrane-bound protein predicted to be embedded in the membrane.	Major facilitator superfamily	aproNOG	G	1	18	172	-1.35184	0.177872	109.404	117.937	275.072	10	0	5.77579	2.17972	TM predominant
BHGENO0252|NC_005956_287992_288087_+1_GTG_31	NC_005956	287992	288087	+1	GTG	93	1			BARHE0252			ORF_288022..288087_21aa_+1			31	Unknown	0		CYT	-	-	-	-	-	-	-	-	-	-	-	-				0	0	0	NA	NA	169.255	162.83	417.451
BH_RS01050|rso|ens|geno|+5aa_chemg|prod|NC_005956_289117_288158_-1_ATG_319	NC_005956	288158	289117	-1	ATG	957	0	BH_RS01050	BH02130	BH02130	288158..289132(-)	NC_005956_02250	ORF_288158..289117_319aa_-1	n to n	BHPROD|MQB277_310119_309160_-1_ATG_319	319	Cytoplasmic	0		CYT	-	PTHR13767:SF2,PTHR13767	PF09157;Pseudouridine synthase II TruB, C-terminal,PF01509;TruB family pseudouridylate synthase (N terminal domain)	-	-	-	-	-	-	SSF55120	TIGR00431;TruB: tRNA pseudouridine(55) synthase	-	Responsible for synthesis of pseudouridine from uracil- 55 in the psi GC loop of transfer RNAs (By similarity)	aproNOG	J	1	13	46	0.214779	0.930701	34.8887	26.6679	101.675	9.49887	7.62939e-05	4.98943	0.00156165	TM predominant
BH_RS01055|rso|ens|geno|chemg|prod|NC_005956_289529_289122_-3_ATG_135	NC_005956	289122	289529	-3	ATG	405	0	BH_RS01055	BH02140	BH02140	289122..289529(-)	NC_005956_02260	ORF_289122..289529_135aa_-3	n to n	BHPROD|MQB277_310531_310124_-3_ATG_135	135	Cytoplasmic	0		CYT	G3DSA:3.30.300.20	-	PF02033;Ribosome-binding factor A	-	-	PS01319;Ribosome-binding factor A signature.	-	-	-	SSF89919	TIGR00082;rbfA: ribosome-binding factor A	-	Associates with free 30S ribosomal subunits (but not with 30S subunits that are part of 70S ribosomes or polysomes). Essential for efficient processing of 16S rRNA. May interact with the 5'-terminal helix region of 16S rRNA (By similarity)	aproNOG	J	1	16	142	0.385018	0.717231	232.292	169.535	732.016	3.79883	0.000166412	4.99999	1.70794e-06
BH_RS01060|rso|ens|geno|chemg|prod|NC_005956_292195_289658_-1_ATG_845	NC_005956	289658	292195	-1	ATG	2535	0	BH_RS01060	BH02150	BH02150	289658..292195(-)	NC_005956_02270	ORF_289658..292195_845aa_-1	n to n		845	Cytoplasmic	0		CYT	G3DSA:3.40.50.10050,G3DSA:2.40.30.10,G3DSA:3.40.50.300	PTHR23115:SF41,PTHR23115	PF03144;Elongation factor Tu domain 2,PF08364;Bacterial translation initiation factor IF-2 associated region,PF04760;Translation initiation factor IF-2, N-terminal region,PF00009;Elongation factor Tu GTP binding domain,PF11987;Translation-initiation factor 2	-	-	PS01176;Initiation factor 2 signature.	PS51722;Translational (tr)-type guanine nucleotide-binding (G) domain profile.	-	-	SSF50447,SSF52156,SSF52540	TIGR00487;IF-2: translation initiation factor IF-2,TIGR00231;small_GTP: small GTP-binding protein domain	-	One of the essential components for the initiation of protein synthesis. Protects formylmethionyl-tRNA from spontaneous hydrolysis and promotes its binding to the 30S ribosomal subunits. Also involved in the hydrolysis of GTP during the formation of the 70S ribosomal complex (By similarity)	aproNOG	J	1	165	3331	0.578117	0.191329	447.756	274.104	1783.74	0	0	10	8.8917e-07
BH_RS01065|rso|ens|geno|chemg|prod|NC_005956_292827_292192_-2_ATG_211	NC_005956	292192	292827	-2	ATG	633	0	BH_RS01065	BH02160	BH02160	292192..292827(-)	NC_005956_02280	ORF_292192..292827_211aa_-2	n to n	BHPROD|MQB277_313829_313194_-2_ATG_211	211	Unknown	0		CYT	G3DSA:3.30.1230.10,G3DSA:3.30.1330.30	-	PF04296;Protein of unknown function (DUF448)	-	-	-	-	-	-	SSF64376,SSF55315	-	-	nucleic-acid-binding protein	aproNOG	K	1	16	126	0.741952	0.49675	54.8729	37.421	146.905	9.99994	1.77636e-15	2.61618	6.71097	TM predominant
BHCHEMG|NC_005956_292514_292747_+2_TTG_77	NC_005956	292514	292747	+2	TTG	231	1				292514..292747(+)		ORF_292553..292747_64aa_+2			77	Unknown	0		CYT	-	-	-	-	-	-	-	-	-	-	-	-				0	0	0	NA	NA	0	0	0
BH_RS01070_p|rso|ens|geno|+8aa_chemg|prod|NC_005956_294440_292854_-3_ATG_528	NC_005956	292854	294440	-3	ATG	1584	0	BH_RS01070(p)	BH02170	BH02170	292854..294464(-)	NC_005956_02290	ORF_292854..294440_528aa_-3	n to p	BHPROD|MQB277_315442_313856_-3_ATG_528	528	Cytoplasmic	0		CYT	G3DSA:3.30.300.20,G3DSA:2.40.50.140,G3DSA:1.10.150.20,G3DSA:3.30.1480.10	PTHR22648:SF0,PTHR22648	PF08529;NusA N-terminal domain,PF13184;NusA-like KH domain,PF14520;Helix-hairpin-helix domain,PF00575;S1 RNA binding domain	-	-	-	PS50084;Type-1 KH domain profile.,PS50126;S1 domain profile.	-	SM00316;Ribosomal protein S1-like RNA-binding domain,SM00322;K homology RNA-binding domain	SSF54814,SSF47794,SSF69705,SSF50249	TIGR01954;nusA_Cterm_rpt: transcription termination factor NusA, C-terminal duplication,TIGR01953;NusA: transcription termination factor NusA	-	Transcription elongation factor NusA	aproNOG	K	1	117	2244	0.280904	0.543308	777.678	676.878	2248.34	0	5.21974	8.54673	1.20831	Cyt predominant
BHORF|NC_005956_293229_293306_+3_ATG_25	NC_005956	293229	293306	+3	ATG	75	1	BH_RS01070(p)					ORF_293229..293306_25aa_+3	n to p		25	Unknown	0		CYT	-	-	-	-	-	-	-	-	-	-	-	-	NA	aproNOG	S	0	1	1	NA	NA	0	0	0
BH_RS01075|rso|ens|geno|+17aa_chemg|-8aa_prod|NC_005956_295140_294490_-2_ATG_216	NC_005956	294490	295140	-2	ATG	648	0	BH_RS01075	BH02180	BH02180	294490..295191(-)	NC_005956_02300	ORF_294490..295191_233aa_-2	n to n	BHPROD|MQB277_316118_315492_-2_ATG_208	216	Cytoplasmic	0		CYT	G3DSA:3.30.300.70,G3DSA:2.30.30.180	-	PF02576;Uncharacterised BCR, YhbC family COG0779	-	-	-	-	-	-	SSF74942,SSF75420	-	-	Required for maturation of 30S ribosomal subunits (By similarity)	aproNOG	S	1	18	310	0.429085	0.568492	103.175	59.4755	263.126	0	9.24055	9.99142	0.000906632	Cyt predominant
BH_RS01080|rso|ens|geno|chemg|prod|NC_005956_295970_295269_-3_ATG_233	NC_005956	295269	295970	-3	ATG	699	0	BH_RS01080	BH02190	BH02190	295269..295970(-)	NC_005956_02310	ORF_295269..295970_233aa_-3	n to n	BHPROD|MQB277_316972_316271_-3_ATG_233	233	Cytoplasmic	0		CYT	G3DSA:3.40.50.150	PTHR23417:SF14,PTHR23417	PF02390;Putative methyltransferase	-	-	-	PS51625;SAM-dependent methyltransferase TRMB-type domain profile.	-	-	SSF53335	-	-	Catalyzes the formation of N(7)-methylguanine at position 46 (m7G46) in tRNA (By similarity)	aproNOG	S	1	7	29	0.968818	0.697945	21.3304	10.2005	57.9777	2.5	0	2.3624	1.82402	TM exclusive
BH_RS01085|rso|ens|geno|chemg|prod|NC_005956_297235_295967_-1_ATG_422	NC_005956	295967	297235	-1	ATG	1266	0	BH_RS01085	BH02200	BH02200	295967..297235(-)	NC_005956_02320	ORF_295967..297235_422aa_-1	n to n	BHPROD|MQB277_318237_316969_-1_ATG_422	422	Cytoplasmic	0		CYT	G3DSA:3.30.300.10	PTHR11964,PTHR11964:SF1	PF02773;S-adenosylmethionine synthetase, C-terminal domain,PF00438;S-adenosylmethionine synthetase, N-terminal domain,PF02772;S-adenosylmethionine synthetase, central domain	PIRSF000497	-	PS00376;S-adenosylmethionine synthase signature 1.,PS00377;S-adenosylmethionine synthase signature 2.	-	-	-	SSF55973	TIGR01034;metK: methionine adenosyltransferase	-	Catalyzes the formation of S-adenosylmethionine from methionine and ATP	aproNOG	H	1	50	539	0.568072	0.359602	297.145	297.711	690.612	5.6754e-06	0.000182485	9.97913	1.33082e-07
BHCHEMG|NC_005956_296847_296653_-2_TTG_64	NC_005956	296653	296847	-2	TTG	192	1				296653..296847(-)		ORF_296653..296871_72aa_-2			64	Unknown	0		CYT	-	-	-	-	-	-	-	-	-	-	-	-				0	0	0	NA	NA	0	0	0
BH_RS01090|rso|ens|geno|chemg|prod|NC_005956_297772_297356_-1_ATG_138	NC_005956	297356	297772	-1	ATG	414	0	BH_RS01090	BH02210	BH02210	297356..297772(-)	NC_005956_02330	ORF_297356..297772_138aa_-1	n to n	BHPROD|MQB277_318774_318358_-1_ATG_138	138	Cytoplasmic	0		CYT	G3DSA:1.10.260.40	PTHR10245,PTHR10245:SF7	PF01381;Helix-turn-helix	-	-	-	PS50943;Cro/C1-type HTH domain profile.	-	SM00530;Helix-turn-helix XRE-family like proteins	SSF47413	-	-	Transcriptional regulator	aproNOG	K	1	36	797	0.33227	0.553044	289.419	223.871	606.961	0	9.99892	9.88198	0.0450926	Cyt predominant
BH_RS01095|+6aa_rso|+22aa_chemg|-8aa_prod|NC_005956_299537_297921_-3_ATG_538	NC_005956	297921	299537	-3	ATG	1614	0	BH_RS01095	BH02220	BH02220	297921..299603(-)	NC_005956_02340	ORF_297921..299555_544aa_-3	n to n	BHPROD_+14aa_orf|MQB277_320557_318923_-3_ATG_544	538	CytoplasmicMembrane	7		TMH	G3DSA:3.60.110.10	-	PF00795;Carbon-nitrogen hydrolase	-	-	-	PS50263;Carbon-nitrogen hydrolase domain profile.	-	-	SSF56317	TIGR00546;lnt: apolipoprotein N-acyltransferase	TMhelix;Region of a membrane-bound protein predicted to be embedded in the membrane.	Transfers the fatty acyl group on membrane lipoproteins (By similarity)	aproNOG	M	1	14	113	-0.346055	0.781579	1288.53	1524.54	2598.82	9.9999	0	7.34277	4.77814e-06	TM exclusive
BHCHEMG|NC_005956_297907_298098_+1_ATG_63	NC_005956	297907	298098	+1	ATG	189	1				297907..298098(+)		ORF_297907..298098_63aa_+1			63	Unknown	0		CYT	-	-	-	-	-	-	-	-	-	-	-	-				0	0	0	NA	NA	61.5092	17.4066	233.746
BH_RS01100|rso|ens|geno|chemg|prod|NC_005956_300537_299518_-2_ATG_339	NC_005956	299518	300537	-2	ATG	1017	0	BH_RS01100	BH02230	BH02230	299518..300537(-)	NC_005956_02350	ORF_299518..300537_339aa_-2	n to n	BHPROD|MQB277_321539_320520_-2_ATG_339	339	CytoplasmicMembrane	0		CYT	G3DSA:3.30.465.10,G3DSA:3.10.580.10	PTHR22777	PF03471;Transporter associated domain,PF00571;CBS domain	-	-	-	PS51371;CBS domain profile.	-	SM01091;Transporter associated domain	SSF54631,SSF56176	-	-	CBS domain	aproNOG	P	1	33	415	0.626395	0.351914	105.041	116.238	292.314	8.35195	0	9.99989	2.33511e-09	IM predominant
BH_RS01105|rso|ens|geno|chemg|prod|NC_005956_301116_300640_-2_ATG_158	NC_005956	300640	301116	-2	ATG	474	0	BH_RS01105	BH02240	BH02240	300640..301116(-)	NC_005956_02360	ORF_300640..301116_158aa_-2	n to n	BHPROD|MQB277_322118_321642_-2_ATG_158	158	Cytoplasmic	0		CYT	G3DSA:3.40.390.30	PTHR22881,PTHR22881:SF13	PF02130;Uncharacterized protein family UPF0054	-	-	PS01306;Uncharacterized protein family UPF0054 signature.	-	-	-	SSF55486	TIGR00043;TIGR00043: rRNA maturation RNase YbeY	-	Single strand-specific metallo-endoribonuclease involved in late-stage 70S ribosome quality control and in maturation of the 3' terminus of the 16S rRNA (By similarity)	aproNOG	S	1	6	76	0.771173	0.58471	41.7292	33.4144	93.0165	6.91375	0.000127243	7.83952	0	IM exclusive
BHCHEMG|NC_005956_300845_301021_+2_ATG_58	NC_005956	300845	301021	+2	ATG	174	0				300845..301021(+)		ORF_300845..301021_58aa_+2			58	Unknown	0		CYT	-	-	-	-	-	-	-	-	-	-	-	-				0	0	0	NA	NA	0	0	0
BH_RS01110|rso|ens|geno|chemg|prod|NC_005956_302237_301137_-3_TTG_366	NC_005956	301137	302237	-3	TTG	1098	0	BH_RS01110	BH02250	BH02250	301137..302237(-)	NC_005956_02370	ORF_301137..301895_252aa_-3	n to n	BHPROD|MQB277_323239_322139_-3_TTG_366	366	Cytoplasmic	0		CYT	G3DSA:3.40.50.300	PTHR30473,PTHR30473:SF1	PF02562;PhoH-like protein	-	-	-	-	-	-	SSF52540	-	-	PhoH family	aproNOG	T	1	34	269	0.15404	0.853733	103.953	100.19	254.627	10	0	5.86357	3.19046	TM exclusive
BH_RS01115|rso|ens|geno|chemg|prod|NC_005956_303777_302401_-2_ATG_458	NC_005956	302401	303777	-2	ATG	1374	0	BH_RS01115	BH02260	BH02260	302401..303777(-)	NC_005956_02380	ORF_302401..303777_458aa_-2	n to n	BHPROD|MQB277_324779_323403_-2_ATG_458	458	Cytoplasmic	0		CYT	G3DSA:3.80.30.20	PTHR11918:SF43,PTHR11918	PF00919;Uncharacterized protein family UPF0004,PF04055;Radical SAM superfamily	-	-	PS01278;Methylthiotransferase radical SAM domain signature.	PS51449;Methylthiotransferase N-terminal domain profile.,PS50926;TRAM domain profile.	-	SM00729;Elongator protein 3, MiaB family, Radical SAM	SSF102114	TIGR00089;TIGR00089: radical SAM methylthiotransferase, MiaB/RimO family,TIGR01574;miaB-methiolase: tRNA-i(6)A37 thiotransferase enzyme MiaB	-	Catalyzes the methylthiolation of N6- (dimethylallyl)adenosine (i(6)A), leading to the formation of 2- methylthio-N6-(dimethylallyl)adenosine (ms(2)i(6)A) at position 37 in tRNAs that read codons beginning with uridine (By similarity)	aproNOG	J	1	23	134	0.552475	0.606596	319.975	281.234	930.906	9.9995	5.68434e-13	4.99995	1.20928e-05	TM predominant
BH_RS01120|rso|ens|geno|chemg|prod|NC_005956_304300_303809_-1_ATG_163	NC_005956	303809	304300	-1	ATG	489	0	BH_RS01120	BH02270	BH02270	303809..304300(-)	NC_005956_02390	ORF_303809..304300_163aa_-1	n to n	BHPROD|MQB277_325302_324811_-1_ATG_163	163	Cytoplasmic	0		CYT	G3DSA:3.40.630.30	PTHR23091:SF1,PTHR23091	PF00583;Acetyltransferase (GNAT) family	-	-	-	PS51186;Gcn5-related N-acetyltransferase (GNAT) domain profile.	-	-	SSF55729	TIGR01575;rimI: ribosomal-protein-alanine acetyltransferase	-	Ribosomal-protein-alanine acetyltransferase	aproNOG	S	1	6	28	1.09435	0.664502	6.47412	4.84117	16.2413	4.375	0	4.63349	0.129783	TM exclusive
BHCHEMG|NC_005956_303980_304108_+2_GTG_42	NC_005956	303980	304108	+2	GTG	126	1				303980..304108(+)		ORF_303989..304108_39aa_+2			42	Unknown	0		CYT	-	-	-	-	-	-	-	-	-	-	-	-				0	0	0	NA	NA	0	0	0
BH_RS01125|rso|ens|geno|chemg|prod|NC_005956_304983_304300_-2_ATG_227	NC_005956	304300	304983	-2	ATG	681	0	BH_RS01125	BH02280	BH02280	304300..304983(-)	NC_005956_02400	ORF_304300..304983_227aa_-2	n to n	BHPROD|MQB277_325985_325302_-2_ATG_227	227	Unknown	0		CYT	G3DSA:3.30.420.40	PTHR11735:SF11,PTHR11735	PF00814;Glycoprotease family	-	-	-	-	-	-	SSF53067	TIGR03725;T6A_YeaZ: tRNA threonylcarbamoyl adenosine modification protein YeaZ	-	Peptidase M22 glycoprotease	aproNOG	O	1	11	125	0.443234	0.693194	202.267	224.732	407.812	9.48871	1.77111e-08	4.99714	0.000801687	TM predominant
BH_RS01130|+6aa_rso|NC_005956_306595_305567_-1_ATT_342	NC_005956	305567	306595	-1	ATT	1026	0	BH_RS01130	BH02290	BH02290	305567..306613(-)	NC_005956_02410	ORF_305567..306613_348aa_-1	n to n		342	CytoplasmicMembrane	11		TMH	-	PTHR30106:SF2,PTHR30106	PF03601;Conserved hypothetical protein 698	-	-	-	-	-	-	-	-	TMhelix;Region of a membrane-bound protein predicted to be embedded in the membrane.	UPF0324 membrane protein	aproNOG	S	1	6	13	-1.99311	0.702902	559.744	629.24	1112.63	2.5	0	4.93079	0	IM exclusive
BHCHEMG|NC_005956_305827_305898_+1_ATG_23	NC_005956	305827	305898	+1	ATG	69	1				305827..305898(+)		ORF_305827..305898_23aa_+1			23	Unknown	0		CYT	-	-	-	-	-	-	-	-	-	-	-	-				0	0	0	NA	NA	0	0	0
BHCHEMG|NC_005956_306009_306401_+3_ATG_130	NC_005956	306009	306401	+3	ATG	390	0				306009..306401(+)		ORF_306009..306401_130aa_+3			130	Unknown	0		CYT	-	-	-	-	-	-	-	-	-	-	-	-				0	0	0	NA	NA	0	0	0
BH_RS01135|rso|ens|geno|chemg|prod|NC_005956_307293_306688_-2_ATG_201	NC_005956	306688	307293	-2	ATG	603	0	BH_RS01135	BH02300	BH02300	306688..307293(-)	NC_005956_02420	ORF_306688..307293_201aa_-2	n to n	BHPROD|MQB277_328295_327690_-2_ATG_201	201	Cytoplasmic	0		CYT	-	PTHR30446,PTHR30446:SF0	PF02132;RecR protein,PF13662;Toprim domain	-	-	PS01300;RecR protein signature.	PS50880;Toprim domain profile.	-	SM00493;Target=BH_RS01135|rso|ens|geno|chemg|prod|NC_005956_307293_306688_-2_ATG_201 83 168	SSF111304	TIGR00615;recR: recombination protein RecR	-	May play a role in DNA repair. It seems to be involved in an RecBC-independent recombinational process of DNA repair. It may act with RecF and RecO (By similarity)	aproNOG	L	1	12	130	0.243926	0.832601	108.808	115.419	270.983	9.81358	8.97574e-10	9.95488	0.000812543	IM predominant
BH_RS01140|rso|ens|geno|chemg|prod|NC_005956_307654_307328_-1_ATG_108	NC_005956	307328	307654	-1	ATG	324	0	BH_RS01140	BH02310	BH02310	307328..307654(-)	NC_005956_02430	ORF_307328..307654_108aa_-1	n to n	BHPROD|MQB277_328656_328330_-1_ATG_108	108	Unknown	0	yes	CYT	G3DSA:3.30.1310.10	-	PF02575;YbaB/EbfC DNA-binding family	PIRSF004555	-	-	-	-	-	SSF82607	TIGR00103;DNA_YbaB_EbfC: DNA-binding protein, YbaB/EbfC family	-	Binds to DNA and alters its conformation. May be involved in regulation of gene expression, nucleoid organization and DNA protection (By similarity)	aproNOG	S	1	13	175	-0.22248	0.827828	86.6467	112.219	190.149	1.4218e-11	8.20321	7.30908	0.00569954	Cyt predominant
BH_RS01145|rso|ens|geno|+4aa_chemg|prod|NC_005956_309609_307669_-2_ATG_646	NC_005956	307669	309609	-2	ATG	1938	0	BH_RS01145	BH02320	BH02320	307669..309621(-)	NC_005956_02440	ORF_307669..309609_646aa_-2	n to n	BHPROD|MQB277_330611_328671_-2_ATG_646	646	Cytoplasmic	0		CYT	G3DSA:1.10.8.60,G3DSA:1.20.272.10,G3DSA:3.40.50.300	PTHR11669,PTHR11669:SF6	PF12362;DNA polymerase III gamma and tau subunits C terminal,PF13177;DNA polymerase III, delta subunit,PF12169;DNA polymerase III subunits gamma and tau domain III	-	-	-	-	-	SM00382;ATPases associated with a variety of cellular activities	SSF48019,SSF52540	TIGR02397;dnaX_nterm: DNA polymerase III, subunit gamma and tau	-	dna polymerase iii subunits gamma and tau	aproNOG	L	1	83	1495	0.321444	0.512399	374.021	338.604	797.195	10	0	10	0	IM predominant
BHGENO0273|NC_005956_310265_310408_+2_TTG_47	NC_005956	310265	310408	+2	TTG	141	1			BARHE0273			ORF_310265..310408_47aa_+2			47	Unknown	0		CYT	-	-	-	-	-	-	-	-	-	-	-	-				0	0	0	NA	NA	28.4733	25.8246	50.825
BH_RS01150|rso|ens|geno|+15aa_chemg|prod|NC_005956_311290_310883_-1_ATG_135	NC_005956	310883	311290	-1	ATG	405	1	BH_RS01150	BH02330	BH02330	310883..311335(-)	NC_005956_02460	ORF_310883..311290_135aa_-1	n to n	BHPROD|MQB277_332292_331885_-1_ATG_135	135	Unknown	0	yes	SpI	-	-	-	-	-	-	-	SignalP-noTM	-	-	-	-				1	49	745	-0.298602	0.605599	2192.5	2076.98	4148.57	0.000316663	1.03046e-06	4.63166	5.25005
BHGENO0275|NC_005956_311583_311440_-2_CTG_47	NC_005956	311440	311583	-2	CTG	141	1			BARHE0275			ORF_311440..311652_70aa_-2			47	Unknown	0		CYT	-	-	-	-	-	-	-	-	-	-	-	-				0	0	0	NA	NA	13.8636	1.11471	52.3913
BH_RS01155|rso|ens|geno|prod|NC_005956_311498_311758_+2_ATG_86	NC_005956	311498	311758	+2	ATG	258	1	BH_RS01155	BH02340	BH02340		NC_005956_02470	ORF_311498..311758_86aa_+2	n to n	BHPROD|MQB277_332500_332760_+1_ATG_86	86	Unknown	1		TMH	-	-	-	-	-	-	-	-	-	-	-	TMhelix;Region of a membrane-bound protein predicted to be embedded in the membrane.				0	0	0	NA	NA	3.68585	1.99546	7.88209
BH_RS01160|rso|ens|geno|chemg|prod|NC_005956_312629_311766_-3_ATG_287	NC_005956	311766	312629	-3	ATG	861	0	BH_RS01160	BH02350	BH02350	311766..312629(-)	NC_005956_02480	ORF_311766..312629_287aa_-3	n to n	BHPROD|MQB277_333631_332768_-3_ATG_287	287	Cytoplasmic	0		CYT	G3DSA:3.40.190.10,G3DSA:3.30.70.260	PTHR21022:SF0,PTHR21022	PF00800;Prephenate dehydratase	PIRSF001500	-	PS00857;Prephenate dehydratase signature 1.	PS51671;ACT domain profile.,PS51171;Prephenate dehydratase domain profile.	-	-	SSF53850,SSF55021	-	-	Prephenate dehydratase	aproNOG	E	1	6	26	0.018859	1	203.656	308.76	422.317	0.15625	5	4.97207	0.00279273	Cyt predominant
BH_RS01165|rso|ens|geno|chemg|prod|NC_005956_313357_312626_-1_ATG_243	NC_005956	312626	313357	-1	ATG	729	0	BH_RS01165	BH02360	BH02360	312626..313357(-)	NC_005956_02490	ORF_312626..313357_243aa_-1	n to n	BHPROD|MQB277_334359_333628_-1_ATG_243	243	Cytoplasmic	0		CYT	G3DSA:3.90.550.10	PTHR21485:SF4,PTHR21485	PF02348;Cytidylyltransferase	-	-	-	-	-	-	SSF53448	TIGR00466;kdsB: 3-deoxy-D-manno-octulosonate cytidylyltransferase	-	Activates KDO (a required 8-carbon sugar) for incorporation into bacterial lipopolysaccharide in Gram-negative bacteria (By similarity)	aproNOG	M	1	20	230	0.0622516	0.951856	161.878	117.714	414.041	2.7167e-06	1.97597	9.64398	0.0602676
BH_RS01170|rso|ens|geno|chemg|prod|NC_005956_313464_314015_+3_ATG_183	NC_005956	313464	314015	+3	ATG	549	0	BH_RS01170	BH02370	BH02370	313464..314015(+)	NC_005956_02500	ORF_313464..314015_183aa_+3	n to n	BHPROD|MQB277_334466_335017_+2_ATG_183	183	CytoplasmicMembrane	1		CYT	G3DSA:1.10.760.10	PTHR11961:SF2,PTHR11961	PF00034;Cytochrome c	-	PR00604;Class IA and IB cytochrome C signature	-	PS51007;Cytochrome c family profile.	-	-	SSF46626	-	TMhelix;Region of a membrane-bound protein predicted to be embedded in the membrane.	cytochrome c	aproNOG	C	1	13	96	-0.81379	0.536383	3430.33	3976.95	5837.7	9.99992	0	4.99996	3.95872e-06	TM exclusive
BH_RS01175|rso|ens|geno|chemg|prod|NC_005956_314154_315275_+3_ATG_373	NC_005956	314154	315275	+3	ATG	1119	0	BH_RS01175	BH02380	BH02380	314154..315275(+)	NC_005956_02510	ORF_314154..315275_373aa_+3	n to n	BHPROD|MQB277_335156_336277_+2_ATG_373	373	CytoplasmicMembrane	6		TMH	G3DSA:1.10.3720.10	PTHR30465,PTHR30465:SF40	PF00528;Binding-protein-dependent transport system inner membrane component	-	-	-	PS50928;ABC transporter integral membrane type-1 domain profile.	-	-	SSF161098	-	TMhelix;Region of a membrane-bound protein predicted to be embedded in the membrane.	ABC transporter permease protein	aproNOG	P	1	9	55	-0.228827	0.916775	813.286	1452	1213.4	9.99577	0	6.71794	0.000112697	TM exclusive
BH_RS01180|rso|ens|geno|+1aa_chemg|prod|NC_005956_315275_316417_+2_ATG_380	NC_005956	315275	316417	+2	ATG	1140	0	BH_RS01180	BH02390	BH02390	315272..316417(+)	NC_005956_02520	ORF_315275..316417_380aa_+2	n to n	BHPROD|MQB277_336277_337419_+1_ATG_380	380	CytoplasmicMembrane	5		CYT	G3DSA:1.10.3720.10	PTHR30325	PF00528;Binding-protein-dependent transport system inner membrane component	-	-	-	PS50928;ABC transporter integral membrane type-1 domain profile.	-	-	SSF161098	-	TMhelix;Region of a membrane-bound protein predicted to be embedded in the membrane.	Binding-protein-dependent transport systems inner membrane component	aproNOG	P	1	22	230	-0.940106	0.281197	102.188	197.636	166.35	10	0	9.88736	1.46385e-08	IM predominant
BHCHEMG|NC_005956_318119_317970_-3_ATG_49	NC_005956	317970	318119	-3	ATG	147	1				317970..318119(-)		ORF_317970..318119_49aa_-3			49	Unknown	0		CYT	-	-	-	-	-	-	-	-	-	-	-	-	Molybdopterin biosynthesis protein	aproNOG	H	0	0	0	NA	NA	45.1296	77.0863	70.8697
BH_RS01185|rso|ens|geno|chemg|prod|NC_005956_316414_318024_+1_ATG_536	NC_005956	316414	318024	+1	ATG	1608	0	BH_RS01185	BH02400	BH02400	316414..318024(+)	NC_005956_02530	ORF_316414..318024_536aa_+1	n to n	BHPROD|MQB277_337416_339026_+3_ATG_536	536	CytoplasmicMembrane	0		CYT	G3DSA:3.40.50.300	PTHR24220,PTHR24220:SF349	PF00005;ABC transporter,PF08352;Oligopeptide/dipeptide transporter, C-terminal region	-	-	PS00211;ABC transporters family signature.	PS50893;ATP-binding cassette, ABC transporter-type domain profile.	-	SM00382;ATPases associated with a variety of cellular activities	SSF52540	-	-	ABC transporter	aproNOG	S	1	46	485	-0.651334	0.321165	432.725	674.604	809.014	10	0	7.34279	1.08634e-09	IM predominant
BH_RS01190|rso|ens|geno|chemg|prod|NC_005956_319011_318247_-2_ATG_254	NC_005956	318247	319011	-2	ATG	762	0	BH_RS01190	BH02410	BH02410	318247..319011(-)	NC_005956_02540	ORF_318247..319011_254aa_-2	n to n	BHPROD|MQB277_340013_339249_-2_ATG_254	254	Cytoplasmic	0		CYT	G3DSA:3.40.50.720	PTHR10953:SF102,PTHR10953	PF00899;ThiF family,PF05237;MoeZ/MoeB domain	-	-	-	-	-	-	SSF69572	-	TMhelix;Region of a membrane-bound protein predicted to be embedded in the membrane.	Molybdopterin biosynthesis protein	aproNOG	H	1	20	173	-0.0908995	0.938741	608.4	612.857	1480.73	1.34914e-11	7.90463	9.50761	1.83517e-07	Cyt predominant
BHORF|NC_005956_318344_318478_+2_ATG_44	NC_005956	318344	318478	+2	ATG	132	1						ORF_318344..318478_44aa_+2		BHORF|MQB277_339346_339480_+1_ATG_44	44	Unknown	0	yes	CYT	-	-	-	-	-	-	-	-	-	-	-	-				1	1	6	NA	NA	0	0	0	4.375	0	3.7995	0	IM exclusive
BH_RS01195|rso|ens|geno|chemg|prod|NC_005956_319100_320038_+2_ATG_312	NC_005956	319100	320038	+2	ATG	936	0	BH_RS01195	BH02420	BH02420	319100..320038(+)	NC_005956_02550	ORF_319100..320038_312aa_+2	n to n	BHPROD|MQB277_340102_341040_+1_ATG_312	312	Cytoplasmic	0		CYT	G3DSA:3.30.1490.20,G3DSA:3.30.470.20,G3DSA:3.40.50.20	PTHR21621,PTHR21621:SF4	PF02955;Prokaryotic glutathione synthetase, ATP-grasp domain,PF02951;Prokaryotic glutathione synthetase, N-terminal domain	-	-	-	PS50975;ATP-grasp fold profile.	-	-	SSF52440,SSF56059	TIGR01380;glut_syn: glutathione synthase	-	glutathione synthase	aproNOG	H	1	37	428	0.614763	0.356122	1159.67	1405.84	2513.57	0	9.99913	9.34756	0.346927	Cyt predominant
BH_RS01200|rso|ens|geno|+6aa_chemg|prod|NC_005956_320188_321234_+1_ATG_348	NC_005956	320188	321234	+1	ATG	1044	0	BH_RS01200	BH02430	BH02430	320170..321234(+)	NC_005956_02560	ORF_320170..321234_354aa_+1	n to n	BHPROD|MQB277_341190_342236_+3_ATG_348	348	CytoplasmicMembrane	0	yes	SpI	G3DSA:3.40.190.10	PTHR30570:SF1,PTHR30570	PF12849;PBP superfamily domain	-	-	-	-	-	-	SSF53850	-	-	Phosphate ABC transporter, periplasmic phosphate-binding protein	aproNOG	P	1	45	488	-0.424169	0.517037	2991.14	3743.57	7235.62	0	10	7.94309	0.576248	Cyt predominant
BH_RS01205|rso|ens|geno|+4aa_chemg|prod|NC_005956_321300_322760_+3_ATG_486	NC_005956	321300	322760	+3	ATG	1458	0	BH_RS01205	BH02440	BH02440	321288..322760(+)	NC_005956_02570	ORF_321300..322760_486aa_+3	n to n	BHPROD|MQB277_342302_343762_+2_ATG_486	486	CytoplasmicMembrane	9		TMH	G3DSA:1.10.3720.10	PTHR30425,PTHR30425:SF3	PF12501;Phosphate ATP-binding cassette transporter,PF00528;Binding-protein-dependent transport system inner membrane component	-	-	-	PS50928;ABC transporter integral membrane type-1 domain profile.,PS51257;Prokaryotic membrane lipoprotein lipid attachment site profile.	-	-	SSF161098	TIGR02138;phosphate_pstC: phosphate ABC transporter, permease protein PstC	TMhelix;Region of a membrane-bound protein predicted to be embedded in the membrane.	phosphate ABC transporter, permease	aproNOG	P	1	10	83	-0.354712	0.812073	98.3577	103.896	231.018	9.99925	0	5.95	0	IM exclusive
BHCHEMG|NC_005956_323655_323461_-2_ATG_64	NC_005956	323461	323655	-2	ATG	192	0				323461..323655(-)		ORF_323461..323655_64aa_-2			64	Unknown	0		CYT	-	-	-	-	-	-	-	-	-	-	-	-				0	0	0	NA	NA	0	0	0
BH_RS01210|rso|ens|geno|chemg|prod|NC_005956_322757_324049_+2_ATG_430	NC_005956	322757	324049	+2	ATG	1290	0	BH_RS01210	BH02450	BH02450	322757..324049(+)	NC_005956_02580	ORF_322757..324049_430aa_+2	n to n	BHPROD|MQB277_343759_345051_+1_ATG_430	430	CytoplasmicMembrane	6		TMH	G3DSA:1.10.3720.10	PTHR30425,PTHR30425:SF2	PF11812;Domain of unknown function (DUF3333),PF00528;Binding-protein-dependent transport system inner membrane component	-	-	-	PS50928;ABC transporter integral membrane type-1 domain profile.	-	-	SSF161098	TIGR00974;3a0107s02c: phosphate ABC transporter, permease protein PstA	TMhelix;Region of a membrane-bound protein predicted to be embedded in the membrane.	phosphate ABC transporter, permease	aproNOG	P	1	11	93	-0.396178	0.773964	98.5106	74.6646	238.227	9.99971	1.42109e-13	7.34083	0.000392226	IM predominant
BH_RS01215|rso|ens|geno|+4aa_chemg|prod|NC_005956_324108_324866_+3_ATG_252	NC_005956	324108	324866	+3	ATG	756	0	BH_RS01215	BH02460	BH02460	324096..324866(+)	NC_005956_02590	ORF_324108..324866_252aa_+3	n to n	BHPROD|MQB277_345110_345868_+2_ATG_252	252	CytoplasmicMembrane	0		CYT	G3DSA:3.40.50.300	PTHR24220,PTHR24220:SF76	PF00005;ABC transporter	-	-	PS00211;ABC transporters family signature.	PS50893;ATP-binding cassette, ABC transporter-type domain profile.,PS51238;Phosphate import ATP-binding protein pstB family profile.	-	SM00382;ATPases associated with a variety of cellular activities	SSF52540	TIGR00972;3a0107s01c2: phosphate ABC transporter, ATP-binding protein	-	Part of the ABC transporter complex PstSACB involved in phosphate import. Responsible for energy coupling to the transport system (By similarity)	aproNOG	P	1	32	681	-0.402152	0.496703	561.771	546.397	1382.16	9.99974	0	9.99986	4.00373e-05	IM predominant
BH_RS01220|rso|ens|geno|chemg|prod|NC_005956_324888_325610_+3_ATG_240	NC_005956	324888	325610	+3	ATG	720	0	BH_RS01220	BH02470	BH02470	324888..325610(+)	NC_005956_02600	ORF_324888..325610_240aa_+3	n to n	BHPROD|MQB277_345890_346612_+2_ATG_240	240	Cytoplasmic	0		CYT	G3DSA:1.20.58.220	PTHR10010,PTHR10010:SF14	PF01895;PhoU domain	PIRSF003107	-	-	-	-	-	SSF109755	TIGR02135;phoU_full: phosphate transport system regulatory protein PhoU	-	Plays a role in the regulation of phosphate uptake (By similarity)	aproNOG	P	1	22	219	0.0551226	0.960097	394.665	497.611	881.17	9.99182	0	9.9465	0.00199388	IM predominant
BH_RS08435|-30aa_geno|NC_005956_326183_325956_-3_TTG_75	NC_005956	325956	326183	-3	TTG	225	1	BH_RS08435	BH02480(p)	BARHE0289			ORF_325956..326183_75aa_-3	p to n		75	Unknown	0		CYT	G3DSA:1.10.443.10	-	-	-	-	-	-	-	-	-	-	-	Integrase	aproNOG	S	0	0	0	NA	NA	80.5203	58.9959	208.506
BHGENO0290|NC_005956_326682_326849_+3_TTG_55	NC_005956	326682	326849	+3	TTG	165	1			BARHE0290			ORF_326682..326849_55aa_+3			55	CytoplasmicMembrane	1		TMH	-	-	-	-	-	-	-	-	-	-	-	TMhelix;Region of a membrane-bound protein predicted to be embedded in the membrane.				0	0	0	NA	NA	380.452	308.449	771.122
BH_RS01230|rso|ens|geno|+4aa_chemg|prod|NC_005956_327075_327920_+3_ATG_281	NC_005956	327075	327920	+3	ATG	843	0	BH_RS01230	BH02490	BH02490	327063..327920(+)	NC_005956_02610	ORF_327075..327920_281aa_+3	n to n	BHPROD|MQB277_348077_348922_+2_ATG_281	281	Unknown	0	yes	SpII	-	-	PF07486;Cell Wall Hydrolase	-	-	-	PS51257;Prokaryotic membrane lipoprotein lipid attachment site profile.	SignalP-noTM	-	-	-	TMhelix;Region of a membrane-bound protein predicted to be embedded in the membrane.	cell wall hydrolase, SleB	aproNOG	M	1	30	1274	-0.645575	0.206639	630.485	915.405	1247.32	10	0	1.81644	7.94186	OM predominant
BH_RS01235|rso|ens|geno|+2aa_chemg|prod|NC_005956_327952_329199_+1_ATG_415	NC_005956	327952	329199	+1	ATG	1245	0	BH_RS01235	BH02500	BH02500	327946..329199(+)	NC_005956_02620	ORF_327952..329199_415aa_+1	n to n	BHPROD|MQB277_348954_350201_+3_ATG_415	415	Unknown	0		CYT	-	-	PF02073;Thermophilic metalloprotease (M29)	-	PR00919;Thermophilic metalloprotease (M29) signature	-	-	-	-	SSF144052	-	-	Aminopeptidase	aproNOG	E	1	44	782	-0.124797	0.829927	523.97	797.61	1092.83	0	10	9.88034	0.0569485	Cyt predominant
BH_RS01240|rso|ens|geno|chemg|prod|NC_005956_329258_330133_+2_ATG_291	NC_005956	329258	330133	+2	ATG	873	0	BH_RS01240	BH02510	BH02510	329258..330133(+)	NC_005956_02630	ORF_329258..330133_291aa_+2	n to n	BHPROD|MQB277_350260_351135_+1_ATG_291	291	Cytoplasmic	0		CYT	G3DSA:3.20.190.10,G3DSA:1.10.8.50	PTHR22993:SF9,PTHR22993	PF06827;Zinc finger found in FPG and IleRS,PF06831;Formamidopyrimidine-DNA glycosylase H2TH domain,PF01149;Formamidopyrimidine-DNA glycosylase N-terminal domain	-	-	PS01242;Zinc finger FPG-type signature.	PS51068;Formamidopyrimidine-DNA glycosylase catalytic domain profile.,PS51066;Zinc finger FPG-type profile.	-	SM00898;Formamidopyrimidine-DNA glycosylase N-terminal domain	SSF81624,SSF57716,SSF46946	TIGR00577;fpg: DNA-formamidopyrimidine glycosylase	-	Involved in base excision repair of DNA damaged by oxidation or by mutagenic agents. Acts as DNA glycosylase that recognizes and removes damaged bases. Has a preference for oxidized purines, such as 7,8-dihydro-8-oxoguanine (8-oxoG). Has AP (apurinic apyrimidinic) lyase activity and introduces nicks in the DNA strand. Cleaves the DNA backbone by beta-delta elimination to generate a single-strand …	aproNOG	L	1	26	247	-0.464141	0.582585	624.114	909.539	1365.73	10	0	6.7195	8.15893e-10	IM predominant
BHCHEMG|NC_005956_331436_331341_-3_ATG_31	NC_005956	331341	331436	-3	ATG	93	1				331341..331436(-)		ORF_331341..331436_31aa_-3			31	Unknown	0		CYT	-	-	-	-	-	-	-	-	-	-	-	-				0	0	0	NA	NA	0	0	0
BH_RS01245|rso|ens|geno|chemg|prod|NC_005956_330217_331605_+1_ATG_462	NC_005956	330217	331605	+1	ATG	1386	0	BH_RS01245	BH02520	BH02520	330217..331605(+)	NC_005956_02640	ORF_330217..331605_462aa_+1	n to n	BHPROD|MQB277_351219_352607_+3_ATG_462	462	Cytoplasmic	0		CYT	G3DSA:3.30.70.360,G3DSA:3.40.630.10	PTHR11014:SF72,PTHR11014	PF01546;Peptidase family M20/M25/M40,PF07687;Peptidase dimerisation domain	-	-	-	-	-	-	SSF53187	-	-	peptidase, M20	aproNOG	E	1	41	265	0.390082	0.62693	423.751	275.087	1228.85	0	9.97584	9.392	3.37794e-05	Cyt predominant
BH_RS01250|rso|ens|geno|chemg|prod|NC_005956_331606_332226_+1_ATG_206	NC_005956	331606	332226	+1	ATG	618	0	BH_RS01250	BH02530	BH02530	331606..332226(+)	NC_005956_02650	ORF_331606..332226_206aa_+1	n to n	BHPROD|MQB277_352608_353228_+3_ATG_206	206	Cytoplasmic	0		CYT	G3DSA:3.30.420.10	PTHR12124	PF01612;3'-5' exonuclease	-	-	-	-	-	SM00474;3'-5' exonuclease	SSF53098	-	-	3-5 exonuclease	aproNOG	J	1	28	308	0.127516	0.873057	1421.92	1094.72	4144.92	0	10	5.75943	3.38564	Cyt predominant
BHGENO0296|NC_005956_332366_332229_-3_ATG_45	NC_005956	332229	332366	-3	ATG	135	1			BARHE0296			ORF_332229..332366_45aa_-3			45	Unknown	0		CYT	-	-	-	-	-	-	-	-	-	-	-	-				0	0	0	NA	NA	36.0775	17.5487	71.4262
BH_RS01255|rso|ens|geno|+9aa_chemg|prod|NC_005956_332819_333130_+2_ATG_103	NC_005956	332819	333130	+2	ATG	309	1	BH_RS01255	BH02540	BH02540	332792..333130(+)	NC_005956_02660	ORF_332792..333130_112aa_+2	n to n	BHPROD|MQB277_353821_354132_+1_ATG_103	103	Unknown	0	yes	SpI	-	-	-	-	-	-	-	SignalP-noTM	-	-	-	-				1	6	78	3.23185	0.0223637	108.317	25.4235	251.036	9.99943	0	1.17123	4.511	TM exclusive
BHCHEMG|NC_005956_333536_333664_+2_CTG_42	NC_005956	333536	333664	+2	CTG	126	1				333536..333664(+)		ORF_333566..333664_32aa_+2			42	Unknown	0		CYT	-	-	-	-	-	-	-	-	-	-	-	-				0	0	0	NA	NA	196.663	103.287	255.458
BHORF|NC_005956_333985_333764_-1_ATG_73	NC_005956	333764	333985	-1	ATG	219	1						ORF_333764..333985_73aa_-1		BHORF|MQB277_354987_354766_-1_ATG_73	73	Unknown	0		CYT	-	-	-	-	-	-	-	-	-	-	-	-				0	1	2	NA	NA	96.6944	105.295	200.662
BH_RS01260|rso|ens|geno|+18aa_chemg|prod|NC_005956_334187_335017_+2_ATG_276	NC_005956	334187	335017	+2	ATG	828	0	BH_RS01260	BH02550	BH02550	334133..335017(+)	NC_005956_02670	ORF_334145..335017_290aa_+2	n to n	BHPROD|MQB277_355189_356019_+1_ATG_276	276	OuterMembrane	0	yes	SpI	G3DSA:2.40.160.20	-	PF13505;Outer membrane protein beta-barrel domain	-	-	-	-	SignalP-noTM	-	SSF56925	-	-	K16079 outer membrane immunogenic protein	aproNOG	M	1	129	4943	2.08219	2.51429e-06	9067.41	6784.26	15126.7	10	0	0	10	OM predominant
BH_RS01265|rso|ens|geno|chemg|prod|NC_005956_335351_336190_+2_ATG_279	NC_005956	335351	336190	+2	ATG	837	0	BH_RS01265	BH02560	BH02560	335351..336190(+)	NC_005956_02680	ORF_335351..336190_279aa_+2	n to n	BHPROD|MQB277_356353_357192_+1_ATG_279	279	OuterMembrane	0	yes	SpI	G3DSA:2.40.160.20	-	PF02530;Porin subfamily	-	-	-	-	SignalP-noTM	-	SSF56925	-	-	K16079 outer membrane immunogenic protein	aproNOG	M	1	438	23833	0.34239	0.398754	105713	75197	345000	10	0	0	10	OM predominant
BHORF|NC_005956_336556_336398_-1_ATG_52	NC_005956	336398	336556	-1	ATG	156	1						ORF_336398..336556_52aa_-1			52	Unknown	0		CYT	-	-	-	-	-	-	-	-	-	-	-	-				0	1	1	NA	NA	124.641	78.9615	236.885
BH_RS01270|rso|ens|geno|+7aa_chemg|prod|NC_005956_336688_337863_+1_ATG_391	NC_005956	336688	337863	+1	ATG	1173	0	BH_RS01270	BH02570	BH02570	336667..337863(+)	NC_005956_02690	ORF_336688..337863_391aa_+1	n to n	BHPROD|MQB277_357690_358865_+3_ATG_391	391	OuterMembrane	0	yes	SpI	G3DSA:2.40.160.20	-	PF13505;Outer membrane protein beta-barrel domain	-	-	-	-	SignalP-noTM	-	SSF56925	-	-	K16079 outer membrane immunogenic protein	aproNOG	M	1	202	6435	0.642755	0.12855	12600.9	2859.36	32498.2	10	0	0	10	OM predominant
BHCHEMG|NC_005956_337978_338085_+1_GTG_35	NC_005956	337978	338085	+1	GTG	105	1				337978..338085(+)		ORF_337981..338085_34aa_+1			35	Unknown	0		CYT	-	-	-	-	-	-	-	-	-	-	-	-				0	0	0	NA	NA	78.2427	28.4082	300.735
BHCHEMG|NC_005956_339722_339438_-3_ATG_94	NC_005956	339438	339722	-3	ATG	282	0				339438..339722(-)		ORF_339438..339722_94aa_-3			94	Unknown	0		CYT	-	-	-	-	-	-	-	-	-	-	-	-				0	0	0	NA	NA	0	0	0
BHCHEMG|NC_005956_340127_339993_-3_ATG_44	NC_005956	339993	340127	-3	ATG	132	0				339993..340127(-)		ORF_339993..340127_44aa_-3			44	Unknown	0		CYT	-	-	-	-	-	-	PS51257;Prokaryotic membrane lipoprotein lipid attachment site profile.	-	-	-	-	-				0	0	0	NA	NA	0	0	0
BHCHEMG|NC_005956_340738_340538_-1_CTG_66	NC_005956	340538	340738	-1	CTG	198	1				340538..340738(-)		ORF_340538..340726_62aa_-1			66	Unknown	0		CYT	-	-	-	-	-	-	-	-	-	-	-	-				0	0	0	NA	NA	0	0	0
BH_RS01275|rso|ens|geno|chemg|prod|NC_005956_338116_341031_+1_ATG_971	NC_005956	338116	341031	+1	ATG	2913	0	BH_RS01275	BH02580	BH02580	338116..341031(+)	NC_005956_02700	ORF_338116..341031_971aa_+1	n to n	BHPROD|MQB277_359118_362033_+3_ATG_971	971	Cytoplasmic	0		CYT	G3DSA:3.90.740.10,G3DSA:3.40.50.620,G3DSA:1.10.730.10	PTHR11946:SF9,PTHR11946	PF00133;tRNA synthetases class I (I, L, M and V),PF08264;Anticodon-binding domain of tRNA	-	PR00984;Isoleucyl-tRNA synthetase signature	PS00178;Aminoacyl-transfer RNA synthetases class-I signature.	-	-	-	SSF52374,SSF47323,SSF50677	TIGR00392;ileS: isoleucine--tRNA ligase	-	amino acids such as valine, to avoid such errors it has two additional distinct tRNA(Ile)-dependent editing activities. One activity is designated as 'pretransfer' editing and involves the hydrolysis of activated Val-AMP. The other activity is designated 'posttransfer' editing and involves deacylation of mischarged Val-tRNA(Ile) (By similarity)	aproNOG	J	1	67	594	0.232646	0.703504	1187.64	1143.13	3703.62	0	10	4.98577	0.00812631	Cyt predominant
BHCHEMG|NC_005956_340868_341101_+2_GTG_77	NC_005956	340868	341101	+2	GTG	231	1				340868..341101(+)		ORF_340871..341101_76aa_+2			77	Unknown	1	yes	CYT	-	-	-	-	-	-	-	-	-	-	-	TMhelix;Region of a membrane-bound protein predicted to be embedded in the membrane.				0	0	0	NA	NA	8.86224	15.6419	34.4121
BH_RS01280|rso|ens|geno|chemg|prod|NC_005956_341227_341820_+1_GTG_197	NC_005956	341227	341820	+1	GTG	591	0	BH_RS01280	BH02590	BH02590	341227..341820(+)	NC_005956_02710	ORF_341263..341820_185aa_+1	n to n	BHPROD|MQB277_362229_362822_+3_GTG_197	197	Unknown	0	yes	SpII	-	-	-	-	-	-	PS51257;Prokaryotic membrane lipoprotein lipid attachment site profile.	-	-	-	-	TMhelix;Region of a membrane-bound protein predicted to be embedded in the membrane.	NA	aproNOG	S	1	32	392	-0.801934	0.257097	172.37	205.097	440.687	10	0	0.0438637	9.92474	OM predominant
BHORF|NC_005956_342037_341852_-1_ATG_61	NC_005956	341852	342037	-1	ATG	183	1						ORF_341852..342061_69aa_-1			61	Unknown	0		CYT	-	-	-	-	-	-	-	-	-	-	-	-				0	1	1	NA	NA	1.93096	3.33693	4.17117
BH_RS01285|rso|ens|geno|chemg|prod|NC_005956_342329_341883_-3_ATG_148	NC_005956	341883	342329	-3	ATG	444	0	BH_RS01285	BH02600	BH02600	341883..342329(-)	NC_005956_02720	ORF_341883..342329_148aa_-3	n to n	BHPROD|MQB277_363331_362885_-3_ATG_148	148	Cytoplasmic	0		CYT	G3DSA:3.40.140.10	PTHR11079	PF00383;Cytidine and deoxycytidylate deaminase zinc-binding region	-	-	PS00903;Cytidine and deoxycytidylate deaminases zinc-binding region signature.	PS51747;Cytidine and deoxycytidylate deaminases domain profile.	-	-	SSF53927	-	-	deaminase	aproNOG	FJ	1	4	4	NA	NA	29.066	32.7538	58.2447	0.0390625	6.875	0	0	Cyt predominant
BHCHEMG|NC_005956_343398_343520_+3_TTG_40	NC_005956	343398	343520	+3	TTG	120	1				343398..343520(+)		ORF_343347..343520_57aa_+3			40	Unknown	0	yes	CYT	-	-	-	-	-	-	-	-	-	-	-	-				0	0	0	NA	NA	0	0	0
BHCHEMG|NC_005956_343608_343859_+3_ATG_83	NC_005956	343608	343859	+3	ATG	249	1				343608..343859(+)		ORF_343608..343859_83aa_+3			83	Unknown	0		CYT	-	-	-	-	-	-	-	-	-	-	-	-				0	0	0	NA	NA	0	0	0
BH_RS01290|rso|ens|geno|+33aa_chemg|NC_005956_342605_344002_+2_ATG_465	NC_005956	342605	344002	+2	ATG	1395	0	BH_RS01290	BH02610	BH02610	342506..344002(+)	NC_005956_02730	ORF_342506..344002_498aa_+2	n to n	BHPROD|MQB277_363508_365004_+1_ATG_498	465	Cytoplasmic	0		CYT	G3DSA:3.10.290.10	PTHR21600:SF2,PTHR21600	PF00849;RNA pseudouridylate synthase,PF01479;S4 domain	-	-	PS01149;Rsu family of pseudouridine synthase signature.	PS50889;S4 RNA-binding domain profile.	-	SM00363;S4 RNA-binding domain	SSF55120,SSF55174	TIGR00093;TIGR00093: pseudouridine synthase	-	Pseudouridine synthase	aproNOG	J	1	62	496	1.4576	0.0216938	1070.89	1305.99	2386.51	9.9903	3.62377e-13	0	10	OM predominant
BH_RS01295|rso|ens|geno|+4aa_chemg|prod|NC_005956_343983_344552_+3_GTG_189	NC_005956	343983	344552	+3	GTG	567	0	BH_RS01295	BH02620	BH02620	343971..344552(+)	NC_005956_02740	ORF_344319..344552_77aa_+3	n to n	BHPROD|MQB277_364985_365554_+2_GTG_189	189	Cytoplasmic	0		CYT	G3DSA:3.40.50.150	PTHR18895,PTHR18895:SF60	PF03602;Conserved hypothetical protein 95	PIRSF004553	-	-	-	-	-	SSF53335	TIGR00095;TIGR00095: 16S rRNA (guanine(966)-N(2))-methyltransferase RsmD	-	Methyltransferase	aproNOG	L	1	10	79	0.575942	0.682526	69.0625	71.6344	135.225	2.18249e-05	6.61096	7.76511	0.340314	Cyt predominant
BH_RS01300|geno|NC_005956_344959_344762_-1_ATG_65	NC_005956	344762	344959	-1	ATG	195	1	BH_RS01300		BARHE0306			ORF_344762..344959_65aa_-1	0 to n		65	Unknown	1		CYT	-	-	-	-	-	-	-	-	-	-	-	TMhelix;Region of a membrane-bound protein predicted to be embedded in the membrane.				0	0	0	NA	NA	12.5322	5.59162	23.4149
BHGENO0307|NC_005956_345181_345047_-1_ATG_44	NC_005956	345047	345181	-1	ATG	132	1			BARHE0307			ORF_345047..345181_44aa_-1			44	Unknown	0		CYT	-	-	-	-	-	-	-	-	-	-	-	-				0	0	0	NA	NA	27.111	33.4412	77.4722
BHGENO0308|prod|NC_005956_345580_345795_+1_ATG_71	NC_005956	345580	345795	+1	ATG	213	1	BH_RS01305(p)		BARHE0308		NC_005956_02750	ORF_345580..345795_71aa_+1	0 to p	BHPROD|MQB277_366582_366797_+3_ATG_71	71	Unknown	0		CYT	-	-	-	-	-	-	-	-	-	-	-	-	UPF0310 protein	aproNOG	S	0	0	0	NA	NA	304.883	308.449	657.306
BHPROD|NC_005956_346603_346737_+1_ATG_44	NC_005956	346603	346737	+1	ATG	132	1					NC_005956_02760	ORF_346603..346737_44aa_+1			44	Unknown	0		CYT	-	-	-	-	-	-	-	-	-	-	-	-				0	0	0	NA	NA	201.022	305.053	383.821
BHGENO0309|+25aa_prod|NC_005956_346913_347035_+2_ATG_40	NC_005956	346913	347035	+2	ATG	120	1			BARHE0309		NC_005956_02770	ORF_346838..347035_65aa_+2		BHPROD|MQB277_367840_368037_+1_ATG_65	40	CytoplasmicMembrane	0	yes	CYT	-	-	-	-	-	-	-	-	-	-	-	TMhelix;Region of a membrane-bound protein predicted to be embedded in the membrane.	Polyketide cyclase / dehydrase and lipid transport	aproNOG	S	0	0	0	NA	NA	30.5969	38.969	63.7674
BHGENO0310|NC_005956_347332_347204_-1_ATG_42	NC_005956	347204	347332	-1	ATG	126	1			BARHE0310			ORF_347204..347332_42aa_-1			42	Unknown	0		CYT	-	-	-	-	-	-	-	-	-	-	-	-				0	0	0	NA	NA	289.998	245.364	515.635
BH_RS01310|rso|ens|geno|chemg|prod|NC_005956_347407_348738_+1_ATG_443	NC_005956	347407	348738	+1	ATG	1329	0	BH_RS01310	BH02630	BH02630	347407..348738(+)	NC_005956_02780	ORF_347407..348738_443aa_+1	n to n	BHPROD|MQB277_368409_369740_+3_ATG_443	443	Cytoplasmic	0		CYT	-	PTHR30624:SF1,PTHR30624	PF01523;Putative modulator of DNA gyrase	-	-	-	-	-	-	SSF111283	-	-	peptidase U62, modulator of DNA gyrase	aproNOG	S	1	41	552	0.309349	0.618583	1313.78	1707.32	2664.34	0	10	9.90909	0.0276474	Cyt predominant
BH_RS01315|-26aa_rso|chemg|prod|NC_005956_348725_349528_+2_TTG_267	NC_005956	348725	349528	+2	TTG	801	0	BH_RS01315	BH02640	BH02640	348725..349528(+)	NC_005956_02790	ORF_348803..349528_241aa_+2	n to n	BHPROD|MQB277_369727_370530_+1_TTG_267	267	Cytoplasmic	0		CYT	G3DSA:3.40.190.80,G3DSA:3.30.540.10	PTHR20854	PF00459;Inositol monophosphatase family	-	PR00377;Inositol monophosphatase superfamily signature	PS00630;Inositol monophosphatase family signature 2.,PS00629;Inositol monophosphatase family signature 1.	-	-	-	SSF56655	-	-	Inositol monophosphatase	aproNOG	G	1	11	80	-0.932231	0.520685	1377.84	1915.94	2795.85	3.25199	0.00412041	7.1177	1.70327
BH_RS01320|rso|ens|geno|prod|NC_005956_349574_349819_+2_ATG_81	NC_005956	349574	349819	+2	ATG	243	0	BH_RS01320	BH02650	BH02650		NC_005956_02800	ORF_349562..349819_85aa_+2	n to n	BHPROD|MQB277_370576_370821_+1_ATG_81	81	Unknown	0		CYT	-	-	PF13773;Domain of unknown function (DUF4170)	-	-	-	-	-	-	-	-	-	Inositol monophosphatase family protein	aproNOG	S	1	17	305	0.0953357	0.907825	1688.43	2508.54	3449.24	0	10	5.02635	4.91764	Cyt predominant
BH_RS01325|geno|NC_005956_349924_350190_+1_GTG_88	NC_005956	349924	350190	+1	GTG	264	1	BH_RS01325		BARHE0314			ORF_349975..350190_71aa_+1	0 to n		88	CytoplasmicMembrane	0		CYT	-	-	-	-	-	-	-	-	-	-	-	-	Domain of unknown function (DUF374)	aproNOG	S	0	0	0	NA	NA	2253.23	1999.07	4718.38
BH_RS01330|rso|ens|geno|chemg|prod|NC_005956_350643_351965_+3_ATG_440	NC_005956	350643	351965	+3	ATG	1320	0	BH_RS01330	BH02660	BH02660	350643..351965(+)	NC_005956_02810	ORF_350643..351965_440aa_+3	n to n	BHPROD|MQB277_371645_372967_+2_ATG_440	440	Cytoplasmic	2		CYT	-	PTHR23417,PTHR23417:SF2	PF04413;3-Deoxy-D-manno-octulosonic-acid transferase (kdotransferase)	-	-	-	-	-	-	SSF53756	-	TMhelix;Region of a membrane-bound protein predicted to be embedded in the membrane.	3-Deoxy-D-manno-octulosonic-acid transferase	aproNOG	M	1	32	299	-0.504827	0.517806	524.014	856.871	1016.32	10	0	7.30537	1.30817	IM predominant
BH_RS01335|rso|ens|geno|chemg|prod|NC_005956_351955_352974_+1_ATG_339	NC_005956	351955	352974	+1	ATG	1017	0	BH_RS01335	BH02670	BH02670	351955..352974(+)	NC_005956_02820	ORF_351955..352974_339aa_+1	n to n	BHPROD|MQB277_372957_373976_+3_ATG_339	339	Cytoplasmic	1		TMH	-	PTHR30160,PTHR30160:SF0	PF02606;Tetraacyldisaccharide-1-P 4'-kinase	-	-	-	-	-	-	SSF52540	TIGR00682;lpxK: tetraacyldisaccharide 4'-kinase	-	Transfers the gamma-phosphate of ATP to the 4'-position of a tetraacyldisaccharide 1-phosphate intermediate (termed DS-1- P) to form tetraacyldisaccharide 1,4'-bis-phosphate (lipid IVA) (By similarity)	aproNOG	M	1	20	155	-0.519743	0.617321	1039.56	1329.74	2517.74	9.98482	4.65661e-09	8.58785	1.10085e-09	IM predominant
BH_RS01340|rso|ens|geno|prod|NC_005956_353255_353019_-3_ATG_78	NC_005956	353019	353255	-3	ATG	234	0	BH_RS01340	BH02680	BH02680		NC_005956_02830	ORF_353019..353255_78aa_-3	n to n	BHPROD|MQB277_374257_374021_-3_ATG_78	78	Unknown	0		CYT	-	-	PF09866;Uncharacterized protein conserved in bacteria (DUF2093)	-	-	-	-	-	-	-	-	-	Uncharacterized protein conserved in bacteria (DUF2093)	aproNOG	S	1	8	54	0.359403	0.848583	343.322	303.974	765.93	0.0152949	4.22509	7.34	0	IM exclusive
BH_RS01345|rso|ens|geno|chemg|prod|NC_005956_355214_353376_-3_ATG_612	NC_005956	353376	355214	-3	ATG	1836	0	BH_RS01345	BH02690	BH02690	353376..355214(-)	NC_005956_02840	ORF_353376..355214_612aa_-3	n to n	BHPROD|MQB277_376216_374378_-3_ATG_612	612	Cytoplasmic	0		CYT	G3DSA:3.30.230.10,G3DSA:3.30.565.10	PTHR10073,PTHR10073:SF12	PF08676;MutL C terminal dimerisation domain,PF02518;Histidine kinase-, DNA gyrase B-, and HSP90-like ATPase,PF01119;DNA mismatch repair protein, C-terminal domain	-	-	PS00058;DNA mismatch repair proteins mutL / hexB / PMS1 signature.	-	-	SM00853;MutL C terminal dimerisation domain	SSF118116,SSF55874,SSF54211	TIGR00585;mutl: DNA mismatch repair protein MutL	-	This protein is involved in the repair of mismatches in DNA. It is required for dam-dependent methyl-directed DNA mismatch repair. May act as a molecular matchmaker , a protein that promotes the formation of a stable complex between two or more DNA-binding proteins in an ATP-dependent manner without itself being part of a final effector complex (By similarity)	aproNOG	L	1	53	787	-0.446549	0.432519	383.656	497.309	878.878	10	0	10	1.41125e-08	IM predominant
BHCHEMG|NC_005956_354643_355017_+1_CTG_124	NC_005956	354643	355017	+1	CTG	372	0				354643..355017(+)		ORF_354712..355017_101aa_+1			124	Unknown	2		CYT	-	-	-	-	-	-	-	-	-	-	-	TMhelix;Region of a membrane-bound protein predicted to be embedded in the membrane.				0	0	0	NA	NA	0	0	0
BH_RS01350|rso|ens|geno|chemg|prod|NC_005956_355512_356600_+3_ATG_362	NC_005956	355512	356600	+3	ATG	1086	0	BH_RS01350	BH02700	BH02700	355512..356600(+)	NC_005956_02850	ORF_355512..356600_362aa_+3	n to n		362	Cytoplasmic	0		CYT	G3DSA:2.70.40.10	-	PF06559;2'-deoxycytidine 5'-triphosphate deaminase (DCD)	-	-	-	-	-	-	SSF51283	-	-	2''-deoxycytidine 5''-triphosphate deaminase	aproNOG	F	1	21	114	-0.0975829	0.951141	129.541	178.355	292.105	2.11832e-06	6.4185	9.90872	0	Cyt predominant
BHGENO0320|NC_005956_357205_357381_+1_GTG_58	NC_005956	357205	357381	+1	GTG	174	1			BARHE0320			ORF_357298..357381_27aa_+1			58	Unknown	1		CYT	-	-	-	-	-	-	-	-	-	-	-	TMhelix;Region of a membrane-bound protein predicted to be embedded in the membrane.				0	0	0	NA	NA	103.121	159.324	199.627
BH_RS01355|rso|ens|geno|+4aa_chemg|prod|NC_005956_357436_358587_+1_ATG_383	NC_005956	357436	358587	+1	ATG	1149	1	BH_RS01355	BH02710	BH02710	357424..358587(+)	NC_005956_02860	ORF_357424..358587_387aa_+1	n to n	BHPROD|MQB277_378438_379589_+3_ATG_383	383	Cytoplasmic	0		CYT	G3DSA:3.20.20.70	PTHR10578,PTHR10578:SF58	PF01070;FMN-dependent dehydrogenase	PIRSF000138	-	PS00557;FMN-dependent alpha-hydroxy acid dehydrogenases active site.	PS51349;FMN-dependent alpha-hydroxy acid dehydrogenase domain profile.	-	-	SSF51395	-	-	L-lactate dehydrogenase	aproNOG	C	1	43	531	-0.389292	0.541369	978.952	1017.01	2164.18	10	0	9.39212	0	IM predominant
BHPROD|NC_005956_358584_358718_+3_ATG_44	NC_005956	358584	358718	+3	ATG	132	1					NC_005956_02870	ORF_358584..358718_44aa_+3		BHPROD|MQB277_379586_379720_+2_ATG_44	44	Unknown	0		CYT	-	-	-	-	-	-	-	-	-	-	-	-				0	0	0	NA	NA	136.776	213.355	198.661
BHGENO0322|NC_005956_358894_358748_-1_TTG_48	NC_005956	358748	358894	-1	TTG	144	1			BARHE0322			ORF_358748..358852_34aa_-1			48	CytoplasmicMembrane	1		TMH	-	-	-	-	-	-	-	-	-	-	-	TMhelix;Region of a membrane-bound protein predicted to be embedded in the membrane.				0	0	0	NA	NA	36.1915	36.7098	58.6261
BHGENO0323|NC_005956_358806_358928_+3_TTG_40	NC_005956	358806	358928	+3	TTG	120	1			BARHE0323			ORF_358806..358928_40aa_+3			40	Unknown	0		CYT	-	-	-	-	-	-	-	-	-	-	-	-				0	0	0	NA	NA	14.2287	0	17.9592
BHRSO02730|ens|geno|prod|NC_005956_360289_360414_+1_ATG_41	NC_005956	360289	360414	+1	ATG	123	1		BH02730	BH02730		NC_005956_02890	ORF_360289..360414_41aa_+1	n to 0	BHPROD|MQB277_381291_381416_+3_ATG_41	41	Unknown	0		CYT	-	-	-	-	-	-	-	-	-	-	-	-	SlyX	aproNOG	S	0	0	0	NA	NA	42.3516	27.3319	78.5271
BHORF|NC_005956_360567_360484_-2_TTG_27	NC_005956	360484	360567	-2	TTG	81	1						ORF_360484..360567_27aa_-2			27	Unknown	0		CYT	-	-	-	-	-	-	-	-	-	-	-	-				0	1	1	NA	NA	51.9362	47.0204	101.224
BHCHEMG|NC_005956_360627_360800_+3_ATG_57	NC_005956	360627	360800	+3	ATG	171	1				360627..360800(+)		ORF_360627..360800_57aa_+3			57	Unknown	1		CYT	-	-	-	-	-	-	-	-	-	-	-	TMhelix;Region of a membrane-bound protein predicted to be embedded in the membrane.				0	0	0	NA	NA	40.4917	35.5403	97.1686
BHCHEMG|NC_005956_361189_361013_-1_TTG_58	NC_005956	361013	361189	-1	TTG	174	1				361013..361189(-)		ORF_361013..361162_49aa_-1			58	Unknown	0		CYT	-	-	-	-	-	-	-	-	-	-	-	-				0	0	0	NA	NA	40.4436	59.4577	103.329
BHRSO02740|ens|geno|chemg|prod|NC_005956_361395_361075_-2_ATG_106	NC_005956	361075	361395	-2	ATG	318	1		BH02740	BH02740	361075..361395(-)	NC_005956_02900	ORF_361075..361395_106aa_-2	n to 0	BHPROD|MQB277_382397_382077_-2_ATG_106	106	CytoplasmicMembrane	1	yes	TMH	-	-	-	-	-	-	-	-	-	-	-	TMhelix;Region of a membrane-bound protein predicted to be embedded in the membrane.	NA	aproNOG	S	0	0	0	NA	NA	142.998	172.527	375.238
BH_RS01365|rso|ens|geno|chemg|prod|NC_005956_361576_363003_+1_GTG_475	NC_005956	361576	363003	+1	GTG	1425	1	BH_RS01365	BH02750	BH02750	361576..363003(+)	NC_005956_02910	ORF_361633..363003_456aa_+1	n to n	BHPROD|MQB277_382578_384005_+3_GTG_475	475	CytoplasmicMembrane	12		TMH	-	PTHR11785,PTHR11785:SF26	PF00324;Amino acid permease	PIRSF006060	-	PS00218;Amino acid permeases signature.	-	-	-	-	-	TMhelix;Region of a membrane-bound protein predicted to be embedded in the membrane.	permease	aproNOG	E	1	5	32	-0.466568	0.869662	1857.31	2602.02	3878.12	6.83594	0	5.9443	0.000469374	TM exclusive
BH_RS01370|rso|ens|geno|chemg|prod|NC_005956_363045_363725_+3_TTG_226	NC_005956	363045	363725	+3	TTG	678	0	BH_RS01370	BH02760	BH02760	363045..363725(+)	NC_005956_02920	ORF_363495..363725_76aa_+3	n to n	BHPROD|MQB277_384047_384727_+2_TTG_226	226	CytoplasmicMembrane	0		CYT	G3DSA:3.40.50.300	PTHR24220	PF00005;ABC transporter	-	-	PS00211;ABC transporters family signature.	PS50893;ATP-binding cassette, ABC transporter-type domain profile.	-	SM00382;ATPases associated with a variety of cellular activities	SSF52540	-	-	abc transporter atp-binding protein	aproNOG	P	1	16	165	-0.776953	0.440266	1713.43	2198.2	4247.17	10	0	9.94014	0	IM exclusive
BHGENO0328|NC_005956_363799_363918_+1_GTG_39	NC_005956	363799	363918	+1	GTG	117	1			BARHE0328			ORF_363799..363918_39aa_+1			39	Unknown	0		CYT	-	-	-	-	-	-	-	-	-	-	-	TMhelix;Region of a membrane-bound protein predicted to be embedded in the membrane.				0	0	0	NA	NA	0	0	0
BH_RS01375|rso|ens|geno|chemg|prod|NC_005956_363722_364360_+2_ATG_212	NC_005956	363722	364360	+2	ATG	636	0	BH_RS01375	BH02770	BH02770	363722..364360(+)	NC_005956_02930	ORF_363722..364360_212aa_+2	n to n	BHPROD|MQB277_384724_385362_+1_ATG_212	212	CytoplasmicMembrane	2		TMH	-	-	PF02361;Cobalt transport protein	-	-	-	-	-	-	-	-	TMhelix;Region of a membrane-bound protein predicted to be embedded in the membrane.	cobalt transport protein	aproNOG	P	1	7	41	-0.8067	0.711794	262.468	169.879	790.021	2.61719	0.625	5.9408	0.00175204
BH_RS01380|rso|ens|geno|chemg|prod|NC_005956_364374_364928_+3_ATG_184	NC_005956	364374	364928	+3	ATG	552	1	BH_RS01380	BH02780	BH02780	364374..364928(+)	NC_005956_02940	ORF_364374..364928_184aa_+3	n to n	BHPROD|MQB277_385376_385930_+2_ATG_184	184	CytoplasmicMembrane	5		TMH	-	-	PF02632;BioY family	PIRSF016661	-	-	-	-	-	-	-	TMhelix;Region of a membrane-bound protein predicted to be embedded in the membrane.	BioY protein	aproNOG	S	1	11	151	-0.769749	0.463199	484.084	321.4	1552.3	2.84856	0.0111072	5.47264	2.6573
BH_RS01385|geno|prod|NC_005956_365498_365740_+2_ATG_80	NC_005956	365498	365740	+2	ATG	240	1	BH_RS01385		BARHE0331		NC_005956_02950	ORF_365498..365740_80aa_+2	0 to n	BHPROD|MQB277_386500_386742_+1_ATG_80	80	Unknown	0	yes	SpI	-	-	-	-	-	-	PS51257;Prokaryotic membrane lipoprotein lipid attachment site profile.	-	-	-	-	-				1	3	5	NA	NA	84.7716	76.9639	130.814	2.5	0	3.7995	0	IM exclusive
BHGENO0332|chemg|NC_005956_366419_366222_-3_TTG_65	NC_005956	366222	366419	-3	TTG	195	1		BH02790(p)	BARHE0332	366222..366419(-)		ORF_366222..366308_28aa_-3	p to 0		65	Unknown	0		CYT	G3DSA:3.90.320.10	-	-	-	-	-	-	-	-	-	-	-	exonuclease	aproNOG	L	0	0	0	NA	NA	8.39492	11.7597	19.7662
BHGENO0333_fCDS_p|NC_005956_367040_366873_-3_TTG_55	NC_005956	366873	367040	-3	TTG	165	1			BARHE0333(p)			ORF_366873..367019_48aa_-3			55	Unknown	0		CYT	-	-	-	-	-	-	-	-	-	-	-	-	recombination protein	proNOG	L	0	0	0	NA	NA	116.671	77.0132	324.216
BHGENO0334_fCDS_p|NC_005956_367173_367030_-2_ATG_47	NC_005956	367030	367173	-2	ATG	141	1			BARHE0334(p)			ORF_367030..367173_47aa_-2			47	Unknown	0		CYT	-	-	-	-	-	-	-	-	-	-	-	-				0	0	0	NA	NA	46.8554	53.1592	92.6694
BHGENO0335_fCDS_p|NC_005956_367252_367121_-1_GTG_43	NC_005956	367121	367252	-1	GTG	129	1			BARHE0335(p)			ORF_367121..367252_43aa_-1			43	Unknown	0		CYT	-	-	-	-	-	-	-	-	-	-	-	-	recombination protein	proNOG	L	0	0	0	NA	NA	27.3613	7.40816	71.3878
BH_RS01395|NC_005956_367482_367249_-2_ATG_77	NC_005956	367249	367482	-2	ATG	231	1	BH_RS01395	BH02800(p)	BH02800(p)			ORF_367249..367482_77aa_-2	p to n		77	Unknown	0		CYT	-	-	-	-	-	-	-	-	-	-	-	-				0	0	0	NA	NA	194.814	259.452	369.446
BHGENO0336|prod|NC_005956_367890_368012_+3_ATG_40	NC_005956	367890	368012	+3	ATG	120	1			BARHE0336		NC_005956_02960	ORF_367890..368012_40aa_+3		BHPROD|MQB277_388892_389014_+2_ATG_40	40	Unknown	0		CYT	-	-	-	-	-	-	-	-	-	-	-	-				0	0	0	NA	NA	216.381	224.106	359.587
BHPROD|NC_005956_368545_368634_+1_ATG_29	NC_005956	368545	368634	+1	ATG	87	1		BH02810(p)	BH02810(p)		NC_005956_02970	ORF_368545..368634_29aa_+1	p to 0	BHPROD|MQB277_389547_389636_+3_ATG_29	29	Unknown	0		CYT	-	-	-	-	-	-	-	-	-	-	-	-				0	0	0	NA	NA	116.022	72.7347	291.837
BHGENO0337|NC_005956_368675_368749_+2_CTG_24	NC_005956	368675	368749	+2	CTG	72	1		BH02820(p)	BARHE0337			ORF_368675..368749_24aa_+2	p to 0		24	Unknown	0		CYT	-	-	-	-	-	-	-	-	-	-	-	-	Inherit from proNOG: acetyltransferase YdcK	aproNOG	S	0	0	0	NA	NA	18.3153	9.48245	47.4122
BH_RS01400|geno|prod|NC_005956_368964_369407_+3_ATG_147	NC_005956	368964	369407	+3	ATG	441	1	BH_RS01400		BARHE0338		NC_005956_02980	ORF_368964..369407_147aa_+3	0 to n	BHPROD|MQB277_389966_390409_+2_ATG_147	147	Unknown	0		CYT	-	-	-	-	-	-	-	-	-	-	-	-				0	0	0	NA	NA	15.9411	5.5792	41.5158
BHGENO0339|NC_005956_369266_369421_+2_GTG_51	NC_005956	369266	369421	+2	GTG	153	6			BARHE0339			ORF_369293..369421_42aa_+2			51	Unknown	0		CYT	-	-	-	-	-	-	-	-	-	-	-	-				0	0	0	NA	NA	0	0	0
BHGENOBH02830_fCDS1_p|chemg|prod|NC_005956_369436_369621_+1_ATG_61	NC_005956	369436	369621	+1	ATG	183	1	BH_RS01405(p)	BH02830(p)	BH02830(p)	369436..369621(+)	NC_005956_02990	ORF_369436..369621_61aa_+1	p to p	BH_RS01405_p|-199aa_geno_fCDS3_p|NC_005956_369436_370100_+1_ATG_221,BHPROD|MQB277_390438_390623_+3_ATG_61	61	Unknown	0		CYT	G3DSA:1.10.530.40	-	PF00959;Phage lysozyme	-	-	-	-	-	-	SSF53955	-	-	lysozyme	aproNOG	S	0	0	0	NA	NA	0	0	0
BHGENOBH02830-2_fCDS2_p|chemg|prod|NC_005956_369612_369947_+3_ATG_111	NC_005956	369612	369947	+3	ATG	333	1	BH_RS01405(p)	BH02830(p)	BH02830-2(p)	369612..369947(+)	NC_005956_03000	ORF_369612..369947_111aa_+3	p to p	BHPROD|MQB277_390614_390949_+2_ATG_111	111	Unknown	0		CYT	G3DSA:1.10.530.40	-	-	-	-	-	-	-	-	SSF53955	-	-	lysozyme	aproNOG	S	0	0	0	NA	NA	0	0	0
BH_RS01405_p|-199aa_geno_fCDS3_p|NC_005956_369436_370100_+1_ATG_221	NC_005956	369436	370100	+1	ATG	662	1	BH_RS01405(p)	BH02830(p)	BH02830-3(p)			ORF_370035..370100_21aa_+3	p to p	BHGENOBH02830_fCDS1_p|chemg|prod|NC_005956_369436_369621_+1_ATG_61,BHPROD|MQB277_390438_390623_+3_ATG_61	221	Unknown	0		CYT	G3DSA:1.10.530.40	-	-	-	-	-	-	-	-	SSF53955	-	-	lysozyme	aproNOG	S	0	0	0	NA	NA	6.79783	7.02751	23.1908
BH_RS01410|-9aa_geno|+2aa_chemg|prod|NC_005956_370097_370324_+2_ATG_75	NC_005956	370097	370324	+2	ATG	225	1	BH_RS01410		BARHE0342	370091..370324(+)	NC_005956_03010	ORF_370097..370324_75aa_+2	0 to n	BHPROD|MQB277_391099_391326_+1_ATG_75	75	Unknown	0	yes	SpI	-	-	-	-	-	-	-	-	-	-	-	TMhelix;Region of a membrane-bound protein predicted to be embedded in the membrane.				0	0	0	NA	NA	3.08555	0.99979	4.33242
BHRSO02840|ens|geno|+6aa_chemg|NC_005956_370293_370475_+3_TTG_60	NC_005956	370293	370475	+3	TTG	180	1		BH02840	BH02840	370275..370475(+)		ORF_370257..370475_72aa_+3	n to 0		60	Unknown	0		CYT	-	-	-	-	-	-	-	-	-	-	-	-	NA	proNOG	S	0	0	0	NA	NA	3.02613	2.08558	5.21396
BH_RS01420|-22aa_rso|+4aa_chemg|prod|NC_005956_370456_370674_+1_ATG_72	NC_005956	370456	370674	+1	ATG	216	1	BH_RS01420	BH02850	BH02850	370444..370674(+)	NC_005956_03020	ORF_370456..370674_72aa_+1	n to n	BHPROD|MQB277_391458_391676_+3_ATG_72	72	Unknown	0	yes	CYT	-	-	-	-	-	-	-	-	-	-	-	TMhelix;Region of a membrane-bound protein predicted to be embedded in the membrane.				0	0	0	NA	NA	36.5333	59.212	63.0527
BHRSO02860|ens|geno|chemg|prod|NC_005956_370808_371101_+2_ATG_97	NC_005956	370808	371101	+2	ATG	291	0	BH_RS01425(p)	BH02860	BH02860	370808..371101(+)	NC_005956_03030	ORF_370808..371101_97aa_+2	n+n to p	BHPROD|MQB277_391810_392103_+1_ATG_97	97	Unknown	0		CYT	G3DSA:1.10.260.40	-	-	-	-	-	-	-	-	SSF47413	-	-	Metallopeptidase	proNOG	K	0	0	0	NA	NA	92.9979	29.9755	167.51
BH_RS01425_p_-71aa_rso|ens|geno|NC_005956_371023_371178_+1_CTG_51	NC_005956	371023	371178	+1	CTG	153	1	BH_RS01425(p)	BH02870	BH02870			ORF_371083..371178_31aa_+1	n+n to p		51	Unknown	0		CYT	-	-	-	-	-	-	-	-	-	-	-	-	Inherit from proNOG: Metallopeptidase	aproNOG	K	0	0	0	NA	NA	12.0655	10.5741	17.2207
BHCHEMG|NC_005956_371993_371694_-3_ATG_99	NC_005956	371694	371993	-3	ATG	297	0				371694..371993(-)		ORF_371694..371993_99aa_-3			99	Unknown	1		CYT	-	-	-	-	-	-	-	-	-	-	-	-				0	0	0	NA	NA	0	0	0
BH_RS01430|rso|ens|geno|chemg|prod|NC_005956_371485_372642_+1_GTG_385	NC_005956	371485	372642	+1	GTG	1155	0	BH_RS01430	BH02880	BH02880	371485..372642(+)	NC_005956_03040	ORF_371635..372642_335aa_+1	n to n	BHPROD|MQB277_392487_393644_+3_GTG_385	385	Unknown	0		CYT	G3DSA:1.10.443.10	PTHR30629:SF0,PTHR30629	PF13356;Domain of unknown function (DUF4102),PF00589;Phage integrase family	-	-	-	-	-	-	SSF56349	-	-	Integrase	aproNOG	L	1	13	53	-2.02554	0.285529	356.856	462.518	701.859	9.92483	0	2.66828	1.62722	TM exclusive
BHRSO02890|ens|geno|chemg|prod|NC_005956_372656_372886_+2_ATG_76	NC_005956	372656	372886	+2	ATG	228	1		BH02890	BH02890	372656..372886(+)	NC_005956_03050	ORF_372656..372886_76aa_+2	n to 0	BHPROD|MQB277_393658_393888_+1_ATG_76	76	Unknown	0		CYT	-	-	-	-	-	-	-	-	-	-	-	-				0	0	0	NA	NA	207.227	91.7531	452.765
BH_RS01435|rso|ens|geno|chemg|prod|NC_005956_372914_373504_+2_ATG_196	NC_005956	372914	373504	+2	ATG	588	1	BH_RS01435	BH02900	BH02900	372914..373504(+)	NC_005956_03060	ORF_372914..373504_196aa_+2	n to n	BHPROD|MQB277_393916_394506_+1_ATG_196	196	Cytoplasmic	0		CYT	-	-	PF08346;AntA/AntB antirepressor	-	-	-	-	-	-	-	-	-	anti-repressor protein	aproNOG	K	0	0	0	NA	NA	684.512	412.727	1659.93
BH_RS01440|rso|ens|geno|chemg|prod|NC_005956_373624_373899_+1_ATG_91	NC_005956	373624	373899	+1	ATG	273	1	BH_RS01440	BH02910	BH02910	373624..373899(+)	NC_005956_03070	ORF_373624..373899_91aa_+1	n to n	BHPROD|MQB277_394626_394901_+3_ATG_91	91	Cytoplasmic	0		CYT	-	-	PF04221;RelB antitoxin	PIRSF003108	-	-	-	-	-	-	TIGR02384;RelB_DinJ: addiction module antitoxin, RelB/DinJ family	-	DNA-damage-inducible protein	aproNOG	L	1	16	203	-0.555056	0.545114	590.225	648.378	1518.61	0	10	4.36586	4.22634	Cyt predominant
BH_RS01445|rso|ens|geno|chemg|prod|NC_005956_373912_374202_+1_ATG_96	NC_005956	373912	374202	+1	ATG	288	1	BH_RS01445	BH02920	BH02920	373912..374202(+)	NC_005956_03080	ORF_373912..374202_96aa_+1	n to n	BHPROD|MQB277_394914_395204_+3_ATG_96	96	Cytoplasmic	0		CYT	-	-	PF05016;Plasmid stabilisation system protein	PIRSF006156	-	-	-	-	-	SSF143011	TIGR02385;RelE_StbE: addiction module toxin, RelE/StbE family	-	addiction module toxin, RelE StbE family	aproNOG	S	1	9	64	-0.270648	0.883937	786.851	855.845	1782.81	5.57776e-13	9.99641	5.52487	0.0692064	Cyt predominant
BH_RS01450|+6aa_rso|NC_005956_374537_374325_-3_ATG_70	NC_005956	374325	374537	-3	ATG	210	1	BH_RS01450	BH02930	BH02930	374325..374555(-)	NC_005956_03090	ORF_374325..374537_70aa_-3	n to n	BHPROD|MQB277_395557_395327_-3_GTG_76	70	Unknown	1		CYT	-	-	-	-	-	-	-	-	-	-	-	TMhelix;Region of a membrane-bound protein predicted to be embedded in the membrane.	NA	aproNOG	S	0	0	0	NA	NA	64.562	30.6251	108.209
BHCHEMG|NC_005956_374733_374530_-2_ATG_67	NC_005956	374530	374733	-2	ATG	201	1				374530..374733(-)		ORF_374530..374733_67aa_-2			67	Unknown	0	yes	SpII	-	-	-	-	-	-	PS51257;Prokaryotic membrane lipoprotein lipid attachment site profile.	-	-	-	-	-	NA	proNOG	S	0	0	0	NA	NA	1.48556	1.43842	4.84519
BH_RS01460|rso|ens|geno|prod|NC_005956_374893_374666_-1_ATG_75	NC_005956	374666	374893	-1	ATG	225	1	BH_RS01460	BH02940	BH02940		NC_005956_03100	ORF_374666..374893_75aa_-1	n to n	BHPROD|MQB277_395895_395668_-1_ATG_75	75	Unknown	0	yes	SpI	-	-	-	-	-	-	-	SignalP-noTM	-	-	-	TMhelix;Region of a membrane-bound protein predicted to be embedded in the membrane.				0	1	1	NA	NA	6.95844	2.48666	6.21664
BH_RS01465|rso|ens|geno_fCDS_p|+22aa_chemg|prod|NC_005956_375552_374890_-2_ATG_220	NC_005956	374890	375552	-2	ATG	660	1	BH_RS01465	BH02950	BH02950(p)	374890..375618(-)	NC_005956_03110	ORF_374890..375618_242aa_-2	n to n	BHPROD|MQB277_396554_395892_-2_ATG_220	220	Unknown	2		CYT	G3DSA:1.10.530.40	-	PF00959;Phage lysozyme	-	-	-	-	-	-	SSF53955	-	TMhelix;Region of a membrane-bound protein predicted to be embedded in the membrane.	lysozyme	aproNOG	S	0	1	1	NA	NA	84.3546	92.9388	151.665
BH_RS01470|rso|ens|geno|+18aa_chemg|prod|NC_005956_375712_376014_+1_ATG_100	NC_005956	375712	376014	+1	ATG	300	0	BH_RS01470	BH02960	BH02960	375658..376014(+)	NC_005956_03120	ORF_375712..376014_100aa_+1	n to n	BHPROD|MQB277_396714_397016_+3_ATG_100	100	Cytoplasmic	0		CYT	-	-	PF05973;Phage derived protein Gp49-like (DUF891)	PIRSF028744	-	-	-	-	-	-	TIGR02683;upstrm_HI1419: putative addiction module killer protein	-	addiction module killer protein	aproNOG	S	1	6	17	-0.0482552	1	2319.49	908.606	4904.4	0.15625	5	4.71176	0	Cyt predominant
BH_RS01475|rso|ens|geno|chemg|prod|NC_005956_376001_376321_+2_ATG_106	NC_005956	376001	376321	+2	ATG	318	0	BH_RS01475	BH02970	BH02970	376001..376321(+)	NC_005956_03130	ORF_376001..376321_106aa_+2	n to n	BHPROD|MQB277_397003_397323_+1_ATG_106	106	Unknown	0		CYT	G3DSA:1.10.260.40	-	-	-	-	-	-	-	-	SSF47413	TIGR02684;dnstrm_HI1420: probable addiction module antidote protein	-	addiction module antidote protein	aproNOG	K	1	18	219	-0.387831	0.664031	2674.5	1014.1	5399.13	1.77636e-14	9.5751	5.17751	3.28073	Cyt predominant
BH_RS01480|rso|ens|geno|+38aa_chemg|prod|NC_005956_376643_376365_-3_ATG_92	NC_005956	376365	376643	-3	ATG	276	1	BH_RS01480	BH02980	BH02980	376365..376757(-)	NC_005956_03140	ORF_376365..376643_92aa_-3	n to n	BH_RS01680|rso|ens|geno|+38aa_chemg|prod|NC_005956_408661_408383_-1_ATG_92,BHPROD|MQB277_397645_397367_-3_ATG_92,BHPROD|MQB277_429663_429385_-1_ATG_92	92	Unknown	0		CYT	-	-	-	-	-	-	-	-	-	-	-	-				1	2	3	NA	NA	71.3716	53.1344	196.56
BH_RS01485|rso|ens|geno|+1aa_chemg|prod|NC_005956_377371_376640_-1_ATG_243	NC_005956	376640	377371	-1	ATG	729	1	BH_RS01485	BH02990	BH02990	376640..377374(-)	NC_005956_03150	ORF_376640..377374_244aa_-1	n to n	BHPROD|MQB277_398373_397642_-1_ATG_243	243	Cytoplasmic	0		CYT	-	-	PF03374;Phage antirepressor protein KilAC domain,PF08346;AntA/AntB antirepressor	-	-	-	-	-	-	-	-	-	Anti-repressor protein	aproNOG	K	0	0	0	NA	NA	455.947	240.833	1261.27
BHGENOBH03000_p|chemg|NC_005956_377609_377388_-3_GTG_73	NC_005956	377388	377609	-3	GTG	219	1		BH03000(p)	BH03000(p)	377388..377609(-)		ORF_377388..377525_45aa_-3	p to 0		73	Unknown	0		CYT	-	-	-	-	-	-	-	-	-	-	-	-				0	0	0	NA	NA	1089.75	826.399	3317.2
BH_RS01490|rso|ens|geno|chemg|prod|NC_005956_378195_377623_-2_ATG_190	NC_005956	377623	378195	-2	ATG	570	1	BH_RS01490	BH03010	BH03010	377623..378195(-)	NC_005956_03160	ORF_377623..378195_190aa_-2	n to n	BHPROD|MQB277_399197_398625_-2_ATG_190	190	Cytoplasmic	0		CYT	-	-	PF08346;AntA/AntB antirepressor	-	-	-	-	-	-	-	-	-	Anti-repressor protein	aproNOG	K	0	0	0	NA	NA	73.5891	59.8385	168.511
BH_RS01495|rso|ens|geno|chemg|prod|NC_005956_378771_378223_-2_ATG_182	NC_005956	378223	378771	-2	ATG	546	1	BH_RS01495	BH03020	BH03020	378223..378771(-)	NC_005956_03170	ORF_378223..378771_182aa_-2	n to n	BHPROD|MQB277_399773_399225_-2_ATG_182	182	Unknown	0		CYT	-	-	PF08346;AntA/AntB antirepressor	-	-	-	-	-	-	-	-	-	anti-repressor protein	aproNOG	K	0	0	0	NA	NA	1014.57	288.63	3423.53
BHCHEMG|NC_005956_378566_378721_+2_ATG_51	NC_005956	378566	378721	+2	ATG	153	1				378566..378721(+)		ORF_378542..378721_59aa_+2			51	Unknown	0		CYT	-	-	-	-	-	-	-	-	-	-	-	-				0	0	0	NA	NA	0	0	0
BHGENO0361|chemg|NC_005956_378973_378830_-1_TTG_47	NC_005956	378830	378973	-1	TTG	141	1			BARHE0361	378830..378973(-)		ORF_378830..378925_31aa_-1			47	Unknown	0		CYT	-	-	-	-	-	-	-	-	-	-	-	-				0	0	0	NA	NA	1626.5	1002.12	5085.3
BHGENO0362|NC_005956_378948_379076_+3_CTG_42	NC_005956	378948	379076	+3	CTG	126	1			BARHE0362			ORF_378948..379076_42aa_+3			42	Unknown	0		CYT	-	-	-	-	-	-	-	-	-	-	-	-				0	0	0	NA	NA	41.5445	7.54286	157.322
BH_RS01500|rso|ens|geno|+5aa_chemg|prod|NC_005956_380390_379083_-3_ATG_435	NC_005956	379083	380390	-3	ATG	1305	1	BH_RS01500	BH03030	BH03030	379083..380405(-)	NC_005956_03180	ORF_379083..380390_435aa_-3	n to n	BHPROD|MQB277_401392_400085_-3_ATG_435	435	Cytoplasmic	0		CYT	-	-	PF05954;Phage late control gene D protein (GPD)	-	-	-	-	-	-	SSF69279	-	-	Phage late control gene D protein (GPD)	aproNOG	S	0	0	0	NA	NA	73.1646	46.7424	156.827
BHCHEMG|NC_005956_379582_379286_-1_CTG_98	NC_005956	379286	379582	-1	CTG	294	1				379286..379582(-)		ORF_379286..379705_139aa_-1			98	Unknown	0	yes	CYT	-	-	-	-	-	-	-	-	-	-	-	-				0	0	0	NA	NA	0	0	0
BH_RS01505|rso|ens|geno|chemg|prod|NC_005956_380611_380387_-1_ATG_74	NC_005956	380387	380611	-1	ATG	222	1	BH_RS01505	BH03040	BH03040	380387..380611(-)	NC_005956_03190	ORF_380387..380611_74aa_-1	n to n	BHPROD|MQB277_401613_401389_-1_ATG_74	74	Unknown	0		CYT	-	-	PF05489;Phage Tail Protein X	-	-	-	-	-	-	-	-	-	tail protein	aproNOG	S	0	1	1	NA	NA	6.16353	2.86438	16.3679
BH_RS01510|rso|ens|geno|chemg|prod|NC_005956_380988_380608_-2_ATG_126	NC_005956	380608	380988	-2	ATG	378	1	BH_RS01510	BH03050	BH03050	380608..380988(-)	NC_005956_03200	ORF_380608..380988_126aa_-2	n to n	BHPROD|MQB277_401990_401610_-2_ATG_126	126	Unknown	0	yes	CYT	-	-	PF06995;Phage P2 GpU	-	-	-	-	-	-	-	-	-	tail protein	aproNOG	S	0	0	0	NA	NA	5.77751	0.43102	28.0163
BH_RS01515|rso|ens|geno|chemg|prod|NC_005956_383294_380994_-3_ATG_766	NC_005956	380994	383294	-3	ATG	2298	1	BH_RS01515	BH03060	BH03060	380994..383294(-)	NC_005956_03210	ORF_380994..383294_766aa_-3	n to n	BHPROD|MQB277_404296_401996_-3_ATG_766	766	CytoplasmicMembrane	7		CYT	-	-	-	-	-	-	-	-	-	-	-	TMhelix;Region of a membrane-bound protein predicted to be embedded in the membrane.	tape measure protein	aproNOG	S	0	0	0	NA	NA	99.2014	74.1281	208.45
BHCHEMG|NC_005956_381160_381684_+1_ATG_174	NC_005956	381160	381684	+1	ATG	522	1				381160..381684(+)		ORF_381160..381684_174aa_+1			174	Unknown	1	yes	TMH	-	-	-	-	-	-	-	-	-	-	-	TMhelix;Region of a membrane-bound protein predicted to be embedded in the membrane.				0	0	0	NA	NA	0	0	0
BHCHEMG|NC_005956_381742_382101_+1_GTG_119	NC_005956	381742	382101	+1	GTG	357	1				381742..382101(+)		ORF_381748..382101_117aa_+1			119	Unknown	0		CYT	-	-	-	-	-	-	-	-	-	-	-	-				0	0	0	NA	NA	0	0	0
BHCHEMG|NC_005956_382141_382425_+1_ATG_94	NC_005956	382141	382425	+1	ATG	282	1				382141..382425(+)		ORF_382141..382425_94aa_+1			94	Unknown	0		CYT	-	-	-	-	-	-	-	-	-	-	-	-				0	0	0	NA	NA	0	0	0
BHCHEMG|NC_005956_383525_383301_-3_CTG_74	NC_005956	383301	383525	-3	CTG	222	1				383301..383525(-)		ORF_383301..383513_70aa_-3			74	Unknown	0		CYT	-	-	-	-	-	-	-	-	-	-	-	-				0	0	0	NA	NA	1.34014	0.202041	6.46531
BH_RS01520|rso|ens|geno|chemg|prod|NC_005956_383688_383404_-2_ATG_94	NC_005956	383404	383688	-2	ATG	282	1	BH_RS01520	BH03070	BH03070	383404..383688(-)	NC_005956_03220	ORF_383404..383688_94aa_-2	n to n	BHPROD|MQB277_404690_404406_-2_ATG_94	94	Unknown	0		CYT	-	-	PF10109;Mu-like prophage FluMu protein gp41	-	-	-	-	-	-	-	-	-	NA	aproNOG	S	1	4	6	NA	NA	8.4434	8.88091	18.1171	0	9.375	0	0	Cyt exclusive
BH_RS01525|rso|ens|geno|chemg|prod|NC_005956_384196_383690_-1_ATG_168	NC_005956	383690	384196	-1	ATG	504	1	BH_RS01525	BH03080	BH03080	383690..384196(-)	NC_005956_03230	ORF_383690..384196_168aa_-1	n to n	BHPROD|MQB277_405198_404692_-1_ATG_168	168	Cytoplasmic	0		CYT	-	-	PF04985;Phage tail tube protein FII	-	-	-	-	-	-	-	TIGR01611;tail_tube: phage major tail tube protein	-	tail tube protein	aproNOG	S	1	6	19	-0.649159	0.877885	16.4779	20.1278	47.2699	9.43686	0	3.63584	0.980016	TM exclusive
BH_RS01530|rso|ens|geno|chemg|prod|NC_005956_385428_384196_-2_ATG_410	NC_005956	384196	385428	-2	ATG	1230	1	BH_RS01530	BH03090	BH03090	384196..385428(-)	NC_005956_03240	ORF_384196..385428_410aa_-2	n to n	BHPROD|MQB277_406430_405198_-2_ATG_410	410	Cytoplasmic	0		CYT	-	-	PF04984;Phage tail sheath protein	-	-	-	-	-	-	-	-	-	tail sheath protein	aproNOG	S	1	10	35	-1.0642	0.657363	63.087	44.2016	219.029	9.82182	0	7.24707	0.386926	TM exclusive
BHORF|NC_005956_384550_384473_-1_CTG_25	NC_005956	384473	384550	-1	CTG	75	1						ORF_384473..384550_25aa_-1		BHORF|MQB277_405552_405475_-1_CTG_25	25	Unknown	0		CYT	-	-	-	-	-	-	-	-	-	-	-	-				0	1	7	NA	NA	0	0	0
BHCHEMG|NC_005956_384668_384480_-3_ATG_62	NC_005956	384480	384668	-3	ATG	186	1				384480..384668(-)		ORF_384480..384668_62aa_-3			62	Unknown	0		CYT	-	-	-	-	-	-	-	-	-	-	-	-				0	0	0	NA	NA	0	0	0
BHCHEMG|NC_005956_384404_384559_+2_CTG_51	NC_005956	384404	384559	+2	CTG	153	1				384404..384559(+)		ORF_384416..384559_47aa_+2			51	Unknown	0	yes	CYT	-	-	-	-	-	-	-	-	-	-	-	-				0	0	0	NA	NA	0	0	0
BHCHEMG|NC_005956_384575_384934_+2_ATG_119	NC_005956	384575	384934	+2	ATG	357	1				384575..384934(+)		ORF_384575..384934_119aa_+2			119	Unknown	1	yes	CYT	-	-	-	-	-	-	-	-	-	-	-	-				0	0	0	NA	NA	0	0	0
BHCHEMG|NC_005956_385190_385357_+2_TTG_55	NC_005956	385190	385357	+2	TTG	165	1				385190..385357(+)		ORF_385196..385357_53aa_+2			55	Unknown	0		CYT	-	-	-	-	-	-	-	-	-	-	-	-				0	0	0	NA	NA	0	0	0
BHCHEMG|NC_005956_385740_385901_+3_ATG_53	NC_005956	385740	385901	+3	ATG	159	1		BH03100(p)	BH03100(p)	385740..385901(+)		ORF_385740..385901_53aa_+3	p to 0		53	Unknown	0		CYT	-	-	-	-	-	-	-	-	-	-	-	-				0	0	0	NA	NA	693.104	432.491	2479.96
BH_RS01535|rso|ens|geno|chemg|prod|NC_005956_385898_386419_+2_ATG_173	NC_005956	385898	386419	+2	ATG	519	1	BH_RS01535	BH03110	BH03110	385898..386419(+)	NC_005956_03250	ORF_385898..386419_173aa_+2	n to n	BHPROD|MQB277_406900_407421_+1_ATG_173	173	Unknown	0		CYT	-	-	PF09669;Phage regulatory protein Rha (Phage_pRha)	-	-	-	-	-	-	-	-	-	Phage regulatory protein Rha (Phage_pRha)	proNOG	S	0	0	0	NA	NA	327.141	206.739	896.121
BH_RS01540|rso|ens|geno|+6aa_chemg|prod|NC_005956_386794_386465_-1_ATG_109	NC_005956	386465	386794	-1	ATG	327	1	BH_RS01540	BH03120	BH03120	386465..386812(-)	NC_005956_03260	ORF_386465..386794_109aa_-1	n to n	BHPROD|MQB277_407796_407467_-1_ATG_109	109	Unknown	0		CYT	G3DSA:1.10.260.40	-	-	-	-	-	-	-	-	SSF47413	TIGR02607;antidote_HigA: addiction module antidote protein, HigA family	-	plasmid maintenance system antidote protein	aproNOG	S	1	3	8	NA	NA	39.9173	36.6608	98.6952	2.5	0	3.7995	0	IM exclusive
BHPROD|NC_005956_387214_387008_-1_ATG_68	NC_005956	387008	387214	-1	ATG	204	1					NC_005956_03280	ORF_387008..387265_85aa_-1		BHPROD|MQB277_408216_408010_-1_ATG_68	68	CytoplasmicMembrane	1		CYT	-	-	-	-	-	-	-	-	-	-	-	-				0	0	0	NA	NA	230.747	278.567	514.032
BH_RS01545|rso|ens|geno|chemg|prod|NC_005956_386882_387061_+2_ATG_59	NC_005956	386882	387061	+2	ATG	177	1	BH_RS01545	BH03130	BH03130	386882..387061(+)	NC_005956_03270	ORF_386882..387061_59aa_+2	n to n	BHPROD|MQB277_407884_408063_+1_ATG_59	59	Unknown	0		CYT	-	-	-	-	-	-	-	-	-	-	-	-	Transcriptional regulator	aproNOG	K	0	0	0	NA	NA	79.3698	66.4072	168.649
BH_RS01550|rso|ens|geno|prod|NC_005956_388682_387357_-3_ATG_441	NC_005956	387357	388682	-3	ATG	1323	1	BH_RS01550	BH03140	BH03140		NC_005956_03290	ORF_387357..388682_441aa_-3	n to n	BHPROD|MQB277_409684_408359_-3_ATG_441	441	Unknown	0		CYT	-	-	PF12789;Phage tail repeat like	-	-	-	-	-	-	-	-	-	Inherit from bactNOG: tail fiber protein	proNOG	S	1	7	20	-1.11864	0.759033	80.0155	45.7744	179.994	9.53674e-06	9.89258	1.5	0	Cyt predominant
BH_RS01555|rso|ens|geno|chemg|prod|NC_005956_391840_388697_-1_ATG_1047	NC_005956	388697	391840	-1	ATG	3141	0	BH_RS01555	BH03150	BH03150	388697..391840(-)	NC_005956_03300	ORF_388697..391840_1047aa_-1	n to n	BHPROD|MQB277_412842_409699_-1_ATG_1047	1047	Unknown	0		CYT	-	-	-	-	-	-	-	-	-	-	-	-	virulence-associated protein	aproNOG	S	1	3	4	NA	NA	223.812	220.259	582.973	0	0	0.0405	4.5815
BHCHEMG|NC_005956_390963_390790_-2_GTG_57	NC_005956	390790	390963	-2	GTG	171	1				390790..390963(-)		ORF_390790..390942_50aa_-2			57	Unknown	0		CYT	-	-	-	-	-	-	-	-	-	-	-	-				0	0	0	NA	NA	0	0	0
BHCHEMG|NC_005956_390743_391306_+2_CTG_187	NC_005956	390743	391306	+2	CTG	561	1				390743..391306(+)		ORF_391007..391306_99aa_+2			187	Unknown	0		CYT	-	-	-	-	-	-	-	-	-	-	-	-				0	0	0	NA	NA	0	0	0
BHCHEMG|NC_005956_391697_391822_+2_ATG_41	NC_005956	391697	391822	+2	ATG	123	1				391697..391822(+)		ORF_391697..391822_41aa_+2			41	Unknown	0		CYT	-	-	-	-	-	-	-	-	-	-	-	-				0	0	0	NA	NA	0	0	0
BH_RS01560|rso|ens|geno|chemg|prod|NC_005956_392948_391842_-3_ATG_368	NC_005956	391842	392948	-3	ATG	1104	0	BH_RS01560	BH03160	BH03160	391842..392948(-)	NC_005956_03310	ORF_391842..392948_368aa_-3	n to n		368	Cytoplasmic	0		CYT	-	-	PF09684;Phage tail protein (Tail_P2_I)	-	-	-	-	-	-	-	-	-	phage protein	aproNOG	S	0	0	0	NA	NA	39.7122	43.5586	79.1726
BHCHEMG|NC_005956_391971_392192_+3_TTG_73	NC_005956	391971	392192	+3	TTG	219	1				391971..392192(+)		ORF_391989..392192_67aa_+3			73	Unknown	0		CYT	-	-	-	-	-	-	-	-	-	-	-	-	Transposase	aproNOG	L	0	0	0	NA	NA	0	0	0
BH_RS01565|rso|ens|geno|chemg|prod|NC_005956_393775_392948_-1_ATG_275	NC_005956	392948	393775	-1	ATG	825	0	BH_RS01565	BH03170	BH03170	392948..393775(-)	NC_005956_03320	ORF_392948..393775_275aa_-1	n to n	BHPROD|MQB277_414777_413950_-1_ATG_275	275	Cytoplasmic	0		CYT	-	-	PF04865;Baseplate J-like protein	PIRSF020481	-	-	-	-	-	-	-	-	Baseplate assembly protein	aproNOG	S	1	3	4	NA	NA	57.1187	46.7636	154.414	2.5	0	1.4	2.45	TM exclusive
BH_RS01570|-4aa_rso|chemg|prod|NC_005956_394113_393772_-2_TTG_113	NC_005956	393772	394113	-2	TTG	339	0	BH_RS01570	BH03180	BH03180	393772..394113(-)	NC_005956_03330	ORF_393772..394101_109aa_-2	n to n	BHPROD|MQB277_415115_414774_-2_TTG_113	113	Unknown	0		CYT	G3DSA:3.10.450.40	-	PF04965;Gene 25-like lysozyme	-	-	-	-	-	-	SSF160719	-	-	Baseplate assembly protein	aproNOG	S	0	0	0	NA	NA	13.6248	9.69796	35.5592
BHCHEMG|NC_005956_393698_393934_+2_ATG_78	NC_005956	393698	393934	+2	ATG	234	1				393698..393934(+)		ORF_393698..393934_78aa_+2			78	Unknown	0		CYT	-	-	-	-	-	-	-	-	-	-	-	-				0	0	0	NA	NA	0	0	0
BH_RS01575|rso|ens|geno|+26aa_chemg|prod|NC_005956_394799_394110_-3_ATG_229	NC_005956	394110	394799	-3	ATG	687	1	BH_RS01575	BH03190	BH03190	394110..394877(-)	NC_005956_03340	ORF_394110..394799_229aa_-3	n to n	BHPROD|MQB277_415801_415112_-3_ATG_229	229	Unknown	0		CYT	-	-	PF04717;Phage-related baseplate assembly protein,PF10106;Uncharacterized protein conserved in bacteria (DUF2345)	-	-	-	-	-	-	-	TIGR01644;phage_P2_V: phage baseplate assembly protein V	-	Baseplate assembly protein	aproNOG	S	0	0	0	NA	NA	27.6963	29.8636	63.7294
BH_RS01580|rso|ens|geno|+6aa_chemg|prod|NC_005956_395322_394780_-2_ATG_180	NC_005956	394780	395322	-2	ATG	540	1	BH_RS01580	BH03200	BH03200	394780..395340(-)	NC_005956_03350	ORF_394780..395322_180aa_-2	n to n	BHPROD|MQB277_416324_415782_-2_ATG_180	180	Unknown	0		CYT	-	-	-	-	-	-	-	-	-	-	-	-	NA	proNOG	S	1	2	4	NA	NA	4.46715	3.59184	7.18367	4.375	0	2.55	0	IM exclusive
BHCHEMG|NC_005956_394823_395047_+2_TTG_74	NC_005956	394823	395047	+2	TTG	222	1				394823..395047(+)		ORF_394922..395047_41aa_+2			74	CytoplasmicMembrane	0		CYT	-	-	-	-	-	-	-	-	-	-	-	-				0	0	0	NA	NA	0	0	0
BHCHEMG|NC_005956_395171_395344_+2_ATG_57	NC_005956	395171	395344	+2	ATG	171	1				395171..395344(+)		ORF_395171..395344_57aa_+2			57	CytoplasmicMembrane	0		CYT	-	-	-	-	-	-	-	-	-	-	-	-				0	0	0	NA	NA	0	0	0
BH_RS01585|rso|ens|geno|chemg|prod|NC_005956_395374_395646_+1_ATG_90	NC_005956	395374	395646	+1	ATG	270	1	BH_RS01585	BH03210	BH03210	395374..395646(+)	NC_005956_03360	ORF_395374..395646_90aa_+1	n to n	BHPROD|MQB277_416376_416648_+3_ATG_90	90	CytoplasmicMembrane	0		CYT	-	-	PF07927;YcfA-like protein	-	-	-	-	-	-	-	-	-	NA	proNOG	S	1	1	5	NA	NA	2531.64	572.403	4715.77	0	7.5	0	0	Cyt exclusive
BH_RS01590|rso|ens|geno|chemg|prod|NC_005956_395636_395953_+2_ATG_105	NC_005956	395636	395953	+2	ATG	315	1	BH_RS01590	BH03220	BH03220	395636..395953(+)	NC_005956_03370	ORF_395636..395953_105aa_+2	n to n	BHPROD|MQB277_416638_416955_+1_ATG_105	105	Unknown	0		CYT	G3DSA:1.10.1220.10	-	PF05534;HicB family	-	-	-	-	-	-	SSF143100,SSF47598	-	-	HicB family	aproNOG	S	1	5	39	-0.881605	0.694781	978.559	155.02	1786.41	2.08383e-07	9.96231	6.13125	0	Cyt predominant
BHGENO0382|chemg|prod|NC_005956_395999_396145_+2_ATG_48	NC_005956	395999	396145	+2	ATG	144	1			BARHE0382	395999..396145(+)	NC_005956_03380	ORF_395999..396145_48aa_+2		BHPROD|MQB277_417001_417147_+1_ATG_48	48	Unknown	0		CYT	-	-	PF12441;Protein of unknown function (DUF3680)	-	-	-	-	-	-	-	-	-	Protein of unknown function (DUF3680)	aproNOG	S	0	0	0	NA	NA	528.825	355.592	1239.18
BH_RS01595|rso|ens|geno|+62aa_chemg|+11aa_prod|NC_005956_396472_396194_-1_ATG_92	NC_005956	396194	396472	-1	ATG	276	1	BH_RS01595	BH03230	BH03230	396194..396658(-)	NC_005956_03390	ORF_396194..396505_103aa_-1	n to n	BHPROD|MQB277_417507_417196_-1_ATG_103	92	Unknown	0		CYT	-	-	-	-	-	-	-	-	-	-	-	-				0	0	0	NA	NA	265.035	315.012	453.259
BH_RS01600|rso|ens|geno|chemg|prod|NC_005956_397227_396469_-2_ATG_252	NC_005956	396469	397227	-2	ATG	756	1	BH_RS01600	BH03240	BH03240	396469..397227(-)	NC_005956_03400	ORF_396469..397227_252aa_-2	n to n	BHPROD|MQB277_418229_417471_-2_ATG_252	252	Cytoplasmic	0		CYT	-	-	PF03374;Phage antirepressor protein KilAC domain,PF08346;AntA/AntB antirepressor	-	-	-	-	-	-	-	-	-	Anti-repressor protein	aproNOG	K	0	0	0	NA	NA	2463.99	2910.43	5425.64
BH_RS01605|rso|ens|geno|chemg|prod|NC_005956_397800_397246_-2_ATG_184	NC_005956	397246	397800	-2	ATG	552	1	BH_RS01605	BH03250	BH03250	397246..397800(-)	NC_005956_03410	ORF_397246..397800_184aa_-2	n to n	BHPROD|MQB277_418802_418248_-2_ATG_184	184	Cytoplasmic	0		CYT	-	-	PF08346;AntA/AntB antirepressor	-	-	-	-	-	-	-	-	-	Anti-repressor protein	aproNOG	K	0	0	0	NA	NA	924.397	377.871	2572.58
BHGENOBH03260_p|chemg|NC_005956_398057_397899_-3_ATG_52	NC_005956	397899	398057	-3	ATG	156	1		BH03260(p)	BH03260(p)	397899..398057(-)		ORF_397899..398057_52aa_-3	p to 0		52	Unknown	0		CYT	-	-	-	-	-	-	-	-	-	-	-	-				0	0	0	NA	NA	23.9286	12.6533	73.493
BHCHEMG|NC_005956_397848_397976_+3_GTG_42	NC_005956	397848	397976	+3	GTG	126	1		BH03260(p)	BH03260(p)	397848..397976(+)		ORF_397887..397976_29aa_+3	p to 0		42	Unknown	0		CYT	-	-	-	-	-	-	-	-	-	-	-	-				0	0	0	NA	NA	130.723	85.0698	371.472
BHCHEMG|NC_005956_398912_398676_-3_ATG_78	NC_005956	398676	398912	-3	ATG	234	1				398676..398912(-)		ORF_398676..398912_78aa_-3			78	Unknown	0		CYT	-	-	-	-	-	-	-	-	-	-	-	-				0	0	0	NA	NA	0	0	0
BH_RS01610|rso|ens|geno|chemg|prod|NC_005956_398185_399258_+1_ATG_357	NC_005956	398185	399258	+1	ATG	1071	1	BH_RS01610	BH03270	BH03270	398185..399258(+)	NC_005956_03420	ORF_398185..399258_357aa_+1	n to n	BHPROD|MQB277_419187_420260_+3_ATG_357	357	CytoplasmicMembrane	4		CYT	-	-	-	-	-	-	-	-	-	-	-	TMhelix;Region of a membrane-bound protein predicted to be embedded in the membrane.	Membrane	bactNOG	S	1	16	183	-1.06656	0.269688	636.098	741.809	1622.28	10	0	7.81587	0.895298	IM predominant
BH_RS01615|rso|ens|geno|+13aa_chemg|prod|NC_005956_399647_399294_-3_ATG_117	NC_005956	399294	399647	-3	ATG	351	1	BH_RS01615	BH03280	BH03280	399294..399686(-)	NC_005956_03430	ORF_399294..399647_117aa_-3	n to n	BHPROD|MQB277_420649_420296_-3_ATG_117	117	Unknown	0		CYT	-	-	-	-	-	-	-	-	-	-	-	-	NA	proNOG	S	0	0	0	NA	NA	111.213	122.571	354.245
BH_RS01620|rso|ens|geno|chemg|prod|NC_005956_400725_399649_-2_ATG_358	NC_005956	399649	400725	-2	ATG	1074	1	BH_RS01620	BH03290	BH03290	399649..400725(-)	NC_005956_03440	ORF_399649..400725_358aa_-2	n to n	BHPROD|MQB277_421727_420651_-2_ATG_358	358	Unknown	0		CYT	-	-	PF03864;Phage major capsid protein E	-	-	-	-	-	-	-	-	-	Phage protein gp20	aproNOG	S	1	32	251	0.177973	0.834755	148.738	120.4	262.571	9.999	0	0	10	TM exclusive
BHCHEMG|NC_005956_399646_400032_+1_ATG_128	NC_005956	399646	400032	+1	ATG	384	1				399646..400032(+)		ORF_399646..400032_128aa_+1			128	Unknown	0		CYT	-	-	-	-	-	-	-	-	-	-	-	-				0	0	0	NA	NA	0	0	0
BH_RS01625|rso|ens|geno|+9aa_chemg|prod|NC_005956_401106_400738_-2_ATG_122	NC_005956	400738	401106	-2	ATG	366	1	BH_RS01625	BH03300	BH03300	400738..401133(-)	NC_005956_03450	ORF_400738..401133_131aa_-2	n to n	BHPROD|MQB277_422108_421740_-2_ATG_122	122	Unknown	0		CYT	G3DSA:2.40.300.10	-	PF02924;Bacteriophage lambda head decoration protein D	-	-	-	-	-	-	-	-	-	NA	aproNOG	S	1	15	68	-0.597812	0.710801	12.2976	14.2287	25.4618	8.64695	0.000724792	0	9.99635	OM predominant
BH_RS01630|+31aa_rso|-32aa_chemg|NC_005956_401423_401103_-3_ATT_106	NC_005956	401103	401423	-3	ATT	318	1	BH_RS01630	BH03310	BH03310	401103..401327(-)		ORF_401103..401516_137aa_-3	n to n		106	Unknown	0		CYT	-	-	-	-	-	-	-	-	-	-	-	-	peptidase S49	aproNOG	OU	0	0	0	NA	NA	4.64063	2.19695	8.31702
BH_RS01635|+22aa_rso|prod|NC_005956_402409_401366_-1_ATG_347	NC_005956	401366	402409	-1	ATG	1041	1	BH_RS01635	BH03320	BH03320	401366..402475(-)	NC_005956_03460	ORF_401366..402442_358aa_-1	n to n	BHPROD|MQB277_423411_422368_-1_ATG_347	347	Unknown	0		CYT	G3DSA:3.90.226.10	-	PF01343;Peptidase family S49	-	-	-	-	-	-	SSF52096	-	-	peptidase S49	aproNOG	OU	0	0	0	NA	NA	18.0473	16.034	36.2057
BHCHEMG|NC_005956_401627_402001_+2_TTG_124	NC_005956	401627	402001	+2	TTG	372	1				401627..402001(+)		ORF_401786..402001_71aa_+2			124	Unknown	1		CYT	-	-	-	-	-	-	-	-	-	-	-	-				0	0	0	NA	NA	0	0	0
BH_RS01640|rso|ens|geno|chemg|prod|NC_005956_403955_402399_-3_ATG_518	NC_005956	402399	403955	-3	ATG	1554	0	BH_RS01640	BH03330	BH03330	402399..403955(-)	NC_005956_03470	ORF_402399..403955_518aa_-3	n to n	BHPROD|MQB277_424957_423401_-3_ATG_518	518	Cytoplasmic	0		CYT	-	-	PF05136;Phage portal protein, lambda family	-	-	-	-	-	-	-	TIGR01539;portal_lambda: phage portal protein, lambda family	-	Phage portal protein, lambda family	aproNOG	S	1	5	14	-2.11864	0.66587	17.7322	16.0399	52.3147	6.83594	0	0.0529604	4.76326	TM exclusive
BHCHEMG|NC_005956_402276_402452_+3_ATG_58	NC_005956	402276	402452	+3	ATG	174	1				402276..402452(+)		ORF_402276..402452_58aa_+3			58	Unknown	1		CYT	-	-	-	-	-	-	-	-	-	-	-	TMhelix;Region of a membrane-bound protein predicted to be embedded in the membrane.				0	0	0	NA	NA	0	0	0
BHCHEMG|NC_005956_402841_402674_-1_ATG_55	NC_005956	402674	402841	-1	ATG	165	1				402674..402841(-)		ORF_402674..402916_80aa_-1			55	Unknown	0		CYT	-	-	-	-	-	-	-	-	-	-	-	TMhelix;Region of a membrane-bound protein predicted to be embedded in the membrane.				0	0	0	NA	NA	0	0	0
BHCHEMG|NC_005956_402449_402802_+2_CTG_117	NC_005956	402449	402802	+2	CTG	351	1				402449..402802(+)		ORF_402497..402802_101aa_+2			117	Unknown	0		CYT	-	-	-	-	-	-	-	-	-	-	-	-	NA	NOG	S	0	0	0	NA	NA	0	0	0
BHCHEMG|NC_005956_403552_403238_-1_TTG_104	NC_005956	403238	403552	-1	TTG	312	1				403238..403552(-)		ORF_403238..403537_99aa_-1			104	CytoplasmicMembrane	1	yes	TMH	-	-	-	-	-	-	-	-	-	-	-	TMhelix;Region of a membrane-bound protein predicted to be embedded in the membrane.				0	0	0	NA	NA	0	0	0
BHCHEMG|NC_005956_403260_403568_+3_TTG_102	NC_005956	403260	403568	+3	TTG	306	1				403260..403568(+)		ORF_403287..403568_93aa_+3			102	Unknown	0		CYT	-	-	-	-	-	-	-	-	-	-	-	-				0	0	0	NA	NA	0	0	0
BH_RS01645|rso|ens|geno|chemg|prod|NC_005956_404203_403955_-1_ATG_82	NC_005956	403955	404203	-1	ATG	246	1	BH_RS01645	BH03340	BH03340	403955..404203(-)	NC_005956_03480	ORF_403955..404203_82aa_-1	n to n	BHPROD|MQB277_425205_424957_-1_ATG_82	82	Unknown	0		CYT	-	-	-	-	-	-	-	-	-	-	-	-	NA	aproNOG	S	0	0	0	NA	NA	4.81077	3.52276	16.9922
BH_RS01650|rso|ens|geno|chemg|prod|NC_005956_406135_404207_-1_ATG_642	NC_005956	404207	406135	-1	ATG	1926	0	BH_RS01650	BH03350	BH03350	404207..406135(-)	NC_005956_03490	ORF_404207..406135_642aa_-1	n to n	BHPROD|MQB277_427137_425209_-1_ATG_642	642	Cytoplasmic	0		CYT	-	-	PF05876;Phage terminase large subunit (GpA)	-	-	-	-	-	-	-	-	-	Terminase large subunit	aproNOG	S	0	0	0	NA	NA	53.1192	63.6929	130.586
BHCHEMG|NC_005956_404811_404533_-2_TTG_92	NC_005956	404533	404811	-2	TTG	276	1				404533..404811(-)		ORF_404533..404772_79aa_-2			92	Unknown	0		CYT	-	-	-	-	-	-	-	-	-	-	-	-				0	0	0	NA	NA	0	0	0
BHCHEMG|NC_005956_405429_405169_-2_GTG_86	NC_005956	405169	405429	-2	GTG	258	1				405169..405429(-)		ORF_405169..405426_85aa_-2			86	Unknown	0		CYT	-	-	-	-	-	-	-	-	-	-	-	-				0	0	0	NA	NA	0	0	0
BHCHEMG|NC_005956_405657_405836_+3_CTG_59	NC_005956	405657	405836	+3	CTG	177	1				405657..405836(+)		ORF_405708..405836_42aa_+3			59	CytoplasmicMembrane	0		CYT	-	-	-	-	-	-	-	-	-	-	-	-				0	0	0	NA	NA	0	0	0
BH_RS01655|rso|ens|geno|+12aa_chemg|prod|NC_005956_406709_406128_-3_ATG_193	NC_005956	406128	406709	-3	ATG	579	1	BH_RS01655	BH03360	BH03360	406128..406745(-)	NC_005956_03500	ORF_406128..406745_205aa_-3	n to n	BHPROD|MQB277_427711_427130_-3_ATG_193	193	Cytoplasmic	0		CYT	-	-	-	-	-	-	-	-	-	-	-	-	NA	aproNOG	S	0	0	0	NA	NA	36.854	31.3163	89.4031
BH_RS01660|rso|ens|geno|chemg|prod|NC_005956_406772_407086_+2_ATG_104	NC_005956	406772	407086	+2	ATG	312	0	BH_RS01660	BH03370	BH03370	406772..407086(+)	NC_005956_03510	ORF_406772..407086_104aa_+2	n to n	BHPROD|MQB277_427774_428088_+1_ATG_104	104	Cytoplasmic	0		CYT	-	-	PF05015;Plasmid maintenance system killer protein	-	-	-	-	-	-	SSF143011	-	-	Plasmid maintenance system killer protein	aproNOG	S	0	0	0	NA	NA	1499.06	1084	3438.01
BH_RS01665|rso|ens|geno|chemg|prod|NC_005956_407103_407399_+3_ATG_98	NC_005956	407103	407399	+3	ATG	294	0	BH_RS01665	BH03380	BH03380	407103..407399(+)	NC_005956_03520	ORF_407103..407399_98aa_+3	n to n	BHPROD|MQB277_428105_428401_+2_ATG_98	98	Unknown	0		CYT	G3DSA:1.10.260.40	-	PF01381;Helix-turn-helix	-	-	-	PS50943;Cro/C1-type HTH domain profile.	-	SM00530;Helix-turn-helix XRE-family like proteins	SSF47413	TIGR02607;antidote_HigA: addiction module antidote protein, HigA family	-	plasmid maintenance system antidote protein, XRE family	aproNOG	S	1	2	6	NA	NA	551.075	404.426	1302	0	8.75	0	0	Cyt exclusive
BHRSO03390|ens|geno|NC_005956_407511_407684_+3_TTG_57	NC_005956	407511	407684	+3	TTG	171	1		BH03390	BH03390			ORF_407511..407684_57aa_+3	n to 0		57	Unknown	0		CYT	-	-	-	-	-	-	-	-	-	-	-	-	NA	aproNOG	S	0	0	0	NA	NA	662.068	405.429	1422.37
BH_RS01670|rso|ens|geno|chemg|prod|NC_005956_407809_408072_+1_ATG_87	NC_005956	407809	408072	+1	ATG	261	1	BH_RS01670	BH03400	BH03400	407809..408072(+)	NC_005956_03530	ORF_407809..408072_87aa_+1	n to n	BHPROD|MQB277_428811_429074_+3_ATG_87	87	Unknown	0		CYT	-	-	PF04221;RelB antitoxin	PIRSF003108	-	-	-	-	-	-	TIGR02384;RelB_DinJ: addiction module antitoxin, RelB/DinJ family	-	DNA-damage-inducible protein	aproNOG	L	1	10	33	-0.948719	0.705654	488.087	253.39	1306.12	0.00523093	5.8059	0	0	Cyt predominant
BH_RS01675|rso|ens|geno|prod|NC_005956_408059_408340_+2_ATG_93	NC_005956	408059	408340	+2	ATG	279	1	BH_RS01675	BH03410	BH03410		NC_005956_03540	ORF_408050..408340_96aa_+2	n to n	BHPROD|MQB277_429061_429342_+1_ATG_93	93	Unknown	0		CYT	-	-	PF05016;Plasmid stabilisation system protein	PIRSF006156	-	-	-	-	-	SSF143011	TIGR02385;RelE_StbE: addiction module toxin, RelE/StbE family	-	addiction module toxin, RelE StbE family	aproNOG	S	1	2	2	NA	NA	414.349	362.896	1086.67	2.5	0	1.5	0	IM exclusive
BH_RS01680|rso|ens|geno|+38aa_chemg|prod|NC_005956_408661_408383_-1_ATG_92	NC_005956	408383	408661	-1	ATG	276	1	BH_RS01680	BH03420	BH03420	408383..408775(-)	NC_005956_03550	ORF_408383..408661_92aa_-1	n to n	BH_RS01480|rso|ens|geno|+38aa_chemg|prod|NC_005956_376643_376365_-3_ATG_92,BHPROD|MQB277_397645_397367_-3_ATG_92,BHPROD|MQB277_429663_429385_-1_ATG_92	92	Unknown	0		CYT	-	-	-	-	-	-	-	-	-	-	-	-				1	2	3	NA	NA	9.37011	11.0383	19.5142
BH_RS01685|rso|ens|geno|+46aa_chemg|prod|NC_005956_409416_408658_-2_ATG_252	NC_005956	408658	409416	-2	ATG	756	1	BH_RS01685	BH03430	BH03430	408658..409554(-)	NC_005956_03560	ORF_408658..409554_298aa_-2	n to n	BHPROD|MQB277_430418_429660_-2_ATG_252	252	Cytoplasmic	0		CYT	-	-	PF08346;AntA/AntB antirepressor,PF03374;Phage antirepressor protein KilAC domain	-	-	-	-	-	-	-	-	-	Anti-repressor protein	aproNOG	K	0	0	0	NA	NA	723.152	854.276	1557.38
BH_RS01690|rso|ens|geno|chemg|prod|NC_005956_409991_409476_-3_ATG_171	NC_005956	409476	409991	-3	ATG	513	1	BH_RS01690	BH03440	BH03440	409476..409991(-)	NC_005956_03570	ORF_409476..409991_171aa_-3	n to n	BHPROD|MQB277_430993_430478_-3_ATG_171	171	Unknown	0		CYT	-	-	PF08346;AntA/AntB antirepressor	-	-	-	-	-	-	-	-	-	anti-repressor protein	aproNOG	K	0	0	0	NA	NA	128.58	93.0637	401.665
BHRSO03450|ens|geno|chemg|prod|NC_005956_410847_410008_-2_ATG_279	NC_005956	410008	410847	-2	ATG	837	1	BH_RS01695(p)	BH03450	BH03450	410008..410847(-)	NC_005956_03580	ORF_410008..410847_279aa_-2	n to p	BHPROD|MQB277_431849_431010_-2_ATG_279	279	Cytoplasmic	0		CYT	-	-	PF08346;AntA/AntB antirepressor,PF03374;Phage antirepressor protein KilAC domain	-	-	-	-	-	-	-	-	-	Anti-repressor protein	aproNOG	K	0	0	0	NA	NA	1892.32	1781.13	5035.97
BH_RS01700|rso|ens|geno|chemg|prod|NC_005956_411421_410879_-1_ATG_180	NC_005956	410879	411421	-1	ATG	540	1	BH_RS01700	BH03460	BH03460	410879..411421(-)	NC_005956_03590	ORF_410879..411421_180aa_-1	n to n	BHPROD|MQB277_432423_431881_-1_ATG_180	180	Cytoplasmic	0		CYT	-	-	PF08346;AntA/AntB antirepressor	-	-	-	-	-	-	-	-	-	Anti-repressor protein	aproNOG	K	0	0	0	NA	NA	215.348	170.504	591.124
BHCHEMG|NC_005956_410992_411084_+1_ATG_30	NC_005956	410992	411084	+1	ATG	90	1				410992..411084(+)		ORF_410992..411084_30aa_+1			30	Unknown	0		CYT	-	-	-	-	-	-	-	-	-	-	-	-				0	0	0	NA	NA	0	0	0
BHRSO03470|ens|geno|NC_005956_411704_411438_-3_TTG_88	NC_005956	411438	411704	-3	TTG	264	1		BH03470	BH03470			ORF_411438..411575_45aa_-3	n to 0		88	Unknown	0		CYT	-	-	-	-	-	-	-	-	-	-	-	-				0	0	0	NA	NA	140.197	63.7872	369.735
BH_RS01705|rso|ens|geno|chemg|prod|NC_005956_412596_412018_-2_TTG_192	NC_005956	412018	412596	-2	TTG	576	0	BH_RS01705	BH03480	BH03480	412018..412596(-)	NC_005956_03600	ORF_412018..412212_64aa_-2	n to n	BHPROD|MQB277_433598_433020_-2_TTG_192	192	Unknown	0		CYT	-	-	-	-	-	-	-	-	-	-	-	-	NA	aproNOG	S	0	0	0	NA	NA	45.8673	34.6867	121.725
BH_RS01710|rso|ens|geno|prod|NC_005956_412920_412600_-2_ATG_106	NC_005956	412600	412920	-2	ATG	318	1	BH_RS01710	BH03490	BH03490		NC_005956_03610	ORF_412600..412920_106aa_-2	n to n	BHPROD|MQB277_433922_433602_-2_ATG_106	106	Unknown	0		CYT	-	-	-	-	-	-	-	-	-	-	-	-				1	6	31	-0.00316728	1	13.6561	10.8267	36.7801	0	9.99969	4.15965	0	Cyt exclusive
BHRSO03500|ens|geno|NC_005956_413355_413179_-2_TTG_58	NC_005956	413179	413355	-2	TTG	174	1		BH03500	BH03500			ORF_413179..413355_58aa_-2	n to 0		58	Unknown	0		CYT	-	-	-	-	-	-	-	-	-	-	-	-				0	0	0	NA	NA	142.812	138.542	308.092
BH_RS01715|rso|ens|geno|chemg|prod|NC_005956_413788_413393_-1_ATG_131	NC_005956	413393	413788	-1	ATG	393	1	BH_RS01715	BH03510	BH03510	413393..413788(-)	NC_005956_03620	ORF_413393..413788_131aa_-1	n to n	BHPROD|MQB277_434790_434395_-1_ATG_131	131	Unknown	0		CYT	-	-	PF03681;Uncharacterised protein family (UPF0150)	-	-	-	-	-	-	SSF143100	-	-	Uncharacterised protein family (UPF0150)	aproNOG	S	1	15	127	-0.301021	0.799172	638.319	356.466	1041	0	9.99997	0.179165	9.08259	Cyt predominant
BH_RS01720_p_-14aa_rso|ens|geno|prod|NC_005956_413943_413785_-2_ATG_52	NC_005956	413785	413943	-2	ATG	156	1	BH_RS01720(p)	BH03520	BH03520		NC_005956_03630	ORF_413785..413943_52aa_-2	n to p		52	Unknown	0		CYT	G3DSA:3.30.920.30	-	PF07927;YcfA-like protein	-	-	-	-	-	-	SSF54786	-	-	YcfA family	aproNOG	S	0	0	0	NA	NA	0	0	0
BHCHEMG|NC_005956_413732_413953_+2_TTG_73	NC_005956	413732	413953	+2	TTG	219	1	BH_RS01720(p)			413732..413953(+)		ORF_413762..413953_63aa_+2	n to p		73	Unknown	0		CYT	-	-	-	-	-	-	-	-	-	-	-	-				0	0	0	NA	NA	293.901	32.3265	580.531
BH_RS01725_p|rso|ens|geno|+51aa_chemg|-10aa_prod|NC_005956_414618_414079_-2_ATG_179	NC_005956	414079	414618	-2	ATG	537	0	BH_RS01725(p)	BH03530	BH03530	414079..414771(-)	NC_005956_03640	ORF_414079..414771_230aa_-2	n to p		179	Cytoplasmic	0		CYT	-	-	-	-	-	-	-	-	-	-	-	-	NA	aproNOG	S	1	5	9	NA	NA	115.088	220.331	234.793	0	0	3.285	0	IM exclusive
BHCHEMG|NC_005956_414602_414438_-3_CTG_54	NC_005956	414438	414602	-3	CTG	162	1	BH_RS01725(p)			414438..414602(-)		ORF_414438..414599_53aa_-3	n to p		54	Unknown	0		CYT	-	-	-	-	-	-	-	-	-	-	-	-				0	0	0	NA	NA	0	0	0
BH_RS01730|rso|ens|geno|chemg|prod|NC_005956_415045_414599_-1_ATG_148	NC_005956	414599	415045	-1	ATG	444	0	BH_RS01730	BH03540	BH03540	414599..415045(-)	NC_005956_03650	ORF_414599..415045_148aa_-1	n to n	BHPROD|MQB277_436045_435599_-3_ATG_148	148	Cytoplasmic	0		CYT	G3DSA:2.40.50.140	PTHR10302,PTHR10302:SF0	PF00436;Single-strand binding protein family	-	-	-	PS50935;Single-strand binding (SSB) domain profile.	-	-	SSF50249	TIGR00621;ssb: single-stranded DNA-binding protein	-	single-stranded DNA-binding protein	aproNOG	L	1	2	29	0.968818	0.697945	86.0558	75.6319	213.477	4.56382e-11	9.99845	0	0	Cyt predominant
BHGENOBH03550_fCDS1_p|prod|NC_005956_415237_415350_+1_ATG_37	NC_005956	415237	415350	+1	ATG	111	1	BH_RS01735(p)	BH03550(p)	BH03550(p)		NC_005956_03660	ORF_415237..415350_37aa_+1	p to p		37	Unknown	0		CYT	-	-	PF05015;Plasmid maintenance system killer protein	-	-	-	-	-	-	-	-	-	Plasmid maintenance system killer	aproNOG	S	0	0	0	NA	NA	52.4374	16.4119	103.942
BH_RS01735_p_-46aa_geno_fCDS2_p|prod|NC_005956_415377_415520_+3_ATG_47	NC_005956	415377	415520	+3	ATG	141	1	BH_RS01735(p)	BH03550(p)	BH03550-2(p)		NC_005956_03670	ORF_415377..415520_47aa_+3	p to p	BH_RS04615|rso|ens|geno|chemg|prod|NC_005956_1044456_1044737_+3_ATG_93,BHPROD|MQB277_1064870_1065151_+2_ATG_93,BHPROD|MQB277_436236_436517_+3_ATG_93	47	Unknown	0		CYT	-	-	PF05015;Plasmid maintenance system killer protein	-	-	-	-	-	-	SSF143011	-	-	Plasmid maintenance system killer	aproNOG	S	0	0	0	NA	NA	0	0	0
BH_RS01740|-1aa_rso|chemg|prod|NC_005956_415537_415830_+1_ATG_97	NC_005956	415537	415830	+1	ATG	291	1	BH_RS01740	BH03560	BH03560	415537..415830(+)	NC_005956_03680	ORF_415537..415830_97aa_+1	n to n	BH_RS04620|-1aa_rso|chemg|prod|NC_005956_1044754_1045047_+1_ATG_97,BHPROD|MQB277_1065168_1065461_+3_ATG_97,BHPROD|MQB277_436534_436827_+1_ATG_97	97	Unknown	0		CYT	G3DSA:1.10.260.40	-	PF01381;Helix-turn-helix	-	-	-	PS50943;Cro/C1-type HTH domain profile.	-	-	SSF47413	TIGR02607;antidote_HigA: addiction module antidote protein, HigA family	-	Plasmid maintenance system antidote protein	aproNOG	S	1	13	132	-0.15517	0.901805	3.49496	1.69202	9.52876	9.64968e-07	8.29555	3.44409	1.02995	Cyt predominant
BHRSO03570|ens|geno|prod|NC_005956_416199_415927_-2_ATG_90	NC_005956	415927	416199	-2	ATG	270	1	BH_RS01745(p)	BH03570	BH03570		NC_005956_03690	ORF_415927..416199_90aa_-2	n to p		90	Unknown	0		CYT	-	-	-	-	-	-	-	-	-	-	-	-				0	0	0	NA	NA	10.9648	6.85714	28.4082
BH_RS01750_+63aa_chemg|NC_005956_416972_416364_-3_ATG_202	NC_005956	416364	416972	-3	ATG	606	1	BH_RS01750	BH03580	BH03580	416364..416972(-)	NC_005956_03700	ORF_416364..416972_202aa_-3	n to n	BHPROD_+63aa_orf|MQB277_437968_437360_-3_ATG_202	202	Unknown	0		CYT	-	-	-	-	-	-	-	-	-	-	-	-	NA	aproNOG	S	1	6	17	NA	NA	298.933	448.332	551.671	0.781269	1.71875	3.35291	0.411772
BH_RS01755|rso|ens|geno|chemg|prod|NC_005956_417888_416776_-2_ATG_370	NC_005956	416776	417888	-2	ATG	1110	1	BH_RS01755	BH03590	BH03590	416776..417888(-)	NC_005956_03710	ORF_416776..417888_370aa_-2	n to n	BHPROD|MQB277_438884_437772_-2_ATG_370	370	Cytoplasmic	0		CYT	-	-	PF07120;Protein of unknown function (DUF1376)	-	-	-	-	-	-	-	-	-	Protein of unknown function (DUF1376)	aproNOG	S	0	0	0	NA	NA	36.8727	46.2487	68.2524
BHORF|NC_005956_417515_417354_-3_ATG_53	NC_005956	417354	417515	-3	ATG	159	1						ORF_417354..417515_53aa_-3			53	Unknown	0	yes	TMH	-	-	-	-	-	-	-	-	-	-	-	TMhelix;Region of a membrane-bound protein predicted to be embedded in the membrane.				0	1	1	NA	NA	0	0	0
BH_RS01760|rso|ens|geno|chemg|prod|NC_005956_418225_417878_-1_ATG_115	NC_005956	417878	418225	-1	ATG	345	1	BH_RS01760	BH03600	BH03600	417878..418225(-)	NC_005956_03720	ORF_417878..418225_115aa_-1	n to n	BHPROD|MQB277_439221_438874_-1_ATG_115	115	Unknown	0		CYT	-	-	PF07120;Protein of unknown function (DUF1376)	-	-	-	-	-	-	-	-	-	Protein of unknown function (DUF1376)	aproNOG	S	1	2	4	NA	NA	10.8861	9.13904	22.6588	0	0	3.7995	0	IM exclusive
BH_RS01765|rso|ens|geno|chemg|prod|NC_005956_418694_418218_-3_ATG_158	NC_005956	418218	418694	-3	ATG	474	1	BH_RS01765	BH03610	BH03610	418218..418694(-)	NC_005956_03730	ORF_418218..418694_158aa_-3	n to n	BHPROD|MQB277_439690_439214_-3_ATG_158	158	Unknown	0		CYT	G3DSA:3.30.420.10	-	-	-	-	-	-	-	-	SSF53098	-	-	Inherit from proNOG: bacteriophage-related protein	aproNOG	S	0	0	0	NA	NA	12.8294	9.0672	28.5814
BHCHEMG|NC_005956_419303_418719_-3_TTG_194	NC_005956	418719	419303	-3	TTG	582	1				418719..419303(-)		ORF_418719..419285_188aa_-3			194	CytoplasmicMembrane	2	yes	CYT	-	-	-	-	-	-	-	-	-	-	-	TMhelix;Region of a membrane-bound protein predicted to be embedded in the membrane.				0	0	0	NA	NA	5.92714	6.22877	10.0133
BH_RS01770|rso|ens|geno|+33aa_chemg|NC_005956_418822_419598_+1_ATG_258	NC_005956	418822	419598	+1	ATG	774	1	BH_RS01770	BH03620	BH03620	418723..419598(+)	NC_005956_03740	ORF_418723..419598_291aa_+1	n to n	BHPROD|MQB277_439719_440594_+3_ATG_291	258	Unknown	1		CYT	-	-	-	-	-	-	-	-	-	-	-	TMhelix;Region of a membrane-bound protein predicted to be embedded in the membrane.				1	4	21	-1.62114	0.639852	99.7427	66.5697	281.995	6.99661	0.0195312	2.53742	1.26408	TM predominant
BH_RS01775|+10aa_rso|-19aa_prod|NC_005956_420029_419607_-3_ATG_140	NC_005956	419607	420029	-3	ATG	420	1	BH_RS01775	BH03630	BH03630	419607..420059(-)	NC_005956_03750	ORF_419607..420059_150aa_-3	n to n		140	Cytoplasmic	0		CYT	-	-	-	-	-	-	-	-	-	-	-	-	Site-specific recombinase phage integrase	proNOG	L	1	10	53	-0.616144	0.742996	51.5632	31.7417	122.022	9.98997	0	3.39293	4.98978	TM exclusive
BH_RS01780|+2aa_rso|prod|NC_005956_420431_420072_-3_ATG_119	NC_005956	420072	420431	-3	ATG	357	1	BH_RS01780	BH03640	BH03640		NC_005956_03760	ORF_420072..420431_119aa_-3	n to n	BHPROD|MQB277_441427_441068_-3_ATG_119	119	Unknown	0		CYT	-	-	-	-	-	-	-	-	-	-	-	-	NA	aproNOG	S	1	2	2	NA	NA	43.8281	20.3269	94.4452	0	0	2.55	0	IM exclusive
BHCHEMG|NC_005956_420921_420823_-2_ATG_32	NC_005956	420823	420921	-2	ATG	96	1				420823..420921(-)		ORF_420823..420921_32aa_-2			32	Unknown	0		CYT	-	-	-	-	-	-	-	-	-	-	-	-				0	0	0	NA	NA	0	0	0
BH_RS01785|rso|ens|geno|+9aa_chemg|prod|NC_005956_420515_421132_+2_ATG_205	NC_005956	420515	421132	+2	ATG	615	1	BH_RS01785	BH03650	BH03650	420488..421132(+)	NC_005956_03770	ORF_420488..421132_214aa_+2	n to n	BHPROD|MQB277_441511_442128_+1_ATG_205	205	Unknown	0		CYT	G3DSA:1.10.260.40,G3DSA:2.10.109.10	-	-	-	-	-	-	-	SM00530;Helix-turn-helix XRE-family like proteins	SSF47413,SSF51306	-	-	NA	aproNOG	S	1	15	152	-0.393504	0.710416	368.653	422.984	929.799	0	10	4.41176	0	Cyt predominant
BH_RS01790|rso|ens|geno|chemg|prod|NC_005956_421374_421748_+3_ATG_124	NC_005956	421374	421748	+3	ATG	372	1	BH_RS01790	BH03660	BH03660	421374..421748(+)	NC_005956_03780	ORF_421374..421748_124aa_+3	n to n	BHPROD|MQB277_442370_442744_+2_ATG_124	124	Cytoplasmic	0		CYT	-	-	-	-	-	-	-	-	-	-	-	-				0	0	0	NA	NA	174.777	103.627	433.149
BH_RS01795|rso|ens|geno|+4aa_chemg|prod|NC_005956_421813_422205_+1_ATG_130	NC_005956	421813	422205	+1	ATG	390	1	BH_RS01795	BH03670	BH03670	421801..422205(+)	NC_005956_03790	ORF_421801..422205_134aa_+1	n to n	BHPROD|MQB277_442809_443201_+3_ATG_130	130	Cytoplasmic	0		CYT	-	-	PF09669;Phage regulatory protein Rha (Phage_pRha)	-	-	-	-	-	-	-	-	-	anti-repressor protein	aproNOG	K	1	2	2	NA	NA	45.8321	26.1859	102.273	0	0	2.55	0	IM exclusive
BHRSO03680|ens|geno|chemg|prod|NC_005956_422215_422682_+1_ATG_155	NC_005956	422215	422682	+1	ATG	465	1	BH_RS01800(p)	BH03680	BH03680	422215..422682(+)	NC_005956_03800	ORF_422215..422682_155aa_+1	n+n to p		155	Cytoplasmic	0		CYT	-	-	PF08346;AntA/AntB antirepressor	-	-	-	-	-	-	-	-	-	Anti-repressor protein	aproNOG	K	0	0	0	NA	NA	324.354	167.957	912.17
BH_RS01800_p_-152aa_rso|ens|geno|chemg|NC_005956_422672_422974_+2_TTG_100	NC_005956	422672	422974	+2	TTG	300	1	BH_RS01800(p)	BH03690	BH03690	422672..422974(+)		ORF_422741..422974_77aa_+2	n+n to p	BH_RS03420|rso|ens|geno|+2aa_chemg|prod|NC_005956_810835_810104_-1_ATG_243,BHPROD|MQB277_1036806_1037537_+3_ATG_243	100	Unknown	0		CYT	-	-	PF03374;Phage antirepressor protein KilAC domain	-	-	-	-	-	-	-	-	-	anti-repressor protein	aproNOG	K	0	0	0	NA	NA	0	0	0
BH_RS01805|rso|ens|geno|chemg|prod|NC_005956_422987_423370_+2_ATG_127	NC_005956	422987	423370	+2	ATG	381	1	BH_RS01805	BH03700	BH03700	422987..423370(+)	NC_005956_03810	ORF_422987..423370_127aa_+2	n to n	BH_RS03415|rso|ens|geno|chemg|prod|NC_005956_810091_809708_-1_ATG_127,BHPROD|MQB277_1037550_1037933_+3_ATG_127	127	Cytoplasmic	0		CYT	G3DSA:2.160.10.10	-	-	-	-	-	-	-	-	SSF51161	-	-	Inherit from proNOG: acetyltransferase YdcK	aproNOG	S	1	3	6	NA	NA	0	0	0	0.15625	5	0	0	Cyt predominant
BHRSO03720|ens|geno|NC_005956_423903_423736_-2_CTG_55	NC_005956	423736	423903	-2	CTG	165	1		BH03720	BH03720			ORF_423736..423894_52aa_-2	n to 0	BHRSO06870|ens|geno|NC_005956_809175_809342_+3_CTG_55	55	CytoplasmicMembrane	0	yes	TMH	-	-	-	-	-	-	-	-	-	-	-	TMhelix;Region of a membrane-bound protein predicted to be embedded in the membrane.				0	0	0	NA	NA	0	0	0
BH_RS01810|rso|ens|geno|chemg|prod|NC_005956_423374_423739_+2_ATG_121	NC_005956	423374	423739	+2	ATG	363	1	BH_RS01810	BH03710	BH03710	423374..423739(+)	NC_005956_03820	ORF_423374..423739_121aa_+2	n to n	BH_RS03410|rso|ens|geno|chemg|prod|NC_005956_809704_809339_-1_ATG_121,BHPROD|MQB277_1037937_1038302_+3_ATG_121	121	Unknown	0		CYT	-	-	-	-	-	-	-	-	-	-	-	-				0	0	0	NA	NA	0	0	0
BHORF|NC_005956_423862_424002_+1_TTG_46	NC_005956	423862	424002	+1	TTG	138	1						ORF_423862..424002_46aa_+1		BHORF|NC_005956_809216_809076_-3_TTG_46	46	Unknown	0		CYT	-	-	-	-	-	-	-	-	-	-	-	-				0	1	1	NA	NA	0	0	0
BH_RS01815|rso|ens|geno|+5aa_chemg|prod|NC_005956_423812_424591_+2_ATG_259	NC_005956	423812	424591	+2	ATG	777	1	BH_RS01815	BH03730	BH03730	423797..424591(+)	NC_005956_03830	ORF_423797..424591_264aa_+2	n to n	BH_RS03405|rso|ens|geno|+5aa_chemg|prod|NC_005956_809266_808487_-1_ATG_259,BHPROD|MQB277_1038375_1039154_+3_ATG_259	259	Cytoplasmic	0		CYT	-	-	PF04404;ERF superfamily	-	-	-	-	-	-	-	-	-	Phage-related protein	aproNOG	S	1	7	28	0.466318	0.87438	0.842254	0.385758	2.31455	9.43686	0	4.82366	0.0237378	TM exclusive
BH_RS01820|rso|ens|geno|chemg|prod|NC_005956_424593_425216_+3_ATG_207	NC_005956	424593	425216	+3	ATG	621	1	BH_RS01820	BH03740	BH03740	424593..425216(+)	NC_005956_03840	ORF_424593..425216_207aa_+3	n to n		207	Cytoplasmic	0		CYT	G3DSA:3.90.320.10	-	PF09588;YqaJ-like viral recombinase domain	-	-	-	-	-	-	SSF52980	TIGR03033;phage_rel_nuc: putative phage-type endonuclease	-	exonuclease	aproNOG	L	0	0	0	NA	NA	0	0	0
BH_RS01825_p_-17aa_rso|ens|geno|chemg|prod|NC_005956_425245_425736_+1_ATG_163	NC_005956	425245	425736	+1	ATG	489	1	BH_RS01825(p)	BH03750	BH03750	425245..425736(+)	NC_005956_03850	ORF_425245..425736_163aa_+1	n to p	BH_RS03400|rso|ens|geno|chemg|prod|NC_005956_808485_807862_-2_ATG_207,BHPROD|MQB277_1039156_1039779_+1_ATG_207,BHPROD|MQB277_445589_446212_+2_ATG_207	163	Cytoplasmic	0		CYT	G3DSA:3.90.320.10	-	PF09588;YqaJ-like viral recombinase domain	-	-	-	-	-	-	SSF52980	-	-	exonuclease	aproNOG	L	0	0	0	NA	NA	0	0	0
BH_RS01830|rso|ens|geno|chemg|prod|NC_005956_425809_426012_+1_ATG_67	NC_005956	425809	426012	+1	ATG	201	1	BH_RS01830	BH03760	BH03760	425809..426012(+)	NC_005956_03860	ORF_425809..426012_67aa_+1	n to n	BHPROD|MQB277_446285_446488_+2_ATG_67	67	Unknown	0		CYT	G3DSA:1.10.10.10	-	PF05930;Prophage CP4-57 regulatory protein (AlpA)	-	-	-	-	-	-	SSF46955	-	-	DNA-binding protein	aproNOG	K	1	2	2	NA	NA	9.9925	14.1668	19.4178	0	0	2.55	0	IM exclusive
BHCHEMG|NC_005956_426206_426090_-3_ATG_38	NC_005956	426090	426206	-3	ATG	114	1				426090..426206(-)		ORF_426090..426206_38aa_-3			38	Unknown	0		CYT	-	-	-	-	-	-	-	-	-	-	-	-				0	0	0	NA	NA	18.4379	19.491	54.5114
BH_RS01840|rso|ens|geno|chemg|-2aa_prod|NC_005956_426588_427751_+3_ATG_387	NC_005956	426588	427751	+3	ATG	1161	0	BH_RS01840	BH03780	BH03780	426588..427751(+)	NC_005956_03880	ORF_426588..427751_387aa_+3	n to n	BHPROD_+2aa_orf|MQB277_447064_448227_+1_ATG_387,BHPROD|MQB277_447070_448227_+1_ATG_385	387	Cytoplasmic	0		CYT	G3DSA:3.40.640.10	PTHR21152:SF15,PTHR21152	PF00266;Aminotransferase class-V	PIRSF000525	-	-	-	-	-	SSF53383	TIGR01365;serC_2: phosphoserine aminotransferase	-	Catalyzes the reversible conversion of 3- phosphohydroxypyruvate to phosphoserine and of 3-hydroxy-2-oxo-4- phosphonooxybutanoate to phosphohydroxythreonine (By similarity)	aproNOG	E	1	48	646	-0.0667167	0.916825	3580.14	3396.31	10145.8	0	8.79163	10	2.68949e-11	Cyt predominant
BH_RS01845|rso|ens|geno|chemg|prod|NC_005956_428140_429429_+1_ATG_429	NC_005956	428140	429429	+1	ATG	1287	0	BH_RS01845	BH03790	BH03790	428140..429429(+)	NC_005956_03890	ORF_428140..429429_429aa_+1	n to n	BHPROD|MQB277_448616_449905_+2_ATG_429	429	Cytoplasmic	0		CYT	G3DSA:3.90.170.10,G3DSA:3.40.440.10,G3DSA:1.10.300.10	PTHR11846	PF00709;Adenylosuccinate synthetase	-	-	PS01266;Adenylosuccinate synthetase GTP-binding site.,PS00513;Adenylosuccinate synthetase active site.	-	-	SM00788;Adenylosuccinate synthetase	SSF52540	TIGR00184;purA: adenylosuccinate synthase	-	Plays an important role in the de novo pathway of purine nucleotide biosynthesis	aproNOG	F	1	34	345	0.307252	0.673602	256.642	209.545	798.061	0	9.82883	9.97913	5.86198e-14	Cyt predominant
BH_RS01850|rso|ens|geno|+7aa_chemg|prod|NC_005956_429671_431026_+2_ATG_451	NC_005956	429671	431026	+2	ATG	1353	0	BH_RS01850	BH03800	BH03800	429650..431026(+)	NC_005956_03900	ORF_429671..431026_451aa_+2	n to n	BHPROD|MQB277_450147_451502_+3_ATG_451	451	Unknown	1		CYT	-	-	-	-	-	-	-	-	-	-	-	TMhelix;Region of a membrane-bound protein predicted to be embedded in the membrane.	NA	aproNOG	S	1	22	144	-0.444415	0.681667	2853.12	2609.53	6878.86	0.0262754	0.704477	4.99998	4.23641e-06
BH_RS01855|rso|ens|geno|chemg|prod|NC_005956_432070_431186_-1_ATG_294	NC_005956	431186	432070	-1	ATG	882	0	BH_RS01855	BH03810	BH03810	431186..432070(-)	NC_005956_03910	ORF_431186..432070_294aa_-1	n to n	BHPROD|MQB277_452546_451662_-2_ATG_294	294	Cytoplasmic	0		CYT	G3DSA:1.10.10.10,G3DSA:1.10.601.10	PTHR30376	PF04545;Sigma-70, region 4,PF04542;Sigma-70 region 2,PF00140;Sigma-70 factor, region 1.2	PIRSF000770	PR00046;Major sigma-70 factor signature	PS00715;Sigma-70 factors family signature 1.,PS00716;Sigma-70 factors family signature 2.	-	-	-	SSF88659,SSF88946	TIGR02937;sigma70-ECF: RNA polymerase sigma factor, sigma-70 family,TIGR02392;rpoH_proteo: alternative sigma factor RpoH	-	Sigma factors are initiation factors that promote the attachment of RNA polymerase to specific initiation sites and are then released (By similarity)	aproNOG	K	1	14	93	0.99975	0.425578	1068.5	1621.49	2219.66	0.438651	0.26626	4.9998	2.12142e-05
BH_RS01860|rso|ens|geno|chemg|prod|NC_005956_433232_432228_-3_ATG_334	NC_005956	432228	433232	-3	ATG	1002	0	BH_RS01860	BH03820	BH03820	432228..433232(-)	NC_005956_03920	ORF_432228..433232_334aa_-3	n to n	BHPROD|MQB277_453708_452704_-1_ATG_334	334	Cytoplasmic	0		CYT	G3DSA:3.10.290.10	PTHR10436:SF86,PTHR10436	PF00849;RNA pseudouridylate synthase,PF01479;S4 domain	-	-	PS01129;Rlu family of pseudouridine synthase signature.	PS50889;S4 RNA-binding domain profile.	-	SM00363;S4 RNA-binding domain	SSF55120,SSF55174	TIGR00005;rluA_subfam: pseudouridine synthase, RluA family	-	Pseudouridine synthase	aproNOG	J	1	15	59	-0.0780025	0.987868	938.304	1467.92	2032.9	9.96829	0	4.97235	0.00696837	TM exclusive
BHCHEMG|NC_005956_432943_432716_-1_CTG_75	NC_005956	432716	432943	-1	CTG	225	1				432716..432943(-)		ORF_432716..433021_101aa_-1			75	CytoplasmicMembrane	1		TMH	-	-	-	-	-	-	-	-	-	-	-	TMhelix;Region of a membrane-bound protein predicted to be embedded in the membrane.				0	0	0	NA	NA	0	0	0
BH_RS01865|rso|ens|geno|+76aa_chemg|prod|NC_005956_434696_433266_-3_ATG_476	NC_005956	433266	434696	-3	ATG	1428	0	BH_RS01865	BH03830	BH03830	433266..434924(-)	NC_005956_03930	ORF_433266..434747_493aa_-3	n to n		476	Cytoplasmic	0		CYT	G3DSA:3.40.309.10,G3DSA:3.40.605.10	PTHR11699:SF149,PTHR11699	PF00171;Aldehyde dehydrogenase family	-	-	PS00070;Aldehyde dehydrogenases cysteine active site.	-	-	-	SSF53720	-	-	Aldehyde dehydrogenase	aproNOG	C	1	33	344	-0.342685	0.64461	1595.76	1891.58	4605.58	0	10	8.59297	0.615086	Cyt predominant
BHCHEMG|NC_005956_436437_436273_-2_TTG_54	NC_005956	436273	436437	-2	TTG	162	0				436273..436437(-)		ORF_436273..436425_50aa_-2			54	Unknown	0		CYT	-	-	-	-	-	-	-	-	-	-	-	-				0	0	0	NA	NA	0	0	0
BH_RS01870|rso|ens|geno|+4aa_chemg|prod|NC_005956_435125_437650_+2_ATG_841	NC_005956	435125	437650	+2	ATG	2523	0	BH_RS01870	BH03840	BH03840	435113..437650(+)	NC_005956_03940	ORF_435125..437650_841aa_+2	n to n	BHPROD|MQB277_455601_458126_+3_ATG_841	841	CytoplasmicMembrane	0		CYT	G3DSA:3.40.50.300	PTHR22683,PTHR22683:SF41	PF09397;Ftsk gamma domain,PF01580;FtsK/SpoIIIE family	-	-	-	PS50901;FtsK domain profile.	-	SM00382;ATPases associated with a variety of cellular activities,SM00843;Target=BH_RS01870|rso|ens|geno|+4aa_chemg|prod|NC_005956_435125_437650_+2_ATG_841 775 840	SSF46785,SSF52540	-	-	cell division protein FtsK	aproNOG	D	1	18	71	-0.595083	0.704974	4244.17	6268.06	8138.61	9.99821	0	4.98355	0.00444524	TM exclusive
BH_RS01875|+6aa_geno|NC_005956_438000_438221_+3_TTG_73	NC_005956	438000	438221	+3	TTG	219	1	BH_RS01875		BARHE0441			ORF_438039..438221_60aa_+3	0 to n		73	Unknown	0		CYT	-	-	-	-	-	-	-	-	-	-	-	-				0	0	0	NA	NA	31.4562	50.2857	73.6327
BHGENO0442|NC_005956_438218_438397_+2_TTG_59	NC_005956	438218	438397	+2	TTG	177	1			BARHE0442			ORF_438236..438397_53aa_+2			59	Unknown	1		CYT	-	-	-	-	-	-	-	-	-	-	-	TMhelix;Region of a membrane-bound protein predicted to be embedded in the membrane.				0	0	0	NA	NA	5.04824	2.89099	10.2499
BHGENO0443|NC_005956_438381_438539_+3_TTG_52	NC_005956	438381	438539	+3	TTG	156	1			BARHE0443			ORF_438477..438539_20aa_+3			52	Unknown	0		CYT	-	-	-	-	-	-	-	-	-	-	-	-				0	0	0	NA	NA	394.694	436.93	801.385
BH_RS01880|rso|ens|geno|+2aa_chemg|prod|NC_005956_439084_440397_+1_ATG_437	NC_005956	439084	440397	+1	ATG	1311	0	BH_RS01880	BH03850	BH03850	439078..440397(+)	NC_005956_03950	ORF_439084..440397_437aa_+1	n to n	BHPROD|MQB277_459560_460873_+2_ATG_437	437	CytoplasmicMembrane	0		CYT	G3DSA:1.10.287.130,G3DSA:3.30.565.10,G3DSA:3.30.450.20	PTHR24423	PF02518;Histidine kinase-, DNA gyrase B-, and HSP90-like ATPase,PF00512;His Kinase A (phospho-acceptor) domain,PF13426;PAS domain	-	PR00344;Bacterial sensor protein C-terminal signature	-	PS50109;Histidine kinase domain profile.,PS50112;PAS repeat profile.	-	SM00091;PAS domain,SM00387;Histidine kinase-like ATPases,SM00388;His Kinase A (phosphoacceptor) domain	SSF47384,SSF55874,SSF55785	TIGR00229;sensory_box: PAS domain S-box protein	-	PAS PAC sensor Signal transduction histidine kinase	aproNOG	T	1	22	132	0.597563	0.578973	843.006	760.655	1787.46	10	0	4.99993	1.65698e-05	TM exclusive
BH_RS01885|rso|ens|geno|chemg|prod|NC_005956_440826_440413_-2_ATG_137	NC_005956	440413	440826	-2	ATG	411	0	BH_RS01885	BH03860	BH03860	440413..440826(-)	NC_005956_03960	ORF_440413..440826_137aa_-2	n to n	BHPROD|MQB277_461302_460889_-3_ATG_137	137	CytoplasmicMembrane	3		TMH	-	PTHR30266,PTHR30266:SF2	PF01741;Large-conductance mechanosensitive channel, MscL	-	PR01264;Bacterial mechano-sensitive ion channel signature	PS01327;Large-conductance mechanosensitive channels mscL family signature.	-	-	-	SSF81330	TIGR00220;mscL: large conductance mechanosensitive channel protein	TMhelix;Region of a membrane-bound protein predicted to be embedded in the membrane.	Channel that opens in response to stretch forces in the membrane lipid bilayer. May participate in the regulation of osmotic pressure changes within the cell (By similarity)	aproNOG	M	1	15	197	0.686444	0.442155	4111.56	3332.87	7886.06	10	0	9.8898	0.0545529	IM predominant
BH_RS01890|rso|ens|geno|+7aa_chemg|prod|NC_005956_441400_442488_+1_ATG_362	NC_005956	441400	442488	+1	ATG	1086	0	BH_RS01890	BH03870	BH03870	441379..442488(+)	NC_005956_03970	ORF_441400..442488_362aa_+1	n to n	BHPROD|MQB277_461876_462964_+2_ATG_362	362	CytoplasmicMembrane	0		CYT	G3DSA:3.20.20.70	PTHR11938	PF01180;Dihydroorotate dehydrogenase	-	-	PS00912;Dihydroorotate dehydrogenase signature 2.,PS00911;Dihydroorotate dehydrogenase signature 1.	-	-	-	SSF51395	TIGR01036;pyrD_sub2: dihydroorotate dehydrogenase (fumarate)	-	Catalyzes the conversion of dihydroorotate to orotate with quinone as electron acceptor (By similarity)	aproNOG	F	1	38	436	-0.348842	0.60859	351.741	431.172	793.594	1.81457	4.81799e-10	9.9985	0.000726339
BHCHEMG|NC_005956_442534_442716_+1_TTG_60	NC_005956	442534	442716	+1	TTG	180	1				442534..442716(+)		ORF_442558..442716_52aa_+1			60	Unknown	1		CYT	-	-	-	-	-	-	-	-	-	-	-	-				0	0	0	NA	NA	51.3359	44.9917	126.707
BH_RS01900|rso|ens|geno|chemg|prod|NC_005956_442876_444303_+1_ATG_475	NC_005956	442876	444303	+1	ATG	1425	0	BH_RS01900	BH03890	BH03890	442876..444303(+)	NC_005956_03990	ORF_442876..444303_475aa_+1	n to n	BHPROD|MQB277_463352_464779_+2_ATG_475	475	Cytoplasmic	0		CYT	G3DSA:3.30.590.10,G3DSA:3.10.20.70	PTHR20852:SF7,PTHR20852	PF00120;Glutamine synthetase, catalytic domain	-	-	PS00181;Glutamine synthetase putative ATP-binding region signature.	-	-	-	SSF55931,SSF54368	-	-	glutamine synthetase	aproNOG	E	1	29	283	0.251813	0.751274	546.987	531.152	1287.44	9.99995	0	9.64526	0.0598626	IM predominant
BH_RS01905|rso|ens|geno|chemg|prod|NC_005956_444315_445598_+3_ATG_427	NC_005956	444315	445598	+3	ATG	1281	0	BH_RS01905	BH03900	BH03900	444315..445598(+)	NC_005956_04000	ORF_444315..445598_427aa_+3	n to n	BHPROD|MQB277_464791_466074_+1_ATG_427	427	Cytoplasmic	0		CYT	G3DSA:3.50.50.60	PTHR13847,PTHR13847:SF44	PF01266;FAD dependent oxidoreductase	-	-	-	-	-	-	SSF51905	-	-	oxidoreductase	aproNOG	C	1	33	249	-0.0849239	0.929273	601.266	670.461	1432.86	10	0	7.34279	1.11582e-09	IM predominant
BH_RS01910|rso|ens|geno|+8aa_chemg|prod|NC_005956_445715_447190_+2_ATG_491	NC_005956	445715	447190	+2	ATG	1473	0	BH_RS01910	BH03910	BH03910	445691..447190(+)	NC_005956_04010	ORF_445715..447190_491aa_+2	n to n	BHPROD|MQB277_466191_467666_+3_ATG_491	491	Cytoplasmic	0		CYT	G3DSA:3.40.50.720,G3DSA:3.30.360.10	PTHR23429:SF5,PTHR23429	PF02781;Glucose-6-phosphate dehydrogenase, C-terminal domain,PF00479;Glucose-6-phosphate dehydrogenase, NAD binding domain	PIRSF000110	PR00079;Glucose-6-phosphate dehydrogenase signature	PS00069;Glucose-6-phosphate dehydrogenase active site.	-	-	-	SSF55347,SSF51735	TIGR00871;zwf: glucose-6-phosphate dehydrogenase	-	glucose-6-phosphate 1-dehydrogenase	aproNOG	G	1	29	161	0.268872	0.792732	574.111	593.337	1395.51	1.77636e-15	9.87603	7.34279	0	Cyt predominant
BH_RS01915|rso|ens|geno|+14aa_chemg|prod|NC_005956_447201_447959_+3_ATG_252	NC_005956	447201	447959	+3	ATG	756	0	BH_RS01915	BH03920	BH03920	447159..447959(+)	NC_005956_04020	ORF_447162..447959_265aa_+3	n to n	BHPROD|MQB277_467677_468435_+1_ATG_252	252	Cytoplasmic	0		CYT	G3DSA:3.40.50.1360	PTHR11054	PF01182;Glucosamine-6-phosphate isomerases/6-phosphogluconolactonase	-	-	-	-	-	-	SSF100950	TIGR01198;pgl: 6-phosphogluconolactonase	-	6-phosphogluconolactonase EC 3.1.1.31	aproNOG	G	1	19	113	0.748089	0.515654	283.298	421.616	614.4	1.01056e-05	5.48921	5.79187	2.1648	Cyt predominant
BHCHEMG|NC_005956_448678_448421_-1_ATG_85	NC_005956	448421	448678	-1	ATG	255	1				448421..448678(-)		ORF_448421..448678_85aa_-1			85	Unknown	0		CYT	-	-	-	-	-	-	-	-	-	-	-	-				0	0	0	NA	NA	0	0	0
BH_RS01920|rso|ens|geno|+6aa_chemg|prod|NC_005956_448006_449829_+1_ATG_607	NC_005956	448006	449829	+1	ATG	1821	0	BH_RS01920	BH03930	BH03930	447988..449829(+)	NC_005956_04030	ORF_447988..449829_613aa_+1	n to n	BHPROD|MQB277_468482_470305_+2_ATG_607	607	Cytoplasmic	0		CYT	-	PTHR21000,PTHR21000:SF9	PF00920;Dehydratase family	-	-	PS00887;Dihydroxy-acid and 6-phosphogluconate dehydratases signature 2.,PS00886;Dihydroxy-acid and 6-phosphogluconate dehydratases signature 1.	-	-	-	SSF52016,SSF143975	TIGR01196;edd: phosphogluconate dehydratase	-	phosphogluconate dehydratase	aproNOG	G	1	13	52	0.243926	0.908384	3835.42	5861.88	8147.63	9.95772	0	4.98787	0.00237303	TM exclusive
BH_RS01925|rso|ens|geno|chemg|prod|NC_005956_450785_449886_-3_ATG_299	NC_005956	449886	450785	-3	ATG	897	0	BH_RS01925	BH03940	BH03940	449886..450785(-)	NC_005956_04040	ORF_449886..450785_299aa_-3	n to n	BHPROD|MQB277_471261_470362_-1_ATG_299	299	Cytoplasmic	0		CYT	G3DSA:3.40.192.10,G3DSA:3.40.50.720	PTHR10025	PF02882;Tetrahydrofolate dehydrogenase/cyclohydrolase, NAD(P)-binding domain,PF00763;Tetrahydrofolate dehydrogenase/cyclohydrolase, catalytic domain	-	PR00085;Tetrahydrofolate dehydrogenase/cyclohydrolase family signature	PS00766;Tetrahydrofolate dehydrogenase/cyclohydrolase signature 1.,PS00767;Tetrahydrofolate dehydrogenase/cyclohydrolase signature 2.	-	-	-	SSF53223,SSF51735	-	-	Catalyzes the oxidation of 5,10- methylenetetrahydrofolate to 5,10-methenyltetrahydrofolate and then the hydrolysis of 5,10-methenyltetrahydrofolate to 10- formyltetrahydrofolate (By similarity)	aproNOG	H	1	34	482	-0.435985	0.507104	351.977	354.982	1022.25	1.77636e-15	0.927889	9.99953	1.39622e-12
BHCHEMG|NC_005956_451981_451802_-1_TTG_59	NC_005956	451802	451981	-1	TTG	177	1				451802..451981(-)		ORF_451802..451978_58aa_-1			59	Unknown	0		CYT	-	-	-	-	-	-	-	-	-	-	-	-				0	0	0	NA	NA	0	0	0
BHCHEMG|NC_005956_452523_452392_-2_CTG_43	NC_005956	452392	452523	-2	CTG	129	1				452392..452523(-)		ORF_452392..452502_36aa_-2			43	Unknown	0		CYT	-	-	-	-	-	-	-	-	-	-	-	-				0	0	0	NA	NA	0	0	0
BH_RS01930|rso|ens|geno|chemg|prod|NC_005956_451106_452980_+2_GTG_624	NC_005956	451106	452980	+2	GTG	1872	0	BH_RS01930	BH03950	BH03950	451106..452980(+)	NC_005956_04050	ORF_451340..452980_546aa_+2	n to n	BHRSO10690_p|ens_p|NC_005956_1173626_1173909_+2_AAC_94,BHPROD|MQB277_471582_473456_+3_GTG_624	624	CytoplasmicMembrane	1		TMH	-	-	PF13502;AsmA-like C-terminal region,PF05170;AsmA family	-	-	-	-	-	-	-	-	TMhelix;Region of a membrane-bound protein predicted to be embedded in the membrane.	AsmA family	aproNOG	M	1	30	189	-0.234122	0.811176	148.093	181.837	309.429	10	0	5	8.0527e-09	TM exclusive
BHGENO0455|+24aa_chemg|prod|NC_005956_453228_453085_-2_ATG_47	NC_005956	453085	453228	-2	ATG	141	1			BARHE0455	453085..453300(-)	NC_005956_04060	ORF_453085..453228_47aa_-2		BHPROD|MQB277_473704_473561_-3_ATG_47	47	Unknown	0	yes	SpI	-	-	-	-	-	-	-	-	-	-	-	TMhelix;Region of a membrane-bound protein predicted to be embedded in the membrane.				1	1	3	NA	NA	13.7973	13.0943	34.3725	2.5	0	0	0	IM exclusive
BHCHEMG|NC_005956_453128_453304_+2_GTG_58	NC_005956	453128	453304	+2	GTG	174	1				453128..453304(+)		ORF_453170..453304_44aa_+2			58	Unknown	1		CYT	-	-	-	-	-	-	-	-	-	-	-	-				0	0	0	NA	NA	32.7961	31.1563	65.0187
BHCHEMG|NC_005956_454016_453783_-3_ATG_77	NC_005956	453783	454016	-3	ATG	231	1				453783..454016(-)		ORF_453783..454016_77aa_-3			77	Unknown	0		CYT	-	-	-	-	-	-	-	-	-	-	-	-				0	0	0	NA	NA	0	0	0
BH_RS01935|rso|ens|geno|+19aa_chemg|prod|NC_005956_453436_454179_+1_ATG_247	NC_005956	453436	454179	+1	ATG	741	0	BH_RS01935	BH03960	BH03960	453379..454179(+)	NC_005956_04070	ORF_453436..454179_247aa_+1	n to n	BHPROD|MQB277_473912_474655_+2_ATG_247	247	Cytoplasmic	0		CYT	G3DSA:3.40.1280.10	PTHR30027:SF3,PTHR30027	PF04452;RNA methyltransferase	PIRSF015601	-	-	-	-	-	SSF88697,SSF75217	TIGR00046;TIGR00046: RNA methyltransferase, RsmE family	-	Specifically methylates the N3 position of the uracil ring of uridine 1498 (m3U1498) in 16S rRNA. Acts on the fully assembled 30S ribosomal subunit (By similarity)	aproNOG	S	1	14	128	-0.318943	0.785662	121.557	119.176	251.327	10	0	4.99824	0.000475925	TM exclusive
BH_RS01940|rso|ens|geno|chemg|prod|NC_005956_454248_455621_+3_ATG_457	NC_005956	454248	455621	+3	ATG	1371	0	BH_RS01940	BH03970	BH03970	454248..455621(+)	NC_005956_04080	ORF_454248..455621_457aa_+3	n to n		457	Periplasmic	0		CYT	-	-	PF04107;Glutamate-cysteine ligase family 2(GCS2)	PIRSF017901	-	-	-	-	-	SSF55931	TIGR01436;glu_cys_lig_pln: glutamate--cysteine ligase	-	Glutamate--cysteine ligase	aproNOG	H	1	16	95	-0.2464	0.863821	343.955	487.352	762.287	3.23475e-11	9.95463	5.93715	0.00339512	Cyt predominant
BH_RS01945|rso|ens|geno|chemg|prod|NC_005956_456438_457793_+3_ATG_451	NC_005956	456438	457793	+3	ATG	1353	1	BH_RS01945	BH03980	BH03980	456438..457793(+)	NC_005956_04090	ORF_456438..457793_451aa_+3	n to n	BHPROD|MQB277_476914_478269_+1_ATG_451	451	CytoplasmicMembrane	11		TMH	G3DSA:1.10.3860.10	PTHR11958,PTHR11958:SF5	PF00375;Sodium:dicarboxylate symporter family	-	PR00173;Glutamate-aspartate symporter signature	-	-	-	-	SSF118215	-	TMhelix;Region of a membrane-bound protein predicted to be embedded in the membrane.	Sodium:dicarboxylate symporter family	aproNOG	S	1	14	228	-0.73804	0.397456	3373	3708.73	7467.43	10	0	6.2226	3.34919	TM exclusive
BH_RS01950|-33aa_rso|chemg|prod|NC_005956_458693_457809_-3_ATG_294	NC_005956	457809	458693	-3	ATG	882	0	BH_RS01950	BH03990	BH03990	457809..458693(-)	NC_005956_04100	ORF_457809..458693_294aa_-3	n to n	BHPROD|MQB277_479169_478285_-1_ATG_294	294	Unknown	0		CYT	G3DSA:3.40.50.150	PTHR13090,PTHR13090:SF2	PF08241;Methyltransferase domain	-	-	-	-	-	-	SSF53335	-	-	Methyltransferase	aproNOG	Q	1	6	18	0.466318	0.919008	31.968	34.0583	78.6516	7.63912	0.00488281	4.15965	0	IM exclusive
BHCHEMG|NC_005956_458065_457832_-1_ATG_77	NC_005956	457832	458065	-1	ATG	231	1				457832..458065(-)		ORF_457832..458065_77aa_-1			77	CytoplasmicMembrane	1		CYT	-	-	-	-	-	-	-	-	-	-	-	TMhelix;Region of a membrane-bound protein predicted to be embedded in the membrane.	Membrane	bactNOG	EG	0	0	0	NA	NA	0	0	0
BH_RS01955|+1aa_rso|NC_005956_458879_459664_+2_ATG_261	NC_005956	458879	459664	+2	ATG	783	0	BH_RS01955	BH04000	BH04000	458876..459664(+)	NC_005956_04110	ORF_458876..459664_262aa_+2	n to n	BHPROD|MQB277_479352_480140_+3_ATG_262	261	Unknown	0		CYT	G3DSA:3.40.50.2020	PTHR11907:SF9,PTHR11907	PF00156;Phosphoribosyl transferase domain	-	-	-	-	-	-	SSF53271	-	-	Competence protein f	aproNOG	S	1	3	11	-0.948719	0.889779	1208.91	2407.02	2393.04	4.375	0	2.68584	0.980016	TM exclusive
BH_RS01960|rso|ens|geno|+17aa_chemg|prod|NC_005956_459712_459969_+1_ATG_85	NC_005956	459712	459969	+1	ATG	255	0	BH_RS01960	BH04010	BH04010	459661..459969(+)	NC_005956_04120	ORF_459712..459969_85aa_+1	n to n	BHPROD|MQB277_480188_480445_+2_ATG_85	85	Unknown	0		CYT	G3DSA:3.40.30.10	PTHR10168	PF00462;Glutaredoxin	-	PR00160;Glutaredoxin signature	PS00195;Glutaredoxin active site.	PS51354;Glutaredoxin domain profile.	-	-	SSF52833	TIGR02181;GRX_bact: glutaredoxin 3	-	Glutaredoxin	aproNOG	O	1	31	511	-0.290256	0.653941	92.9333	158.712	164.956	0	10	6.24198	2.7567	Cyt predominant
BH_RS01965|rso|ens|geno|+3aa_chemg|prod|NC_005956_460735_459992_-1_ATG_247	NC_005956	459992	460735	-1	ATG	741	0	BH_RS01965	BH04020	BH04020	459992..460744(-)	NC_005956_04130	ORF_459992..460744_250aa_-1	n to n	BHPROD_+3aa_orf|MQB277_481220_480468_-2_ATG_250,BHPROD|MQB277_481211_480468_-2_ATG_247	247	Cytoplasmic	0		CYT	G3DSA:3.40.50.150	PTHR23134:SF4,PTHR23134	PF13489;Methyltransferase domain	-	-	-	-	-	-	SSF53335	TIGR01983;UbiG: 3-demethylubiquinone-9 3-O-methyltransferase	-	Non-specific O-methyltransferase that catalyzes the 2 O- methylation steps in the ubiquinone biosynthetic pathway (By similarity)	aproNOG	H	1	26	592	-0.600451	0.331129	197.961	289.632	419.42	0.000729811	7.84055e-09	10	5.46375e-10
BH_RS01970|rso|ens|geno|+14aa_chemg|prod|NC_005956_460929_462185_+3_ATG_418	NC_005956	460929	462185	+3	ATG	1254	0	BH_RS01970	BH04030	BH04030	460887..462185(+)	NC_005956_04140	ORF_460929..462185_418aa_+3	n to n	BHPROD|MQB277_481405_482661_+1_ATG_418	418	Cytoplasmic	0		CYT	G3DSA:3.40.1160.10,G3DSA:3.30.70.260	PTHR21499,PTHR21499:SF3	PF01842;ACT domain,PF00696;Amino acid kinase family,PF13840;ACT domain	PIRSF000726	-	PS00324;Aspartokinase signature.	PS51671;ACT domain profile.	-	-	SSF53633,SSF55021	TIGR00656;asp_kin_monofn: aspartate kinase, monofunctional class,TIGR00657;asp_kinases: aspartate kinase	-	Aspartokinase	aproNOG	E	1	29	389	0.399549	0.564547	450.85	551.583	1156.92	0	7.31996	9.99621	0.000349358	Cyt predominant
BHGENO0464|NC_005956_463060_462944_-1_TTG_38	NC_005956	462944	463060	-1	TTG	114	1			BARHE0464			ORF_462944..463018_24aa_-1			38	Unknown	0		CYT	-	-	-	-	-	-	-	-	-	-	-	-				0	0	0	NA	NA	163.762	219.673	307.102
BH_RS01975|rso|ens|geno|+4aa_chemg|prod|NC_005956_464469_463108_-2_ATG_453	NC_005956	463108	464469	-2	ATG	1359	0	BH_RS01975	BH04040	BH04040	463108..464481(-)	NC_005956_04150	ORF_463108..464469_453aa_-2	n to n	BHPROD|MQB277_484945_483584_-3_ATG_453	453	CytoplasmicMembrane	12		CYT	G3DSA:1.20.1530.10	PTHR30341:SF0,PTHR30341	PF06965;Na+/H+ antiporter 1	-	-	-	-	-	-	-	TIGR00773;NhaA: Na+/H+ antiporter NhaA	TMhelix;Region of a membrane-bound protein predicted to be embedded in the membrane.	) H( ) antiporter that extrudes sodium in exchange for external protons (By similarity)	aproNOG	P	1	23	514	-0.352075	0.584939	883.857	1221.74	1788.73	10	0	9.42502	0.407714	IM predominant
BHORF|NC_005956_463151_463327_+2_ATG_58	NC_005956	463151	463327	+2	ATG	174	1						ORF_463151..463327_58aa_+2			58	Unknown	0		CYT	-	-	-	-	-	-	-	-	-	-	-	-				0	1	1	NA	NA	0	0	0
BH_RS01980|rso|ens|geno|+22aa_chemg|+8aa_prod|NC_005956_466312_464624_-1_ATG_562	NC_005956	464624	466312	-1	ATG	1686	1	BH_RS01980	BH04050	BH04050	464624..466378(-)	NC_005956_04160	ORF_464624..466336_570aa_-1	n to n	BHPROD|MQB277_486812_485100_-2_ATG_570	562	Unknown	1		TMH	-	-	-	-	-	-	-	-	-	-	-	TMhelix;Region of a membrane-bound protein predicted to be embedded in the membrane.	NA	aproNOG	S	1	62	830	-0.471398	0.401278	506.894	536.041	932.259	10	0	9.99752	0.000202419	IM predominant
BHCHEMG|NC_005956_466017_466196_+3_GTG_59	NC_005956	466017	466196	+3	GTG	177	1				466017..466196(+)		ORF_466053..466196_47aa_+3			59	Unknown	0		CYT	-	-	-	-	-	-	-	-	-	-	-	-				0	0	0	NA	NA	0	0	0
BHCHEMG|NC_005956_467649_467425_-2_CTG_74	NC_005956	467425	467649	-2	CTG	222	1				467425..467649(-)		ORF_467425..467619_64aa_-2			74	Unknown	0		CYT	-	-	-	-	-	-	-	-	-	-	-	-				0	0	0	NA	NA	0	0	0
BH_RS01985|rso|ens|geno|+3aa_chemg|prod|NC_005956_466679_468451_+2_ATG_590	NC_005956	466679	468451	+2	ATG	1770	0	BH_RS01985	BH04060	BH04060	466670..468451(+)	NC_005956_04170	ORF_466670..468451_593aa_+2	n to n		590	CytoplasmicMembrane	12		TMH	G3DSA:3.30.70.1450	PTHR10283:SF79,PTHR10283	PF02080;TrkA-C domain,PF03600;Citrate transporter	-	-	-	PS51202;RCK C-terminal domain profile.	-	-	SSF116726	-	TMhelix;Region of a membrane-bound protein predicted to be embedded in the membrane.	domain protein	aproNOG	P	1	16	75	-0.363757	0.8185	899.986	1077.72	1875.98	9.68324	0	5	4.26916e-10	TM exclusive
BHGENO0468|NC_005956_468641_468784_+2_ATG_47	NC_005956	468641	468784	+2	ATG	141	1			BARHE0468			ORF_468629..468784_51aa_+2			47	Unknown	0		CYT	-	-	-	-	-	-	-	-	-	-	-	-				0	0	0	NA	NA	30.1754	37.8927	58.4447
BH_RS01990|rso|ens|geno|chemg|prod|NC_005956_469115_469786_+2_ATG_223	NC_005956	469115	469786	+2	ATG	669	0	BH_RS01990	BH04070	BH04070	469115..469786(+)	NC_005956_04180	ORF_469115..469786_223aa_+2	n to n	BHPROD|MQB277_489591_490262_+3_ATG_223	223	Cytoplasmic	1		TMH	-	-	PF09976;Tetratricopeptide repeat	-	-	-	-	-	-	-	-	TMhelix;Region of a membrane-bound protein predicted to be embedded in the membrane.	Pfam:DUF2133	aproNOG	S	1	56	1221	-0.707449	0.17043	178.938	206.847	424.648	10	0	10	0	IM predominant
BHCHEMG|NC_005956_470518_470384_-1_ATG_44	NC_005956	470384	470518	-1	ATG	132	0				470384..470518(-)		ORF_470384..470518_44aa_-1			44	Unknown	0		CYT	-	-	-	-	-	-	-	-	-	-	-	-				0	0	0	NA	NA	0	0	0
BHCHEMG|NC_005956_470380_470466_+1_ATG_28	NC_005956	470380	470466	+1	ATG	84	1				470380..470466(+)		ORF_470380..470466_28aa_+1			28	Unknown	0		CYT	-	-	-	-	-	-	-	-	-	-	-	-				0	0	0	NA	NA	0	0	0
BH_RS01995|rso|ens|geno|+15aa_chemg|prod|NC_005956_469791_471218_+3_ATG_475	NC_005956	469791	471218	+3	ATG	1425	0	BH_RS01995	BH04080	BH04080	469746..471218(+)	NC_005956_04190	ORF_469791..471218_475aa_+3	n to n	BHPROD|MQB277_490267_491694_+1_ATG_475	475	CytoplasmicMembrane	0		CYT	G3DSA:3.30.300.20,G3DSA:3.40.50.300	PTHR11649,PTHR11649:SF5	PF14714;KH-domain-like of EngA bacterial GTPase enzymes, C-terminal,PF01926;50S ribosome-binding GTPase	PIRSF006485	-	-	PS51712;EngA-type guanine nucleotide-binding (G) domain profile.	-	-	SSF52540	TIGR03594;GTPase_EngA: ribosome-associated GTPase EngA,TIGR00231;small_GTP: small GTP-binding protein domain	-	GTPase that plays an essential role in the late steps of ribosome biogenesis (By similarity)	aproNOG	S	1	36	246	-0.0311817	0.982414	146.009	149.081	414.087	5.36886	9.41467e-08	0.000135954	9.99967	OM predominant
BHCHEMG|NC_005956_471499_471630_+1_GTG_43	NC_005956	471499	471630	+1	GTG	129	1				471499..471630(+)		ORF_471538..471630_30aa_+1			43	Unknown	0		CYT	-	-	-	-	-	-	-	-	-	-	-	-				0	0	0	NA	NA	37.5283	71.6806	68.8696
BHGENO0471|NC_005956_471660_471863_+3_TTG_67	NC_005956	471660	471863	+3	TTG	201	1			BARHE0471			ORF_471684..471863_59aa_+3			67	CytoplasmicMembrane	1		CYT	-	-	-	-	-	-	-	-	-	-	-	TMhelix;Region of a membrane-bound protein predicted to be embedded in the membrane.				0	0	0	NA	NA	7.65596	7.21756	22.5676
BHCHEMG|NC_005956_472135_472311_+1_GTG_58	NC_005956	472135	472311	+1	GTG	174	1	BH_RS02000(p)	BH04090(p)	BH04090(p)	472135..472311(+)		ORF_472141..472311_56aa_+1	p to p		58	Unknown	0		CYT	-	-	-	-	-	-	-	-	-	-	-	-				0	0	0	NA	NA	9.83317	13.0095	17.3459
BHGENOBH04090_fCDS1_p_+12aa_prod|NC_005956_472223_472438_+2_ATG_71	NC_005956	472223	472438	+2	ATG	213	0	BH_RS02000(p)	BH04090(p)	BH04090(p)		NC_005956_04200	ORF_472223..472438_71aa_+2	p to p	BHPROD|MQB277_492699_492914_+3_ATG_71	71	Unknown	0		CYT	-	-	-	-	-	-	-	-	-	-	-	-	Integrase	aproNOG	L	0	0	0	NA	NA	0	0	0
BHRSO04090_p|ens_p|-53aa_geno_fCDS2_p|NC_005956_472259_472571_+2_CGC_104	NC_005956	472259	472571	+2	CGC	310	0	BH_RS02000(p)	BH04090(p)	BH04090-2(p)				p to p		104	Unknown	0		CYT	-	-	-	-	-	-	-	-	-	-	-	-	Integrase	aproNOG	L	0	0	0	NA	NA	10.6499	26.1491	22.6106
BHGENO0473|NC_005956_472569_472628_+3_ATG_19	NC_005956	472569	472628	+3	ATG	57	6			BARHE0473			ORF_472569..472628_19aa_+3			19	Unknown	0		CYT	-	-	-	-	-	-	-	-	-	-	-	-				0	0	0	NA	NA	7.11434	5.38776	14.3673
BH_RS02005|rso|ens|geno|+10aa_chemg|prod|NC_005956_472793_473218_+2_ATG_141	NC_005956	472793	473218	+2	ATG	423	0	BH_RS02005	BH04100	BH04100	472763..473218(+)	NC_005956_04210	ORF_472793..473218_141aa_+2	n to n	BHPROD|MQB277_493269_493694_+3_ATG_141	141	Unknown	2		CYT	-	-	PF09527;Putative F0F1-ATPase subunit (ATPase_gene1)	-	-	-	-	-	-	-	-	TMhelix;Region of a membrane-bound protein predicted to be embedded in the membrane.	atp synthase	aproNOG	S	1	8	90	-0.0521491	0.989624	283.609	268.125	617.375	9.99996	1.77636e-15	5	0	IM exclusive
BH_RS02010|rso|ens|geno|-56aa_chemg|prod|NC_005956_473226_473984_+3_GTG_252	NC_005956	473226	473984	+3	GTG	756	0	BH_RS02010	BH04110	BH04110	473394..473984(+)	NC_005956_04220	ORF_473298..473984_228aa_+3	n to n	BHPROD|MQB277_493702_494460_+1_GTG_252	252	CytoplasmicMembrane	6		CYT	G3DSA:1.20.120.220	PTHR11410,PTHR11410:SF0	PF00119;ATP synthase A chain	-	PR00123;ATP synthase A subunit signature	PS00449;ATP synthase a subunit signature.	-	-	-	SSF81336	TIGR01131;ATP_synt_6_or_A: ATP synthase F0, A subunit	TMhelix;Region of a membrane-bound protein predicted to be embedded in the membrane.	it plays a direct role in the translocation of protons across the membrane (By similarity)	aproNOG	C	1	14	217	-0.573759	0.519432	192.015	173.021	487.263	9.89359	1.5806e-11	9.9801	0.00205568	IM predominant
BH_RS02015|rso|ens|geno|prod|NC_005956_474043_474273_+1_ATG_76	NC_005956	474043	474273	+1	ATG	228	0	BH_RS02015	BH04120	BH04120		NC_005956_04230	ORF_474043..474273_76aa_+1	n to n	BHPROD|MQB277_494519_494749_+2_ATG_76	76	CytoplasmicMembrane	2		TMH	G3DSA:1.20.20.10	PTHR10031:SF8,PTHR10031	PF00137;ATP synthase subunit C	-	PR00124;ATP synthase C subunit signature	-	-	-	-	SSF81333	-	TMhelix;Region of a membrane-bound protein predicted to be embedded in the membrane.	ATP synthase, subunit C	aproNOG	C	1	21	375	-0.150777	0.838677	461.115	359.015	1231.45	10	0	9.99861	0.000107574	TM exclusive
BH_RS02020|rso|ens|geno|chemg|prod|NC_005956_474416_474982_+2_ATG_188	NC_005956	474416	474982	+2	ATG	564	0	BH_RS02020	BH04130	BH04130	474416..474982(+)	NC_005956_04240	ORF_474416..474982_188aa_+2	n to n	BHPROD|MQB277_494892_495458_+3_ATG_188	188	Cytoplasmic	1		CYT	-	-	PF00430;ATP synthase B/B' CF(0)	-	-	-	-	-	-	-	-	TMhelix;Region of a membrane-bound protein predicted to be embedded in the membrane.	F(1)F(0) ATP synthase produces ATP from ADP in the presence of a proton or sodium gradient. F-type ATPases consist of two structural domains, F(1) containing the extramembraneous catalytic core and F(0) containing the membrane proton channel, linked together by a central stalk and a peripheral stalk. During catalysis, ATP synthesis in the catalytic domain of F(1) is coupled via a rotary mechanism…	aproNOG	C	1	56	1148	-0.241231	0.643979	211.865	182.057	607.345	10	0	3.03331	6.73702	TM predominant
BH_RS02025|rso|ens|geno|chemg|prod|NC_005956_474995_475489_+2_ATG_164	NC_005956	474995	475489	+2	ATG	492	0	BH_RS02025	BH04140	BH04140	474995..475489(+)	NC_005956_04250	ORF_474995..475489_164aa_+2	n to n	BHPROD|MQB277_495471_495965_+3_ATG_164	164	Cytoplasmic	1		CYT	-	-	PF00430;ATP synthase B/B' CF(0)	-	-	-	-	-	-	-	-	TMhelix;Region of a membrane-bound protein predicted to be embedded in the membrane.	F(1)F(0) ATP synthase produces ATP from ADP in the presence of a proton or sodium gradient. F-type ATPases consist of two structural domains, F(1) containing the extramembraneous catalytic core and F(0) containing the membrane proton channel, linked together by a central stalk and a peripheral stalk. During catalysis, ATP synthesis in the catalytic domain of F(1) is coupled via a rotary mechanism…	aproNOG	C	1	41	832	-0.248494	0.658808	382.03	355.463	937.728	10	0	8.04524	1.42915	IM predominant
BH_RS02030|rso|ens|geno|+36aa_chemg|prod|NC_005956_478398_476176_-2_ATG_740	NC_005956	476176	478398	-2	ATG	2220	0	BH_RS02030	BH04150	BH04150	476176..478506(-)	NC_005956_04260	ORF_476176..478398_740aa_-2	n to n	BHPROD|MQB277_498874_496652_-3_ATG_740	740	Cytoplasmic	0		CYT	G3DSA:1.10.730.10	PTHR30075,PTHR30075:SF2	PF02092;Glycyl-tRNA synthetase beta subunit,PF05746;DALR anticodon binding domain	-	PR01045;Glycyl-tRNA synthetase beta subunit signature	-	PS50861;Heterodimeric glycyl-transfer RNA synthetases family profile.	-	-	SSF109604,SSF47323	-	-	Glycyl-tRNA synthetase beta subunit	aproNOG	J	1	48	317	0.566482	0.444801	199.793	232.55	423.88	1.49682e-08	1.23541	5.15381	0.600698
BH_RS02035|rso|ens|geno|chemg|prod|NC_005956_479344_478391_-1_GTG_317	NC_005956	478391	479344	-1	GTG	951	0	BH_RS02035	BH04160	BH04160	478391..479344(-)	NC_005956_04270	ORF_478391..479236_281aa_-1	n to n	BHPROD|MQB277_499820_498867_-2_GTG_317	317	Cytoplasmic	0		CYT	G3DSA:1.20.58.180,G3DSA:3.30.930.10	PTHR30075	PF02091;Glycyl-tRNA synthetase alpha subunit	-	PR01044;Glycyl-tRNA synthetase alpha subunit signature	-	PS50861;Heterodimeric glycyl-transfer RNA synthetases family profile.	-	-	SSF55681	TIGR00388;glyQ: glycine--tRNA ligase, alpha subunit	-	glycyl-tRNA synthetase alpha subunit	aproNOG	J	1	13	115	0.692594	0.545103	79.0956	70.7466	203.771	7.36425	2.93567e-07	9.24945	4.54772e-06	IM predominant
BHORF|NC_005956_478708_478779_+1_GTG_23	NC_005956	478708	478779	+1	GTG	69	6						ORF_478708..478779_23aa_+1		BHORF|MQB277_499184_499255_+2_GTG_23	23	Unknown	0		CYT	-	-	-	-	-	-	-	-	-	-	-	-				0	1	2	NA	NA	0	0	0
BHCHEMG|NC_005956_479013_478822_-2_TTG_63	NC_005956	478822	479013	-2	TTG	189	1				478822..479013(-)		ORF_478822..479265_147aa_-2			63	Unknown	0	yes	CYT	-	-	-	-	-	-	-	-	-	-	-	-				0	0	0	NA	NA	0	0	0
BH_RS02040|rso|ens|geno|+16aa_chemg|prod|NC_005956_481140_479446_-2_ATG_564	NC_005956	479446	481140	-2	ATG	1692	0	BH_RS02040	BH04170	BH04170	479446..481188(-)	NC_005956_04280	ORF_479446..481188_580aa_-2	n to n		564	Unknown	0	yes	SpI	G3DSA:1.25.40.10	PTHR23083:SF383,PTHR23083	PF13429;Tetratricopeptide repeat,PF13181;Tetratricopeptide repeat	-	-	-	PS50005;TPR repeat profile.,PS50293;TPR repeat region circular profile.	-	SM00028;Tetratricopeptide repeats	SSF48452	-	-	TPR domain protein	aproNOG	S	1	58	418	-0.43132	0.53181	483.763	555.471	995.074	10	0	2.26426	7.32946	TM exclusive
BHCHEMG|NC_005956_480788_480946_+2_TTG_52	NC_005956	480788	480946	+2	TTG	156	1				480788..480946(+)		ORF_480791..480946_51aa_+2			52	Unknown	0		TMH	-	-	-	-	-	-	-	-	-	-	-	-				0	0	0	NA	NA	0	0	0
BH_RS02045|+18aa_rso|+35aa_chemg|prod|NC_005956_482248_481232_-1_TTG_338	NC_005956	481232	482248	-1	TTG	1014	0	BH_RS02045	BH04180	BH04180	481232..482353(-)	NC_005956_04290	ORF_481232..482341_369aa_-1	n to n	BHPROD|MQB277_502724_501708_-2_TTG_338	338	Cytoplasmic	0		CYT	G3DSA:1.10.600.10	PTHR12001	PF00348;Polyprenyl synthetase	-	-	PS00723;Polyprenyl synthases signature 1.	-	-	-	SSF48576	-	-	synthase	aproNOG	H	1	20	137	1.04251	0.31585	120.362	130.316	315.083	0.0730554	0.064062	6.74707	1.76286
BH_RS02050|rso|ens|geno|chemg|prod|NC_005956_482501_483292_+2_ATG_263	NC_005956	482501	483292	+2	ATG	789	0	BH_RS02050	BH04190	BH04190	482501..483292(+)	NC_005956_04300	ORF_482501..483292_263aa_+2	n to n	BHPROD|MQB277_502977_503768_+3_ATG_263	263	Cytoplasmic	0		CYT	G3DSA:3.40.50.150	PTHR18895:SF59,PTHR18895	PF05175;Methyltransferase small domain	-	-	PS00092;N-6 Adenine-specific DNA methylases signature.	-	-	-	SSF53335	-	-	methyltransferase small	aproNOG	S	1	15	103	-0.130326	0.933512	678.212	905.143	1513.6	6.62856	0.00266761	4.88914	0.056254	TM predominant
BH_RS02055|rso|ens|geno|chemg|prod|NC_005956_483450_484301_+3_TTG_283	NC_005956	483450	484301	+3	TTG	849	0	BH_RS02055	BH04200	BH04200	483450..484301(+)	NC_005956_04310	ORF_483732..484301_189aa_+3	n to n	BHPROD|MQB277_503926_504777_+1_TTG_283	283	CytoplasmicMembrane	0		CYT	G3DSA:3.90.226.10	PTHR30341	PF01343;Peptidase family S49	-	-	-	-	-	-	SSF52096	-	-	peptidase	aproNOG	OU	1	99	2610	-0.80644	0.0788956	1175.32	1450.76	2785.47	10	0	3.11039	6.72445	TM predominant
BH_RS02060|rso|ens|geno|chemg|prod|NC_005956_484560_485468_+3_ATG_302	NC_005956	484560	485468	+3	ATG	906	0	BH_RS02060	BH04210	BH04210	484560..485468(+)	NC_005956_04320	ORF_484560..485468_302aa_+3	n to n	BHPROD|MQB277_505036_505944_+1_ATG_302	302	Unknown	0		CYT	G3DSA:3.30.70.890,G3DSA:3.30.230.10	PTHR20861,PTHR20861:SF2	PF08544;GHMP kinases C terminal	PIRSF010376	-	-	-	-	-	SSF54211,SSF55060	TIGR00154;ispE: 4-(cytidine 5'-diphospho)-2-C-methyl-D-erythritol kinase	-	Catalyzes the phosphorylation of the position 2 hydroxy group of 4-diphosphocytidyl-2C-methyl-D-erythritol (By similarity)	aproNOG	I	1	8	24	0.22531	0.966996	339.503	228.772	923.544	7.55975	0.00976562	4.19582	0.237378	TM predominant
BHGENO0486|NC_005956_485715_485846_+3_GTG_43	NC_005956	485715	485846	+3	GTG	129	1	BH_RS02065(p)	BH04220(p)	BARHE0486			ORF_485715..485846_43aa_+3	p to p		43	Unknown	0		CYT	-	-	-	-	-	-	-	-	-	-	-	-				0	0	0	NA	NA	176.28	182.148	363.673
BHCHEMG|NC_005956_486263_485946_-3_CTG_105	NC_005956	485946	486263	-3	CTG	315	1	BH_RS02065(p)	BH04220(p)	BH04220-2;BH04220-3(p)	485946..486263(-)		ORF_485946..486098_50aa_-3	p to p		105	Unknown	2		CYT	-	-	-	-	-	-	-	-	-	-	-	-				0	0	0	NA	NA	111.238	128.726	221.937
BHCHEMG|NC_005956_486627_486454_-2_ATG_57	NC_005956	486454	486627	-2	ATG	171	1	BH_RS02065(p)	BH04220(p)		486454..486627(-)		ORF_486454..486684_76aa_-2	p to p		57	Unknown	0		CYT	-	-	-	-	-	-	-	-	-	-	-	-				0	0	0	NA	NA	3.93829	2.68709	6.83987
BHGENOBH04220-4_fCDS4_p|prod|NC_005956_486673_486479_-1_ATG_64	NC_005956	486479	486673	-1	ATG	192	1	BH_RS02065(p)	BH04220(p)	BH04220-4(p)		NC_005956_04330	ORF_486479..486673_64aa_-1	p to p	BHPROD|MQB277_507149_506955_-2_ATG_64	64	Unknown	0		CYT	-	-	-	-	-	-	-	-	-	-	-	-	Integrase	aproNOG	S	0	0	0	NA	NA	12.2427	16.7709	25.764
BH_RS02070|rso|ens|geno|chemg|prod|NC_005956_487066_487737_+1_ATG_223	NC_005956	487066	487737	+1	ATG	669	0	BH_RS02070	BH04230	BH04230	487066..487737(+)	NC_005956_04340	ORF_487066..487737_223aa_+1	n to n	BHPROD|MQB277_507542_508213_+2_ATG_223	223	Cytoplasmic	0		CYT	G3DSA:3.30.420.10	PTHR10954,PTHR10954:SF11	PF01351;Ribonuclease HII	-	-	-	-	-	-	SSF53098	-	-	Endonuclease that specifically degrades the RNA of RNA- DNA hybrids (By similarity)	aproNOG	L	1	13	50	-0.756074	0.694407	321.153	327.244	856.073	8.63043	0.00033021	4.99784	0.000160995	TM predominant
BHCHEMG|NC_005956_487646_487756_+2_GTG_36	NC_005956	487646	487756	+2	GTG	108	1				487646..487756(+)		ORF_487664..487756_30aa_+2			36	Unknown	0		CYT	-	-	-	-	-	-	-	-	-	-	-	-				0	0	0	NA	NA	0	0	0
BHCHEMG|NC_005956_488091_487933_-2_CTG_52	NC_005956	487933	488091	-2	CTG	156	1				487933..488091(-)		ORF_487933..488073_46aa_-2			52	Unknown	0		CYT	-	-	-	-	-	-	-	-	-	-	-	-				0	0	0	NA	NA	0	0	0
BH_RS02075|rso|ens|geno|chemg|prod|NC_005956_487734_488696_+3_ATG_320	NC_005956	487734	488696	+3	ATG	960	0	BH_RS02075	BH04240	BH04240	487734..488696(+)	NC_005956_04350	ORF_487734..488696_320aa_+3	n to n	BHPROD|MQB277_508210_509172_+1_ATG_320	320	CytoplasmicMembrane	0		CYT	G3DSA:3.90.870.10	PTHR17490:SF3,PTHR17490	PF01300;Telomere recombination,PF03481;Putative GTP-binding controlling metal-binding	PIRSF004930	-	-	PS51163;YrdC-like domain profile.	-	-	SSF55821	TIGR00057;TIGR00057: tRNA threonylcarbamoyl adenosine modification protein, Sua5/YciO/YrdC/YwlC family	-	sua5 ycio yrdc	aproNOG	J	1	19	168	-0.419223	0.677123	252.568	326.296	684.666	9.33587e-08	6.67677	9.92778	0.0089857	Cyt predominant
BHCHEMG|NC_005956_489156_488878_-2_GTG_92	NC_005956	488878	489156	-2	GTG	276	0				488878..489156(-)		ORF_488878..489042_54aa_-2			92	Unknown	0		CYT	-	-	-	-	-	-	-	-	-	-	-	-				0	0	0	NA	NA	0	0	0
BHCHEMG|NC_005956_489843_489268_-2_ATG_191	NC_005956	489268	489843	-2	ATG	573	0				489268..489843(-)		ORF_489268..489843_191aa_-2			191	Unknown	0		CYT	-	-	-	-	-	-	-	-	-	-	-	-				0	0	0	NA	NA	0	0	0
BH_RS02080|rso|ens|geno|+2aa_chemg|prod|NC_005956_488699_490108_+2_ATG_469	NC_005956	488699	490108	+2	ATG	1407	0	BH_RS02080	BH04250	BH04250	488693..490108(+)	NC_005956_04360	ORF_488693..490108_471aa_+2	n to n	BHPROD|MQB277_509175_510584_+3_ATG_469	469	Cytoplasmic	0		CYT	G3DSA:1.10.45.10,G3DSA:3.30.465.10,G3DSA:3.30.43.10	PTHR11748:SF35,PTHR11748	PF02913;FAD linked oxidases, C-terminal domain,PF01565;FAD binding domain	-	-	-	PS51387;PCMH-type FAD-binding domain profile.	-	-	SSF56176,SSF55103	-	-	FAD linked oxidase domain protein	aproNOG	C	1	5	17	0.636243	0.880817	157.467	146.875	390.378	5.78125	0	4.96609	0	IM exclusive
BH_RS02085|rso|ens|geno|-36aa_chemg|prod|NC_005956_490259_490783_+2_ATG_174	NC_005956	490259	490783	+2	ATG	522	0	BH_RS02085	BH04260	BH04260	490367..490783(+)	NC_005956_04370	ORF_490259..490783_174aa_+2	n to n	BHPROD|MQB277_510735_511259_+3_ATG_174	174	Unknown	0		CYT	-	-	-	-	-	-	-	-	-	-	-	-	NA	aproNOG	S	1	5	6	NA	NA	1386.22	1698.53	2645.23	6.83594	0	2.55	0	IM exclusive
BH_RS02090|rso|ens|geno|chemg|prod|NC_005956_492664_491381_-1_ATG_427	NC_005956	491381	492664	-1	ATG	1281	0	BH_RS02090	BH04270	BH04270	491381..492664(-)	NC_005956_04380	ORF_491381..492664_427aa_-1	n to n	BHPROD|MQB277_513140_511857_-2_ATG_427	427	Cytoplasmic	0		CYT	G3DSA:3.40.50.20,G3DSA:3.30.470.20,G3DSA:3.30.1490.20,G3DSA:3.90.600.10	PTHR10520	PF01071;Phosphoribosylglycinamide synthetase, ATP-grasp (A) domain,PF02844;Phosphoribosylglycinamide synthetase, N domain,PF02843;Phosphoribosylglycinamide synthetase, C domain	-	-	PS00184;Phosphoribosylglycinamide synthetase signature.	PS50975;ATP-grasp fold profile.	-	-	SSF56059,SSF52440,SSF51246	TIGR00877;purD: phosphoribosylamine--glycine ligase	-	Phosphoribosylglycinamide synthetase	aproNOG	F	1	44	405	-0.103817	0.887944	907.021	777.9	2152.12	0	3.78282	9.99522	1.39495e-08
BHCHEMG|NC_005956_492489_492677_+3_TTG_62	NC_005956	492489	492677	+3	TTG	186	0				492489..492677(+)		ORF_492522..492677_51aa_+3			62	Unknown	0		TMH	-	-	-	-	-	-	-	-	-	-	-	-				0	0	0	NA	NA	2.38248	3.87918	4.74122
BH_RS02095|rso|ens|geno|+1aa_chemg|prod|NC_005956_492756_493760_+3_ATG_334	NC_005956	492756	493760	+3	ATG	1002	0	BH_RS02095	BH04280	BH04280	492753..493760(+)	NC_005956_04390	ORF_492756..493760_334aa_+3	n to n	BHPROD|MQB277_513232_514236_+1_ATG_334	334	CytoplasmicMembrane	9		CYT	-	PTHR11048,PTHR11048:SF7	PF01040;UbiA prenyltransferase family	-	-	PS00943;UbiA prenyltransferase family signature.	-	-	-	-	TIGR01474;ubiA_proteo: 4-hydroxybenzoate polyprenyl transferase	TMhelix;Region of a membrane-bound protein predicted to be embedded in the membrane.	Synthesis of 3-octaprenyl-4-hydroxybenzoate (By similarity)	aproNOG	H	1	11	65	-0.600796	0.716814	165.815	227.48	350.389	9.80973	4.76837e-06	7.79787	0.759055	IM predominant
BHGENO0495|NC_005956_494082_493849_-2_GTG_77	NC_005956	493849	494082	-2	GTG	231	1			BARHE0495			ORF_493849..493929_26aa_-2			77	Unknown	0		CYT	-	-	-	-	-	-	-	-	-	-	-	-				0	0	0	NA	NA	28.1822	25.5499	46.6125
BH_RS02100|NC_005956_494219_494404_+2_ATG_61	NC_005956	494219	494404	+2	ATG	183	1	BH_RS02100					ORF_494219..494404_61aa_+2	0 to n		61	Unknown	0		CYT	-	-	-	-	-	-	-	-	-	-	-	-				0	0	0	NA	NA	109.993	135.888	220.866
BH_RS02105|rso|ens|geno|chemg|prod|NC_005956_495092_494469_-3_ATG_207	NC_005956	494469	495092	-3	ATG	621	0	BH_RS02105	BH04290	BH04290	494469..495092(-)	NC_005956_04400	ORF_494469..495092_207aa_-3	n to n		207	Cytoplasmic	0		CYT	G3DSA:2.30.110.10	PTHR10851	PF10590;Pyridoxine 5'-phosphate oxidase C-terminal dimerisation region,PF01243;Pyridoxamine 5'-phosphate oxidase	PIRSF000190	-	PS01064;Pyridoxamine 5'-phosphate oxidase signature.	-	-	-	SSF50475	TIGR00558;pdxH: pyridoxamine 5'-phosphate oxidase	-	Catalyzes the oxidation of either pyridoxine 5'- phosphate (PNP) or pyridoxamine 5'-phosphate (PMP) into pyridoxal 5'-phosphate (PLP) (By similarity)	aproNOG	H	1	11	45	0.402188	0.847982	239.308	340.24	430.873	3.33529e-10	9.99756	4.96181	0.00398961	Cyt predominant
BH_RS02110|rso|ens|geno|chemg|prod|NC_005956_495410_496312_+2_ATG_300	NC_005956	495410	496312	+2	ATG	900	0	BH_RS02110	BH04300	BH04300	495410..496312(+)	NC_005956_04410	ORF_495410..496312_300aa_+2	n to n	BHPROD|MQB277_515886_516788_+3_ATG_300	300	Cytoplasmic	0		CYT	G3DSA:1.10.287.110,G3DSA:2.60.260.20	PTHR24076	PF00226;DnaJ domain,PF01556;DnaJ C terminal domain	-	PR00625;DnaJ domain signature	-	PS50076;dnaJ domain profile.	-	SM00271;DnaJ molecular chaperone homology domain	SSF49493,SSF46565	-	-	DnaJ domain protein	aproNOG	O	1	62	1107	0.656869	0.204152	13194.7	14292.4	23658.3	0.204928	0	9.9937	0.000948025
BH_RS02115|rso|ens|geno|+2aa_chemg|prod|NC_005956_496423_497241_+1_ATG_272	NC_005956	496423	497241	+1	ATG	816	0	BH_RS02115	BH04310	BH04310	496417..497241(+)	NC_005956_04420	ORF_496417..497241_274aa_+1	n to n	BHPROD|MQB277_516899_517717_+2_ATG_272	272	CytoplasmicMembrane	0		CYT	G3DSA:3.40.50.720	PTHR24322,PTHR24322:SF317	PF13561;Enoyl-(Acyl carrier protein) reductase	PIRSF000094	PR00081;Glucose/ribitol dehydrogenase family signature	-	-	-	-	SSF51735	-	-	Enoyl- acyl-carrier-protein reductase NADH	aproNOG	I	1	47	1136	0.598488	0.244953	333.719	440.395	682.735	0	0.00203629	9.99999	5.0404e-06
BH_RS02120|rso|ens|geno|chemg|prod|NC_005956_497369_498469_+2_ATG_366	NC_005956	497369	498469	+2	ATG	1098	0	BH_RS02120	BH04320	BH04320	497369..498469(+)	NC_005956_04430	ORF_497369..498469_366aa_+2	n to n	BHPROD|MQB277_517845_518945_+3_ATG_366	366	Cytoplasmic	0		CYT	G3DSA:3.60.150.10	PTHR21085	PF01264;Chorismate synthase	PIRSF001456	-	PS00789;Chorismate synthase signature 3.,PS00787;Chorismate synthase signature 1.,PS00788;Chorismate synthase signature 2.	-	-	-	SSF103263	TIGR00033;aroC: chorismate synthase	-	5-enolpyruvylshikimate-3-phosphate phospholyase	aproNOG	E	1	22	346	0.549734	0.444117	1171.5	1280.39	2535.43	0	10	9.78996	0.0430903	Cyt predominant
BHCHEMG|NC_005956_498978_498484_-2_TTG_164	NC_005956	498484	498978	-2	TTG	492	0				498484..498978(-)		ORF_498484..498894_136aa_-2			164	Unknown	0		CYT	-	-	-	-	-	-	-	-	-	-	-	-				0	0	0	NA	NA	0	0	0
BH_RS02125|rso|ens|geno|chemg|prod|NC_005956_498473_499579_+2_ATG_368	NC_005956	498473	499579	+2	ATG	1104	0	BH_RS02125	BH04330	BH04330	498473..499579(+)	NC_005956_04440	ORF_498473..499579_368aa_+2	n to n	BHPROD|MQB277_518949_520055_+3_ATG_368	368	Cytoplasmic	0		CYT	G3DSA:3.90.870.10	PTHR21327,PTHR21327:SF6	PF00925;GTP cyclohydrolase II,PF00926;3,4-dihydroxy-2-butanone 4-phosphate synthase	PIRSF001259	-	-	-	-	-	SSF142695,SSF55821	TIGR00506;ribB: 3,4-dihydroxy-2-butanone-4-phosphate synthase	-	Catalyzes the conversion of D-ribulose 5-phosphate to formate and 3,4-dihydroxy-2-butanone 4-phosphate (By similarity)	aproNOG	H	1	35	378	0.496852	0.476212	406.804	541.292	732.892	1.59872e-14	2.81494	9.94437	0.0179914
BH_RS02130|rso|ens|geno|+14aa_chemg|prod|NC_005956_499587_499841_+3_ATG_84	NC_005956	499587	499841	+3	ATG	252	0	BH_RS02130	BH04340	BH04340	499545..499841(+)	NC_005956_04450	ORF_499587..499841_84aa_+3	n to n	BHPROD|MQB277_520063_520317_+1_ATG_84	84	Cytoplasmic	0		CYT	G3DSA:1.10.287.1040	-	PF02609;Exonuclease VII small subunit	-	-	-	-	-	-	SSF116842	TIGR01280;xseB: exodeoxyribonuclease VII, small subunit	-	Bidirectionally degrades single-stranded DNA into large acid-insoluble oligonucleotides, which are then degraded further into small acid-soluble oligonucleotides (By similarity)	aproNOG	L	1	10	137	0.149128	0.900616	657.711	852.003	1390.48	0	9.97232	4.41176	4.99876	Cyt predominant
BH_RS02135|rso|ens|geno|chemg|prod|NC_005956_500048_501970_+2_TTG_640	NC_005956	500048	501970	+2	TTG	1920	0	BH_RS02135	BH04350	BH04350	500048..501970(+)	NC_005956_04460	ORF_500438..501970_510aa_+2	n to n	BHPROD|MQB277_520524_522446_+3_TTG_640	640	Cytoplasmic	0		CYT	G3DSA:3.40.50.920,G3DSA:3.40.50.970	PTHR11624,PTHR11624:SF61	PF02780;Transketolase, C-terminal domain,PF13292;1-deoxy-D-xylulose-5-phosphate synthase,PF02779;Transketolase, pyrimidine binding domain	-	-	PS00801;Transketolase signature 1.	-	-	SM00861;Transketolase, pyrimidine binding domain	SSF52518,SSF52922	TIGR00204;dxs: 1-deoxy-D-xylulose-5-phosphate synthase	-	Catalyzes the acyloin condensation reaction between C atoms 2 and 3 of pyruvate and glyceraldehyde 3-phosphate to yield 1-deoxy-D-xylulose-5-phosphate (DXP) (By similarity)	aproNOG	H	1	41	322	0.0695592	0.933526	2298.33	1734.66	7104.13	9.31285	1.20792e-13	7.34264	6.96176e-05	IM predominant
BHCHEMG|NC_005956_502750_502316_-1_TTG_144	NC_005956	502316	502750	-1	TTG	432	0				502316..502750(-)		ORF_502316..502663_115aa_-1			144	Unknown	0		CYT	-	-	-	-	-	-	-	-	-	-	-	-				0	0	0	NA	NA	0	0	0
BH_RS02140|rso|ens|geno|chemg|prod|NC_005956_501972_502721_+3_ATG_249	NC_005956	501972	502721	+3	ATG	747	0	BH_RS02140	BH04360	BH04360	501972..502721(+)	NC_005956_04470	ORF_501972..502721_249aa_+3	n to n	BHPROD|MQB277_522448_523197_+1_ATG_249	249	Cytoplasmic	0		CYT	G3DSA:3.10.290.10,G3DSA:3.40.50.150	PTHR32319,PTHR32319:SF0	PF01479;S4 domain,PF01728;FtsJ-like methyltransferase	PIRSF005578	-	-	PS50889;S4 RNA-binding domain profile.	-	SM00363;S4 RNA-binding domain	SSF55174,SSF53335	-	-	hemolysin A	aproNOG	J	1	8	32	1.01381	0.662569	11.1583	11.608	31.4941	1.14087e-07	9.9791	4.99186	0	Cyt predominant
BHCHEMG|NC_005956_502895_502755_-3_ATG_46	NC_005956	502755	502895	-3	ATG	138	1				502755..502895(-)		ORF_502755..502895_46aa_-3			46	Unknown	0		CYT	-	-	-	-	-	-	-	-	-	-	-	-				0	0	0	NA	NA	0	0	0
BH_RS02145|rso|ens|geno|chemg|prod|NC_005956_502714_503967_+1_GTG_417	NC_005956	502714	503967	+1	GTG	1251	0	BH_RS02145	BH04370	BH04370	502714..503967(+)	NC_005956_04480	ORF_503170..503967_265aa_+1	n to n	BHPROD|MQB277_523190_524443_+2_GTG_417	417	Cytoplasmic	0		CYT	G3DSA:2.40.50.140,G3DSA:3.40.50.150	PTHR11061,PTHR11061:SF31	PF05958;tRNA (Uracil-5-)-methyltransferase	-	-	-	PS51687;SAM-dependent methyltransferase RNA m(5)U-type domain profile.	-	-	SSF53335	-	-	23S rRNA	aproNOG	J	1	10	18	1.46632	0.663137	731.75	892.666	1631.64	2.5	0	4.98837	0	IM exclusive
BH_RS02150|rso|ens|geno|chemg|prod|NC_005956_505449_504031_-2_ATG_472	NC_005956	504031	505449	-2	ATG	1416	0	BH_RS02150	BH04380	BH04380	504031..505449(-)	NC_005956_04490	ORF_504031..505449_472aa_-2	n to n	BHPROD|MQB277_525925_524507_-3_ATG_472	472	Cytoplasmic	0		CYT	-	PTHR30624,PTHR30624:SF4	PF01523;Putative modulator of DNA gyrase	PIRSF004919	-	-	-	-	-	SSF111283	-	-	peptidase U62, modulator of DNA gyrase	aproNOG	S	1	55	1069	0.404228	0.438973	1743.49	1229.13	4241.68	0	10	9.97931	0.00617349	Cyt predominant
BH_RS02155|rso|ens|geno|chemg|prod|NC_005956_506076_505537_-2_GTG_179	NC_005956	505537	506076	-2	GTG	537	0	BH_RS02155	BH04390	BH04390	505537..506076(-)	NC_005956_04500	ORF_505537..505800_87aa_-2	n to n	BHPROD|MQB277_526552_526013_-3_GTG_179	179	Unknown	0	yes	SpI	-	-	PF06776;Invasion associated locus B (IalB) protein	-	-	-	-	SignalP-noTM	-	-	-	-	invasion associated locus B	aproNOG	S	1	13	60	-0.118644	0.966461	417.22	298.399	1065.53	4.89827e-05	8.67535	5.88079	0	Cyt predominant
BHCHEMG|NC_005956_506829_506575_-2_ATG_84	NC_005956	506575	506829	-2	ATG	252	0				506575..506829(-)		ORF_506575..506829_84aa_-2			84	Unknown	0		CYT	-	-	-	-	-	-	-	-	-	-	-	-				0	0	0	NA	NA	0	0	0
BH_RS02160|rso|ens|geno|+3aa_chemg|prod|NC_005956_506504_507442_+2_ATG_312	NC_005956	506504	507442	+2	ATG	936	0	BH_RS02160	BH04400	BH04400	506495..507442(+)	NC_005956_04510	ORF_506504..507442_312aa_+2	n to n	BHPROD|MQB277_526980_527918_+3_ATG_312	312	CytoplasmicMembrane	9		CYT	-	PTHR11048	PF01040;UbiA prenyltransferase family	-	-	PS00943;UbiA prenyltransferase family signature.	-	-	-	-	TIGR01473;cyoE_ctaB: protoheme IX farnesyltransferase	TMhelix;Region of a membrane-bound protein predicted to be embedded in the membrane.	Converts heme B (protoheme IX) to heme O by substitution of the vinyl group on carbon 2 of heme B porphyrin ring with a hydroxyethyl farnesyl side group (By similarity)	aproNOG	O	1	6	45	0.14439	0.963853	259.735	378.206	455.326	9.39351	5.48363e-05	4.17725	4.34976	TM predominant
BH_RS02165|rso|ens|geno|chemg|prod|NC_005956_507628_508659_+1_ATG_343	NC_005956	507628	508659	+1	ATG	1029	0	BH_RS02165	BH04410	BH04410	507628..508659(+)	NC_005956_04520	ORF_507628..508659_343aa_+1	n to n	BHPROD|MQB277_528104_529135_+2_ATG_343	343	Cytoplasmic	0		CYT	-	PTHR30426	PF02401;LytB protein	-	-	-	-	-	-	-	TIGR00216;ispH_lytB: 4-hydroxy-3-methylbut-2-enyl diphosphate reductase	-	Converts 1-hydroxy-2-methyl-2-(E)-butenyl 4-diphosphate into isopentenyl diphosphate (IPP) and dimethylallyl diphosphate (DMAPP) (By similarity)	aproNOG	I	1	16	104	1.0282	0.385818	169.951	214.755	324.844	6.35419	0.000580835	5	1.88313e-07	TM predominant
BH_RS02170|rso|ens|geno|chemg|prod|NC_005956_508683_509642_+3_ATG_319	NC_005956	508683	509642	+3	ATG	957	0	BH_RS02170	BH04420	BH04420	508683..509642(+)	NC_005956_04530	ORF_508683..509642_319aa_+3	n to n	BHPROD|MQB277_529159_530118_+1_ATG_319	319	Cytoplasmic	0		CYT	G3DSA:3.30.200.20,G3DSA:3.90.1200.10	PTHR21064	PF01636;Phosphotransferase enzyme family	-	-	-	-	-	-	SSF56112	TIGR00938;thrB_alt: homoserine kinase	-	homoserine kinase	aproNOG	E	1	12	63	0.14439	0.947035	133.595	151.605	326.432	1.48368	0.592346	4.99984	2.22496e-05
BHCHEMG|NC_005956_509670_509804_+3_TTG_44	NC_005956	509670	509804	+3	TTG	132	1				509670..509804(+)		ORF_509685..509804_39aa_+3			44	Unknown	0		CYT	-	-	-	-	-	-	-	-	-	-	-	-				0	0	0	NA	NA	0	0	0
BH_RS02175|rso|ens|geno|chemg|prod|NC_005956_509648_510115_+2_ATG_155	NC_005956	509648	510115	+2	ATG	465	0	BH_RS02175	BH04430	BH04430	509648..510115(+)	NC_005956_04540	ORF_509648..510115_155aa_+2	n to n	BHPROD|MQB277_530124_530591_+3_ATG_155	155	Unknown	0		CYT	G3DSA:3.30.420.10	PTHR10642	PF00075;RNase H	-	-	-	PS50879;RNase H domain profile.	-	-	SSF53098	-	-	Endonuclease that specifically degrades the RNA of RNA- DNA hybrids (By similarity)	aproNOG	L	1	12	56	0.98715	0.549441	61.2837	76.1694	162.441	2.1405	0.0957865	8.57704	0.000957906
BH_RS02180|rso|ens|geno|chemg|prod|NC_005956_511016_510162_-3_ATG_284	NC_005956	510162	511016	-3	ATG	852	0	BH_RS02180	BH04440	BH04440	510162..511016(-)	NC_005956_04550	ORF_510162..511016_284aa_-3	n to n	BHPROD|MQB277_531492_530638_-1_ATG_284	284	Unknown	1		SpI	-	-	PF11412;Disulphide bond corrector protein DsbC	-	-	-	-	-	-	-	-	TMhelix;Region of a membrane-bound protein predicted to be embedded in the membrane.	Inherit from COG: cytochrome c biogenesis protein, transmembrane region	aproNOG	CO	1	13	77	0.203284	0.901669	91.1581	156.847	146.69	2.63341	0.0350018	4.99997	2.82616e-06
BHCHEMG|NC_005956_510700_510894_+1_TTG_64	NC_005956	510700	510894	+1	TTG	192	1				510700..510894(+)		ORF_510781..510894_37aa_+1			64	Unknown	0		CYT	-	-	-	-	-	-	-	-	-	-	-	-				0	0	0	NA	NA	0	0	0
BH_RS02185|rso|ens|geno|+6aa_chemg|prod|NC_005956_511089_511673_+3_ATG_194	NC_005956	511089	511673	+3	ATG	582	0	BH_RS02185	BH04450	BH04450	511071..511673(+)	NC_005956_04560	ORF_511071..511673_200aa_+3	n to n	BHPROD|MQB277_531565_532149_+1_ATG_194	194	Unknown	0		CYT	G3DSA:3.30.70.1300,G3DSA:3.40.1740.10	PTHR30327,PTHR30327:SF1	PF02622;Uncharacterized ACR, COG1678	-	-	-	-	-	-	SSF143456	-	-	UPF0301 protein	aproNOG	K	1	11	211	-0.452382	0.616958	486.977	698.929	1135.02	0.587002	3.48683e-05	9.32674	0.247749
BH_RS02190|rso|ens|geno|chemg|prod|NC_005956_514606_511721_-1_GTG_961	NC_005956	511721	514606	-1	GTG	2883	0	BH_RS02190	BH04460	BH04460	511721..514606(-)	NC_005956_04570	ORF_511721..514285_854aa_-1	n to n		961	CytoplasmicMembrane	7	yes	SpI	G3DSA:3.30.70.270,G3DSA:3.30.450.20,G3DSA:3.20.20.450	PTHR10919,PTHR10919:SF71	PF08447;PAS fold,PF00563;EAL domain,PF07696;7TMR-DISM extracellular 2,PF00990;GGDEF domain	-	-	-	PS50883;EAL domain profile.,PS50887;GGDEF domain profile.,PS50113;PAC domain profile.	-	SM00052;Putative diguanylate phosphodiesterase,SM00267;diguanylate cyclase	SSF55073,SSF55785,SSF141868	TIGR00229;sensory_box: PAS domain S-box protein,TIGR00254;GGDEF: diguanylate cyclase (GGDEF) domain	TMhelix;Region of a membrane-bound protein predicted to be embedded in the membrane.	Diguanylate cyclase phosphodiesterase	aproNOG	T	1	64	705	-0.524483	0.370857	119.629	148.356	281.189	10	0	9.99613	0	IM predominant
BHCHEMG|NC_005956_512496_512879_+3_GTG_127	NC_005956	512496	512879	+3	GTG	381	0				512496..512879(+)		ORF_512760..512879_39aa_+3			127	Unknown	0		TMH	-	-	-	-	-	-	-	-	-	-	-	-				0	0	0	NA	NA	0	0	0
BHCHEMG|NC_005956_513306_513004_-2_TTG_100	NC_005956	513004	513306	-2	TTG	300	1				513004..513306(-)		ORF_513004..513282_92aa_-2			100	CytoplasmicMembrane	1		CYT	-	-	-	-	-	-	-	-	-	-	-	TMhelix;Region of a membrane-bound protein predicted to be embedded in the membrane.				0	0	0	NA	NA	0	0	0
BHCHEMG|NC_005956_513282_513557_+3_TTG_91	NC_005956	513282	513557	+3	TTG	273	0				513282..513557(+)		ORF_513336..513557_73aa_+3			91	Unknown	0		CYT	-	-	-	-	-	-	-	-	-	-	-	-				0	0	0	NA	NA	0	0	0
BHORF|NC_005956_513768_513643_-2_ATG_41	NC_005956	513643	513768	-2	ATG	123	1						ORF_513643..513768_41aa_-2			41	Unknown	0		CYT	-	-	-	-	-	-	-	-	-	-	-	-				0	1	1	NA	NA	0	0	0
BHCHEMG|NC_005956_514760_514864_+2_CTG_34	NC_005956	514760	514864	+2	CTG	102	1				514760..514864(+)		ORF_514772..514864_30aa_+2			34	Unknown	0		CYT	-	-	-	-	-	-	-	-	-	-	-	-				0	0	0	NA	NA	207.686	126.126	492.317
BH_RS02195|rso|ens|geno|chemg|prod|NC_005956_516332_515052_-3_ATG_426	NC_005956	515052	516332	-3	ATG	1278	0	BH_RS02195	BH04470	BH04470	515052..516332(-)	NC_005956_04580	ORF_515052..516332_426aa_-3	n to n	BHPROD|MQB277_536808_535528_-1_ATG_426	426	Unknown	0		CYT	G3DSA:3.30.830.10	PTHR11851	PF05193;Peptidase M16 inactive domain,PF00675;Insulinase (Peptidase family M16)	-	-	PS00143;Insulinase family, zinc-binding region signature.	-	-	-	SSF63411	-	-	peptidase	aproNOG	O	1	12	70	0.466318	0.761704	195.794	164.174	463.723	0.302268	0.19993	5.94701	0.000229993
BHCHEMG|NC_005956_515104_515244_+1_ATG_46	NC_005956	515104	515244	+1	ATG	138	1				515104..515244(+)		ORF_515104..515244_46aa_+1			46	Unknown	0		CYT	-	-	-	-	-	-	-	-	-	-	-	-				0	0	0	NA	NA	0	0	0
BH_RS02200|rso|ens|geno|chemg|prod|NC_005956_517816_516419_-1_ATG_465	NC_005956	516419	517816	-1	ATG	1395	0	BH_RS02200	BH04480	BH04480	516419..517816(-)	NC_005956_04590	ORF_516419..517816_465aa_-1	n to n	BHPROD|MQB277_538292_536895_-2_ATG_465	465	Cytoplasmic	0		CYT	G3DSA:3.40.50.1100,G3DSA:3.90.1380.10	PTHR10314:SF1,PTHR10314	PF00291;Pyridoxal-phosphate dependent enzyme,PF14821;Threonine synthase N terminus	-	-	PS00165;Serine/threonine dehydratases pyridoxal-phosphate attachment site.	-	-	-	SSF53686	TIGR00260;thrC: threonine synthase	-	Threonine synthase	aproNOG	E	1	30	167	1.11638	0.239875	53.8868	53.2932	136.809	4.26549e-06	2.44217	5	5.90905e-12
BH_RS02205|rso|ens|geno|chemg|prod|NC_005956_518833_518465_-1_ATG_122	NC_005956	518465	518833	-1	ATG	366	1	BH_RS02205	BH04490	BH04490	518465..518833(-)	NC_005956_04600	ORF_518465..518833_122aa_-1	n to n	BHPROD|MQB277_539309_538941_-2_ATG_122	122	CytoplasmicMembrane	1	yes	SpI	-	-	-	-	-	-	-	SignalP-noTM	-	-	-	TMhelix;Region of a membrane-bound protein predicted to be embedded in the membrane.				1	9	80	1.77565	0.18578	40.7358	13.9253	110.905	9.99913	4.52971e-13	4.99214	0.00112697	TM predominant
BH_RS02210|rso|ens|geno|chemg|prod|NC_005956_519408_519046_-2_ATG_120	NC_005956	519046	519408	-2	ATG	360	1	BH_RS02210	BH04500	BH04500	519046..519408(-)	NC_005956_04610	ORF_519046..519408_120aa_-2	n to n	BHPROD|MQB277_539884_539522_-3_ATG_120	120	CytoplasmicMembrane	1	yes	SpI	-	-	-	-	-	-	-	SignalP-noTM	-	-	-	TMhelix;Region of a membrane-bound protein predicted to be embedded in the membrane.				1	2	4	NA	NA	230.375	116.728	506.41	0	0	3.7995	0	IM exclusive
BHGENO0518|NC_005956_519623_519501_-3_TTG_40	NC_005956	519501	519623	-3	TTG	120	1			BARHE0518			ORF_519501..519623_40aa_-3			40	Unknown	0		CYT	-	-	-	-	-	-	-	-	-	-	-	-				0	0	0	NA	NA	312.898	334.109	803.662
BH_RS02215|rso|ens|geno|chemg|prod|NC_005956_519925_519590_-1_ATG_111	NC_005956	519590	519925	-1	ATG	333	1	BH_RS02215	BH04510	BH04510	519590..519925(-)	NC_005956_04620	ORF_519590..519925_111aa_-1	n to n	BHPROD|MQB277_540401_540066_-2_ATG_111	111	Unknown	1	yes	SpI	-	-	-	-	-	-	-	SignalP-noTM	-	-	-	TMhelix;Region of a membrane-bound protein predicted to be embedded in the membrane.				0	1	1	NA	NA	872.651	212.062	3012.46
BH_RS02220|rso|ens|geno|chemg|prod|NC_005956_521640_520939_-2_ATG_233	NC_005956	520939	521640	-2	ATG	699	0	BH_RS02220	BH04520	BH04520	520939..521640(-)	NC_005956_04630	ORF_520939..521640_233aa_-2	n to n	BHPROD|MQB277_542116_541415_-3_ATG_233	233	Cytoplasmic	0		CYT	G3DSA:3.40.50.1000,G3DSA:1.10.150.240	PTHR18901,PTHR18901:SF6	PF13419;Haloacid dehalogenase-like hydrolase	-	-	-	-	-	-	SSF56784	TIGR01509;HAD-SF-IA-v3: HAD hydrolase, family IA, variant 3	-	HAD-superfamily hydrolase subfamily IA variant 3	aproNOG	S	1	15	146	0.228626	0.83402	818.626	723.861	1997.91	1.1983e-09	8.87878	9.67326	0.000969753	Cyt predominant
BHCHEMG|NC_005956_522860_522489_-3_TTG_123	NC_005956	522489	522860	-3	TTG	369	0				522489..522860(-)		ORF_522489..522665_58aa_-3			123	Unknown	1		CYT	-	-	-	-	-	-	-	-	-	-	-	-				0	0	0	NA	NA	0	0	0
BH_RS02225|rso|ens|geno|chemg|prod|NC_005956_521989_523125_+1_ATG_378	NC_005956	521989	523125	+1	ATG	1134	0	BH_RS02225	BH04530	BH04530	521989..523125(+)	NC_005956_04640	ORF_521989..523125_378aa_+1	n to n	BHPROD|MQB277_542465_543601_+2_ATG_378	378	Cytoplasmic	0		CYT	G3DSA:3.40.50.150	PTHR13370,PTHR13370:SF4	PF01555;DNA methylase	-	PR00508;S21 class N4 adenine-specific DNA methyltransferase signature	PS00092;N-6 Adenine-specific DNA methylases signature.	-	-	-	SSF53335	-	-	DNA methylase N-4 N-6	aproNOG	L	1	9	30	1.46632	0.533434	934.214	2035.28	1661.91	1.69434	1.09375	3.29673	0.967442
BH_RS02230|rso|ens|geno|chemg|prod|NC_005956_524279_523173_-3_ATG_368	NC_005956	523173	524279	-3	ATG	1104	0	BH_RS02230	BH04540	BH04540	523173..524279(-)	NC_005956_04650	ORF_523173..524279_368aa_-3	n to n	BHPROD|MQB277_544755_543649_-1_ATG_368	368	Cytoplasmic	0		CYT	G3DSA:1.10.340.30,G3DSA:1.10.1670.10,G3DSA:3.90.79.10	PTHR10359:SF24,PTHR10359	PF14815;NUDIX domain,PF10576;Iron-sulfur binding domain of endonuclease III,PF00730;HhH-GPD superfamily base excision DNA repair protein	-	-	PS01155;Endonuclease III family signature.	-	-	SM00525;Target=BH_RS02230|rso|ens|geno|chemg|prod|NC_005956_524279_523173_-3_ATG_368 211 231,SM00478;endonuclease III	SSF48150,SSF55811	TIGR01084;mutY: A/G-specific adenine glycosylase	-	a g-specific adenine glycosylase	aproNOG	L	1	3	11	0.203284	1	919.115	1381.06	1537.31	2.5	0	4.85876	0	IM exclusive
BH_RS02235|rso|ens|geno|chemg|-19aa_prod|NC_005956_524441_524941_+2_ATG_166	NC_005956	524441	524941	+2	ATG	498	0	BH_RS02235	BH04550	BH04550	524441..524941(+)	NC_005956_04660	ORF_524441..524941_166aa_+2	n to n	BHPROD_+19aa_orf|MQB277_544917_545417_+3_ATG_166,BHPROD|MQB277_544974_545417_+3_ATG_147	166	Cytoplasmic	0		CYT	-	-	PF05258;Protein of unknown function (DUF721)	PIRSF032064	-	-	-	-	-	-	-	-	Protein of unknown function (DUF721)	aproNOG	S	1	10	53	-0.256148	0.906532	131.858	181.326	238.919	9.92483	0	4.99679	0.000421339	TM exclusive
BH_RS02240|rso|ens|geno|+15aa_chemg|prod|NC_005956_525027_525683_+3_ATG_218	NC_005956	525027	525683	+3	ATG	654	0	BH_RS02240	BH04560	BH04560	524982..525683(+)	NC_005956_04670	ORF_525027..525683_218aa_+3	n to n	BHPROD|MQB277_545503_546159_+1_ATG_218	218	Unknown	0	yes	SpI	G3DSA:3.40.30.10	PTHR13887:SF14,PTHR13887	PF13462;Thioredoxin	-	-	-	PS51352;Thioredoxin domain profile.	-	-	SSF52833	-	TMhelix;Region of a membrane-bound protein predicted to be embedded in the membrane.	DSBA Oxidoreductase	aproNOG	O	1	26	651	-0.0579486	0.928442	1757.21	1855.76	3901.56	0	9.99995	9.99999	8.01987e-07	Cyt predominant
BHCHEMG|NC_005956_526531_526695_+1_GTG_54	NC_005956	526531	526695	+1	GTG	162	1				526531..526695(+)		ORF_526588..526695_35aa_+1			54	Unknown	0	yes	CYT	-	-	-	-	-	-	-	-	-	-	-	-				0	0	0	NA	NA	0	0	0
BH_RS02245|rso|ens|geno|chemg|prod|NC_005956_525867_528542_+3_ATG_891	NC_005956	525867	528542	+3	ATG	2673	0	BH_RS02245	BH04570	BH04570	525867..528542(+)	NC_005956_04680	ORF_525867..528542_891aa_+3	n to n	BHPROD|MQB277_546343_549018_+1_ATG_891	891	Cytoplasmic	0		CYT	G3DSA:1.20.80.30,G3DSA:3.30.470.20,G3DSA:3.50.30.10,G3DSA:3.30.1490.20,G3DSA:3.20.20.60,G3DSA:1.10.189.10	PTHR22931,PTHR22931:SF9	PF02896;PEP-utilising enzyme, TIM barrel domain,PF01326;Pyruvate phosphate dikinase, PEP/pyruvate binding domain,PF00391;PEP-utilising enzyme, mobile domain	PIRSF000853	-	PS00370;PEP-utilizing enzymes phosphorylation site signature.,PS00742;PEP-utilizing enzymes signature 2.	-	-	-	SSF52009,SSF51621,SSF56059	TIGR01828;pyru_phos_dikin: pyruvate, phosphate dikinase	-	pyruvate phosphate dikinase	aproNOG	G	1	88	1418	0.225651	0.649526	480.73	385.348	1264	0	2.01311	7.43678	2.21914
BH_RS02250|rso|ens|geno|+7aa_chemg|prod|NC_005956_529593_528745_-2_ATG_282	NC_005956	528745	529593	-2	ATG	846	0	BH_RS02250	BH04580	BH04580	528745..529614(-)	NC_005956_04690	ORF_528745..529593_282aa_-2	n to n	BHPROD|MQB277_550069_549221_-3_ATG_282	282	Unknown	2		TMH	G3DSA:1.10.101.10	-	PF01471;Putative peptidoglycan binding domain	-	-	-	-	-	-	SSF47090	-	TMhelix;Region of a membrane-bound protein predicted to be embedded in the membrane.	Putative peptidoglycan binding domain	aproNOG	M	1	14	56	-1.5661	0.384011	1498.83	1717.92	3026.38	7.01052	0.00155374	4.93952	0.0141676	TM predominant
BH_RS02255|rso|ens|geno|+2aa_chemg|-44aa_prod|NC_005956_530494_530868_+1_ATG_124	NC_005956	530494	530868	+1	ATG	372	1	BH_RS02255	BH04590	BH04590	530488..530868(+)	NC_005956_04700	ORF_530494..530868_124aa_+1	n to n	BHPROD|MQB277_551102_551344_+2_ATG_80	124	Unknown	0	yes	SpI	-	-	-	-	-	-	-	-	-	-	-	TMhelix;Region of a membrane-bound protein predicted to be embedded in the membrane.	NA	aproNOG	S	1	3	7	NA	NA	2555.77	1739.57	5519.35	7.62695	0	1.5	0	IM exclusive
BH_RS02260|rso|ens|geno|chemg|prod|NC_005956_530981_531391_+2_ATG_136	NC_005956	530981	531391	+2	ATG	408	0	BH_RS02260	BH04600	BH04600	530981..531391(+)	NC_005956_04710	ORF_530981..531391_136aa_+2	n to n	BHPROD|MQB277_551457_551867_+3_ATG_136	136	Cytoplasmic	0		CYT	G3DSA:3.90.1010.10	PTHR12735,PTHR12735:SF11	PF02657;Fe-S metabolism associated domain	-	-	-	-	-	-	SSF82649	-	-	Fe-S metabolism associated	aproNOG	S	1	11	111	0.336257	0.782844	284.341	278.226	528.121	0.00226407	3.29369	5.36205	3.82157
BH_RS02265|rso|ens|geno|chemg|prod|NC_005956_531932_531495_-3_ATG_145	NC_005956	531495	531932	-3	ATG	435	0	BH_RS02265	BH04610	BH04610	531495..531932(-)	NC_005956_04720	ORF_531495..531932_145aa_-3	n to n	BHPROD|MQB277_552408_551971_-1_ATG_145	145	Unknown	0		CYT	-	-	PF05443;ROS/MUCR transcriptional regulator protein	-	-	-	-	-	-	-	-	-	Transcriptional regulator	aproNOG	K	1	24	345	1.12133	0.115904	638.951	1181	1180.46	0	9.99996	9.72021	0.00760636	Cyt predominant
BHGENO0530|chemg|NC_005956_532563_532781_+3_GTG_72	NC_005956	532563	532781	+3	GTG	216	1			BARHE0530	532563..532781(+)		ORF_532683..532781_32aa_+3			72	Unknown	1		CYT	-	-	-	-	-	-	-	-	-	-	-	-				0	0	0	NA	NA	1981.38	2524.41	3441.31
BHCHEMG|NC_005956_533119_533445_+1_ATG_108	NC_005956	533119	533445	+1	ATG	324	1				533119..533445(+)		ORF_533119..533445_108aa_+1			108	CytoplasmicMembrane	0		CYT	-	-	-	-	-	-	-	-	-	-	-	-				0	0	0	NA	NA	0	0	0
BHORF|NC_005956_534467_534174_-3_ATG_97	NC_005956	534174	534467	-3	ATG	291	1						ORF_534174..534467_97aa_-3			97	Unknown	0		CYT	-	-	-	-	-	-	-	-	-	-	-	-				0	1	1	NA	NA	0	0	0
BH_RS02270|rso|ens|geno|chemg|prod|NC_005956_532836_534932_+3_ATG_698	NC_005956	532836	534932	+3	ATG	2094	0	BH_RS02270	BH04620	BH04620	532836..534932(+)	NC_005956_04730	ORF_532836..534932_698aa_+3	n to n	BHPROD|MQB277_553312_555408_+1_ATG_698	698	Unknown	0		CYT	G3DSA:2.130.10.120,G3DSA:3.40.50.1820	PTHR11757:SF3,PTHR11757	PF00326;Prolyl oligopeptidase family,PF02897;Prolyl oligopeptidase, N-terminal beta-propeller domain	-	PR00862;Prolyl oligopeptidase serine protease (S9A) signature	-	-	-	-	SSF53474,SSF50993	-	-	oligopeptidase B EC 3.4.21.83	aproNOG	E	1	53	395	-0.0128498	0.994791	7676.38	11243.6	15223.4	0	10	7.34279	1.10091e-07	Cyt predominant
BH_RS02275|rso|ens|geno|chemg|prod|NC_005956_535615_535013_-1_ATG_200	NC_005956	535013	535615	-1	ATG	600	0	BH_RS02275	BH04630	BH04630	535013..535615(-)	NC_005956_04740	ORF_535013..535615_200aa_-1	n to n	BHPROD|MQB277_556091_555489_-2_ATG_200	200	Periplasmic	0		CYT	G3DSA:1.10.287.990	PTHR11404	PF02777;Iron/manganese superoxide dismutases, C-terminal domain,PF00081;Iron/manganese superoxide dismutases, alpha-hairpin domain	PIRSF000349	PR01703;Manganese superoxide dismutase signature	PS00088;Manganese and iron superoxide dismutases signature.	-	-	-	SSF54719,SSF46609	-	-	Destroys radicals which are normally produced within the cells and which are toxic to biological systems (By similarity)	aproNOG	P	1	34	415	-0.162234	0.819019	819.687	1155.8	1993.1	0	10	9.8283	1.64331e-06	Cyt predominant
BHGENO0533|NC_005956_535936_536106_+1_CTG_56	NC_005956	535936	536106	+1	CTG	168	1			BARHE0533			ORF_535996..536106_36aa_+1			56	Unknown	1		CYT	-	-	-	-	-	-	-	-	-	-	-	TMhelix;Region of a membrane-bound protein predicted to be embedded in the membrane.				0	0	0	NA	NA	78.1488	53.2437	157.069
BHGENO0534|NC_005956_536949_536812_-2_CTG_45	NC_005956	536812	536949	-2	CTG	135	1			BARHE0534			ORF_536812..536949_45aa_-2			45	CytoplasmicMembrane	0		CYT	-	-	-	-	-	-	-	-	-	-	-	-				0	0	0	NA	NA	188.737	115.837	325.959
BH_RS02285|rso|ens|geno|chemg|prod|NC_005956_539101_538316_-1_ATG_261	NC_005956	538316	539101	-1	ATG	783	0	BH_RS02285	BH04660	BH04660	538316..539101(-)	NC_005956_04760	ORF_538316..539101_261aa_-1	n to n	BHPROD|MQB277_559577_558792_-2_ATG_261	261	CytoplasmicMembrane	3		TMH	-	-	PF07386;Protein of unknown function (DUF1499)	-	-	-	-	-	-	-	-	TMhelix;Region of a membrane-bound protein predicted to be embedded in the membrane.	Protein of unknown function (DUF1499)	aproNOG	S	0	0	0	NA	NA	377.208	395.23	767.755
BHCHEMG|NC_005956_538899_539165_+3_CTG_88	NC_005956	538899	539165	+3	CTG	264	1				538899..539165(+)		ORF_538953..539165_70aa_+3			88	Unknown	0		CYT	-	-	-	-	-	-	-	-	-	-	-	-				0	0	0	NA	NA	3.91791	2.11977	8.74406
BH_RS02290|rso|ens|geno|prod|NC_005956_540281_539742_-3_GTG_179	NC_005956	539742	540281	-3	GTG	537	0	BH_RS02290	BH04670	BH04670		NC_005956_04770	ORF_539742..540281_179aa_-3	n to n	BHPROD|MQB277_560757_560218_-1_GTG_179	179	Unknown	1		TMH	-	-	-	PIRSF010244	-	-	-	-	-	SSF160935	-	TMhelix;Region of a membrane-bound protein predicted to be embedded in the membrane.	NA	aproNOG	S	1	6	23	0.0878064	1	158.661	114.443	325.866	9.92483	0	3.72351	0.28824	TM exclusive
BH_RS02295|rso|ens|geno|prod|NC_005956_540870_540274_-2_ATG_198	NC_005956	540274	540870	-2	ATG	594	0	BH_RS02295	BH04680	BH04680		NC_005956_04780	ORF_540274..540870_198aa_-2	n to n	BHPROD|MQB277_561346_560750_-3_ATG_198	198	Unknown	1		TMH	G3DSA:2.60.120.600	-	PF06742;Protein of unknown function (DUF1214)	PIRSF009471	-	-	-	-	-	SSF160935	-	TMhelix;Region of a membrane-bound protein predicted to be embedded in the membrane.	Protein of unknown function (DUF1214)	aproNOG	S	1	5	27	0.359403	0.914515	216.291	262.727	399.086	9.94362	0	4.90113	0	IM exclusive
BH_RS02300|rso|ens|geno|chemg|prod|NC_005956_543040_540890_-1_ATG_716	NC_005956	540890	543040	-1	ATG	2148	0	BH_RS02300	BH04690	BH04690	540890..543040(-)	NC_005956_04790	ORF_540890..543040_716aa_-1	n to n	BHPROD|MQB277_563516_561366_-2_ATG_716	716	CytoplasmicMembrane	1		CYT	G3DSA:1.10.3810.10,G3DSA:3.40.710.10	PTHR32282,PTHR32282:SF6	PF00905;Penicillin binding protein transpeptidase domain,PF00912;Transglycosylase	-	-	-	-	-	-	SSF53955,SSF56601	TIGR02074;PBP_1a_fam: penicillin-binding protein, 1A family	TMhelix;Region of a membrane-bound protein predicted to be embedded in the membrane.	penicillin-binding protein 1A	aproNOG	M	1	4	14	0.881356	0.848143	170.039	211.821	387.699	5.78125	0	4.90113	0	IM exclusive
BHCHEMG|NC_005956_541491_541348_-2_ATG_47	NC_005956	541348	541491	-2	ATG	141	1				541348..541491(-)		ORF_541348..541491_47aa_-2			47	Unknown	0		CYT	-	-	-	-	-	-	-	-	-	-	-	-				0	0	0	NA	NA	0	0	0
BHCHEMG|NC_005956_541956_541750_-2_ATG_68	NC_005956	541750	541956	-2	ATG	204	1				541750..541956(-)		ORF_541750..541956_68aa_-2			68	Unknown	0		CYT	-	-	-	-	-	-	-	-	-	-	-	-				0	0	0	NA	NA	0	0	0
BH_RS02305|+14aa_rso|+44aa_chemg|prod|NC_005956_543376_543609_+1_ATG_77	NC_005956	543376	543609	+1	ATG	231	0	BH_RS02305	BH04700	BH04700	543244..543609(+)	NC_005956_04800	ORF_543376..543609_77aa_+1	n to n	BHPROD|MQB277_563852_564085_+2_ATG_77	77	Unknown	0	yes	SpI	-	-	-	-	-	-	-	SignalP-noTM	-	-	-	-	NA	aproNOG	S	1	1	8	NA	NA	2419.06	4393.36	3721.82	7.62695	0	3.7995	0	IM exclusive
BH_RS02310|rso|ens|geno|+5aa_chemg|prod|NC_005956_543628_544296_+1_ATG_222	NC_005956	543628	544296	+1	ATG	666	0	BH_RS02310	BH04710	BH04710	543613..544296(+)	NC_005956_04810	ORF_543628..544296_222aa_+1	n to n	BHPROD|MQB277_564104_564772_+2_ATG_222	222	Cytoplasmic	0		CYT	G3DSA:3.40.50.2300,G3DSA:1.10.10.10	PTHR26402,PTHR26402:SF469	PF00486;Transcriptional regulatory protein, C terminal,PF00072;Response regulator receiver domain	-	-	-	PS50110;Response regulatory domain profile.	-	SM00448;cheY-homologous receiver domain,SM00862;Transcriptional regulatory protein, C terminal	SSF46894,SSF52172	-	-	Two component transcriptional regulator, winged helix family	aproNOG	T	1	10	69	0.0878064	0.974061	4154.81	8329.62	6608.34	6.62856	0.00266761	9.5075	0	IM exclusive
BH_RS02315|rso|ens|geno|chemg|prod|NC_005956_544293_545705_+3_ATG_470	NC_005956	544293	545705	+3	ATG	1410	0	BH_RS02315	BH04720	BH04720	544293..545705(+)	NC_005956_04820	ORF_544293..545705_470aa_+3	n to n	BHPROD|MQB277_564769_566181_+1_ATG_470	470	CytoplasmicMembrane	2		TMH	G3DSA:3.30.565.10	PTHR24423:SF384,PTHR24423	PF02518;Histidine kinase-, DNA gyrase B-, and HSP90-like ATPase	-	PR00344;Bacterial sensor protein C-terminal signature	-	PS50109;Histidine kinase domain profile.	-	SM00387;Histidine kinase-like ATPases	SSF55874,SSF47384	-	TMhelix;Region of a membrane-bound protein predicted to be embedded in the membrane.	Histidine kinase	aproNOG	T	1	25	134	-0.469552	0.675343	511.572	643.614	971.497	10	0	5	6.1563e-07	TM exclusive
BHCHEMG|NC_005956_546502_546287_-1_ATG_71	NC_005956	546287	546502	-1	ATG	213	1				546287..546502(-)		ORF_546287..546502_71aa_-1			71	Unknown	0		CYT	-	-	-	-	-	-	-	-	-	-	-	-				0	0	0	NA	NA	0	0	0
BH_RS02320|rso|ens|geno|chemg|prod|NC_005956_546010_546744_+1_ATG_244	NC_005956	546010	546744	+1	ATG	732	0	BH_RS02320	BH04730	BH04730	546010..546744(+)	NC_005956_04830	ORF_546010..546744_244aa_+1	n to n	BHPROD|MQB277_566486_567220_+2_ATG_244	244	CytoplasmicMembrane	1	yes	TMH	G3DSA:1.25.40.10	-	PF07719;Tetratricopeptide repeat	-	-	-	PS50293;TPR repeat region circular profile.	-	-	SSF48452	-	TMhelix;Region of a membrane-bound protein predicted to be embedded in the membrane.	cytochrome c-type biogenesis protein	aproNOG	O	1	8	40	-0.756074	0.73465	30.5717	20.8249	56.5932	9.76243	0	4.99984	0	IM exclusive
BH_RS02325|rso|ens|geno|chemg|prod|NC_005956_546933_547412_+3_ATG_159	NC_005956	546933	547412	+3	ATG	477	0	BH_RS02325	BH04740	BH04740	546933..547412(+)	NC_005956_04840	ORF_546933..547412_159aa_+3	n to n	BHPROD|MQB277_567409_567888_+1_ATG_159	159	Unknown	1		SpI	G3DSA:2.40.50.140	-	PF03100;CcmE	-	-	-	-	-	-	SSF82093	-	TMhelix;Region of a membrane-bound protein predicted to be embedded in the membrane.	Heme chaperone required for the biogenesis of c-type cytochromes. Transiently binds heme delivered by CcmC and transfers the heme to apo-cytochromes in a process facilitated by CcmF and CcmH (By similarity)	aproNOG	O	1	9	77	0.127516	0.946507	133.922	157.948	287.086	9.99958	0	5	0	IM exclusive
BH_RS02330|rso|ens|geno|chemg|prod|NC_005956_547420_549405_+1_GTG_661	NC_005956	547420	549405	+1	GTG	1983	0	BH_RS02330	BH04750	BH04750	547420..549405(+)	NC_005956_04850	ORF_547525..549405_626aa_+1	n to n	BHPROD|MQB277_567896_569881_+2_GTG_661	661	CytoplasmicMembrane	15		TMH	-	PTHR30009,PTHR30009:SF0	PF01578;Cytochrome C assembly protein	-	PR01411;Cytochrome c-type biogenesis protein CcmF signature,PR01410;Cytochrome c-type biogenesis protein signature	-	-	-	-	-	-	TMhelix;Region of a membrane-bound protein predicted to be embedded in the membrane.	cytochrome c-type biogenesis protein	aproNOG	O	1	4	12	0.466318	0.954389	228.736	255.074	523.818	8.22021	0	4.58823	0	IM exclusive
BHCHEMG|NC_005956_549796_549644_-1_TTG_50	NC_005956	549644	549796	-1	TTG	150	1				549644..549796(-)		ORF_549644..549772_42aa_-1			50	Unknown	0		CYT	-	-	-	-	-	-	-	-	-	-	-	-				0	0	0	NA	NA	0	0	0
BH_RS02335|rso|ens|geno|chemg|prod|NC_005956_549402_549860_+3_ATG_152	NC_005956	549402	549860	+3	ATG	456	0	BH_RS02335	BH04760	BH04760	549402..549860(+)	NC_005956_04860	ORF_549402..549860_152aa_+3	n to n	BHPROD|MQB277_569878_570336_+1_ATG_152	152	CytoplasmicMembrane	1	yes	SpI	-	PTHR30009,PTHR30009:SF3	PF03918;Cytochrome C biogenesis protein	-	-	-	-	SignalP-noTM	-	-	-	TMhelix;Region of a membrane-bound protein predicted to be embedded in the membrane.	cytochrome c biogenesis protein	aproNOG	O	1	2	12	-0.0191088	1	64.9736	90.9485	120.38	5.78125	0	4.79823	0	IM exclusive
BH_RS02340|rso|ens|geno|chemg|prod|NC_005956_550046_551557_+2_ATG_503	NC_005956	550046	551557	+2	ATG	1509	0	BH_RS02340	BH04770	BH04770	550046..551557(+)	NC_005956_04870	ORF_550046..551557_503aa_+2	n to n	BHPROD|MQB277_570522_572033_+3_ATG_503	503	Periplasmic	0	yes	SpII	G3DSA:2.30.42.10,G3DSA:2.40.10.10	PTHR22939,PTHR22939:SF79	PF13365;Trypsin-like peptidase domain,PF13180;PDZ domain	-	PR00834;HtrA/DegQ protease family signature	-	PS50106;PDZ domain profile.	SignalP-noTM	SM00228;Domain present in PSD-95, Dlg, and ZO-1/2.	SSF50494,SSF50156	TIGR02037;degP_htrA_DO: peptidase Do	-	protease	aproNOG	O	1	225	8124	-0.164373	0.695022	2483.67	5200.04	4594.9	7.61398e-10	0	10	0
BH_RS02345|rso|ens|geno|+3aa_chemg|prod|NC_005956_551639_552325_+2_ATG_228	NC_005956	551639	552325	+2	ATG	684	0	BH_RS02345	BH04780	BH04780	551630..552325(+)	NC_005956_04880	ORF_551630..552325_231aa_+2	n to n	BHPROD|MQB277_572115_572801_+3_ATG_228	228	Cytoplasmic	0		CYT	G3DSA:3.40.50.2300,G3DSA:1.10.10.10	PTHR26402:SF469,PTHR26402	PF00486;Transcriptional regulatory protein, C terminal,PF00072;Response regulator receiver domain	-	-	-	PS50110;Response regulatory domain profile.	-	SM00862;Transcriptional regulatory protein, C terminal,SM00448;cheY-homologous receiver domain	SSF52172,SSF46894	-	-	Two component transcriptional regulator, winged helix family	aproNOG	T	1	26	318	-0.198498	0.799269	494.471	1058.01	950.893	0.55668	6.72658e-07	9.87357	0.00462949
BH_RS02350|rso|ens|geno|chemg|prod|NC_005956_552322_553704_+1_ATG_460	NC_005956	552322	553704	+1	ATG	1380	0	BH_RS02350	BH04790	BH04790	552322..553704(+)	NC_005956_04890	ORF_552322..553704_460aa_+1	n to n	BHPROD|MQB277_572798_574180_+2_ATG_460	460	CytoplasmicMembrane	1	yes	TMH	G3DSA:3.30.565.10,G3DSA:1.10.287.130	PTHR24423	PF02518;Histidine kinase-, DNA gyrase B-, and HSP90-like ATPase,PF00512;His Kinase A (phospho-acceptor) domain,PF00672;HAMP domain	-	PR00344;Bacterial sensor protein C-terminal signature	-	PS50109;Histidine kinase domain profile.,PS50885;HAMP domain profile.	-	SM00387;Histidine kinase-like ATPases,SM00304;HAMP (Histidine kinases, Adenylyl cyclases, Methyl binding proteins, Phosphatases) domain,SM00388;His Kinase A (phosphoacceptor) domain	SSF158472,SSF47384,SSF55874	-	TMhelix;Region of a membrane-bound protein predicted to be embedded in the membrane.	Histidine kinase	aproNOG	T	1	26	162	0.0356836	0.984812	373.341	611.304	801.719	9.99999	0	5.95	3.19277e-10	TM exclusive
BH_RS02355|rso|ens|geno|+2aa_chemg|prod|NC_005956_553801_556725_+1_ATG_974	NC_005956	553801	556725	+1	ATG	2922	0	BH_RS02355	BH04800	BH04800	553795..556725(+)	NC_005956_04900	ORF_553801..556725_974aa_+1	n to n	BHPROD|MQB277_574277_577201_+2_ATG_974	974	Cytoplasmic	0		CYT	G3DSA:3.30.460.10	PTHR30621	PF03710;Glutamate-ammonia ligase adenylyltransferase,PF08335;GlnD PII-uridylyltransferase	-	-	-	-	-	-	SSF81593,SSF81301	-	-	Adenylation and deadenylation of glutamate--ammonia ligase (By similarity)	aproNOG	OT	1	29	116	-0.244175	0.847781	497.331	798.981	955.079	9.99958	0	5	1.27498e-11	TM exclusive
BHGENO0550|NC_005956_557730_557575_-2_GTG_51	NC_005956	557575	557730	-2	GTG	153	1			BARHE0550			ORF_557575..557667_30aa_-2			51	Unknown	0		CYT	-	-	-	-	-	-	-	-	-	-	-	-				0	0	0	NA	NA	13.5661	16.6847	21.0048
BH_RS02360|rso|ens|geno|chemg|prod|NC_005956_557708_558532_+2_ATG_274	NC_005956	557708	558532	+2	ATG	822	0	BH_RS02360	BH04810	BH04810	557708..558532(+)	NC_005956_04910	ORF_557708..558532_274aa_+2	n to n	BHPROD|MQB277_578184_579008_+3_ATG_274	274	OuterMembrane	0	yes	SpI	G3DSA:2.40.160.20	-	PF13505;Outer membrane protein beta-barrel domain	-	-	-	-	SignalP-noTM	-	SSF56925	-	-	K16079 outer membrane immunogenic protein	aproNOG	M	1	210	12263	-0.352882	0.392425	9001.63	20228.9	11103.1	10	0	0	10	OM predominant
BH_RS02370|rso|ens|geno|chemg|prod|NC_005956_561786_559465_-2_ATG_773	NC_005956	559465	561786	-2	ATG	2319	0	BH_RS02370	BH04830	BH04830	559465..561786(-)	NC_005956_04930	ORF_559465..561786_773aa_-2	n to n	BHPROD|MQB277_582262_579941_-3_ATG_773	773	CytoplasmicMembrane	2		CYT	G3DSA:3.30.565.10,G3DSA:3.30.450.20,G3DSA:1.10.287.130	PTHR24423	PF12860;PAS fold,PF00512;His Kinase A (phospho-acceptor) domain,PF02518;Histidine kinase-, DNA gyrase B-, and HSP90-like ATPase,PF08447;PAS fold	-	PR00344;Bacterial sensor protein C-terminal signature	-	PS50113;PAC domain profile.,PS50109;Histidine kinase domain profile.	-	SM00387;Histidine kinase-like ATPases,SM00388;His Kinase A (phosphoacceptor) domain	SSF55785,SSF55874,SSF47384	TIGR00229;sensory_box: PAS domain S-box protein	TMhelix;Region of a membrane-bound protein predicted to be embedded in the membrane.	Histidine kinase	aproNOG	T	1	41	193	-0.972794	0.301433	982.38	913.083	2494.25	10	0	5	4.59828e-10	TM predominant
BH_RS02365|rso|ens|geno|chemg|-21aa_prod|NC_005956_558944_559468_+2_ATG_174	NC_005956	558944	559468	+2	ATG	522	0	BH_RS02365	BH04820	BH04820	558944..559468(+)	NC_005956_04920	ORF_558944..559468_174aa_+2	n to n		174	Cytoplasmic	0		CYT	G3DSA:1.10.10.10,G3DSA:3.30.160.70	PTHR10815:SF1,PTHR10815	PF01035;6-O-methylguanine DNA methyltransferase, DNA binding domain	-	-	PS00374;Methylated-DNA--protein-cysteine methyltransferase active site.	-	-	-	SSF46767,SSF53155	TIGR00589;ogt: methylated-DNA--[protein]-cysteine S-methyltransferase	-	Methyltransferase	aproNOG	L	1	3	4	NA	NA	152.304	137.973	338.726	0	0	3.7995	0	IM exclusive
BHCHEMG|NC_005956_559712_559864_+2_TTG_50	NC_005956	559712	559864	+2	TTG	150	1				559712..559864(+)		ORF_559664..559864_66aa_+2			50	Unknown	0		CYT	-	-	-	-	-	-	-	-	-	-	-	-				0	0	0	NA	NA	0	0	0
BHCHEMG|NC_005956_560360_560659_+2_GTG_99	NC_005956	560360	560659	+2	GTG	297	0				560360..560659(+)		ORF_560336..560659_107aa_+2			99	CytoplasmicMembrane	0		CYT	-	-	-	-	-	-	-	-	-	-	-	-				0	0	0	NA	NA	0	0	0
BHPROD|NC_005956_561862_561969_+1_ATG_35	NC_005956	561862	561969	+1	ATG	105	1					NC_005956_04940	ORF_561862..561969_35aa_+1		BHPROD|MQB277_582338_582445_+2_ATG_35	35	Unknown	0		CYT	-	-	-	-	-	-	-	-	-	-	-	-				0	0	0	NA	NA	33.3175	28.9592	84.1837
BH_RS02375|rso|ens|geno|chemg|prod|NC_005956_564698_562071_-3_ATG_875	NC_005956	562071	564698	-3	ATG	2625	0	BH_RS02375	BH04840	BH04840	562071..564698(-)	NC_005956_04950	ORF_562071..564698_875aa_-3	n to n	BHPROD|MQB277_585174_582547_-1_ATG_875	875	CytoplasmicMembrane	0		CYT	G3DSA:1.10.390.10,G3DSA:1.25.50.10	PTHR11533:SF168,PTHR11533	PF01433;Peptidase family M1,PF11940;Domain of unknown function (DUF3458)	-	PR00756;Membrane alanyl dipeptidase (M1) family signature	-	-	-	-	SSF55486,SSF63737	TIGR02414;pepN_proteo: aminopeptidase N	-	aminopeptidase N	aproNOG	E	1	103	1597	0.489806	0.311967	2875.92	2780.52	7477.61	0	10	9.98349	0.00166495	Cyt predominant
BH_RS02380|rso|ens|geno|+19aa_chemg|prod|NC_005956_565602_564775_-2_ATG_275	NC_005956	564775	565602	-2	ATG	825	0	BH_RS02380	BH04850	BH04850	564775..565659(-)	NC_005956_04960	ORF_564775..565602_275aa_-2	n to n	BHPROD|MQB277_586078_585251_-3_ATG_275	275	Unknown	0		CYT	G3DSA:3.40.470.10	-	PF03167;Uracil DNA glycosylase superfamily	-	-	-	-	-	SM00986;Uracil DNA glycosylase superfamily,SM00987;UreE urease accessory protein, C-terminal domain	SSF52141	TIGR00758;UDG_fam4: uracil-DNA glycosylase, family 4	-	Phage SPO1 DNA polymerase-related protein	aproNOG	L	1	19	92	-0.237289	0.872238	124.969	154.117	281.306	8.64613	0.000137202	4.99999	1.20295e-06	TM predominant
BH_RS02385|rso|ens|geno|+7aa_chemg|-3aa_prod|NC_005956_566790_566032_-2_ATG_252	NC_005956	566032	566790	-2	ATG	756	1	BH_RS02385	BH04860	BH04860	566032..566811(-)	NC_005956_04970	ORF_566032..566790_252aa_-2	n to n	BHPROD|MQB277_587257_586508_-3_ATG_249	252	Cytoplasmic	0		CYT	G3DSA:3.40.1190.20	PTHR20858,PTHR20858:SF17	PF08543;Phosphomethylpyrimidine kinase	-	-	-	-	-	-	SSF53613	-	-	Phosphomethylpyrimidine kinase	aproNOG	H	1	6	32	0.285746	0.927018	266.788	251.878	646.082	0.00484379	6.76197	5.91609	0	Cyt predominant
BH_RS02390|rso|ens|geno|chemg|prod|NC_005956_567386_566781_-3_ATG_201	NC_005956	566781	567386	-3	ATG	603	0	BH_RS02390	BH04870	BH04870	566781..567386(-)	NC_005956_04980	ORF_566781..567386_201aa_-3	n to n	BHPROD|MQB277_587862_587257_-1_ATG_201	201	Cytoplasmic	0		CYT	G3DSA:3.20.20.70	PTHR20857	PF02581;Thiamine monophosphate synthase/TENI	-	-	-	-	-	-	SSF51391	-	-	Thiamine-phosphate pyrophosphorylase	aproNOG	H	1	8	43	-0.288569	0.908833	21.6001	23.3469	48.3615	7.63912	0.00488281	4.97207	0.00279273	TM predominant
BH_RS02395|rso|ens|geno|chemg|prod|NC_005956_568156_567383_-1_ATG_257	NC_005956	567383	568156	-1	ATG	771	0	BH_RS02395	BH04880	BH04880	567383..568156(-)	NC_005956_04990	ORF_567383..568156_257aa_-1	n to n	BHPROD|MQB277_588632_587859_-2_ATG_257	257	Cytoplasmic	0		CYT	G3DSA:3.20.20.70	-	PF05690;Thiazole biosynthesis protein ThiG	-	-	-	-	-	-	SSF110399	-	-	Catalyzes the rearrangement of 1-deoxy-D-xylulose 5- phosphate (DXP) to produce the thiazole phosphate moiety of thiamine. Sulfur is provided by the thiocarboxylate moiety of the carrier protein ThiS. In vitro, sulfur can be provided by H(2)S (By similarity)	aproNOG	H	1	16	132	-0.583151	0.603453	204.675	196.976	629.864	0	10	7.81395	0.00569954	Cyt predominant
BHCHEMG|NC_005956_567219_567479_+3_TTG_86	NC_005956	567219	567479	+3	TTG	258	0				567219..567479(+)		ORF_567261..567479_72aa_+3			86	Unknown	0		CYT	-	-	-	-	-	-	-	-	-	-	-	-				0	0	0	NA	NA	0	0	0
BH_RS02400|rso|ens|geno|chemg|prod|NC_005956_568357_568160_-1_ATG_65	NC_005956	568160	568357	-1	ATG	195	1	BH_RS02400	BH04890	BH04890	568160..568357(-)	NC_005956_05000	ORF_568160..568357_65aa_-1	n to n	BHPROD|MQB277_588833_588636_-2_ATG_65	65	Unknown	0		CYT	G3DSA:3.10.20.30	-	PF02597;ThiS family	-	-	-	-	-	-	SSF54285	TIGR01683;thiS: thiamine biosynthesis protein ThiS	-	thiamine biosynthesis protein ThiS	aproNOG	H	1	1	12	0.466318	0.954389	31.8675	26.6642	99.8107	0	0	0	0
BH_RS02405|rso|ens|geno|chemg|prod|NC_005956_569311_568361_-1_TTG_316	NC_005956	568361	569311	-1	TTG	948	0	BH_RS02405	BH04900	BH04900	568361..569311(-)	NC_005956_05010	ORF_568361..569257_298aa_-1	n to n	BHPROD|MQB277_589787_588837_-2_TTG_316	316	Cytoplasmic	0		CYT	G3DSA:3.30.9.10,G3DSA:3.40.50.720	PTHR13847,PTHR13847:SF180	PF01266;FAD dependent oxidoreductase	-	-	-	-	-	-	SSF54373,SSF51971	-	-	Glycine oxidase ThiO	aproNOG	E	1	11	47	-0.0931094	0.988615	254.34	192.433	697.31	3.94828e-05	9.51874	4.99989	0	Cyt predominant
BH_RS02410|rso|ens|geno|+12aa_chemg|prod|NC_005956_571140_569308_-2_ATG_610	NC_005956	569308	571140	-2	ATG	1830	1	BH_RS02410	BH04910	BH04910	569308..571176(-)	NC_005956_05020	ORF_569308..571140_610aa_-2	n to n	BHPROD|MQB277_591616_589784_-3_ATG_610	610	Cytoplasmic	0		CYT	-	PTHR30557,PTHR30557:SF1	PF13667;ThiC-associated domain,PF01964;ThiC family	-	-	-	-	-	-	-	TIGR00190;thiC: phosphomethylpyrimidine synthase	-	Catalyzes the synthesis of the hydroxymethylpyrimidine phosphate (HMP-P) moiety of thiamine from aminoimidazole ribotide (AIR) in a radical S-adenosyl-L-methionine (SAM)-dependent reaction (By similarity)	aproNOG	H	1	49	621	0.498844	0.402529	531.83	460.191	1585.15	0	10	9.34901	0.346386	Cyt predominant
BHGENO0562|prod|NC_005956_572417_572268_-3_ATG_49	NC_005956	572268	572417	-3	ATG	147	1			BARHE0562		NC_005956_05030	ORF_572268..572417_49aa_-3		BHPROD|MQB277_592893_592744_-1_ATG_49	49	Unknown	0		CYT	-	-	-	-	-	-	-	-	-	-	-	-				0	0	0	NA	NA	149.636	175.763	316.49
BHCHEMG|NC_005956_574538_574302_-3_ATG_78	NC_005956	574302	574538	-3	ATG	234	1				574302..574538(-)		ORF_574302..574538_78aa_-3			78	CytoplasmicMembrane	0	yes	CYT	-	-	-	-	-	-	-	-	-	-	-	TMhelix;Region of a membrane-bound protein predicted to be embedded in the membrane.				0	0	0	NA	NA	0	0	0
BHCHEMG|NC_005956_574829_575101_+2_GTG_90	NC_005956	574829	575101	+2	GTG	270	1				574829..575101(+)		ORF_574904..575101_65aa_+2			90	Unknown	1		TMH	-	-	-	-	-	-	-	-	-	-	-	TMhelix;Region of a membrane-bound protein predicted to be embedded in the membrane.				0	0	0	NA	NA	0	0	0
BH_RS02415|rso|ens|geno|+8aa_chemg|prod|NC_005956_574225_575205_+1_ATG_326	NC_005956	574225	575205	+1	ATG	978	1	BH_RS02415	BH04920	BH04920	574201..575205(+)	NC_005956_05040	ORF_574225..575205_326aa_+1	n to n	BHPROD|MQB277_594701_595681_+2_ATG_326	326	Unknown	0		CYT	G3DSA:3.90.1340.10	-	PF07484;Phage Tail Collar Domain	-	-	-	-	-	-	SSF88874	-	-	Phage related protein	aproNOG	S	1	76	601	-1.09633	0.0775991	636.105	1053.96	1537.4	9.99999	0	0	10	OM predominant
BH_RS02420|geno|prod|NC_005956_576088_575876_-1_ATG_70	NC_005956	575876	576088	-1	ATG	210	1	BH_RS02420		BARHE0564		NC_005956_05050	ORF_575876..576088_70aa_-1	0 to n	BHPROD|MQB277_596564_596352_-2_ATG_70	70	Unknown	1		CYT	-	-	-	-	-	-	-	-	-	-	-	TMhelix;Region of a membrane-bound protein predicted to be embedded in the membrane.				0	0	0	NA	NA	149.16	79.045	275.44
BH_RS02425|rso|ens|geno|+53aa_chemg|prod|NC_005956_577255_576455_-1_ATG_266	NC_005956	576455	577255	-1	ATG	798	0	BH_RS02425	BH04930	BH04930	576455..577414(-)	NC_005956_05060	ORF_576455..577279_274aa_-1	n to n	BHPROD|MQB277_597731_596931_-2_ATG_266	266	CytoplasmicMembrane	0		CYT	G3DSA:3.40.50.300	PTHR24220,PTHR24220:SF73	PF00005;ABC transporter	-	-	PS00211;ABC transporters family signature.	PS50893;ATP-binding cassette, ABC transporter-type domain profile.,PS51261;Hemin import ATP-Binding protein hmuV family profile.	-	SM00382;ATPases associated with a variety of cellular activities	SSF52540	-	-	Part of the ABC transporter complex HmuTUV involved in hemin import. Responsible for energy coupling to the transport system (By similarity)	aproNOG	P	1	19	146	-0.387831	0.720046	417.069	246.857	1101.31	9.99915	2.27374e-12	5.15944	1.76327	IM predominant
BHORF|NC_005956_576926_576988_+2_TTG_20	NC_005956	576926	576988	+2	TTG	60	6						ORF_576926..576988_20aa_+2			20	Unknown	0		CYT	-	-	-	-	-	-	-	-	-	-	-	-				0	1	1	NA	NA	0	0	0
BH_RS02430|rso|ens|geno|+6aa_chemg|prod|NC_005956_578349_577252_-2_ATG_365	NC_005956	577252	578349	-2	ATG	1095	0	BH_RS02430	BH04940	BH04940	577252..578367(-)	NC_005956_05070	ORF_577252..578367_371aa_-2	n to n	BHPROD|MQB277_598825_597728_-3_ATG_365	365	CytoplasmicMembrane	10		TMH	G3DSA:1.10.3470.10	PTHR30472,PTHR30472:SF3	PF01032;FecCD transport family	-	-	-	-	-	-	SSF81345	-	TMhelix;Region of a membrane-bound protein predicted to be embedded in the membrane.	permease protein	aproNOG	P	1	10	47	-0.221738	0.931034	935.123	943.935	2668.73	6.83594	0	5.95	0	IM exclusive
BHCHEMG|NC_005956_577187_577426_+2_TTG_79	NC_005956	577187	577426	+2	TTG	237	0				577187..577426(+)		ORF_577199..577426_75aa_+2			79	Unknown	0		CYT	-	-	-	-	-	-	-	-	-	-	-	-				0	0	0	NA	NA	0	0	0
BHCHEMG|NC_005956_577574_577840_+2_ATG_88	NC_005956	577574	577840	+2	ATG	264	0				577574..577840(+)		ORF_577574..577840_88aa_+2			88	Unknown	0		CYT	-	-	-	-	-	-	-	-	-	-	-	-				0	0	0	NA	NA	0	0	0
BH_RS02435|rso|ens|geno|+2aa_chemg|prod|NC_005956_579256_578351_-1_ATG_301	NC_005956	578351	579256	-1	ATG	903	0	BH_RS02435	BH04950	BH04950	578351..579262(-)	NC_005956_05080	ORF_578351..579256_301aa_-1	n to n	BHPROD|MQB277_599732_598827_-2_ATG_301	301	Unknown	0	yes	SpI	G3DSA:3.40.50.1980	PTHR30535,PTHR30535:SF4	PF01497;Periplasmic binding protein	-	-	-	PS50983;Iron siderophore/cobalamin periplasmic-binding domain profile.	-	-	SSF53807	-	-	Periplasmic binding protein	aproNOG	P	1	44	781	-0.22257	0.697738	1105.08	819.977	2697.55	0	10	9.95225	0.0147764	Cyt predominant
BH_RS02440|rso|ens|geno|chemg|prod|NC_005956_580316_579273_-3_ATG_347	NC_005956	579273	580316	-3	ATG	1041	0	BH_RS02440	BH04960	BH04960	579273..580316(-)	NC_005956_05090	ORF_579273..580316_347aa_-3	n to n	BHPROD|MQB277_600792_599749_-1_ATG_347	347	Cytoplasmic	0		CYT	G3DSA:3.40.1570.10	-	PF05171;Haemin-degrading HemS.ChuX domain	-	-	-	-	-	-	SSF144064	-	-	hemin transport protein	aproNOG	P	1	26	171	0.55071	0.565072	3083.59	2653.26	8164.52	0	9.99858	5	1.22499e-07	Cyt predominant
BHPROD|NC_005956_580512_580399_-2_ATG_37	NC_005956	580399	580512	-2	ATG	111	1					NC_005956_05100	ORF_580399..580512_37aa_-2		BHPROD|MQB277_600988_600875_-3_ATG_37	37	Unknown	0		CYT	-	-	-	-	-	-	-	-	-	-	-	-				0	0	0	NA	NA	194.378	183.598	618.348
BH_RS02445|rso|ens|geno|chemg|prod|NC_005956_582748_580571_-1_ATG_725	NC_005956	580571	582748	-1	ATG	2175	0	BH_RS02445	BH04970	BH04970	580571..582748(-)	NC_005956_05110	ORF_580571..582748_725aa_-1	n to n	BHPROD|MQB277_603224_601047_-2_ATG_725	725	OuterMembrane	0	yes	SpI	G3DSA:2.40.170.20,G3DSA:2.170.130.10	PTHR32552:SF7,PTHR32552	PF00593;TonB dependent receptor,PF07715;TonB-dependent Receptor Plug Domain	-	-	-	-	SignalP-noTM	-	SSF56935	TIGR01786;TonB-hemlactrns: TonB-dependent hemoglobin/transferrin/lactoferrin receptor family protein,TIGR01785;TonB-hemin: TonB-dependent heme/hemoglobin receptor family protein	-	receptor	aproNOG	P	1	484	9812	-0.0861241	0.836484	4838.66	4266.72	14902.9	10	0	0	10	OM predominant
BHCHEMG|NC_005956_582546_582725_+3_ATG_59	NC_005956	582546	582725	+3	ATG	177	1				582546..582725(+)		ORF_582546..582725_59aa_+3			59	CytoplasmicMembrane	1		CYT	-	-	-	-	-	-	-	-	-	-	-	-				0	0	0	NA	NA	0	0	0
BHORF|NC_005956_582853_582933_+1_TTG_26	NC_005956	582853	582933	+1	TTG	78	6						ORF_582814..582933_39aa_+1			26	Unknown	0		CYT	-	-	-	-	-	-	-	-	-	-	-	-				0	1	1	NA	NA	24.7396	19.8115	53.7809
BH_RS02450|rso|ens|geno|+16aa_chemg|prod|NC_005956_582990_583781_+3_ATG_263	NC_005956	582990	583781	+3	ATG	789	1	BH_RS02450	BH04980	BH04980	582942..583781(+)	NC_005956_05120	ORF_582942..583781_279aa_+3	n to n	BHPROD|MQB277_603466_604257_+1_ATG_263	263	Unknown	0	yes	TMH	G3DSA:3.30.1150.10	-	PF13103;TonB C terminal	-	-	-	-	-	-	SSF74653	TIGR01352;tonB_Cterm: TonB family C-terminal domain	TMhelix;Region of a membrane-bound protein predicted to be embedded in the membrane.	Pfam:TonB	aproNOG	M	1	3	7	NA	NA	153.795	166.29	366.002	6.83594	0	2.55	0	IM exclusive
BH_RS02455|rso|ens|geno|chemg|prod|NC_005956_586011_583909_-2_ATG_700	NC_005956	583909	586011	-2	ATG	2100	0	BH_RS02455	BH04990	BH04990	583909..586011(-)	NC_005956_05130	ORF_583909..586011_700aa_-2	n to n	BHPROD|MQB277_606487_604385_-3_ATG_700	700	Unknown	0	yes	SpI	G3DSA:1.10.530.10,G3DSA:1.25.20.10	PTHR21666:SF188,PTHR21666	PF01464;Transglycosylase SLT domain	-	-	PS00922;Prokaryotic transglycosylases signature.	-	-	-	SSF48435,SSF53955	-	TMhelix;Region of a membrane-bound protein predicted to be embedded in the membrane.	transglycosylase	aproNOG	M	1	48	241	0.165923	0.849389	65.6853	97.6393	148.273	10	0	0	9.9657	TM exclusive
BHCHEMG|NC_005956_584739_584990_+3_CTG_83	NC_005956	584739	584990	+3	CTG	249	1				584739..584990(+)		ORF_584820..584990_56aa_+3			83	Unknown	0		CYT	-	-	-	-	-	-	-	-	-	-	-	-				0	0	0	NA	NA	0	0	0
BHCHEMG|NC_005956_585569_585829_+2_TTG_86	NC_005956	585569	585829	+2	TTG	258	0				585569..585829(+)		ORF_585587..585829_80aa_+2			86	CytoplasmicMembrane	3		CYT	-	-	-	-	-	-	-	-	-	-	-	-				0	0	0	NA	NA	0	0	0
BHGENO0572|NC_005956_585863_586027_+2_ATG_54	NC_005956	585863	586027	+2	ATG	162	1			BARHE0572			ORF_585863..586027_54aa_+2			54	Unknown	0		CYT	-	-	-	-	-	-	-	-	-	-	-	-				0	0	0	NA	NA	22.1617	21.8309	28.1283
BHCHEMG|NC_005956_587166_586936_-2_TTG_76	NC_005956	586936	587166	-2	TTG	228	1				586936..587166(-)		ORF_586936..587160_74aa_-2			76	CytoplasmicMembrane	0		TMH	-	-	-	-	-	-	-	-	-	-	-	-				0	0	0	NA	NA	0	0	0
BH_RS02460|rso|ens|geno|chemg|prod|NC_005956_586259_587143_+2_ATG_294	NC_005956	586259	587143	+2	ATG	882	0	BH_RS02460	BH05000	BH05000	586259..587143(+)	NC_005956_05140	ORF_586259..587143_294aa_+2	n to n	BHPROD|MQB277_606735_607619_+3_ATG_294	294	Cytoplasmic	0		CYT	G3DSA:3.20.20.70	PTHR12128,PTHR12128:SF15	PF00701;Dihydrodipicolinate synthetase family	PIRSF001365	PR00146;Dihydrodipicolinate synthase signature	PS00666;Dihydrodipicolinate synthase signature 2.	-	-	-	SSF51569	TIGR00674;dapA: 4-hydroxy-tetrahydrodipicolinate synthase	-	Catalyzes the condensation of (S)-aspartate-beta- semialdehyde (S)-ASA and pyruvate to 4-hydroxy- tetrahydrodipicolinate (HTPA) (By similarity)	aproNOG	E	1	32	701	0.0644778	0.91586	508.333	456.574	1132.45	0	10	9.90636	0.052843	Cyt predominant
BH_RS02465|rso|ens|geno|+2aa_chemg|prod|NC_005956_587159_587635_+2_ATG_158	NC_005956	587159	587635	+2	ATG	474	0	BH_RS02465	BH05010	BH05010	587153..587635(+)	NC_005956_05150	ORF_587159..587635_158aa_+2	n to n	BHPROD|MQB277_607635_608111_+3_ATG_158	158	Cytoplasmic	0		CYT	G3DSA:2.40.280.10	PTHR30308:SF2,PTHR30308	PF01668;SmpB protein	-	-	PS01317;SsrA-binding protein.	-	-	-	SSF74982	TIGR00086;smpB: SsrA-binding protein	-	Binds specifically to the SsrA RNA (tmRNA) and is required for stable association of SsrA with ribosomes (By similarity)	aproNOG	O	1	5	96	-0.335136	0.807356	397.013	632.996	658.095	8.67808	5.4643e-05	5.13708	0.366512	IM predominant
BH_RS02470|rso|ens|geno|chemg|prod|NC_005956_588350_587682_-3_ATG_222	NC_005956	587682	588350	-3	ATG	666	0	BH_RS02470	BH05020	BH05020	587682..588350(-)	NC_005956_05160	ORF_587682..588350_222aa_-3	n to n	BHPROD|MQB277_608826_608158_-1_ATG_222	222	Cytoplasmic	0		CYT	G3DSA:3.40.470.10	-	PF03167;Uracil DNA glycosylase superfamily	-	-	-	-	-	SM00987;UreE urease accessory protein, C-terminal domain,SM00986;Uracil DNA glycosylase superfamily	SSF52141	-	-	Uracil-DNA glycosylase	aproNOG	L	1	11	45	1.18621	0.522234	430.147	709.547	878.954	9.89977	0	4.99919	5.52214e-05	TM exclusive
BHCHEMG|NC_005956_587884_588102_+1_ATG_72	NC_005956	587884	588102	+1	ATG	216	0				587884..588102(+)		ORF_587884..588102_72aa_+1			72	CytoplasmicMembrane	0		CYT	-	-	-	-	-	-	-	-	-	-	-	-				0	0	0	NA	NA	0	0	0
BH_RS02475|rso|ens|geno|chemg|prod|NC_005956_588900_589298_+3_ATG_132	NC_005956	588900	589298	+3	ATG	396	0	BH_RS02475	BH05030	BH05030	588900..589298(+)	NC_005956_05170	ORF_588900..589298_132aa_+3	n to n	BHPROD|MQB277_609376_609774_+1_ATG_132	132	Cytoplasmic	0		CYT	G3DSA:3.90.940.10	-	PF01192;RNA polymerase Rpb6	-	-	-	-	-	-	SSF63562	TIGR00690;rpoZ: DNA-directed RNA polymerase, omega subunit	-	Promotes RNA polymerase assembly. Latches the N- and C- terminal regions of the beta' subunit thereby facilitating its interaction with the beta and alpha subunits (By similarity)	aproNOG	K	1	32	511	0.120228	0.854602	3965.45	4461.06	9591.03	0	9.99995	8.49762	0.929033	Cyt predominant
BH_RS02480|rso|ens|geno|chemg|prod|NC_005956_589428_591653_+3_ATG_741	NC_005956	589428	591653	+3	ATG	2223	0	BH_RS02480	BH05040	BH05040	589428..591653(+)	NC_005956_05180	ORF_589428..591653_741aa_+3	n to n		741	Cytoplasmic	0		CYT	G3DSA:3.30.70.260,G3DSA:3.10.20.30,G3DSA:3.30.460.10	PTHR21262:SF0,PTHR21262	PF04607;Region found in RelA / SpoT proteins,PF02824;TGS domain,PF13328;HD domain,PF13291;ACT domain	-	-	-	PS51671;ACT domain profile.	-	SM00954;Region found in RelA / SpoT proteins,SM00471;Metal dependent phosphohydrolases with conserved 'HD' motif.	SSF55021,SSF81301,SSF109604,SSF81271	TIGR00691;spoT_relA: RelA/SpoT family protein	-	In eubacteria ppGpp (guanosine 3'-diphosphate 5-' diphosphate) is a mediator of the stringent response that coordinates a variety of cellular activities in response to changes in nutritional abundance (By similarity)	aproNOG	F	1	44	247	-0.464141	0.582585	468.148	319.887	1279.78	10	0	5	1.47762e-07	TM predominant
BH_RS02485|rso|ens|geno|chemg|prod|NC_005956_591671_592249_+2_GTG_192	NC_005956	591671	592249	+2	GTG	576	0	BH_RS02485	BH05050	BH05050	591671..592249(+)	NC_005956_05190	ORF_591767..592249_160aa_+2	n to n	BHPROD|MQB277_612147_612725_+3_GTG_192	192	Cytoplasmic	0		CYT	G3DSA:3.40.50.2020	PTHR19278	PF00156;Phosphoribosyl transferase domain	-	-	-	-	-	-	SSF53271	TIGR01367;pyrE_Therm: orotate phosphoribosyltransferase	-	Catalyzes the transfer of a ribosyl phosphate group from 5-phosphoribose 1-diphosphate to orotate, leading to the formation of orotidine monophosphate (OMP) (By similarity)	aproNOG	F	1	20	260	-0.026722	0.985808	157.633	179.066	384.414	0.00524937	0.00318303	7.74118	1.53844
BH_RS02490|rso|ens|geno|-36aa_chemg|prod|NC_005956_592343_592945_+2_ATG_200	NC_005956	592343	592945	+2	ATG	600	0	BH_RS02490	BH05060	BH05060	592451..592945(+)	NC_005956_05200	ORF_592343..592945_200aa_+2	n to n	BHPROD|MQB277_612819_613421_+3_ATG_200	200	CytoplasmicMembrane	4		CYT	-	-	PF09835;Uncharacterized protein conserved in bacteria (DUF2062)	-	-	-	-	-	-	-	-	TMhelix;Region of a membrane-bound protein predicted to be embedded in the membrane.	Uncharacterized protein conserved in bacteria (DUF2062)	aproNOG	S	1	4	16	-0.270648	0.983218	131.29	133.365	295.288	0.625	2.5	4.76262	0.0339112
BH_RS02495|rso|ens|geno|chemg|prod|NC_005956_592942_593343_+1_ATG_133	NC_005956	592942	593343	+1	ATG	399	0	BH_RS02495	BH05070	BH05070	592942..593343(+)	NC_005956_05210	ORF_592942..593343_133aa_+1	n to n	BHPROD|MQB277_613418_613819_+2_ATG_133	133	Unknown	0		CYT	G3DSA:3.90.470.20	PTHR11712,PTHR11712:SF233	PF01648;4'-phosphopantetheinyl transferase superfamily	-	-	-	-	-	-	SSF56214	TIGR00556;pantethn_trn: phosphopantetheine--protein transferase domain,TIGR00516;acpS: holo-[acyl-carrier-protein] synthase	-	Transfers the 4'-phosphopantetheine moiety from coenzyme A to a Ser of acyl-carrier-protein (By similarity)	aproNOG	I	1	8	32	0.103748	0.99504	1639.02	2054.05	3264.54	0.00285239	7.72751	4.90113	0	Cyt predominant
BH_RS02500|rso|ens|geno|+14aa_chemg|prod|NC_005956_593424_594236_+3_ATG_270	NC_005956	593424	594236	+3	ATG	810	0	BH_RS02500	BH05080	BH05080	593382..594236(+)	NC_005956_05220	ORF_593382..594236_284aa_+3	n to n	BHPROD|MQB277_613900_614712_+1_ATG_270	270	CytoplasmicMembrane	1		TMH	G3DSA:2.10.109.10	PTHR12383:SF1,PTHR12383	PF00717;Peptidase S24-like	-	PR00727;Bacterial leader peptidase 1 (S26A) family signature	PS00761;Signal peptidases I signature 3.,PS00760;Signal peptidases I lysine active site.	-	-	-	SSF51306	TIGR02227;sigpep_I_bact: signal peptidase I	TMhelix;Region of a membrane-bound protein predicted to be embedded in the membrane.	Signal peptidase i	aproNOG	U	1	57	1519	-0.425306	0.388962	2646.63	3305.11	6342.13	10	0	10	0	IM predominant
BH_RS02505|+11aa_rso|ens|geno|+38aa_chemg|prod|NC_005956_594217_594924_+1_ATG_235	NC_005956	594217	594924	+1	ATG	705	0	BH_RS02505	BH05090	BH05090	594103..594924(+)	NC_005956_05230	ORF_594103..594924_273aa_+1	n to n	BHPROD|MQB277_614693_615400_+2_ATG_235	235	Cytoplasmic	0		CYT	G3DSA:1.10.1520.10,G3DSA:3.30.160.20	PTHR11207	PF00035;Double-stranded RNA binding motif,PF14622;Ribonuclease-III-like	-	-	PS00517;Ribonuclease III family signature.	PS50137;Double stranded RNA-binding domain (dsRBD) profile.,PS50142;Ribonuclease III family domain profile.	-	SM00358;Double-stranded RNA binding motif,SM00535;Ribonuclease III family	SSF54768,SSF69065	TIGR02191;RNaseIII: ribonuclease III	-	Digests double-stranded RNA. Involved in the processing of primary rRNA transcript to yield the immediate precursors to the large and small rRNAs (23S and 16S). Also processes some mRNAs, and tRNAs when they are encoded in the rRNA operon (By similarity)	aproNOG	K	1	21	135	0.187602	0.872045	713.791	819.557	1789.88	7.58778e-10	9.34911	7.75122	0.0404423	Cyt predominant
BH_RS02510|rso|ens|geno|+38aa_chemg|prod|NC_005956_594917_595819_+2_ATG_300	NC_005956	594917	595819	+2	ATG	900	0	BH_RS02510	BH05100	BH05100	594803..595819(+)	NC_005956_05240	ORF_594917..595819_300aa_+2	n to n	BHPROD|MQB277_615393_616295_+3_ATG_300	300	CytoplasmicMembrane	0		CYT	G3DSA:3.40.50.300,G3DSA:3.30.300.20	PTHR11649,PTHR11649:SF3	PF01926;50S ribosome-binding GTPase,PF07650;KH domain	-	-	-	PS50823;Type-2 KH domain profile.,PS51713;Era-type guanine nucleotide-binding (G) domain profile.	-	-	SSF54814,SSF52540	TIGR00436;era: GTP-binding protein Era,TIGR00231;small_GTP: small GTP-binding protein domain	-	An essential GTPase that binds both GDP and GTP, with rapid nucleotide exchange. Plays a role in 16S rRNA processing and 30S ribosomal subunit biogenesis and possibly also in cell cycle regulation and energy metabolism (By similarity)	aproNOG	K	1	17	114	0.873976	0.442997	1845.15	2548.28	4002.18	6.35813e-10	9.54407	8.38669	0.0912667	Cyt predominant
BHCHEMG|NC_005956_596680_596444_-1_TTG_78	NC_005956	596444	596680	-1	TTG	234	1				596444..596680(-)		ORF_596444..596560_38aa_-1			78	CytoplasmicMembrane	1		CYT	-	-	-	-	-	-	-	-	-	-	-	TMhelix;Region of a membrane-bound protein predicted to be embedded in the membrane.	Serpentine type 7TM GPCR chemoreceptor Srj	NOG	U	0	0	0	NA	NA	15.5303	11.3648	50.0051
BH_RS02515|rso|ens|geno|+19aa_chemg|prod|NC_005956_595825_596595_+1_ATG_256	NC_005956	595825	596595	+1	ATG	768	0	BH_RS02515	BH05110	BH05110	595768..596595(+)	NC_005956_05250	ORF_595825..596595_256aa_+1	n to n	BHPROD|MQB277_616301_617071_+2_ATG_256	256	Cytoplasmic	0		CYT	G3DSA:2.40.50.140	-	PF11967;Recombination protein O N terminal,PF02565;Recombination protein O C terminal	-	-	-	-	-	-	SSF50249,SSF57863	TIGR00613;reco: DNA repair protein RecO	-	Involved in DNA repair and RecF pathway recombination (By similarity)	aproNOG	L	1	8	31	0.18621	0.965963	356.832	405.926	690.356	2.61719	0.625	2.94353	1.28164
BHCHEMG|NC_005956_597163_596858_-1_ATG_101	NC_005956	596858	597163	-1	ATG	303	0				596858..597163(-)		ORF_596858..597163_101aa_-1			101	Unknown	0		CYT	-	-	-	-	-	-	-	-	-	-	-	-				0	0	0	NA	NA	0	0	0
BH_RS02520|+2aa_rso|prod|NC_005956_596751_597605_+3_ATG_284	NC_005956	596751	597605	+3	ATG	852	0	BH_RS02520	BH05120	BH05120	596745..597605(+)	NC_005956_05260	ORF_596745..597605_286aa_+3	n to n	BHPROD|MQB277_617227_618081_+1_ATG_284	284	Cytoplasmic	0		CYT	G3DSA:3.30.1300.10,G3DSA:3.40.50.620	PTHR21299:SF1,PTHR21299	PF02569;Pantoate-beta-alanine ligase	-	-	-	-	-	-	SSF52374	TIGR00018;panC: pantoate--beta-alanine ligase,TIGR00125;cyt_tran_rel: cytidyltransferase-like domain	-	Catalyzes the condensation of pantoate with beta-alanine in an ATP-dependent reaction via a pantoyl-adenylate intermediate (By similarity)	aproNOG	H	1	18	191	0.451211	0.622986	748.619	875.51	1715.1	0	10	7.34278	5.35035e-07	Cyt predominant
BH_RS02525|rso|ens|geno|chemg|prod|NC_005956_597609_598436_+3_ATG_275	NC_005956	597609	598436	+3	ATG	825	0	BH_RS02525	BH05130	BH05130	597609..598436(+)	NC_005956_05270	ORF_597609..598436_275aa_+3	n to n	BHPROD|MQB277_618085_618912_+1_ATG_275	275	Cytoplasmic	0		CYT	G3DSA:3.20.20.60	PTHR20881	PF02548;Ketopantoate hydroxymethyltransferase	PIRSF000388	-	-	-	-	-	SSF51621	TIGR00222;panB: 3-methyl-2-oxobutanoate hydroxymethyltransferase	-	Catalyzes the reversible reaction in which hydroxymethyl group from 5,10-methylenetetrahydrofolate is tranferred onto alpha-ketoisovalerate to form ketopantoate (By similarity)	aproNOG	H	1	18	126	0.374688	0.740473	687.07	1077.69	1351.42	0	10	8.2227	0	Cyt predominant
BHGENO0587|NC_005956_598601_598464_-3_CTG_45	NC_005956	598464	598601	-3	CTG	135	1			BARHE0587			ORF_598464..598577_37aa_-3			45	Unknown	0		CYT	-	-	-	-	-	-	-	-	-	-	-	-				0	0	0	NA	NA	221.228	416.862	348.074
BHGENO0588|chemg|NC_005956_598781_598951_+2_ATG_56	NC_005956	598781	598951	+2	ATG	168	1			BARHE0588	598781..598951(+)		ORF_598781..598951_56aa_+2			56	Unknown	0		CYT	-	-	-	-	-	-	-	-	-	-	-	-				0	0	0	NA	NA	405.752	531.863	756.319
BH_RS02530|rso|ens|geno|chemg|prod|NC_005956_600370_599750_-1_ATG_206	NC_005956	599750	600370	-1	ATG	618	0	BH_RS02530	BH05140	BH05140	599750..600370(-)	NC_005956_05280	ORF_599750..600370_206aa_-1	n to n	BHPROD|MQB277_620846_620226_-2_ATG_206	206	Cytoplasmic	0		CYT	G3DSA:1.10.3210.10	-	PF13023;HD domain	-	-	-	-	-	-	SSF109604	-	-	Metal dependent phosphohydrolase	aproNOG	S	1	12	60	-0.0191088	1	505.189	551.73	991.589	0.000513169	6.32061	7.83685	0.000957906	Cyt predominant
BH_RS02535|rso|ens|geno|+7aa_chemg|prod|NC_005956_601236_600379_-2_ATG_285	NC_005956	600379	601236	-2	ATG	855	0	BH_RS02535	BH05150	BH05150	600379..601257(-)	NC_005956_05290	ORF_600379..601236_285aa_-2	n to n	BHPROD|MQB277_621712_620855_-3_ATG_285	285	Cytoplasmic	0		CYT	G3DSA:3.30.70.1400	PTHR22602,PTHR22602:SF0	PF01571;Aminomethyltransferase folate-binding domain,PF08669;Glycine cleavage T-protein C-terminal barrel domain	-	-	-	-	-	-	SSF103025	TIGR03317;ygfZ_signature: folate-binding protein YgfZ	-	glycine cleavage	aproNOG	S	1	10	56	0.0512805	1	10.7859	10.3088	22.4282	0.103095	3.95264	4.99998	1.09191e-06	Cyt predominant
BHCHEMG|NC_005956_601049_601267_+2_TTG_72	NC_005956	601049	601267	+2	TTG	216	1				601049..601267(+)		ORF_601055..601267_70aa_+2			72	CytoplasmicMembrane	1		CYT	-	-	-	-	-	-	-	-	-	-	-	TMhelix;Region of a membrane-bound protein predicted to be embedded in the membrane.				0	0	0	NA	NA	2.15437	1.3756	10.7755
BH_RS02540|rso|ens|geno|chemg|prod|NC_005956_601302_602630_+3_ATG_442	NC_005956	601302	602630	+3	ATG	1326	0	BH_RS02540	BH05160	BH05160	601302..602630(+)	NC_005956_05300	ORF_601302..602630_442aa_+3	n to n	BHPROD|MQB277_621778_623106_+1_ATG_442	442	Cytoplasmic	0		CYT	G3DSA:3.20.20.140,G3DSA:2.30.40.10	PTHR11647:SF52,PTHR11647	PF13147;Amidohydrolase	-	-	PS00483;Dihydroorotase signature 2.	-	-	-	SSF51556,SSF51338	TIGR00857;pyrC_multi: dihydroorotase, multifunctional complex type	-	Dihydropyrimidinase	aproNOG	F	1	29	184	0.309349	0.744841	59.0529	76.4219	144.96	0	10	9.33164	0.0141676	Cyt predominant
BH_RS02545|rso|ens|geno|prod|NC_005956_603230_602859_-3_ATG_123	NC_005956	602859	603230	-3	ATG	369	0	BH_RS02545	BH05170	BH05170		NC_005956_05310	ORF_602859..603230_123aa_-3	n to n	BHPROD|MQB277_623706_623335_-1_ATG_123	123	Unknown	0	yes	SpI	-	-	PF09539;Protein of unknown function (DUF2385)	-	-	-	-	SignalP-noTM	-	-	TIGR02301;TIGR02301: TIGR02301 family protein	-	Protein of unknown function (DUF2385)	aproNOG	S	0	0	0	NA	NA	9.08745	12.1178	13.4109
BHCHEMG|NC_005956_602990_603205_+2_ATG_71	NC_005956	602990	603205	+2	ATG	213	1				602990..603205(+)		ORF_602990..603205_71aa_+2			71	Unknown	0	yes	CYT	-	-	-	-	-	-	-	-	-	-	-	-				0	0	0	NA	NA	0	0	0
BH_RS02550|geno|NC_005956_603583_603368_-1_TTG_71	NC_005956	603368	603583	-1	TTG	213	1	BH_RS02550		BARHE0593			ORF_603368..603532_54aa_-1	0 to n		71	Unknown	0		CYT	-	-	-	-	-	-	-	-	-	-	-	-				0	0	0	NA	NA	199.681	175.856	472.614
BH_RS02555|rso|ens|geno|chemg|prod|NC_005956_603757_605268_+1_ATG_503	NC_005956	603757	605268	+1	ATG	1509	0	BH_RS02555	BH05180	BH05180	603757..605268(+)	NC_005956_05320	ORF_603757..605268_503aa_+1	n to n	BHPROD|MQB277_624233_625744_+2_ATG_503	503	Cytoplasmic	0		CYT	G3DSA:3.40.50.620,G3DSA:1.20.120.640	PTHR10890	PF01406;tRNA synthetases class I (C) catalytic domain	-	PR00983;Cysteinyl-tRNA synthetase signature	-	-	-	-	SSF52374,SSF47323	TIGR00435;cysS: cysteine--tRNA ligase	-	Cysteinyl-tRNA synthetase	aproNOG	J	1	19	138	0.340787	0.753897	372.167	299.422	887.031	0	10	6.7195	1.28462e-07	Cyt predominant
BH_RS02560|rso|ens|geno|+1aa_chemg|prod|NC_005956_605311_605985_+1_ATG_224	NC_005956	605311	605985	+1	ATG	672	1	BH_RS02560	BH05190	BH05190	605308..605985(+)	NC_005956_05330	ORF_605311..605985_224aa_+1	n to n	BHPROD|MQB277_625787_626461_+2_ATG_224	224	CytoplasmicMembrane	3		TMH	G3DSA:3.30.240.20	-	PF04239;Protein of unknown function (DUF421)	-	-	-	-	-	-	-	-	TMhelix;Region of a membrane-bound protein predicted to be embedded in the membrane.	Protein of unknown function (DUF421)	aproNOG	S	1	5	38	-1.01911	0.653837	598.559	711.184	912.667	9.86637	0	4.73078	0.0784478	TM exclusive
BH_RS02565|rso|ens|geno|chemg|prod|NC_005956_606108_607991_+3_ATG_627	NC_005956	606108	607991	+3	ATG	1881	0	BH_RS02565	BH05200	BH05200	606108..607991(+)	NC_005956_05340	ORF_606108..607991_627aa_+3	n to n	BHPROD|MQB277_626584_628467_+1_ATG_627	627	CytoplasmicMembrane	6		CYT	G3DSA:3.40.50.300,G3DSA:1.20.1560.10	PTHR24221,PTHR24221:SF18	PF00005;ABC transporter,PF00664;ABC transporter transmembrane region	-	-	PS00211;ABC transporters family signature.	PS50929;ABC transporter integral membrane type-1 fused domain profile.,PS50893;ATP-binding cassette, ABC transporter-type domain profile.	-	SM00382;ATPases associated with a variety of cellular activities	SSF90123,SSF52540	-	TMhelix;Region of a membrane-bound protein predicted to be embedded in the membrane.	ABC transporter	aproNOG	V	1	51	637	-0.56779	0.346622	3232.82	3749.47	8128.91	10	0	9.85875	0.0509109	IM predominant
BHCHEMG|NC_005956_608956_608792_-1_CTG_54	NC_005956	608792	608956	-1	CTG	162	1				608792..608956(-)		ORF_608792..608911_39aa_-1			54	Unknown	0		CYT	-	-	-	-	-	-	-	-	-	-	-	-				0	0	0	NA	NA	0	0	0
BH_RS02570|rso|ens|geno|chemg|prod|NC_005956_608107_608805_+1_ATG_232	NC_005956	608107	608805	+1	ATG	696	0	BH_RS02570	BH05210	BH05210	608107..608805(+)	NC_005956_05350	ORF_608107..608805_232aa_+1	n to n	BHPROD|MQB277_628583_629281_+2_ATG_232	232	CytoplasmicMembrane	1		TMH	-	-	PF02666;Phosphatidylserine decarboxylase	-	-	-	-	-	-	-	TIGR00164;PS_decarb_rel: phosphatidylserine decarboxylase homolog	TMhelix;Region of a membrane-bound protein predicted to be embedded in the membrane.	Phosphatidylserine decarboxylase proenzyme	aproNOG	I	1	50	1138	-0.188723	0.718943	572.823	821.323	1409.78	10	0	9.99889	0.000449338	IM predominant
BH_RS02575|rso|ens|geno|chemg|prod|NC_005956_608814_609653_+3_ATG_279	NC_005956	608814	609653	+3	ATG	837	0	BH_RS02575	BH05220	BH05220	608814..609653(+)	NC_005956_05360	ORF_608814..609653_279aa_+3	n to n	BHPROD|MQB277_629290_630129_+1_ATG_279	279	CytoplasmicMembrane	8		CYT	-	PTHR15362:SF2,PTHR15362	PF01066;CDP-alcohol phosphatidyltransferase	-	-	PS00379;CDP-alcohol phosphatidyltransferases signature.	-	-	-	-	TIGR00473;pssA: CDP-diacylglycerol-serine O-phosphatidyltransferase	TMhelix;Region of a membrane-bound protein predicted to be embedded in the membrane.	CDP-diacylglycerol--serine O-phosphatidyltransferase	aproNOG	I	1	11	68	-1.00761	0.526099	293.5	460.342	600.217	9.89404	2.8871e-07	3.17709	1.17059	TM predominant
BH_RS02580|rso|ens|geno|chemg|prod|NC_005956_610978_610229_-1_ATG_249	NC_005956	610229	610978	-1	ATG	747	0	BH_RS02580	BH05230	BH05230	610229..610978(-)	NC_005956_05370	ORF_610229..610978_249aa_-1	n to n	BHPROD|MQB277_631454_630705_-2_ATG_249	249	Cytoplasmic	0		CYT	G3DSA:3.40.50.720	PTHR24322:SF222,PTHR24322	PF00106;short chain dehydrogenase	-	PR00080;Short-chain dehydrogenase/reductase (SDR) superfamily signature,PR00081;Glucose/ribitol dehydrogenase family signature	PS00061;Short-chain dehydrogenases/reductases family signature.	-	-	-	SSF51735	-	-	short-chain dehydrogenase reductase	aproNOG	S	1	26	136	-0.695953	0.528276	474.429	460.928	1129.67	5.63703	0.00156276	5.94389	0.00245835	IM predominant
BH_RS02585|+12aa_rso|+15aa_chemg|NC_005956_612471_610981_-2_ATG_496	NC_005956	610981	612471	-2	ATG	1488	0	BH_RS02585	BH05240	BH05240	610981..612516(-)	NC_005956_05380	ORF_610981..612516_511aa_-2	n to n	BHPROD|MQB277_632992_631457_-3_ATG_511	496	Cytoplasmic	0		CYT	G3DSA:3.40.50.2020,G3DSA:3.60.20.10	PTHR11907:SF0,PTHR11907	PF13537;Glutamine amidotransferase domain,PF00156;Phosphoribosyl transferase domain	PIRSF000485	-	-	PS51278;Glutamine amidotransferase type 2 domain profile.	-	-	SSF56235,SSF53271	TIGR01134;purF: amidophosphoribosyltransferase	-	glutamine phosphoribosylpyrophosphate amidotransferase	aproNOG	F	1	39	469	0.398631	0.540347	1001.6	1063.97	2491.58	0	9.97292	9.99984	1.62162e-07	Cyt predominant
BH_RS02590|rso|ens|geno|chemg|prod|NC_005956_613131_612550_-2_ATG_193	NC_005956	612550	613131	-2	ATG	579	0	BH_RS02590	BH05250	BH05250	612550..613131(-)	NC_005956_05390	ORF_612550..613131_193aa_-2	n to n	BHPROD|MQB277_633607_633026_-3_ATG_193	193	CytoplasmicMembrane	4		TMH	-	-	PF02674;Colicin V production protein	-	-	-	-	-	-	-	-	TMhelix;Region of a membrane-bound protein predicted to be embedded in the membrane.	Colicin v production protein	aproNOG	S	1	18	460	-1.10197	0.102907	190.766	257.702	366.443	10	0	9.99685	4.0492e-06	IM predominant
BH_RS02595|rso|ens|geno|chemg|prod|NC_005956_614649_613276_-2_ATG_457	NC_005956	613276	614649	-2	ATG	1371	0	BH_RS02595	BH05260	BH05260	613276..614649(-)	NC_005956_05400	ORF_613276..614649_457aa_-2	n to n	BHPROD|MQB277_635125_633752_-3_ATG_457	457	Cytoplasmic	0		CYT	G3DSA:3.40.50.300,G3DSA:3.30.230.10	PTHR32472,PTHR32472:SF10	PF13481;AAA domain,PF13541;Subunit ChlI of Mg-chelatase	-	PR01874;DNA repair protein radA signature	-	PS50162;RecA family profile 1.	-	SM00382;ATPases associated with a variety of cellular activities	SSF54211,SSF52540	TIGR00416;sms: DNA repair protein RadA	-	May play a role in the repair of endogenous alkylation damage (By similarity)	aproNOG	O	1	29	408	-0.439217	0.527794	201.956	327.82	426.122	10	0	9.99699	0.000249995	IM predominant
BHGENO0602|+135aa_chemg|NC_005956_613004_613336_+2_GTG_110	NC_005956	613004	613336	+2	GTG	330	1			BARHE0602	612599..613336(+)		ORF_612668..613336_222aa_+2			110	CytoplasmicMembrane	2		CYT	-	-	-	-	-	-	-	-	-	-	-	TMhelix;Region of a membrane-bound protein predicted to be embedded in the membrane.				0	0	0	NA	NA	10.5871	18.6847	21.5941
BH_RS02600|rso|ens|geno|+14aa_chemg|prod|NC_005956_616142_614655_-3_ATG_495	NC_005956	614655	616142	-3	ATG	1485	0	BH_RS02600	BH05270	BH05270	614655..616184(-)	NC_005956_05410	ORF_614655..616142_495aa_-3	n to n	BHPROD|MQB277_636618_635131_-1_ATG_495	495	Cytoplasmic	0		CYT	G3DSA:1.10.860.10,G3DSA:3.40.50.300	PTHR30153	PF00772;DnaB-like helicase N terminal domain,PF03796;DnaB-like helicase C terminal domain	-	-	-	PS51199;Superfamily 4 helicase domain profile.	-	SM00382;ATPases associated with a variety of cellular activities	SSF48024,SSF52540	TIGR00665;DnaB: replicative DNA helicase	-	replicative DNA helicase	aproNOG	L	1	61	990	-0.161277	0.766347	110.769	155.299	239.776	10	0	10	1.86118e-09	IM predominant
BHCHEMG|NC_005956_615229_615666_+1_ATG_145	NC_005956	615229	615666	+1	ATG	435	0				615229..615666(+)		ORF_615229..615666_145aa_+1			145	CytoplasmicMembrane	2		CYT	-	-	-	-	-	-	-	-	-	-	-	-				0	0	0	NA	NA	0	0	0
BHGENOBH05280_fCDS1_p|NC_005956_616662_616793_+3_GGC_43	NC_005956	616662	616793	+3	GGC	129	1	BH_RS02605(p)	BH05280(p)	BH05280(p)			ORF_616686..616793_35aa_+3	p to p		43	Unknown	0		CYT	-	-	-	-	-	-	-	-	-	-	-	-				0	0	0	NA	NA	605.894	669.698	1440.69
BHGENOBH05280-2_fCDS2_p|NC_005956_616833_616967_+3_TTG_44	NC_005956	616833	616967	+3	TTG	132	1	BH_RS02605(p)	BH05280(p)	BH05280-2(p)			ORF_616887..616967_26aa_+3	p to p		44	Unknown	0		CYT	-	-	-	-	-	-	-	-	-	-	-	-	Integrase	aproNOG	L	0	0	0	NA	NA	0	0	0
BHCHEMG|NC_005956_617214_616990_-2_ATG_74	NC_005956	616990	617214	-2	ATG	222	1	BH_RS02605(p)	BH05280(p)		616990..617214(-)		ORF_616990..617214_74aa_-2	p to p		74	CytoplasmicMembrane	1		CYT	-	-	-	-	-	-	-	-	-	-	-	-				0	0	0	NA	NA	0	0	0
BH_RS02605_p|-129aa_geno_fCDS3_p|NC_005956_616767_617368_+3_TTG_200	NC_005956	616767	617368	+3	TTG	599	6	BH_RS02605(p)	BH05280(p)	BH05280-3(p)			ORF_617237..617368_43aa_+2	p to p		200	Unknown	0		CYT	-	-	-	-	-	-	-	-	-	-	-	-				0	0	0	NA	NA	11.9324	7.15957	21.6957
BHGENOBH05280-4_fCDS4_p|NC_005956_617405_617521_+2_ATG_38	NC_005956	617405	617521	+2	ATG	114	1	BH_RS02605(p)	BH05280(p)	BH05280-4(p)			ORF_617405..617521_38aa_+2	p to p		38	Unknown	0		CYT	-	-	-	-	-	-	-	-	-	-	-	-	Integrase	aproNOG	L	0	0	0	NA	NA	50.56	24.9796	129.796
BH_RS02610|rso|ens|geno|chemg|prod|NC_005956_618361_617741_-1_ATG_206	NC_005956	617741	618361	-1	ATG	618	0	BH_RS02610	BH05290	BH05290	617741..618361(-)	NC_005956_05420	ORF_617741..618361_206aa_-1	n to n	BHPROD|MQB277_638837_638217_-2_ATG_206	206	Cytoplasmic	0		CYT	G3DSA:3.40.5.10,G3DSA:3.10.430.100	PTHR21368	PF03948;Ribosomal protein L9, C-terminal domain,PF01281;Ribosomal protein L9, N-terminal domain	-	-	PS00651;Ribosomal protein L9 signature.	-	-	-	SSF55653,SSF55658	TIGR00158;L9: ribosomal protein bL9	-	Binds to the 23S rRNA (By similarity)	aproNOG	J	1	74	2190	0.114116	0.806694	424.413	307.729	1262.99	0	10	4.44827	5.10749	Cyt predominant
BH_RS02615|rso|ens|geno|chemg|prod|NC_005956_619366_618386_-1_ATG_326	NC_005956	618386	619366	-1	ATG	978	0	BH_RS02615	BH05300	BH05300	618386..619366(-)	NC_005956_05430	ORF_618386..619366_326aa_-1	n to n	BHPROD|MQB277_639842_638862_-2_ATG_326	326	CytoplasmicMembrane	9		TMH	-	-	-	-	-	-	-	-	-	-	-	TMhelix;Region of a membrane-bound protein predicted to be embedded in the membrane.	NA	aproNOG	S	1	2	39	-0.533682	0.821335	166.187	169.855	358.858	9.99821	0	4.57487	0.0692064	TM exclusive
BHCHEMG|NC_005956_618516_618767_+3_ATG_83	NC_005956	618516	618767	+3	ATG	249	1				618516..618767(+)		ORF_618516..618767_83aa_+3			83	Unknown	1		CYT	-	-	-	-	-	-	-	-	-	-	-	-				0	0	0	NA	NA	0	0	0
BHCHEMG|NC_005956_619506_619384_-2_ATG_40	NC_005956	619384	619506	-2	ATG	120	1				619384..619506(-)		ORF_619384..619506_40aa_-2			40	Unknown	0		CYT	-	-	-	-	-	-	-	-	-	-	-	-				0	0	0	NA	NA	284.501	189.918	715.898
BH_RS02620|rso|ens|geno|chemg|prod|NC_005956_619758_619510_-2_ATG_82	NC_005956	619510	619758	-2	ATG	246	0	BH_RS02620	BH05310	BH05310	619510..619758(-)	NC_005956_05440	ORF_619510..619758_82aa_-2	n to n	BHPROD|MQB277_640234_639986_-3_ATG_82	82	Cytoplasmic	0		CYT	G3DSA:4.10.640.10	PTHR13479	PF01084;Ribosomal protein S18	-	PR00974;Ribosomal protein S18 family signature	PS00057;Ribosomal protein S18 signature.	-	-	-	SSF46911	TIGR00165;S18: ribosomal protein bS18	-	Binds as a heterodimer with protein S6 to the central domain of the 16S rRNA, where it helps stabilize the platform of the 30S subunit (By similarity)	aproNOG	J	1	31	877	-0.234786	0.672646	38.5926	22.1849	124.996	0	0.00432463	1.59547	7.95872
[truncated: 2,061 more rows]

## Sheet: Bhen Assembly
Please find the legend to this table on the third sheet.	Gene information							Annotation informaton		Protein information & properties																				Experimental evidence								subcellular localization
[truncated: 1,698 more rows]

[truncated: 1 more sheets: Legend]
