# Supplementary material for: An integrative strategy to identify the entire protein coding potential of prokaryotic genomes by proteogenomics
Source: HighWire-hosted journal article supplement (doi:10.1101/gr.218255.116), 2017-11-15
Supplement: Supplemental_Table_S9.xlsx [file Supplemental_Table_S9.xlsx]

## Sheet: Supplemental Table S9
Protein-identifier	Count proteins	Length	Protein-type	Protein-id of anchor sequence* (if different)	No. peptides	total - PSMs	Refseq	Comment
BW25113_JGI|prod|+11aa_chemg|3943920_3944903_+3_ATG_327	1	327	JGI/Prod (RefSeq pseudo)		14	217	peudogene
BW25113_JGI|prod|+20aa_chemg|572281_571214_-3_ATG_355	1	355	JGI/Prod (RefSeq pseudo)		12	73	peudogene
BW25113_JGI|prod|+18aa_chemg|4576578_4575295_-1_ATG_427	1	427	JGI/Prod (RefSeq pseudo)		7	62	peudogene
BW25113_JGI|prod|+8aa_chemg|3809909_3809223_-2_ATG_228	1	228	JGI/Prod (RefSeq pseudo)		7	93	peudogene
BW25113_JGI|prod|1403565_1403738_+3_ATG_57	1	57	JGI/Prod		3	9	not annotated	Highly conserved (> 90% aa id. in E.coli strains); hypothetical protein (no protein domains, Interproscan).	MTTLIYLQIPVPEPIPGDPVPVPDPIPRPQPMPDPPPDEEPIKLSHRERRSARIRAC
BW25113_JGI|prod|chemg|2165214_2164876_-1_ATG_112	1	112	JGI/Prod (RefSeq pseudo)		2	17	peudogene
BW25113_JGI|prod|+5aa_chemg|2096870_2096397_-2_ATG_157	1	157	JGI/Prod (RefSeq pseudo)		3	18	peudogene
BW25113_3926_+7aa_orf|4107171_4105642_-1_ATG_509	1	509	extension to RefSeq protein	BW25113_3926|jgi|prod|+35aa_chemg|4107150_4105642_-1_ATG_502	2	16	identified	Evidence for in silico extension; two peptides -.MTTGQLNMTEK.K(3 PSMs) with initM evidence and M.TTGQLNMTEK.K (13 PSMs)
BW25113_ORF|2552193_2552134_-1_CTG_19	1	19	in silico sORF		1	37	not annotated	sORF; single peptide M.DNPDHVSGAFGVMNNGR.V with 37 PSMs
BW25113_4015_+5aa_chemg|4207022_4208341_+2_ATG_439	1	439	extension to RefSeq protein	BW25113_4015|jgi|prod|+5aa_chemg|4207037_4208341_+2_ATG_434	1	21	identified with start site supported	ChemGenome extension; single peptide (20 PSMs) with initM evidence: -.MEHLHMK.T
BW25113_ORF_+8aa_orf|2310617_2310417_-2_GTG_66	1	66	in silico sORF	BW25113_ORF|2310593_2310417_-2_CTG_58	1	12	identified	Single peptide with initM evidence; -.MSGVRYGQLPVEAGNAGCDK.T with 12 PSMs
BW25113_4243_+24aa_chemg|4460802_4460344_-1_TTG_152	1	152	extension to RefSeq protein	BW25113_4243|jgi|prod|+24aa_chemg|4460730_4460344_-1_ATG_128	1	9	identified	ChemGenome extension; single peptide (9 PSMs) K.VWLPIMSQTFYR.C
BW25113_ORF|3020933_3020859_-2_CTG_24	1	24	in silico sORF	BW25113_ORF|3020933_3020859_-2_CTG_24	1	8	not annotated	sORF; single peptide R.YPSANYVRSR.Y with 8 PSMs
BW25113_0337_+5aa_chemg|351867_353165_+3_ATG_432	1	432	extension to RefSeq protein	BW25113_0337|jgi|prod|+5aa_chemg|351882_353165_+3_GTG_427	1	7	identified with start site supported	ChemGenome extension; single peptide (7 PSMs) M.WRLTVSNNALQTIINAR.L
BW25113_CHEMG|4408720_4409220_+1_CTG_166	1	166	ChemGenome		1	7	not annotated	ChemGenome protein; single peptide R.QGDQCSTVESIK.R with 7 PSMs
BW25113_ORF_+12aa_orf|1302058_1301921_-3_TTG_45	1	45	in silico sORF	BW25113_ORF|1302022_1301921_-3_ATG_33	1	5	identified	sORF, single peptide: R.HHQMSILCR.L with 5 PSMs.
BW25113_ORF|2934396_2934298_-1_GTG_32	1	32	in silico sORF		1	5	identified	sORF; single peptide M.VCGGGTPAAFAAR.R with 5 PSMs
BW25113_1252_+5aa_jgi|prod|1305331_1306065_+1_ATG_244	1	244	extension to RefSeq protein	BW25113_1252|+5aa_jgi|+17aa_chemg|1305346_1306065_+1_ATG_239	1	5	identified	JGI extension with single peptide I.MTSMTLDLPR.R (5 PSMs)
BW25113_3805_+7aa_jgi|prod|chemg|3984147_3983185_-1_ATG_320	1	320	extension to RefSeq protein	BW25113_3805|+7aa_jgi|3984126_3983185_-1_ATG_313	1	3	identified with start site supported	JGI extension with single peptide M.IMTVTSMLDNVLR.I (3 PSMs)
* combined ID as described in Figure 3A
